# Supplementary material
Source: PubMed Central journal article supplement (PMC6535088)
Supplement: NIHMS1022918-supplement-SI1.pdf [file NIHMS1022918-supplement-SI1.pdf]

## CF<sub>2</sub>H, a Hydrogen Bond Donor

Chanan D. Sessler,<sup>†</sup> Martin Rahm,<sup>‡</sup> Sabine Becker,<sup>†</sup> Jacob M. Goldberg,<sup>†</sup> Fang Wang,<sup>†</sup> and  
Stephen J. Lippard<sup>\*†</sup>

<sup>†</sup>Department of Chemistry, Massachusetts Institute of Technology, 77 Massachusetts Avenue,  
Cambridge, MA 02139, United States

<sup>‡</sup>Department of Chemistry and Chemical Biology, Baker Laboratory, Cornell University,  
Ithaca, NY 14853, United States

|                                                                                                               |      |
|---------------------------------------------------------------------------------------------------------------|------|
| 1. Materials and Methods.....                                                                                 | S2   |
| 2. Synthetic Procedures.....                                                                                  | S2   |
| 3. NMR Spectroscopy Studies.....                                                                              | S9   |
| 3.1. Concentration Dependence of NMR Chemical Shifts of <b>1-CF<sub>2</sub>H</b> and <b>1-OH</b> .....        | S9   |
| 3.2. Solvent Dependence of the Conformation of <b>4-NO<sub>2</sub></b> .....                                  | S10  |
| 3.3. Concentration Dependence of the Conformation of <b>4-NO<sub>2</sub></b> .....                            | S11  |
| 4. IR Spectroscopy Studies.....                                                                               | S12  |
| 5. Theoretical Calculations.....                                                                              | S20  |
| 5.1. Potential Energy Surface Calculations and Conformational Distribution.....                               | S20  |
| 5.2. Simulated NMR Spectra.....                                                                               | S41  |
| 5.3. Simulated IR Spectra.....                                                                                | S49  |
| 5.4. Optimized Coordinates of Conformers.....                                                                 | S51  |
| 5.5. Partitioning Analysis.....                                                                               | S75  |
| 6. X-ray Crystallography Studies.....                                                                         | S84  |
| 6.1. CSD Structure Search and Data Analysis.....                                                              | S84  |
| 6.2. Experimental Details of the Crystal Structure Refinement.....                                            | S88  |
| 7. NMR Spectra.....                                                                                           | S121 |
| 8. <i>o</i> -Substituent Effects on the <sup>1</sup> H NMR Chemical Shift of the CF <sub>2</sub> H Group..... | S146 |

## 1. Materials and Methods

### General

Reagents were purchased from commercial sources and used as received. Anhydrous solvents were purchased from commercial sources and stored in an MBraun dry box. Reaction mixtures were monitored by thin-layer chromatography (TLC) on pre-coated, aluminum-backed silica gel 60 F254 plates. Column chromatography was performed on silica gel 60 (230-400 mesh). *o*-Nitro- $\alpha,\alpha$ -difluorotoluene and *p*-bromo- $\alpha,\alpha$ -difluorotoluene were purchased from commercial sources.

### Instrumentation

A ThermoNicolet Avatar 360 spectrometer was used to collect IR spectra and the data were processed with OMNIC software. Melting points were determined using a Stanford Research Systems OptiMelt. NMR spectra were recorded on a 400 MHz Bruker AVANCE-400 NMR spectrometer.  $^1\text{H}$  and  $^{13}\text{C}$  chemical shifts are reported in ppm relative to  $\text{SiMe}_4$  ( $\delta = 0.00$  ppm).  $^1\text{H}$  and  $^{13}\text{C}$  NMR spectra were referenced internally to residual solvent peaks.  $^{19}\text{F}$  spectra were referenced externally to  $\text{CFCl}_3$  (0.00 ppm). Low-resolution EI-MS spectra were obtained with an Agilent 5973N gas chromatograph/mass spectrometer using He carrier gas. High-resolution mass spectra were collected on a Bruker Daltonics APEXIV 4.7 tesla Fourier transform ion cyclotron resonance mass spectrometer with a direct analysis in real time (DART) ionization source at the MIT Department of Chemistry Instrumentation Facility.

## 2. Synthetic Procedures

### *o*-Nitro- $\alpha,\alpha$ -difluorotoluene (**1-CF<sub>2</sub>H**)

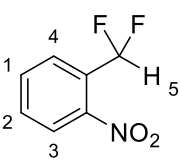  $^1\text{H}$  NMR (400 MHz,  $\text{CDCl}_3$ )  $\delta$  8.16 (H3, dd,  $J = 8.1, 0.7$  Hz, 1H), 7.91 (H4, d,  $J = 7.8$  Hz, 1H), 7.78 (H1, t,  $J = 7.6$  Hz, 1H), 7.68 (H2, t,  $J = 7.8$  Hz, 1H), 7.39 (H5, t,  $J = 54.9$  Hz, 1H).  $^{19}\text{F}$  NMR (376 MHz,  $\text{CDCl}_3$ )  $\delta$  -115.5 (d,  $J = 54.9$  Hz). IR ( $\text{CCl}_4$ ):  $\nu$  3118 (vw), 3089 (w), 3071 (w), 3049 (vw), 3013 (w,  $\text{CF}_2\text{-H}$ ), 2867 (w), 1981 (vw), 1952 (vw), 1849 (vw), 1538 (vs), 1370 (m), 1344 (s), 1209 (m), 1103 (m), 1066 (s).

### *o*-Nitro- $\alpha$ -deutero- $\alpha,\alpha$ -difluorotoluene (**1-CF<sub>2</sub>D**)

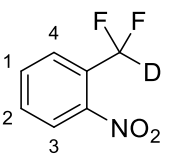 Tetramethylammonium hydroxide pentahydrate (97 mg, 108 mmol), **1-CF<sub>2</sub>H** (94 mg, 54 mmol), and  $\text{D}_2\text{O}$  (270  $\mu\text{L}$ , 15 mmol, 99.9 atom%) were mixed in  $\text{DMSO-}d_6$  (2.25 mL, 99.9 atom %). The reaction was stirred for 48 h at room temperature. The reaction mixture was acidified with  $\text{DCl}$  (162 mmol in 10 mL  $\text{D}_2\text{O}$ , 99.9%). The reaction mixture was then extracted with pentane (10 mL  $\times$  3). The combined organic phase was washed with brine (10 mL) and dried over  $\text{MgSO}_4$ . The solvent was removed under vacuum. The crude product was purified by column chromatography using pentane: $\text{CH}_2\text{Cl}_2$  (2:1 to 1:1) to give a colorless solid (50 mg, 53%).  $^1\text{H}$  NMR (400 MHz,  $\text{CDCl}_3$ )  $\delta$  8.16 (H4, d,  $J = 8.1$  Hz, 1H), 7.91 (H3, d,  $J = 7.8$  Hz, 1H), 7.79 (H1, t,  $J = 7.6$  Hz, 1H), 7.72 – 7.64 (H2, m, 1H).  $^{19}\text{F}$  NMR (376 MHz,  $\text{CDCl}_3$ )  $\delta$  -116.1 (t,  $J = 8.4$  Hz).

IR (CCl<sub>4</sub>):  $\nu$  3115 (vw), 3086 (w), 3068 (w), 3046 (vw), 2967 (vw), 2925 (vw), 2870 (w), 2276 and 2237 (w, CF<sub>2</sub>-D), 1977 (vw), 1948 (vw), 1842 (vw), 1538 (vs), 1348 (s), 1282 (m), 1271 (m), 1250 (m), 1209 (m), 1093 (s), 1056 (m), 964 (m).

### *o*-Nitrophenol (1-OH)

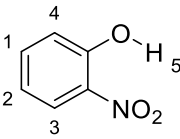 <sup>1</sup>H NMR (400 MHz, CDCl<sub>3</sub>)  $\delta$  10.59 (s, 1H), 8.12 (dd,  $J$  = 8.5, 1.5 Hz, 1H), 7.59 (ddd,  $J$  = 8.7, 7.2, 1.7 Hz, 1H), 7.16 (dd,  $J$  = 8.6, 1.1 Hz, 1H), 7.00 (ddd,  $J$  = 8.6, 7.2, 1.3 Hz, 1H). IR (CCl<sub>4</sub>):  $\nu$  3236 (m, br, O-H), 3108 (vw), 3086 (w), 3071 (w), 3045 (vw), 1959 (w), 1932 (w), 1902 (w), 1622 (s), 1593 (s), 1541 (s), 1477 (s), 1458 (s), 1330 (s), 1253 (m), 1190 (m), 1154 (m), 1133 (m), 1078 (m), 1030 (m).

### *p*-Bromo- $\alpha,\alpha$ -difluorotoluene (2-CF<sub>2</sub>H)

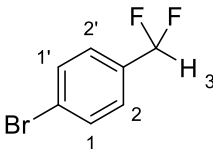 <sup>1</sup>H NMR (400 MHz, CDCl<sub>3</sub>)  $\delta$  7.60 (H1,1', d,  $J$  = 8.7 Hz, 2H), 7.39 (H2,2', d,  $J$  = 8.6 Hz, 2H), 6.61 (H3, t,  $J$  = 56.3 Hz, 1H). <sup>19</sup>F NMR (376 MHz, CDCl<sub>3</sub>)  $\delta$  -111.6 (d,  $J$  = 56.3 Hz). IR (CCl<sub>4</sub>): 3056 (vw), 2969 (w, CF<sub>2</sub>-H), 1607 (m), 1491 (m), 1411 (m), 1370 (m), 1213 (m), 1077 (s), 1041 (s), 1015 (m).

### *p*-Bromophenol (2-OH)

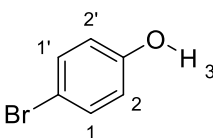 <sup>1</sup>H NMR (400 MHz, CDCl<sub>3</sub>)  $\delta$  7.39 – 7.28 (H1,1', m, 2H), 6.77 – 6.68 (H2,2', m, 2H), 4.78 (H3, s, 1H). IR (CCl<sub>4</sub>):  $\nu$  3608 (m, O-H), 3473 (w, br), 3067 (vw), 3031 (w), 1590 (m), 1491 (vw), 1421 (m), 1319 (m), 1260 (s), 1176 (s), 1089 (m), 1070 (m), 1008 (w).

### TMSCF<sub>2</sub>H

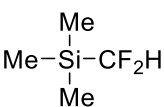 TMSCF<sub>2</sub>H was prepared according to a literature procedure.<sup>1</sup> TMSCF<sub>3</sub> (12.50 g, 88.00 mmol) was used to give TMSCF<sub>2</sub>H as a colorless liquid (4.51 g, 41% yield). <sup>1</sup>H NMR (400 MHz, CDCl<sub>3</sub>)  $\delta$  5.84 (CF<sub>2</sub>H, t, <sup>2</sup>J<sub>H-F</sub> = 46.2 Hz, 1H), 0.17 (Me, s, 9H). <sup>19</sup>F NMR (376 MHz, CDCl<sub>3</sub>)  $\delta$  -139.6 (d, <sup>2</sup>J<sub>F-H</sub> = 46.3 Hz). IR (CCl<sub>4</sub>):  $\nu$  2961 (w), 2899 (w, CF<sub>2</sub>-H), 1319 (w), 1253 (m), 1081 (m), 993(m).

### TMSCF<sub>2</sub>D

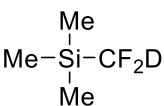 TMSCF<sub>2</sub>D was prepared by a modified literature procedure.<sup>1</sup> Under N<sub>2</sub>, NaBD<sub>4</sub> (1.23 g, 29.50 mmol) was mixed with dry diglyme (25 mL) and cooled in an ice bath. TMSCF<sub>3</sub> (12.50 g, 88.00 mmol) was then added dropwise to the mixture. The mixture was stirred for two hours and gradually warmed to room temperature. The reaction mixture was purified by distillation and fractions with boiling points below 80 °C were collected. The distillate was redistilled with a 10-cm Vigreux column, collecting fractions with boiling points of 62-66 °C to give a colorless liquid (3.30 g, 30% yield). <sup>1</sup>H NMR (400 MHz, CDCl<sub>3</sub>)  $\delta$  0.17 (Me, t, <sup>4</sup>J<sub>H-F</sub> = 0.5 Hz, 9H). <sup>13</sup>C {<sup>1</sup>H} NMR (101 MHz, CDCl<sub>3</sub>)  $\delta$  123.6 (tt, <sup>1</sup>J<sub>C-F</sub> = 253.0, <sup>1</sup>J<sub>C-D</sub> = 25.0 Hz), -5.3 (m). <sup>19</sup>F NMR (376 MHz, CDCl<sub>3</sub>)  $\delta$  -140.3 (pseudo t, <sup>2</sup>J<sub>F-D</sub> = 7.3 Hz, 2F). IR (CCl<sub>4</sub>):  $\nu$  2960 (w), 2925(vw), 2901(vw), 2167 (vw, CF<sub>2</sub>-D), 1253 (m), 1149 (w), 1132 (w), 1030 (m), 982 (w).

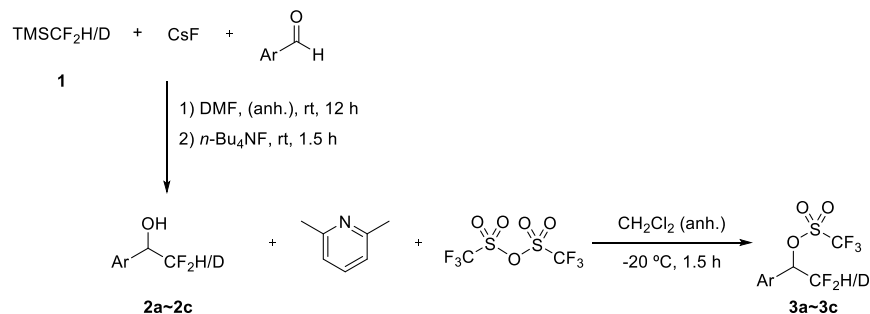

**Scheme S1.** Synthesis of 2,2-difluoro-1-(aryl)ethan-1-ol (**2**) and 2,2-difluoro-1-arylethyl triflate (**3**).

### 2,2-Difluoro-1-(2-nitrophenyl)ethan-1-ol (**3-NO<sub>2</sub>**)

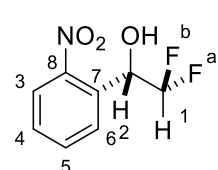

**3-NO<sub>2</sub>** was prepared according to a literature procedure.<sup>2</sup> 2-Nitrobenzaldehyde (453 mg, 3.0 mmol) and TMSCF<sub>2</sub>H (745 mg, 6.0 mmol) were mixed in anhydrous DMF (6 mL). CsF (64 mg, 0.4 mmol) was added to the reaction mixture under positive N<sub>2</sub> flow. The mixture was stirred overnight at room temperature. A solution of *n*-Bu<sub>4</sub>NF (3.0 mL, 1 M in THF) was then added and the mixture was stirred for one hour at room temperature. The mixture was then diluted with water (15 mL) and extracted with CH<sub>2</sub>Cl<sub>2</sub> (20 mL × 3). The combined organic phase was washed with water (20 mL) and dried over Na<sub>2</sub>SO<sub>4</sub>. The solvent was removed under vacuum. The crude product was purified by silica gel chromatography using hexanes:EtOAc (5:1 to 4:1) to give a slightly yellow solid (268 mg, 44% yield). <sup>1</sup>H NMR (400 MHz, CDCl<sub>3</sub>) δ 8.04 (dd, *J* = 8.2, 1.1 Hz, 1H), 7.92 (d, *J* = 7.9 Hz, 1H), 7.73 (td, *J* = 7.7, 1.1 Hz, 1H), 7.55 (ddd, *J* = 7.8, 7.1, 1.4 Hz, 1H), 6.08 (H1, ddd, <sup>2</sup>*J*<sub>H1-Fa</sub> = 55.8, <sup>2</sup>*J*<sub>H1-Fb</sub> = 55.1, <sup>3</sup>*J*<sub>H1-H2</sub> = 2.6 Hz, 1H), 5.65 (H2, ddt, <sup>3</sup>*J*<sub>H2-Fa</sub> = 16.2 Hz, <sup>3</sup>*J*<sub>H2-Fb</sub> = 6.0 Hz, <sup>3</sup>*J*<sub>H1-H2</sub> = 3.0 Hz, <sup>3</sup>*J*<sub>H1-OH</sub> = 3.0 Hz, 1H), 2.78 (OH, d, <sup>3</sup>*J*<sub>OH-H2</sub> = 1.9 Hz, 1H). <sup>13</sup>C{<sup>1</sup>H} NMR (101 MHz, CDCl<sub>3</sub>) δ 148.3, 134.0, 131.3 (dd, <sup>3</sup>*J*<sub>C7-Fa</sub> = 4.9, <sup>3</sup>*J*<sub>C7-Fb</sub> = 2.5 Hz), 129.74 (t, *J*<sub>C6-F,through-space</sub> = 1.2 Hz), 129.72, 124.8, 114.7 (dd, <sup>1</sup>*J*<sub>C1-Fa</sub> = 246.2, <sup>1</sup>*J*<sub>C1-Fb</sub> = 245.4 Hz), 69.0 (dd, <sup>2</sup>*J*<sub>C2-Fa</sub> = 25.0, <sup>2</sup>*J*<sub>C2-Fb</sub> = 22.0 Hz). <sup>19</sup>F NMR (376 MHz, CDCl<sub>3</sub>) δ -125.8 (Fb, ddd, <sup>2</sup>*J*<sub>Fb-Fa</sub> = 281.9, <sup>2</sup>*J*<sub>Fb-H1</sub> = 55.1, <sup>3</sup>*J*<sub>Fb-H2</sub> = 6.3 Hz, 1F), -133.6 (Fa, ddd, <sup>2</sup>*J*<sub>Fa-Fb</sub> = 282.0, <sup>2</sup>*J*<sub>Fa-H1</sub> = 55.9, <sup>3</sup>*J*<sub>Fa-H2</sub> = 16.3 Hz, 1F). IR (CCl<sub>4</sub>): ν 3612 (m, O-H), 3114 (vw), 3085 (w), 3067 (w), 3012, (w, CF<sub>2</sub>-H), 2957 (w), 2924 (w), 2858 (w), 1539 (vs), 1353 (m), 1303 (w), 1185 (w), 1138 (m), 1075 (m), 1053 (m). Mp = 53.4-55.4 °C.

### 2,2-Difluoro-2-deutero-1-(2-nitrophenyl)ethan-1-ol (**3-NO<sub>2</sub>-D**)

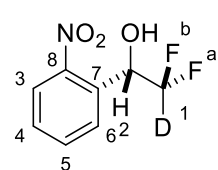

**3-NO<sub>2</sub>-D** was prepared as described above for **3-NO<sub>2</sub>** using TMSCF<sub>2</sub>D and 2-nitrobenzaldehyde on a 2.0 mmol-scale to obtain a slightly yellow solid (153 mg, 38% yield). <sup>1</sup>H NMR (400 MHz, CDCl<sub>3</sub>) δ 8.04 (dd, <sup>4</sup>*J*<sub>H3-H4</sub> = 8.2 Hz, <sup>4</sup>*J*<sub>H3-H5</sub> = 1.1 Hz, 1H), 7.92 (d, <sup>3</sup>*J*<sub>H6-H5</sub> = 7.9 Hz, 1H), 7.73 (td, <sup>3</sup>*J*<sub>H5-H4,6</sub> = 7.7 Hz, <sup>4</sup>*J*<sub>H5-H3</sub> = 1.1 Hz, 1H), 7.55 (dd, <sup>3</sup>*J*<sub>H4-H3</sub> = 7.8, <sup>3</sup>*J*<sub>H4-H5</sub> = 7.1 Hz, <sup>4</sup>*J*<sub>H4-H6</sub> = 1.4 Hz, 1H), 5.65 (H2, ddd, <sup>3</sup>*J*<sub>H2-Fa</sub> = 16.3, <sup>3</sup>*J*<sub>H2-Fb</sub> = 6.2 Hz, <sup>3</sup>*J*<sub>H2-OH</sub> = 4.4 Hz, 1H), 2.74 (OH, d, <sup>3</sup>*J*<sub>OH-H2</sub> = 4.4 Hz, 1H). <sup>19</sup>F NMR (376 MHz, CDCl<sub>3</sub>) δ -126.4 (Fb, ddt, <sup>2</sup>*J*<sub>Fb-Fa</sub> = 282.4, <sup>3</sup>*J*<sub>Fb-H2</sub> = 8.2, <sup>2</sup>*J*<sub>Fb-D</sub> = 7.3



Hz, 1F), -134.3 (Fa, ddt,  $^2J_{\text{Fa-Fb}} = 281.7$ ,  $^3J_{\text{Fa-H2}} = 16.7$ ,  $^2J_{\text{Fa-D}} = 8.1$  Hz, 1F). IR (CCl<sub>4</sub>):  $\nu$  3605 (m, br, O-H), 3114 (vw), 3082 (w), 3067 (w), 2954 (w), 2927 (w), 2866 (w), 2250 and 2188 (w, CF<sub>2</sub>-D), 1529 (vs), 1346 (m), 1207 (m), 1186 (m), 1123 (m), 1093 (m), 1060 (m).

### 1-(4-Bromophenyl)-2,2-difluoroethan-1-ol (3-Br)

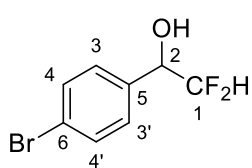

**3-Br** was prepared as described above for **3-NO<sub>2</sub>** using TMSF<sub>2</sub>H and 4-bromobenzaldehyde on a 0.85 mmol-scale to afford a colorless liquid (133 mg, 67% yield). <sup>1</sup>H NMR (400 MHz, CDCl<sub>3</sub>)  $\delta$  7.54 (H4,4', m, 2H), 7.31 (H3,3', m, 2H), 5.72 (H1, td,  $^2J_{\text{H1-F}} = 56.0$  Hz,  $^3J_{\text{H1-H2}} = 4.9$  Hz, 1H), 4.81 (H2, tt,  $^3J_{\text{H2-Fa,b}} = 9.5$  Hz,  $^3J_{\text{H1-H2}} = 4.2$  Hz,  $^3J_{\text{H1-OH}} = 4.2$  Hz, 1H), 2.41 (OH, d,  $^3J_{\text{OH-H2}} = 3.8$  Hz, 1H). <sup>13</sup>C{<sup>1</sup>H} NMR (101 MHz, CDCl<sub>3</sub>)  $\delta$  134.8 (C5, t,  $^3J_{\text{C5-F}} = 3.2$  Hz), 131.9 (C4,4'), 128.9 (C3,3', t,  $^4J_{\text{C3,3'-F}} = 0.8$  Hz), 123.2 (C6), 115.6 (C1, t,  $^1J_{\text{C1-F}} = 245.8$  Hz), 73.1 (C2, t,  $^2J_{\text{C2-F}} = 24.6$  Hz). <sup>19</sup>F NMR (376 MHz, CDCl<sub>3</sub>)  $\delta$  -127.58 (Fa, dd,  $^2J_{\text{Fa-H1}} = 56.1$ ,  $^3J_{\text{Fa-H2}} = 10.4$  Hz, 1F), -127.64 (Fb, dd,  $^2J_{\text{Fb-H1}} = 55.8$ ,  $^3J_{\text{Fb-H2}} = 9.6$  Hz, 1F). IR (CCl<sub>4</sub>):  $\nu$  3618 (m, br, O-H), 3481 (w, br), 3085 (vw), 3052 (vw), 3034 (vw), 2972 (w, CF<sub>2</sub>-H), 2899 (w), 1900 (w), 1594 (m), 1491 (m), 1403 (m), 1377 (m), 1187 (m), 1115 (m), 1081 (s), 1052 (m), 1012 (m).

### 1-(4-Bromophenyl)-2,2-difluoroethan-2-deutero-1-ol (3-Br-D)

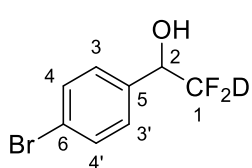

**3-Br-D** was prepared as described above for **3-NO<sub>2</sub>** using TMSF<sub>2</sub>D and 4-bromobenzaldehyde on a 1.27 mmol-scale to give a colorless liquid (232 mg, 77% yield). <sup>1</sup>H NMR (400 MHz, CDCl<sub>3</sub>)  $\delta$  7.54 (H4,4', m, 2H), 7.29 (H3,3', m, 2H), 4.81 (H2, td,  $^3J_{\text{H2-Fa,b}} = 10.0$  Hz,  $^3J_{\text{H2-OH}} = 3.1$  Hz, 1H), 2.45 (OH, d,  $^3J_{\text{OH-H2}} = 3.2$  Hz, 1H). <sup>19</sup>F NMR (376 MHz, CDCl<sub>3</sub>)  $\delta$  -128.30 (Fa, dt,  $^3J_{\text{Fa-H}} = 9.7$  Hz,  $^2J_{\text{Fa-D}} = 8.7$  Hz, 1F), -128.36 (Fb, dt,  $^3J_{\text{Fa-H}} = 9.0$  Hz,  $^2J_{\text{Fa-D}} = 9.0$  Hz, 1F). IR (CCl<sub>4</sub>):  $\nu$  3618 (m, br, O-H), 3470 (w, br), 3082 (vw), 3050 (vw), 3031 (vw), 2971 (vw), 2892 (w), 2248 and 2183 (w, CF<sub>2</sub>-D), 1900 (w), 1593 (m), 1488 (m), 1403 (m), 1213 (m), 1179 (m), 1118 (s), 1067 (s), 1012 (s).

### 2,2-Difluoro-1-(2-fluorophenyl)ethan-1-ol (3-F)

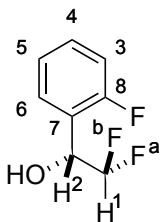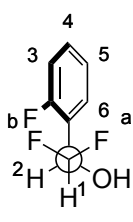

**3-F** was prepared as described above for **3-NO<sub>2</sub>** using TMSF<sub>2</sub>H and 2-fluorobenzaldehyde on a 1.14 mmol-scale to afford a slightly yellow liquid (150 mg, 75% yield). <sup>1</sup>H NMR (400 MHz, CDCl<sub>3</sub>)  $\delta$  7.53 (H6, td,  $^3J_{\text{H6-H5}} = 7.2$  Hz,  $^4J_{\text{H6-F(Ar)}} = 7.2$  Hz,  $^4J_{\text{H6-H4}} = 1.7$  Hz, 1H), 7.37 (H4, dddd,  $^3J_{\text{H4-H3}} = 8.2$ ,  $^3J_{\text{H4-H5}} = 7.3$ ,  $^4J_{\text{H4-F(Ar)}} = 5.4$ ,  $^4J_{\text{H4-H6}} = 1.9$  Hz, 1H), 7.22 (H5, td,  $^3J_{\text{H5-H4}} = 7.4$  Hz,  $^3J_{\text{H5-H6}} = 7.4$  Hz,  $^4J_{\text{H5-H3}} = 1.1$  Hz, 1H), 7.09 (ddd,  $^3J_{\text{H3-F(Ar)}} = 10.5$  Hz,  $^3J_{\text{H3-H4}} = 8.3$  Hz,  $^4J_{\text{H3-H5}} = 1.1$  Hz, 1H), 5.90 (dddd,  $^2J_{\text{H1-Fa}} = 56.1$  Hz,  $^2J_{\text{H1-Fb}} = 55.2$  Hz,  $^3J_{\text{H1-H2}} = 4.0$  Hz,  $J_{\text{H1-F(Ar)}}$ , through space = 1.0 Hz, 1H), 5.19 (ddt,  $^3J_{\text{H2-Fa}} = 13.0$  Hz,  $^3J_{\text{H2-Fb}} = 8.5$  Hz,  $^3J_{\text{H2-H1}} = 4.4$  Hz,  $^3J_{\text{H2-OH}} = 4.4$  Hz, 1H), 2.47 (d,  $^3J_{\text{OH-H2}} = 5.0$  Hz, 1H). <sup>19</sup>F NMR (376 MHz, CDCl<sub>3</sub>)  $\delta$  -118.2 (F(Ar), dddd,  $J_{\text{F(Ar)-H2}}$ , through space = 13.1 Hz,  $^3J_{\text{F(Ar)-H3}} = 10.4$  Hz,  $J_{\text{F(Ar)-Fb}}$ , through space = 5.9 Hz,  $J_{\text{F(Ar)-Fa}}$ , through space =

3.4 Hz, 1F), -127.9 (Fb, dddd,  $^2J_{\text{Fb-Fa}} = 283.6$  Hz,  $^2J_{\text{Fb-H1}} = 55.2$  Hz,  $^3J_{\text{Fb-H2}} = 7.6$  Hz,  $J_{\text{Fb-F(Ar)}}$ , through space = 5.8 Hz, 1F), -129.8 (Fa, dddd,  $^2J_{\text{Fa-Fb}} = 283.8$  Hz,  $^2J_{\text{Fa-H1}} = 56.2$  Hz,  $^3J_{\text{Fa-H2}} = 13.4$  Hz,  $J_{\text{Fa-F(Ar)}}$ , through space = 3.3 Hz, 1F).  $^{19}\text{F}\{^1\text{H}\}$  NMR (376 MHz,  $\text{CDCl}_3$ )  $\delta$  -118.0 (F(Ar), dd,  $J_{\text{F(Ar)-Fb}}$ , through space = 5.9 Hz,  $J_{\text{F(Ar)-Fa}}$ , through space = 3.3 Hz, 1F), -127.3 (Fb, dd,  $^2J_{\text{Fb-Fa}} = 283.7$  Hz,  $^3J_{\text{Fb-F(Ar)}} = 5.9$  Hz, 1F), -129.6 (Fa, dd,  $^2J_{\text{Fa-Fb}} = 283.7$  Hz,  $^3J_{\text{Fa-F(Ar)}} = 3.3$  Hz, 1F).  $^{13}\text{C}\{^1\text{H}\}$  NMR (101 MHz,  $\text{CDCl}_3$ )  $\delta$  160.4 (C8, d,  $^1J_{\text{C8-F(Ar)}} = 247.2$  Hz), 130.7 (C4, d,  $^3J_{\text{C4-F(Ar)}} = 8.4$  Hz), 128.7 (C6, dt,  $^3J_{\text{C6-F(Ar)}} = 3.5$  Hz,  $J_{\text{C6-Fa,b}}$ , through space = 0.8 Hz), 124.7 (C5, d,  $^4J_{\text{C5-F(Ar)}} = 3.5$  Hz), 123.2 (C7, ddd,  $^2J_{\text{C7-F(Ar)}} = 13.2$  Hz,  $^3J_{\text{C7-Fa}} = 3.9$  Hz,  $^3J_{\text{C7-Fb}} = 2.8$  Hz), 115.7 (C3, d,  $^2J_{\text{C3-F(Ar)}} = 21.6$  Hz), 115.1 (C1, ddd,  $^1J_{\text{C1-Fa}} = 245.8$  Hz,  $^1J_{\text{C1-Fb}} = 245.0$  Hz,  $J_{\text{C1-F(Ar)}}$ , through space = 2.8 Hz), 68.2 (C2, ddd,  $^2J_{\text{C2-Fa}} = 26.1$  Hz,  $^2J_{\text{C2-Fb}} = 23.9$  Hz,  $^3J_{\text{C2-F(Ar)}} = 2.3$  Hz). IR ( $\text{CCl}_4$ ):  $\nu$  3609 (m, br, O-H), 3484 (w, br), 3088 (w), 3070 (w), 3045 (w), 2968 (w), 2921 (w), 2851 (vw), 1617 (m), 1588 (m), 1492 (m), 1453 (m), 1385 (m, br), 1236 (m), 1082 (s), 1050 (s).

### 2,2-Difluoro-1-(2-nitrophenyl)ethyl triflate (4- $\text{NO}_2$ )

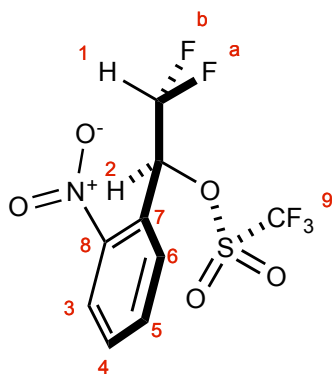

**3- $\text{NO}_2$**  (102 mg, 0.50 mmol) and 2,6-lutidine (116  $\mu\text{L}$ , 1.00 mmol) were mixed in anhydrous  $\text{CH}_2\text{Cl}_2$  (1 mL) under an inert atmosphere. The reaction mixture was cooled to  $-20$   $^\circ\text{C}$  before adding triflic anhydride (134  $\mu\text{L}$ , 0.80 mmol) dropwise. The reaction mixture was stirring for 25 min at  $-20$   $^\circ\text{C}$  and was then warmed to room temperature. The crude product was mixed with cold  $\text{Et}_2\text{O}$  (25 mL) and was quickly washed with cold brine (10 mL), cold HCl (2 M, 10 mL), and cold water (10 mL).

The organic phase was dried over  $\text{MgSO}_4$  and the solvent was removed under vacuum to give a colorless liquid (156 mg, 93% yield).  $^1\text{H}$  NMR (400 MHz,  $\text{CDCl}_3$ )  $\delta$  8.22 (H3, m, 1H), 7.85 (H5, H6, m, 2H), 7.71 (H4, ddd,  $^3J_{\text{H4-H3}} = 8.4$  Hz,  $^3J_{\text{H4-H5}} = 6.2$  Hz,  $^4J_{\text{H4-H6}} = 2.8$  Hz, 1H), 6.67 (H2, ddd,  $^3J_{\text{H2-Fa}} = 15.6$  Hz,  $^3J_{\text{H2-Fb}} = 5.6$  Hz,  $^3J_{\text{H2-H1}} = 1.7$  Hz, 1H), 6.25 (H1, ddd,  $^3J_{\text{H1-Fa}} = 53.5$  Hz,  $^3J_{\text{H1-Fb}} = 53.1$  Hz,  $^3J_{\text{H1-H2}} = 1.7$  Hz, 1H).  $^{19}\text{F}$  NMR (376 MHz,  $\text{CDCl}_3$ )  $\delta$  -74.3 ( $\text{CF}_3$ , d,  $J_{\text{CF}_3\text{-Fb}}$ , through space = 4.1 Hz, 3F), -124.5 (Fb, dddq,  $^2J_{\text{Fb-Fa}} = 285.7$  Hz,  $^2J_{\text{Fb-H1}} = 53.7$  Hz,  $^3J_{\text{Fb-H2}} = 5.6$  Hz,  $J_{\text{Fb-CF}_3}$ , through space = 4.1 Hz, 1F), -133.7 (Fa, ddd,  $^2J_{\text{Fa-Fb}} = 285.5$ ,  $^2J_{\text{Fa-H1}} = 53.8$  Hz,  $^3J_{\text{Fa-H2}} = 15.6$  Hz, 1F).  $^{13}\text{C}\{^1\text{H}\}$  NMR (101 MHz,  $\text{CDCl}_3$ )  $\delta$  147.3 (C8), 135.0 (C5), 131.7 (C4), 129.6 (C6, t,  $^4J_{\text{C6-Fa,b}} = 1.4$  Hz), 125.9 (C7, d,  $^3J_{\text{C7-Fb}} = 5.0$  Hz), 125.7 (C3), 118.4 (C9, q,  $^1J_{\text{C-F}} = 319.7$  Hz), 111.6 (C1, dd,  $^1J_{\text{C1-Fa}} = 250.6$  Hz,  $^1J_{\text{C1-Fb}} = 249.2$  Hz), 79.9 (C2, dd,  $^2J_{\text{C2-Fa}} = 25.5$  Hz,  $^2J_{\text{C2-Fb}} = 21.2$  Hz). IR ( $\text{CCl}_4$ ):  $\nu$  3114 (vw), 3088 (vw), 3070 (vw), 3050 (vw), 3008 (w,  $\text{CF}_2\text{-H}$ ), 2964 (vw), 2924 (w), 2862 (w), 1533 (vs), 1427 (s), 1350 (s), 1247 (s), 1214 (vs), 1141 (vs), 1093 (s), 1002 (m). DART-HRMS(+)  $m/z$  calculated for  $\text{C}_9\text{H}_{10}\text{F}_5\text{N}_2\text{O}_5\text{S}^+$  ( $[\text{M}+\text{NH}_4]^+$ ) = 353.0225, found 353.0226.

**Note 1:** The product was unstable at room temperature and was stored immediately after preparation at  $-80$   $^\circ\text{C}$  or in liquid nitrogen. The compound was stable for up to a few days at  $-80$   $^\circ\text{C}$  and for several weeks at  $-196$   $^\circ\text{C}$ .

**Note 2:** H3 is a multiplet consisting a triplet (8.23 ppm, t,  $J = 0.8$  Hz, 0.5H) and a doublet of doublets (8.21 ppm,  $J = 1.2$ , 0.5 Hz, 0.5H). Although this multiplet may be assigned to two species undergoing a very slow exchange

on the NMR timescale, such an assignment is not supported by theoretical calculations, which do not show any high rotational barriers on the PES. We currently cannot provide a conclusive explanation for this observation. This unsolved multiplet, however, does not change the major conclusions of the manuscript.

### 2,2-Difluoro-2-deutero-1-(2-nitrophenyl)ethyl triflate (4-NO<sub>2</sub>-D)

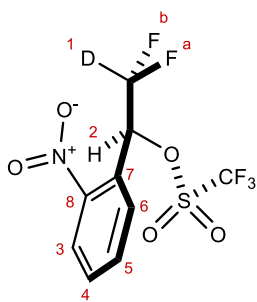

**4-NO<sub>2</sub>-D** was prepared as described above for **4-NO<sub>2</sub>** using **3-NO<sub>2</sub>-D** on a 0.25 mmol-scale to give a colorless liquid (73 mg, 87% yield). <sup>1</sup>H NMR (400 MHz, CDCl<sub>3</sub>) δ 8.22 (H3, d, <sup>3</sup>J<sub>H3-H4</sub> = 8.1 Hz, 1H), 7.85 (H5, H6, m, 2H), 7.71 (H4, ddd, <sup>3</sup>J<sub>H4-H3</sub> = 8.7, <sup>3</sup>J<sub>H4-H5</sub> = 6.1, <sup>4</sup>J<sub>H4-H6</sub> = 2.7 Hz, 1H), 6.67 (H2, dd, <sup>3</sup>J<sub>H2-Fb</sub> = 15.5 Hz, <sup>3</sup>J<sub>H2-Fa</sub> = 5.5 Hz, 1H). <sup>19</sup>F NMR (376 MHz, CDCl<sub>3</sub>) δ -74.3 (CF<sub>3</sub>, d, *J*<sub>CF3-Fb,through space</sub> = 4.1 Hz, 3F), -125.3 (Fb, ddtq, <sup>2</sup>J<sub>Fb-Fb</sub> = 285.8 Hz, <sup>3</sup>J<sub>Fb-H2</sub> = 5.5 Hz, <sup>2</sup>J<sub>Fb-D</sub> = 8.8 Hz, *J*<sub>Fb-CF3,through space</sub> = 4.2 Hz, 1F), -134.3 (Fa, ddt, <sup>3</sup>J<sub>Fa-Fb</sub> = 282.6 Hz, <sup>3</sup>J<sub>Fa-H2</sub> = 15.9 Hz, <sup>3</sup>J<sub>Fa-D</sub> = 8.2 Hz, 1F). IR (CCl<sub>4</sub>): ν 3614 (w), 3116 (vw), 3072 (vw), 3051 (vw), 3012 (vw), 2931 (w), 2868 (w), 2260 and 2200 (vw, CF<sub>2</sub>-D), 1537 (vs), 1429 (s), 1352 (s), 1248 (s), 1221 (vs), 1142 (s), 1138 (m), 1018 (m), 989 (s), 964 (m).

### 1-(4-Bromophenyl)-2,2-difluoroethyl triflate (4-Br)

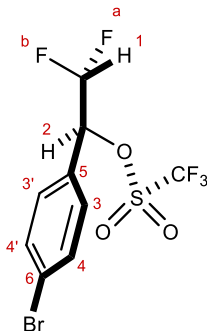

**4-Br** was prepared as described above for **4-NO<sub>2</sub>** using **3-Br** on a 0.30 mmol-scale to give a white solid (91 mg, 83% yield). <sup>1</sup>H NMR (400 MHz, CDCl<sub>3</sub>) δ 7.70 – 7.56 (H4,4', m, 2H), 7.37 – 7.27 (H3,3', m, 2H), 5.98 (H1, td, <sup>1</sup>J<sub>H1-Fa,b</sub> = 54.2 Hz, <sup>2</sup>J<sub>H1-H2</sub> = 4.1 Hz, 1H), 5.68 (H2, td, <sup>3</sup>J<sub>H2-Fa,b</sub> = 9.6 Hz, <sup>3</sup>J<sub>H2-H1</sub> = 4.1 Hz, 1H). <sup>19</sup>F NMR (376 MHz, CDCl<sub>3</sub>) δ -75.2 (CF<sub>3</sub>, pseudo t, *J*<sub>CF3-Fa,b,through space</sub> = 1.7 Hz, 3F), -126.9 (Fa, dddq, <sup>2</sup>J<sub>Fa-Fb</sub> = 293.0 Hz, <sup>2</sup>J<sub>Fa-H1</sub> = 54.6 Hz, <sup>3</sup>J<sub>Fa-H2</sub> = 10.1 Hz, *J*<sub>Fa-CF3,through space</sub> = 2.4 Hz, 1F), -128.4 (Fb, dddq, <sup>2</sup>J<sub>Fb-Fa</sub> = 292.2 Hz, <sup>2</sup>J<sub>Fb-H1</sub> = 54.0 Hz, <sup>3</sup>J<sub>Fb-H2</sub> = 8.9 Hz, *J*<sub>Fb-CF3,through space</sub> = 1.1 Hz). <sup>13</sup>C{<sup>1</sup>H} NMR (101 MHz, CDCl<sub>3</sub>) δ 132.8 (C4,4', s), 129.5 (C3,3', t, <sup>4</sup>J<sub>C3,3'-Fa,b</sub> = 0.9 Hz), 128.6 (C5, t, <sup>3</sup>J<sub>C5-Fa,b</sub> = 2.4 Hz), 125.8 (C6, s), 118.4 (CF<sub>3</sub>, q, <sup>1</sup>J<sub>C-F</sub> = 319.6 Hz), 112.0 (C1, dd, <sup>1</sup>J<sub>C1-Fa or Fb</sub> = 249.7 Hz, <sup>1</sup>J<sub>C1-Fa or Fb</sub> = 247.6 Hz), 84.2 (C2, dd, <sup>2</sup>J<sub>C2-Fa or Fb</sub> = 28.6 Hz, <sup>2</sup>J<sub>C2-Fa or Fb</sub> = 26.2 Hz). IR (CCl<sub>4</sub>): ν 2972 (w, CF<sub>2</sub>-H), 2910 (vw), 1907 (w), 1597 (m), 1491 (m), 1432 (s), 1388 (m), 1246 (s), 1220 (vs), 1140 (vs), 1099 (s), 1074 (m), 1012 (m).

### 1-(4-Bromophenyl)-2,2-difluoroethyl-2-deutero triflate (4-Br-D)

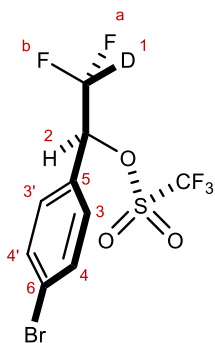

**4-Br-D** was prepared as described above for **4-NO<sub>2</sub>** using **3-Br-D** on a 0.25 mmol-scale to give a white solid (79 mg, 85% yield). <sup>1</sup>H NMR (400 MHz, CDCl<sub>3</sub>) δ 7.63 (H4,4', m, 2H), 7.32 (H3,3', m, 2H), 5.68 (H2, t, <sup>3</sup>J<sub>H2-Fa,b</sub> = 9.5 Hz, 1H). <sup>19</sup>F NMR (376 MHz, CDCl<sub>3</sub>) δ -74.6 (CF<sub>3</sub>, s, 3F), -127.1 (Fa, dt, <sup>2</sup>J<sub>Fa-Fb</sub> = 292.3 Hz, <sup>2</sup>J<sub>Fa-D</sub> = 8.2 Hz, 1F), -128.6 (Fb, dt, <sup>2</sup>J<sub>Fb-Fa</sub> = 292.3 Hz, <sup>2</sup>J<sub>Fb-D</sub> = 8.2 Hz, 1F). IR (CCl<sub>4</sub>): ν 2966 (w), 2926 (w), 2854 (vw), 2206 (w, CF<sub>2</sub>-D), 1903 (w), 1595 (m), 1492 (m), 1427 (vs), 1248 (s), 1221 (vs), 1144 (vs), 1074 (m), 1014 (m), 972 (s).

## 2,2-Difluoro-1-(2-fluorophenyl)ethyl triflate (4-F):

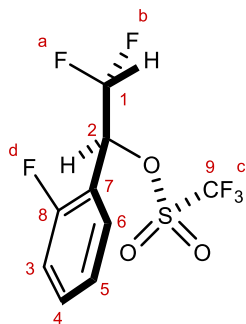

**4-F** was prepared as described above for **4-NO<sub>2</sub>** using **3-F** on a 0.50 mmol-scale to give a colorless liquid (99 mg, 64% yield). <sup>1</sup>H NMR (400 MHz, CDCl<sub>3</sub>) δ 7.51 (H4,6, m, 2H), 7.29 (H5, td, <sup>3</sup>J<sub>H5-H4,6</sub> = 7.6 Hz, <sup>4</sup>J<sub>H5-H3</sub> = 1.2 Hz, 1H), 7.19 (H3, ddd, <sup>3</sup>J<sub>H3-F(Ar)</sub> = 10.0 Hz, <sup>3</sup>J<sub>H3-H4</sub> = 8.8 Hz, <sup>4</sup>J<sub>H3-H5</sub> = 1.1 Hz, 1H), 6.12 (H1, tdd, <sup>2</sup>J<sub>H1-Fa,b</sub> = 54.7 Hz, <sup>3</sup>J<sub>H1-H2</sub> = 4.2 Hz, <sup>3</sup>J<sub>H1-Fd,through space</sub> = 0.8 Hz, 1H), 6.06 (H2, td, <sup>3</sup>J<sub>H2-Fa,b</sub> = 9.3 Hz, <sup>3</sup>J<sub>H2-H1</sub> = 4.3 Hz, 1H). <sup>19</sup>F NMR (376 MHz, CDCl<sub>3</sub>) δ -75.2 (Fc, t, <sup>3</sup>J<sub>Fc-Fa,b,through space</sub> = 1.8 Hz, 3F), -116.9 (Fd, dtt, <sup>3</sup>J<sub>Fd-H3</sub> = 9.4 Hz, <sup>4</sup>J<sub>Fd-H4,6</sub> = 6.1 Hz, <sup>3</sup>J<sub>Fd-Fa,b,through space</sub> = 3.0 Hz, 1F), -127.7 (Fa and Fb, m, 2F). <sup>19</sup>F {<sup>1</sup>H} NMR (376 MHz, CDCl<sub>3</sub>) δ -75.2 (Fc, t, <sup>3</sup>J<sub>Fc-Fa,b,through space</sub> = 1.8 Hz, 3F), -116.9 (Fd, t, <sup>3</sup>J<sub>Fd-Fa,b,through space</sub> = 3.0 Hz, 1F), -127.73 (Fa, dq, <sup>3</sup>J<sub>Fa-Fd,through space</sub> = 2.8 Hz, <sup>3</sup>J<sub>Fa-Fc,through space</sub> = 2.2 Hz, 1F), -127.75 (Fb, dq, <sup>3</sup>J<sub>Fb-Fd,through space</sub> = 3.8 Hz, <sup>3</sup>J<sub>Fb-Fc,through space</sub> = 2.1 Hz, 1F). <sup>13</sup>C {<sup>1</sup>H} NMR (101 MHz, CDCl<sub>3</sub>) δ 160.3 (C8, d, <sup>1</sup>J<sub>C8-Fd</sub> = 250.9 Hz), 133.2 (C4, d, <sup>3</sup>J<sub>C2-Fd</sub> = 8.5 Hz), 129.4 (C6, m), 125.3 (C5, d, <sup>4</sup>J<sub>C1-Fd</sub> = 3.7 Hz), 118.4 (C9, q, <sup>1</sup>J<sub>C9-Fc</sub> = 319.6 Hz), 117.5 (C3, dt, <sup>2</sup>J<sub>C3-Fd</sub> = 12.7 Hz, <sup>3</sup>J<sub>C3-Fa,b,through space</sub> = 2.7 Hz), 116.4 (C7, d, <sup>2</sup>J<sub>C7-Fd</sub> = 21.0 Hz), 111.7 (C1, td, <sup>1</sup>J<sub>C1-Fa,b</sub> = 248.1 Hz, <sup>3</sup>J<sub>C1-Fd,through space</sub> = 3.0 Hz), 79.4 (C2, td, <sup>2</sup>J<sub>C2-Fa,b</sub> = 28.4 Hz, <sup>3</sup>J<sub>C2-Fd,through space</sub> = 2.6 Hz). IR (CCl<sub>4</sub>): ν 3088 (vw), 3070 (vw), 3046 (vw), 2971 (w, CF<sub>2</sub>-H), 2924 (w), 2848 (vw), 1621 (m), 1588 (m), 1492 (m), 1459 (m), 1433 (s), 1247 (s), 1218 (vs), 1145 (vs), 1101 (s), 951 (m).

## 1-(Benzyloxy)-4-(difluoromethyl)benzene (5-CF<sub>2</sub>H):

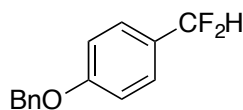

**5-CF<sub>2</sub>H** was prepared by treating 4-(benzyloxy)-1-benzaldehyde (2.0 mmol, 424 mg) in anhydrous CH<sub>2</sub>Cl<sub>2</sub> (2.0 mL) with (diethylamino)sulfur trifluoride (DAST; 6.8 mmol, 1094 mg, 0.90 mL) in a PTFE vial. A portion of CH<sub>3</sub>OH (20 μL) was added as a catalyst and the reaction was stirred at room temperature overnight. The reaction was quenched carefully with sat. Na<sub>2</sub>CO<sub>3</sub>(aq). The mixture was extracted with ethyl acetate (20 mL × 3) and the organic phase was dried over MgSO<sub>4</sub>. The crude product was purified by silica gel column chromatography (CH<sub>2</sub>Cl<sub>2</sub>:hexanes = 15:85 to 20:80 to 30:70) to give a white solid (220 mg, 47% yield). Colorless crystals were obtained by slow evaporation from a CH<sub>2</sub>Cl<sub>2</sub> and hexanes solution. MP 73.9 – 74.7 °C. <sup>1</sup>H NMR (400 MHz, CDCl<sub>3</sub>) δ 7.46-7.33 (m, 7H, Ar-H), 7.03 (pseudo d, <sup>3</sup>J = 8.9 Hz, 2H, Ar-H), 6.60 (t, <sup>3</sup>J = 56.7 Hz, 1H, CF<sub>2</sub>H), 5.11 (s, 2H, CH<sub>2</sub>). <sup>19</sup>F NMR (376 MHz, CDCl<sub>3</sub>) δ -108.9 (d, <sup>3</sup>J = 56.8 Hz, CF<sub>2</sub>H). These data are consistent with published results.<sup>3</sup>

### 3. NMR Spectroscopy Studies

#### 3.1 Concentration Dependence of NMR Chemical Shifts of 1-CF<sub>2</sub>H and 1-OH

The concentration dependence of the NMR chemical shifts of 1-CF<sub>2</sub>H and 1-OH was investigated in CDCl<sub>3</sub> at concentrations of 1, 5, 20, 100, and 500 mM at room temperature. The chemical shift of the CF<sub>2</sub>H proton and the OH proton is independent of concentration from 1 to 100 mM. Slightly upfield shifts were observed at concentrations of 500 mM. This result indicates that hydrogen bonding interactions are predominantly intramolecular at concentrations less than 100 mM.

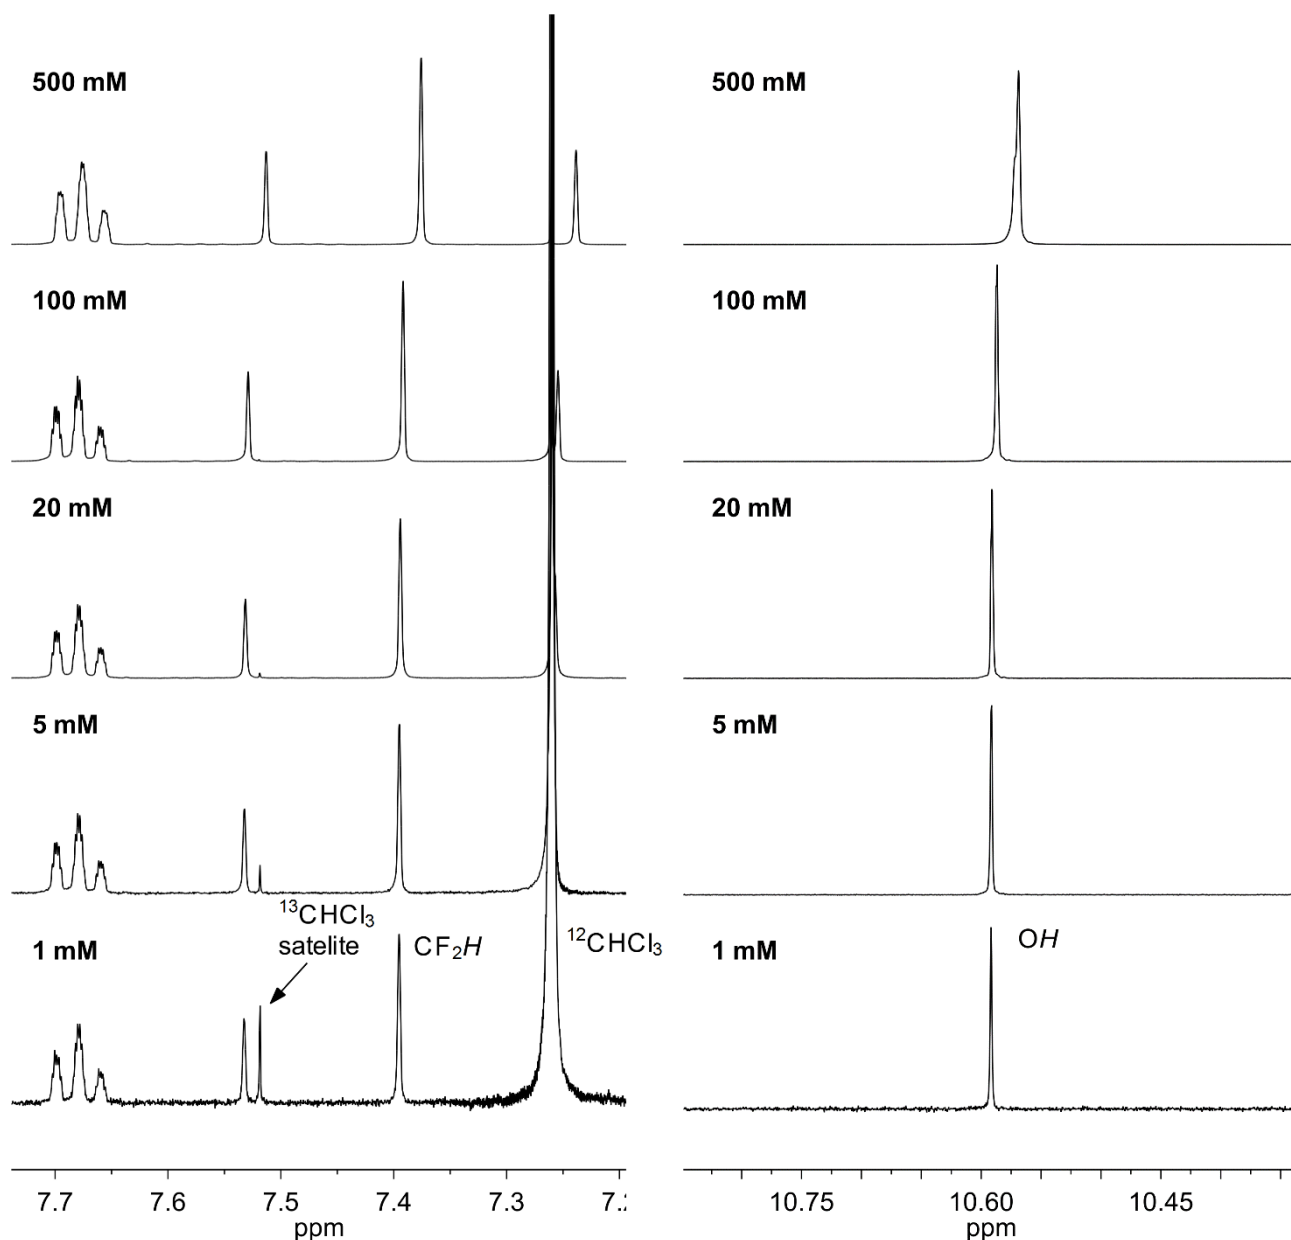

Figure S1. <sup>1</sup>H NMR spectra of 1-CF<sub>2</sub>H (left) and 1-OH (right) in CDCl<sub>3</sub> at different concentrations.

### 3.2 Solvent Dependence of the Conformation of 4-NO<sub>2</sub>

The conformation of 4-NO<sub>2</sub> was investigated at a concentration of 50 mM in four different solvents, including CCl<sub>4</sub> ( $\epsilon = 2.22$ ), CDCl<sub>3</sub> ( $\epsilon = 4.71$ ), CD<sub>3</sub>NO<sub>2</sub> ( $\epsilon = 36.6$ ), and CD<sub>3</sub>CN ( $\epsilon = 35.7$ ).<sup>4</sup> Although DMF-*d*<sub>7</sub> was also used in NMR studies, the compound decomposed rapidly in DMF-*d*<sub>7</sub> at room temperature. The four solvents were chosen not only because of their different dielectric constants, but are also due to their ability to facilitate various specific interactions, such as hydrogen and halogen bonding. As shown in Figure S2, although the <sup>1</sup>H NMR chemical shift of the CF<sub>2</sub>H moiety varies in different solvents, the value, relative to that of the benzylic proton, is almost solvent independent. Other than in CCl<sub>4</sub>, the multiplicity of the benzylic proton and the corresponding coupling constants do not change in different solvents. More importantly, the through-space coupling between the CF<sub>3</sub> group and the F<sup>b</sup> nucleus is a good indicator of the conformation of 4-NO<sub>2</sub>. The coupling constants are only ca. 30% higher in non-polar solvents than those in highly polar solvents, suggesting only a minor change in conformational distribution. In summary, the conformation of 4-NO<sub>2</sub> is insensitive to solvents, which in turn suggests that the intramolecular CF<sub>2</sub>-H<sup>b</sup>⋯O bonding is not significantly perturbed by weak intermolecular forces.

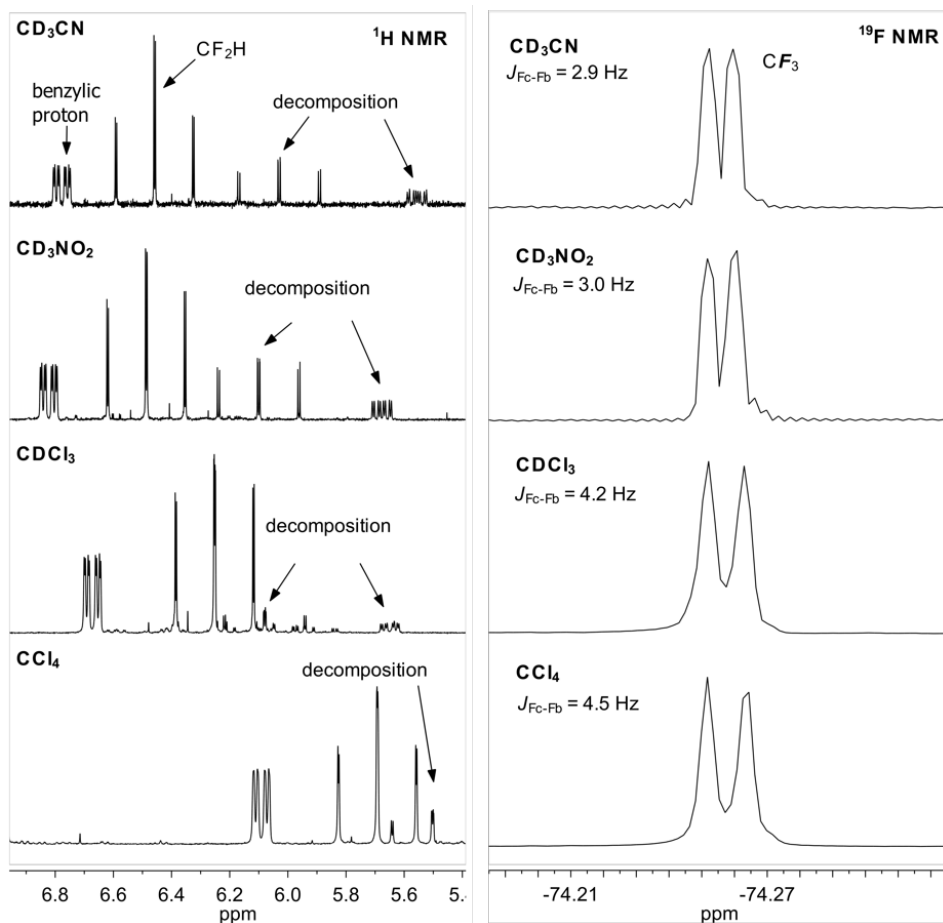

Figure S2. <sup>1</sup>H and <sup>19</sup>F NMR spectra of 4-NO<sub>2</sub> in various solvents.

### 3.3 Concentration Dependence of the Conformation of 4-NO<sub>2</sub>

To investigate whether there are significant intermolecular CF<sub>2</sub>H...O interactions, we performed NMR studies of 4-NO<sub>2</sub> in CDCl<sub>3</sub> at different concentrations. As illustrated in Figure S3, <sup>1</sup>H and <sup>19</sup>F NMR spectra of 4-NO<sub>2</sub> do not show any noticeable differences at concentrations spanning from 10 mM to 100 mM. These results indicate that 4-NO<sub>2</sub> experiences rather weak intermolecular interactions, if any.

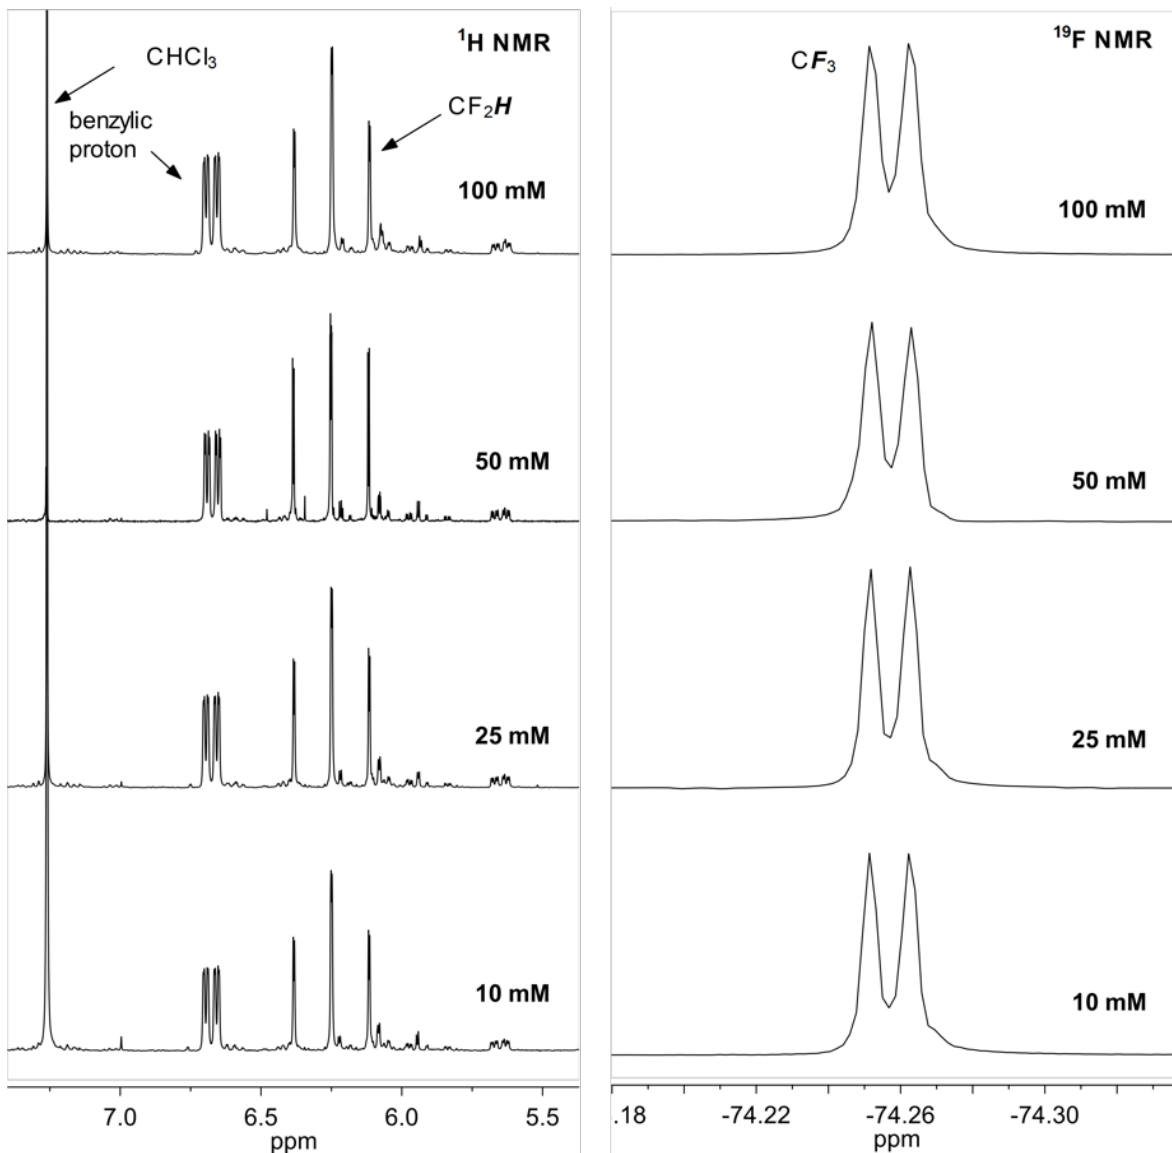

**Figure S3.** <sup>1</sup>H and <sup>19</sup>F NMR spectra of 4-NO<sub>2</sub> in CDCl<sub>3</sub> at various concentrations.

#### 4. IR Spectroscopy Studies

Spectroscopic studies were performed at a concentration of 100 mM in anhydrous  $\text{CCl}_4$ . To identify the  $\text{CF}_2\text{-H}$  bond stretch, the corresponding  $\text{CF}_2\text{-D}$ -containing compounds were synthesized.

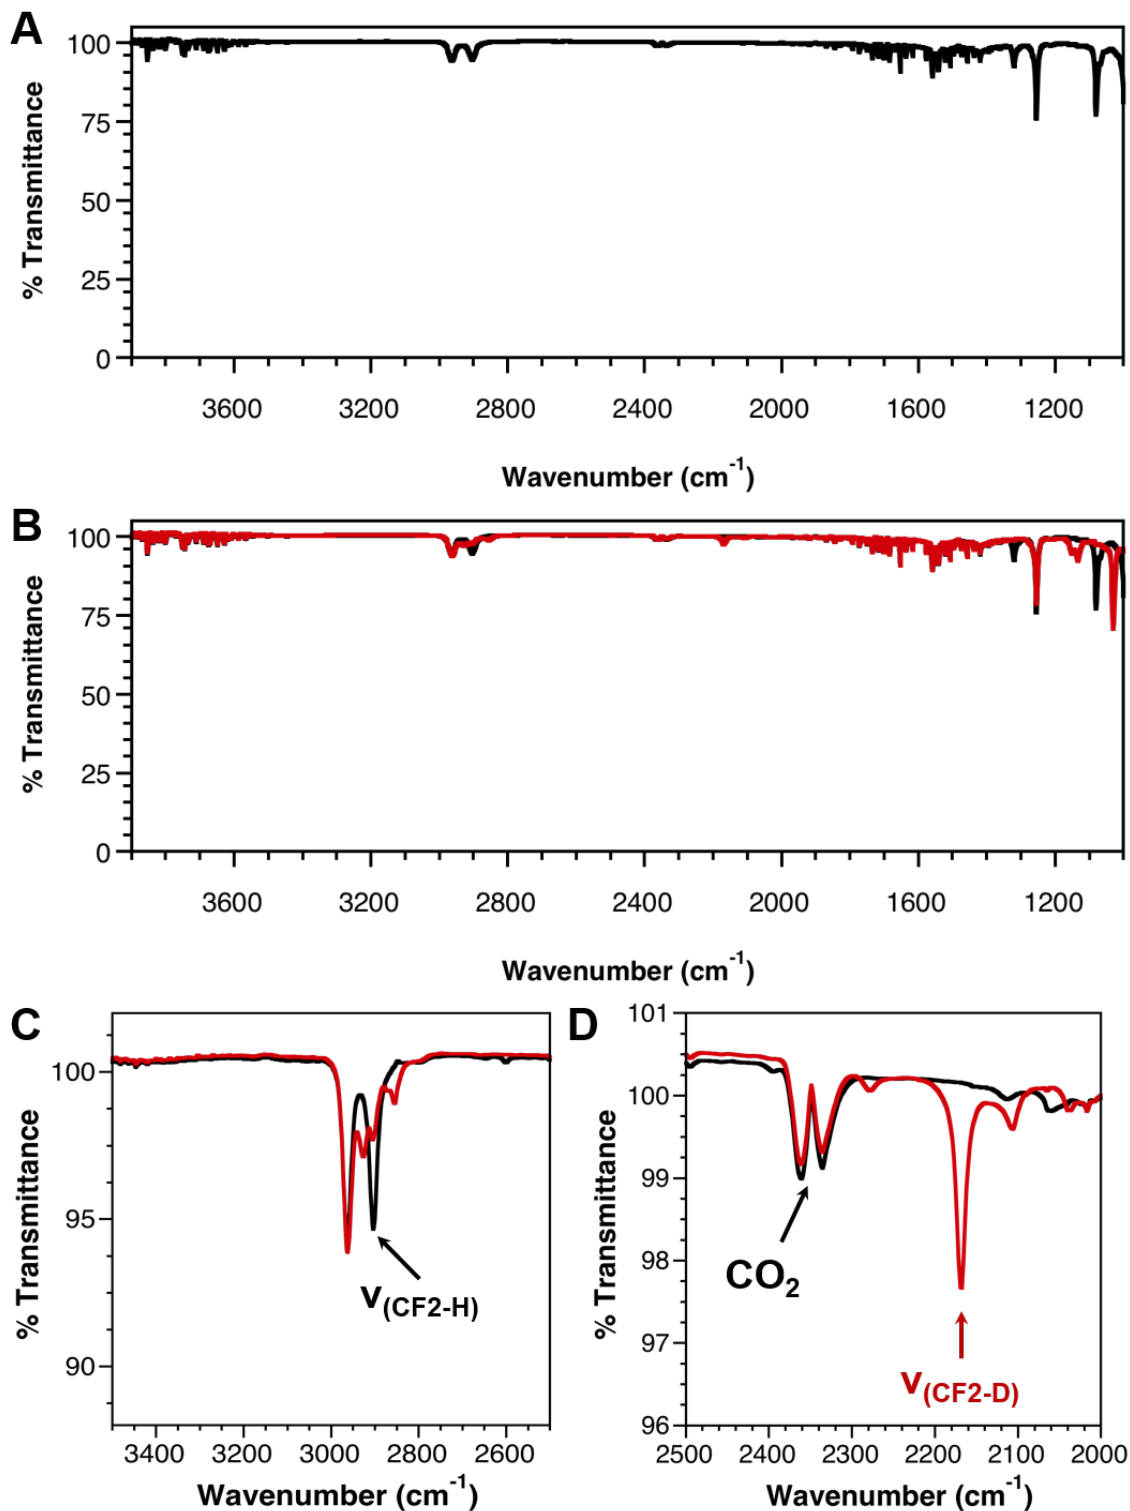

**Figure S4.** A) IR spectrum of  $\text{TMSCF}_2\text{H}$ . B) Superimposed IR spectra of  $\text{TMSCF}_2\text{H}$  (black) and  $\text{TMSCF}_2\text{D}$  (red). C) and D) Expansion of superimposed IR spectra of  $\text{TMSCF}_2\text{H}$  (black) and  $\text{TMSCF}_2\text{D}$  (red).



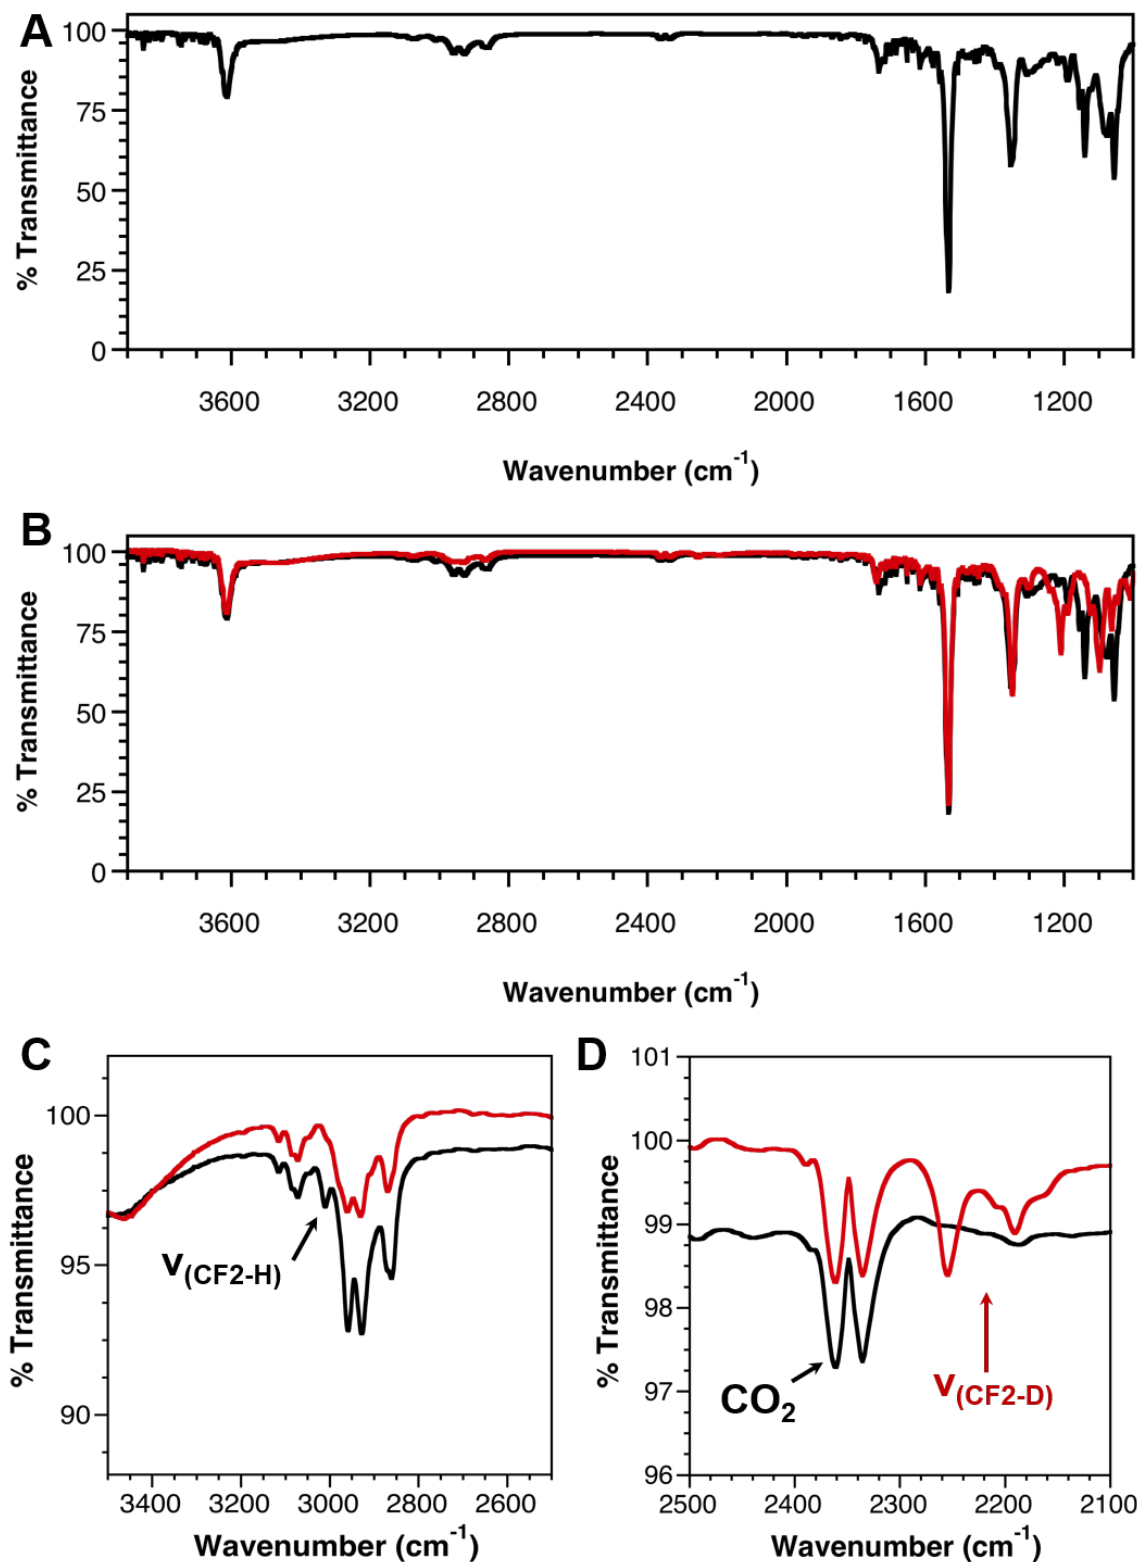

**Figure S5.** A) IR spectrum of 2,2-difluoro-1-(2-nitrophenyl)ethan-1-ol (**3-NO<sub>2</sub>**). B) Superimposed IR spectra of **3-NO<sub>2</sub>** (black) and **3-NO<sub>2</sub>-D** (red). C) and D) Expansion of superimposed IR spectra of **3-NO<sub>2</sub>** (black) and **3-NO<sub>2</sub>-D** (red).

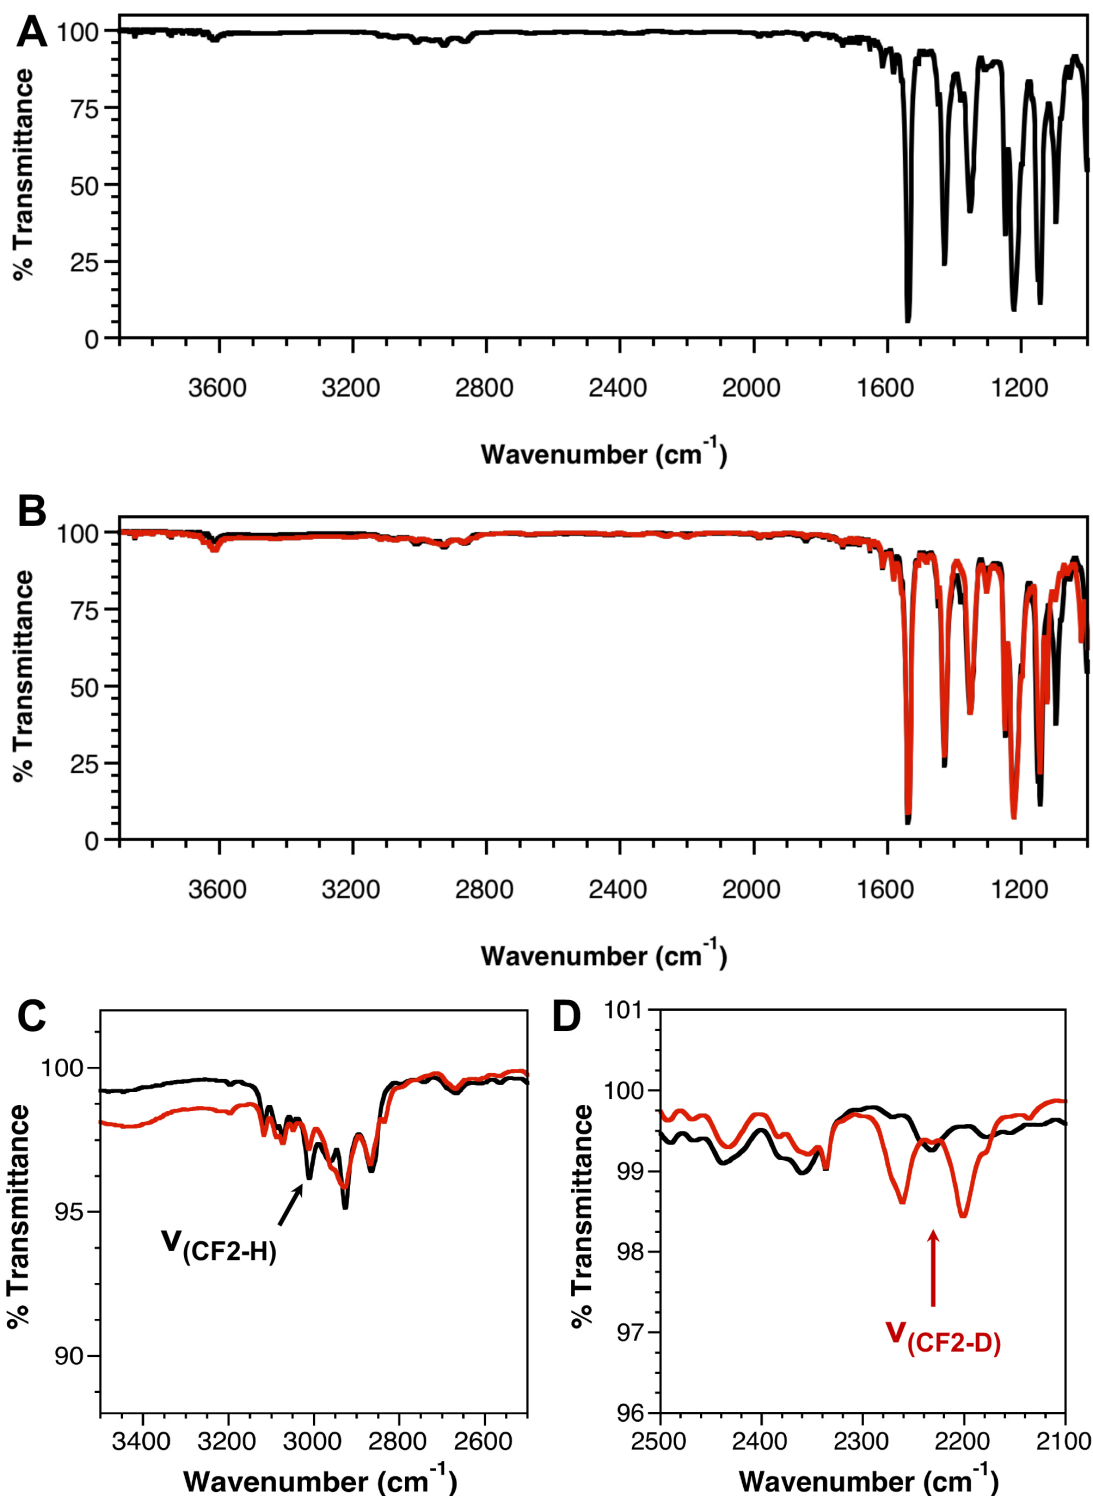

**Figure S6.** A) IR spectrum of 2,2-difluoro-1-(2-nitrophenyl)ethan-1-ol triflate (**4-NO<sub>2</sub>**). B) Superimposed IR spectra of **4-NO<sub>2</sub>** (black) and **4-NO<sub>2</sub>-D** (red). C) and D) Expansion of superimposed IR spectra of **4-NO<sub>2</sub>** (black) and **4-NO<sub>2</sub>-D** (red). The IR spectrum of **4-NO<sub>2</sub>** is complicated in the region from 2800 to 3200 cm<sup>-1</sup>; we tentatively assign the peak at 3008 cm<sup>-1</sup> to the CF<sub>2</sub>-H stretch. Peaks in the IR spectrum of the deuterated analogue **4-NO<sub>2</sub>-D** at 2260 and 2200 cm<sup>-1</sup> were attributed to CF<sub>2</sub>-D bond stretches. The two bands are most likely due to Fermi resonance.

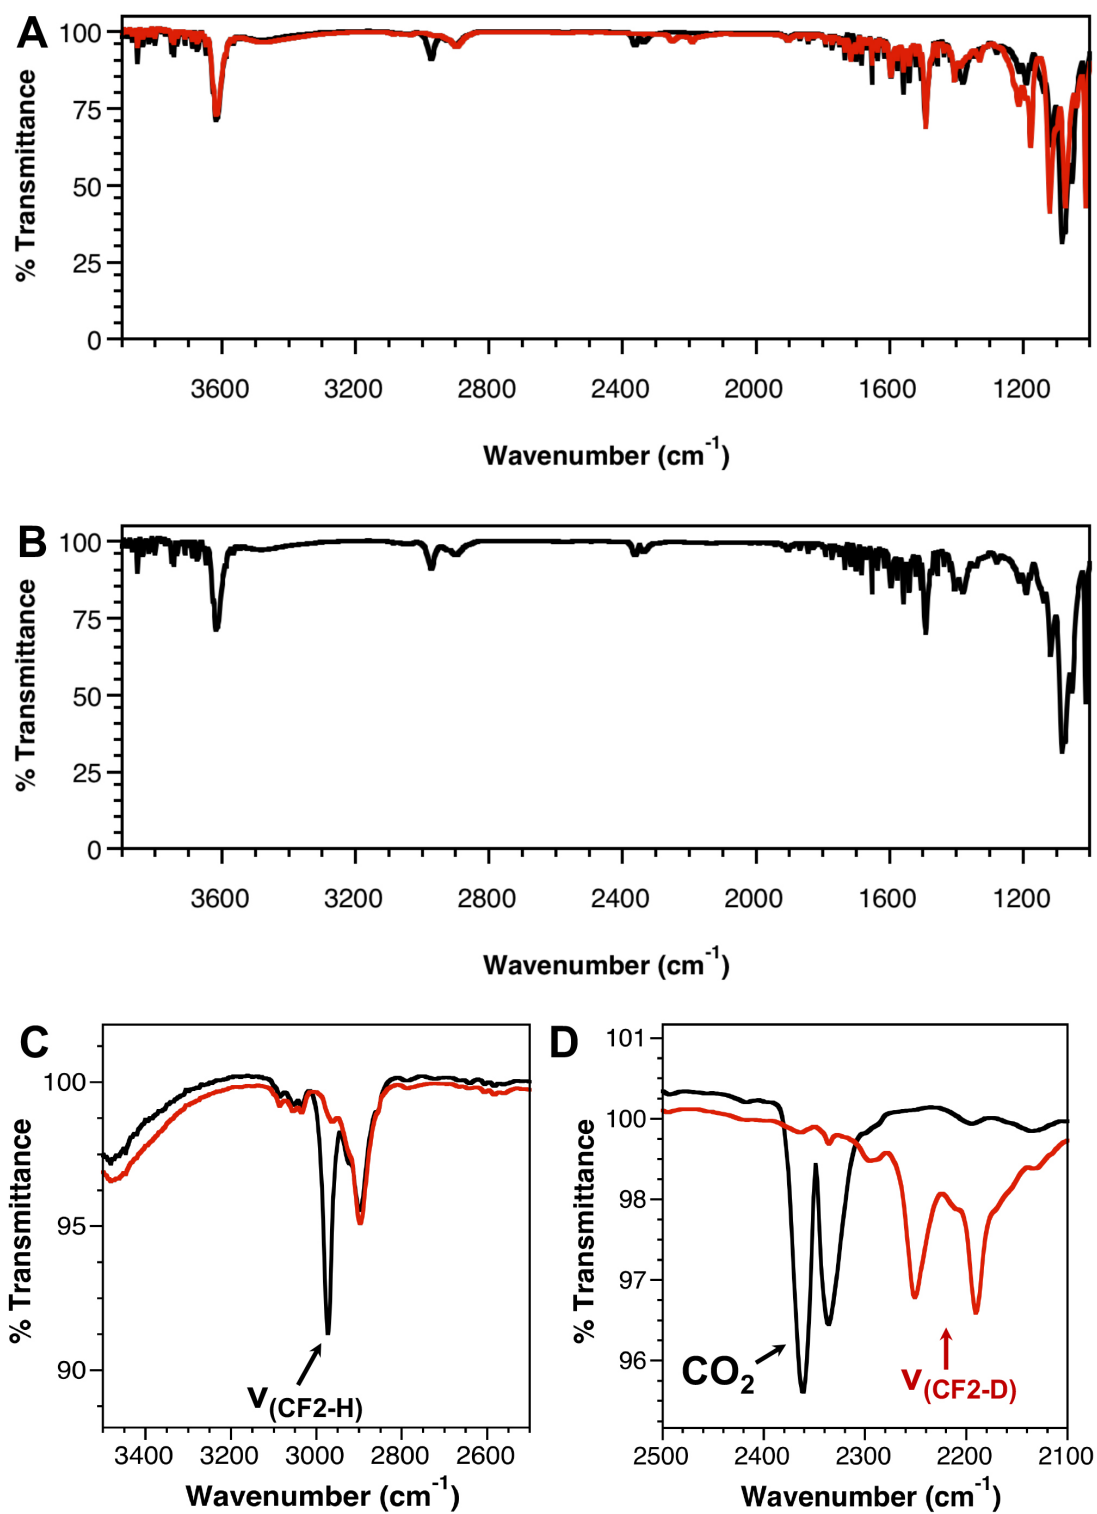

**Figure S7.** A) IR spectrum of 2,2-difluoro-1-(4-bromophenyl)ethan-1-ol (**3-Br**). B) Superimposed IR spectra of **3-Br** (black) and **3-Br-D** (red). C) and D) Expansion of superimposed IR spectra of **3-Br** (black) and **3-Br-D** (red).

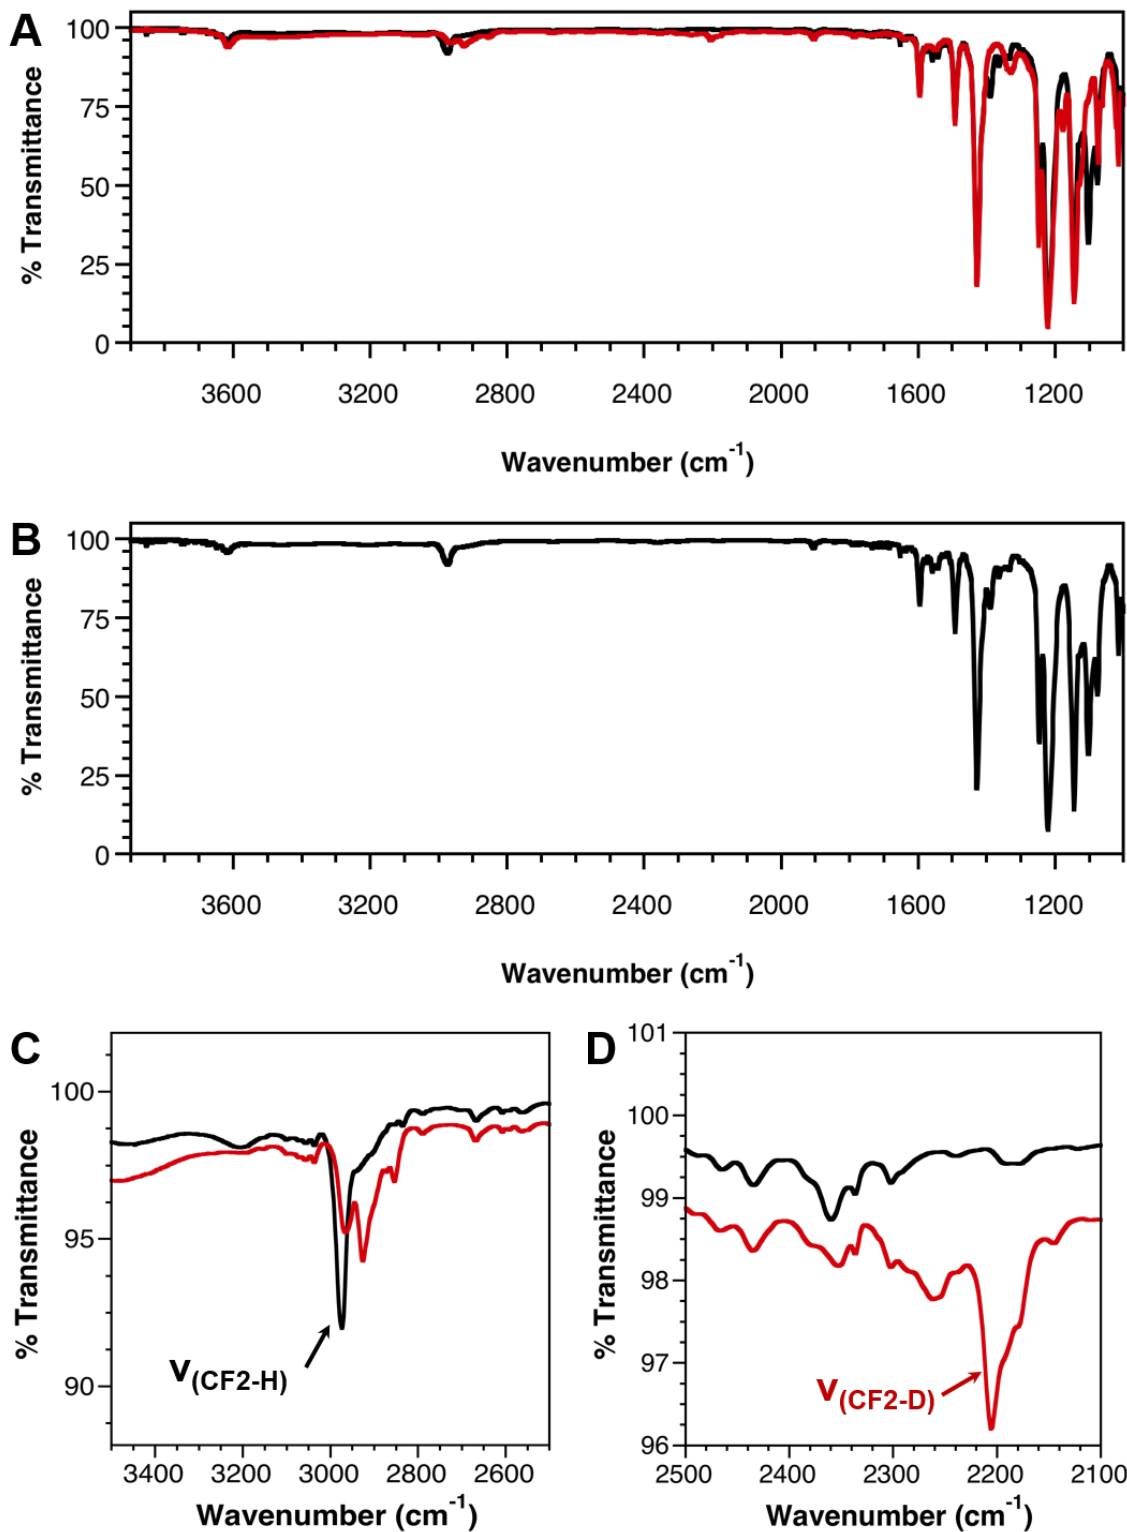

**Figure S8.** A) IR spectrum of 2,2-difluoro-1-(4-bromophenyl)ethan-1-ol triflate (**4-Br**). B) Superimposed IR spectra of **4-Br** (black) and **4-Br-D** (red). C) and D) Expansion of superimposed IR spectra of **4-Br** (black) and **4-Br-D** (red).

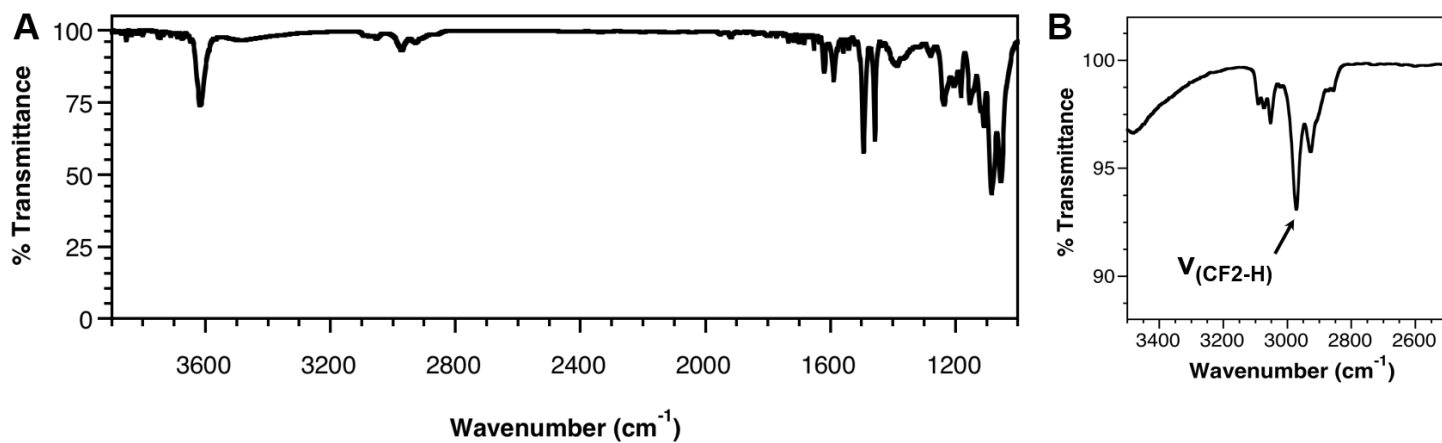

**Figure S9.** A) IR spectrum of 2,2-difluoro-1-(2-fluorophenyl)ethan-1-ol (**3-F**). B) Expansion of IR spectrum of **3-F**.

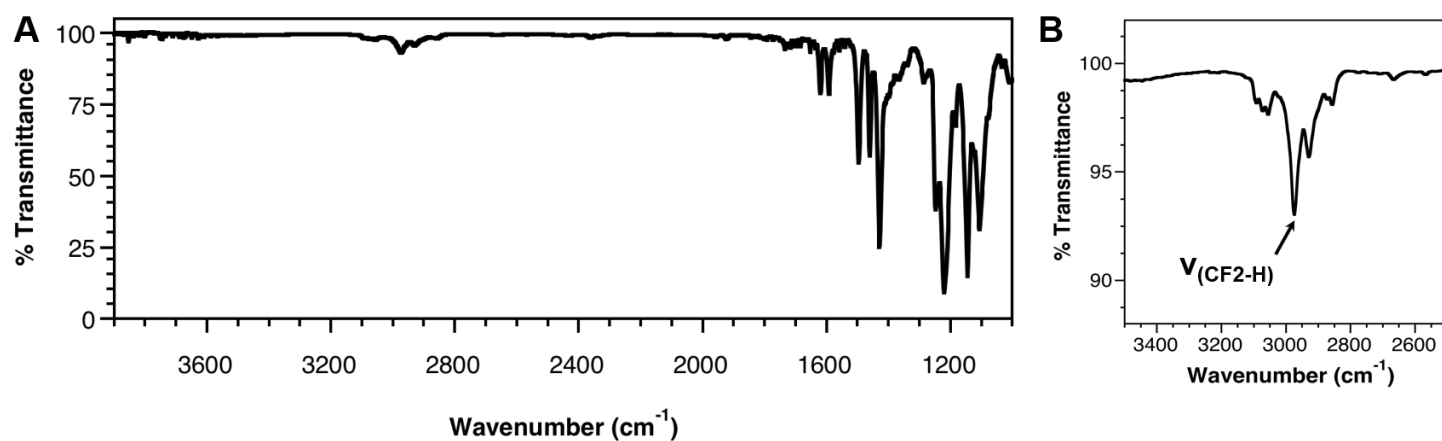

**Figure S10.** A) IR spectrum of 2,2-difluoro-1-(2-fluorophenyl)ethan-1-ol triflate (**4-F**). B) Expansion of IR spectrum of **4-F**.

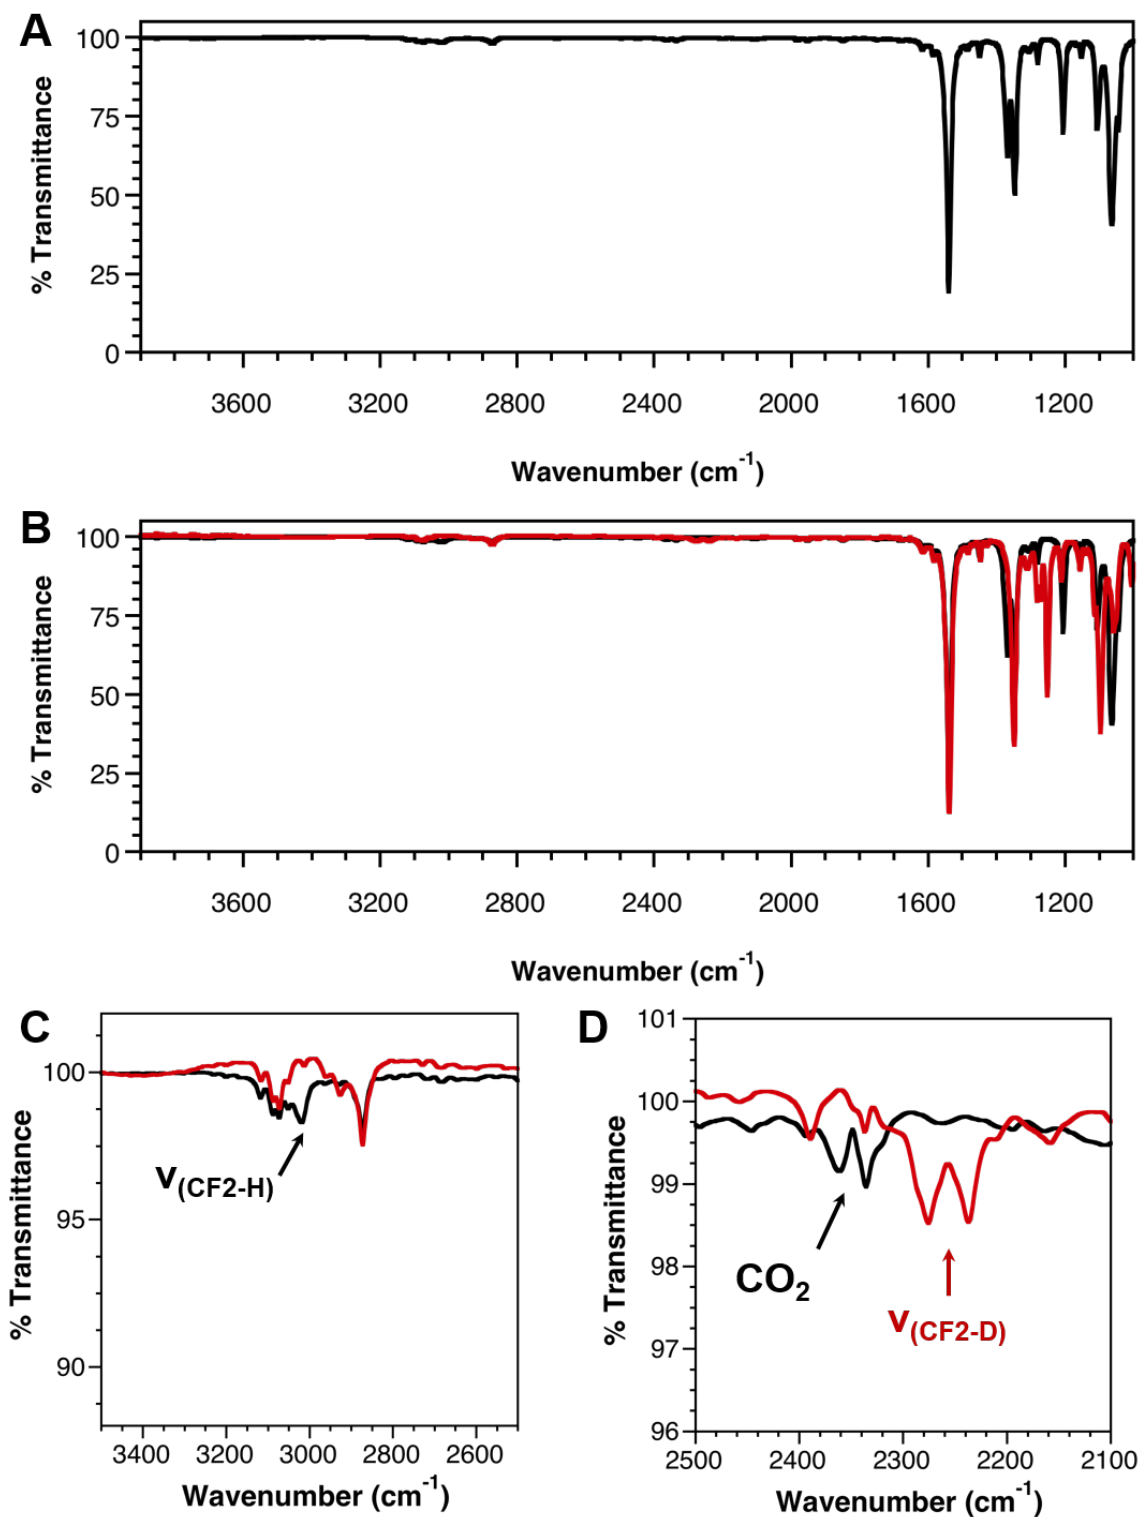

**Figure S11.** A) IR spectrum of *o*-nitro- $\alpha,\alpha$ -difluorotoluene (**1-CF<sub>2</sub>H**). B) Superimposed IR spectra of **1-CF<sub>2</sub>H** (black) and **1-CF<sub>2</sub>D** (red). C) and D) Expansion of superimposed IR spectra of **1-CF<sub>2</sub>H** (black) and **1-CF<sub>2</sub>D** (red). Peaks in the IR spectrum of the deuterated analogue **1-CF<sub>2</sub>D** at 2276 and 2237 cm<sup>-1</sup> were attributed to CF<sub>2</sub>-D bond stretches. The two bands are probably due to Fermi resonance.

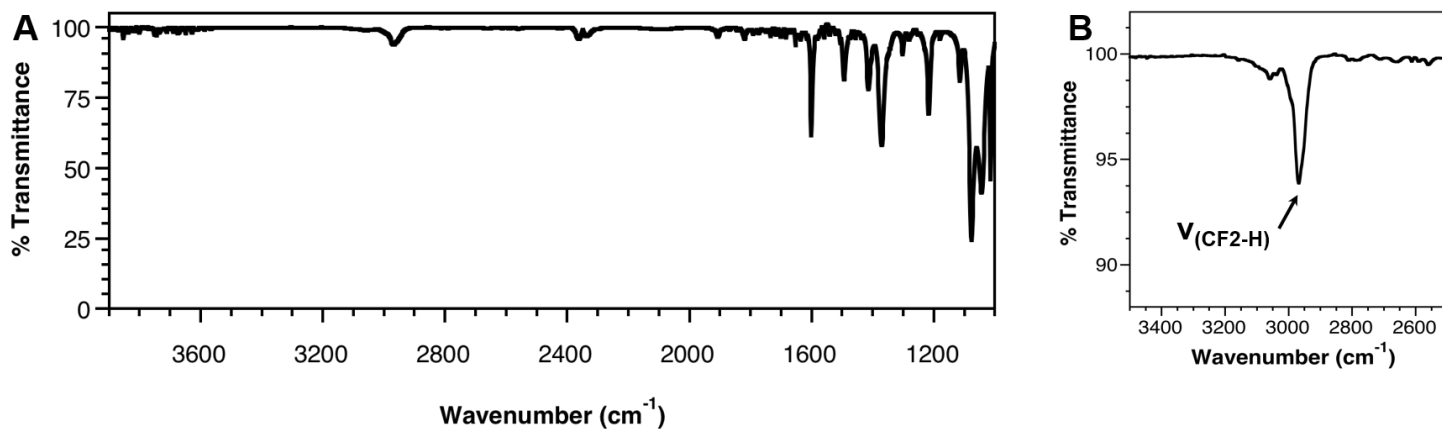

Figure S12. A) IR spectrum of *p*-bromo- $\alpha,\alpha$ -difluorotoluene (**2-CF<sub>2</sub>H**). B) Expansion of IR spectrum of **2-CF<sub>2</sub>H**.

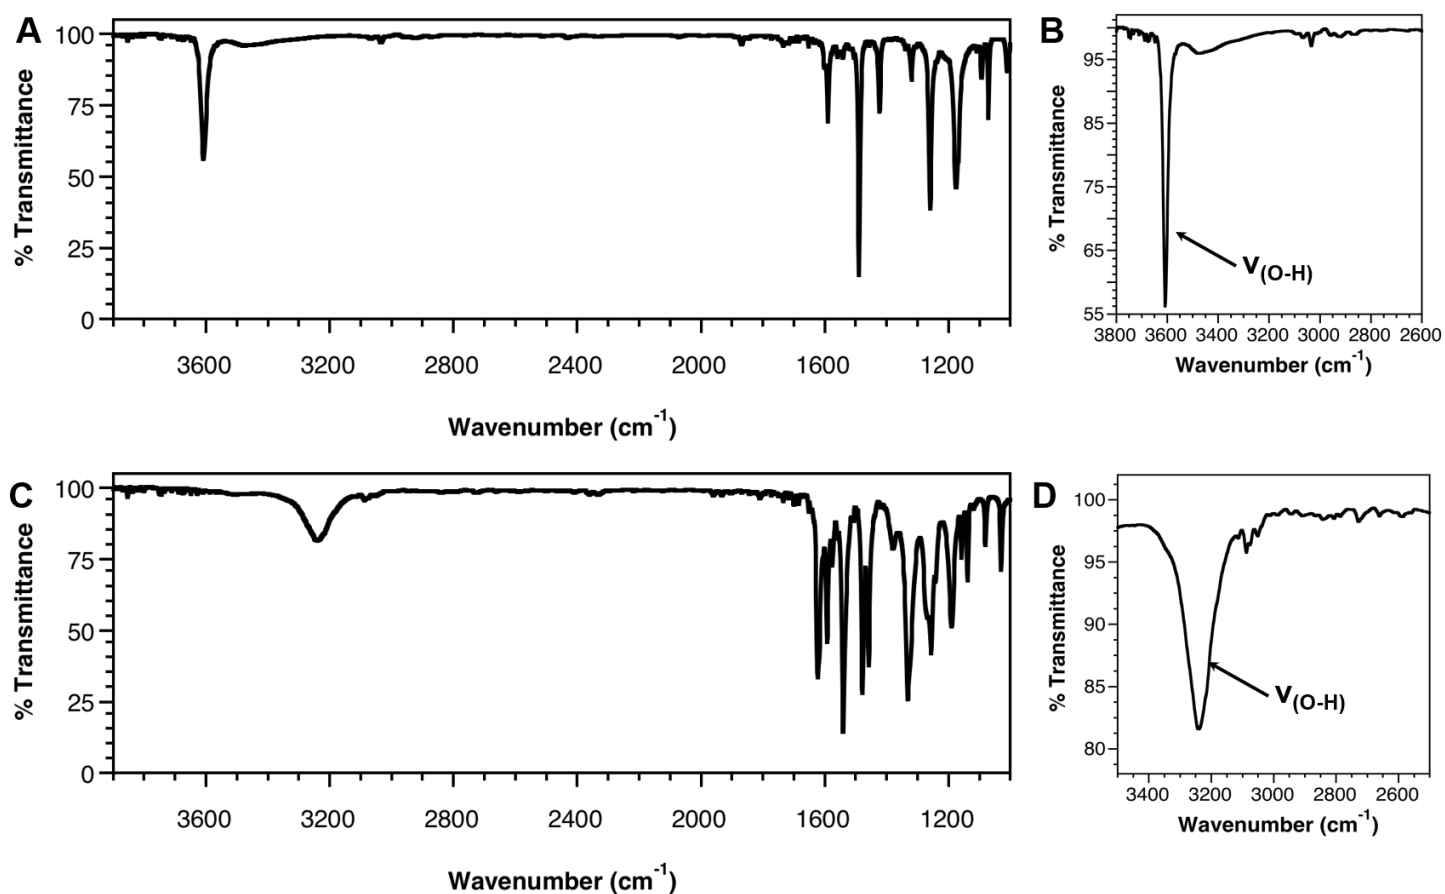

Figure S13. A) IR spectrum of *p*-bromophenol(**2-OH**). B) Expansion of IR spectrum of **2-OH**. C) IR spectrum of *o*-nitrophenol (**1-OH**). D) Expansion of IR spectrum of **1-OH**.

## 5. Theoretical Calculations

### 5.1. Potential Energy Surface Calculations and Conformational Distribution

The conformations of **4-NO<sub>2</sub>** are determined by four critical rotations  $\tau_1$ - $\tau_4$  (Figure S14). To identify the conformational distribution of **4-NO<sub>2</sub>**, two model compounds, 1-(2-nitrophenyl)-2,2,2-trifluoroethanol triflate and 1-(2-nitrophenyl)ethanol triflate, were chosen to generate potential energy surfaces (PESs) as a function of the  $\tau_1$  and  $\tau_2$  rotations. Because of the  $C_{3v}$  symmetry of the trifluoromethyl and methyl group, the PESs of these two molecules are independent of  $\tau_3$ . The rotations  $\tau_1$  and  $\tau_2$  were scanned from  $-180^\circ$  to  $+180^\circ$  with an increment of  $30^\circ$  of each step. The conformations generated were optimized at the PCM-B3LYP/6-31+G(d) level in  $CHCl_3$  using Gaussian 09.<sup>5</sup> The conformational distribution about  $\tau_1$  and  $\tau_2$  was obtained as a  $13 \times 13$  PES with 169 geometry optimizations. For both model compounds, four local minima were identified (Figures S15 and S16). The search of local minima of **4-NO<sub>2</sub>** was achieved by substituting the  $CF_3$  group with a  $CF_2H$  moiety. Further geometry optimization of these structures was performed at the PCM-B3LYP/6-31+G(d,p) level in  $CHCl_3$ , which led to very small geometric changes.

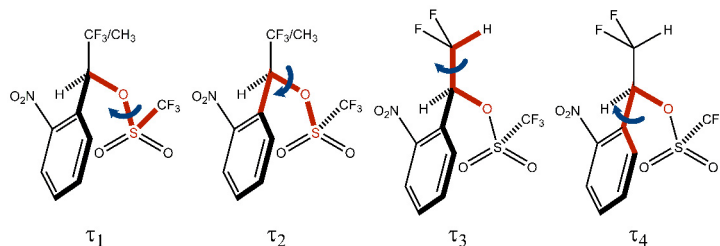

**Figure S14.** Critical rotations determining the conformations of **4-NO<sub>2</sub>**.

In addition to the  $\tau_1$  and  $\tau_2$  rotations, two more rotations,  $\tau_3$  and  $\tau_4$ , were also considered because they govern the formation of intramolecular H-bonding (Figure S14). As such, each local minimum on the PES corresponds to  $3 \times 2 = 6$  conformers and, overall, 24 conformers were identified for **4-NO<sub>2</sub>** at the PCM-B3LYP/6-31+G(d,p) level of theory in  $CHCl_3$ . Similarly, 12 and 24 conformers were found for **4-Br** and **4-F**, respectively.

#### 5.1.1. 1-(2-Nitrophenyl)-2,2,2-trifluoroethanol Triflate

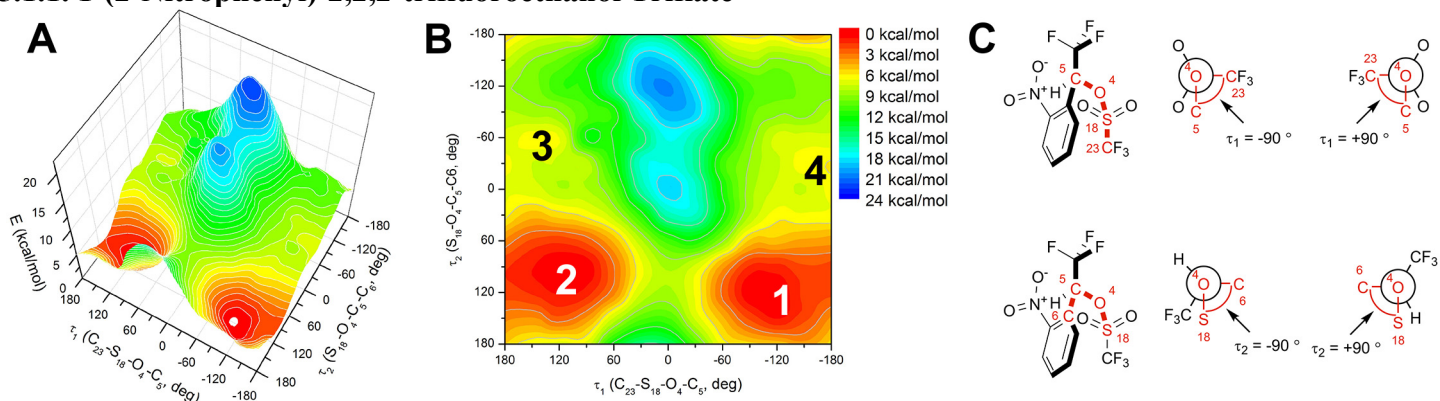

**Figure S15.** A) 3D-PES of 1-(2-nitrophenyl)-2,2,2-trifluoroethanol triflate. B) Contour map of PES of 1-(2-nitrophenyl)-2,2,2-trifluoroethanol triflate. C) Definition of the value of  $\tau_1$  and  $\tau_2$ .



**Table S1.** Conformers and energy of 1-(2-nitrophenyl)-2,2,2-trifluoroethanol triflate due to the rotations of  $\tau_1$  and  $\tau_2$  at the B3LYP/6-31+G(d) level of theory in the gas phase.

| Conformer | $\tau_1$ | $\tau_2$ | Energy (hartree) | Relative Energy (kcal/mol) |
|-----------|----------|----------|------------------|----------------------------|
| 1         | -180     | -180     | -1773.954430     | 5.7                        |
| 2         | -150     | -180     | -1773.956956     | 4.1                        |
| 3         | -120     | -180     | -1773.954207     | 5.8                        |
| 4         | -90      | -180     | -1773.954631     | 5.5                        |
| 5         | -60      | -180     | -1773.953092     | 6.5                        |
| 6         | -30      | -180     | -1773.946659     | 10.5                       |
| 7         | 0        | -180     | -1773.940325     | 14.5                       |
| 8         | 30       | -180     | -1773.939514     | 15.0                       |
| 9         | 60       | -180     | -1773.943704     | 12.4                       |
| 10        | 90       | -180     | -1773.952119     | 7.1                        |
| 11        | 120      | -180     | -1773.95194      | 7.2                        |
| 12        | 150      | -180     | -1773.952763     | 6.7                        |
| 13        | 180      | -180     | -1773.955271     | 5.1                        |
| 14        | -180     | -150     | -1773.951265     | 7.7                        |
| 15        | -150     | -150     | -1773.949538     | 8.7                        |
| 16        | -120     | -150     | -1773.948832     | 9.2                        |
| 17        | -90      | -150     | -1773.950176     | 8.3                        |
| 18        | -60      | -150     | -1773.947543     | 10.0                       |
| 19        | -30      | -150     | -1773.939266     | 15.2                       |
| 20        | 0        | -150     | -1773.934136     | 18.4                       |
| 21        | 30       | -150     | -1773.933474     | 18.8                       |
| 22        | 60       | -150     | -1773.941371     | 13.9                       |
| 23        | 90       | -150     | -1773.944964     | 11.6                       |
| 24        | 120      | -150     | -1773.947716     | 9.9                        |
| 25        | 150      | -150     | -1773.949063     | 9.0                        |
| 26        | 180      | -150     | -1773.951559     | 7.5                        |
| 27        | -180     | -120     | -1773.948285     | 9.5                        |
| 28        | -150     | -120     | -1773.948281     | 9.5                        |
| 29        | -120     | -120     | -1773.947202     | 10.2                       |
| 30        | -90      | -120     | -1773.946529     | 10.6                       |
| 31        | -60      | -120     | -1773.942267     | 13.3                       |
| 32        | -30      | -120     | -1773.934818     | 18.0                       |
| 33        | 0        | -120     | -1773.930970     | 20.4                       |
| 34        | 30       | -120     | -1773.932517     | 19.4                       |
| 35        | 60       | -120     | -1773.939452     | 15.1                       |
| 36        | 90       | -120     | -1773.944915     | 11.6                       |
| 37        | 120      | -120     | -1773.945780     | 11.1                       |
| 38        | 150      | -120     | -1773.948464     | 9.4                        |
| 39        | 180      | -120     | -1773.949243     | 8.9                        |
| 40        | -180     | -90      | -1773.950552     | 8.1                        |
| 41        | -150     | -90      | -1773.948532     | 9.4                        |
| 42        | -120     | -90      | -1773.948787     | 9.2                        |
| 43        | -90      | -90      | -1773.947245     | 10.2                       |
| 44        | -60      | -90      | -1773.940200     | 14.6                       |
| 45        | -30      | -90      | -1773.933626     | 18.7                       |

|    |      |     |              |      |
|----|------|-----|--------------|------|
| 46 | 0    | -90 | -1773.932493 | 19.4 |
| 47 | 30   | -90 | -1773.936722 | 16.8 |
| 48 | 60   | -90 | -1773.945055 | 11.6 |
| 49 | 90   | -90 | -1773.946855 | 10.4 |
| 50 | 120  | -90 | -1773.949172 | 9.0  |
| 51 | 150  | -90 | -1773.949787 | 8.6  |
| 52 | 180  | -90 | -1773.950439 | 8.2  |
| 53 | -180 | -60 | -1773.951809 | 7.3  |
| 54 | -150 | -60 | -1773.951950 | 7.2  |
| 55 | -120 | -60 | -1773.951877 | 7.3  |
| 56 | -90  | -60 | -1773.948338 | 9.5  |
| 57 | -60  | -60 | -1773.942883 | 12.9 |
| 58 | -30  | -60 | -1773.938209 | 15.8 |
| 59 | 0    | -60 | -1773.935795 | 17.4 |
| 60 | 30   | -60 | -1773.940390 | 14.5 |
| 61 | 60   | -60 | -1773.944141 | 12.1 |
| 62 | 90   | -60 | -1773.944141 | 12.1 |
| 63 | 120  | -60 | -1773.952768 | 6.7  |
| 64 | 150  | -60 | -1773.953185 | 6.5  |
| 65 | 180  | -60 | -1773.951953 | 7.2  |
| 66 | -180 | -30 | -1773.954054 | 5.9  |
| 67 | -150 | -30 | -1773.953389 | 6.3  |
| 68 | -120 | -30 | -1773.951283 | 7.6  |
| 69 | -90  | -30 | -1773.949235 | 8.9  |
| 70 | -60  | -30 | -1773.946125 | 10.9 |
| 71 | -30  | -30 | -1773.938765 | 15.5 |
| 72 | 0    | -30 | -1773.935972 | 17.3 |
| 73 | 30   | -30 | -1773.936845 | 16.7 |
| 74 | 60   | -30 | -1773.944938 | 11.6 |
| 75 | 90   | -30 | -1773.950917 | 7.9  |
| 76 | 120  | -30 | -1773.951231 | 7.7  |
| 77 | 150  | -30 | -1773.951500 | 7.5  |
| 78 | 180  | -30 | -1773.953025 | 6.6  |
| 79 | -180 | 0   | -1773.953195 | 6.4  |
| 80 | -150 | 0   | -1773.951407 | 7.6  |
| 81 | -120 | 0   | -1773.951797 | 7.3  |
| 82 | -90  | 0   | -1773.949738 | 8.6  |
| 83 | -60  | 0   | -1773.944600 | 11.8 |
| 84 | -30  | 0   | -1773.937035 | 16.6 |
| 85 | 0    | 0   | -1773.933711 | 18.7 |
| 86 | 30   | 0   | -1773.938503 | 15.7 |
| 87 | 60   | 0   | -1773.947402 | 10.1 |
| 88 | 90   | 0   | -1773.950377 | 8.2  |
| 89 | 120  | 0   | -1773.950406 | 8.2  |
| 90 | 150  | 0   | -1773.952055 | 7.2  |
| 91 | 180  | 0   | -1773.952419 | 6.9  |
| 92 | -180 | 30  | -1773.953072 | 6.5  |

|     |      |     |              |      |
|-----|------|-----|--------------|------|
| 93  | -150 | 30  | -1773.952902 | 6.6  |
| 94  | -120 | 30  | -1773.953353 | 6.3  |
| 95  | -90  | 30  | -1773.950371 | 8.2  |
| 96  | -60  | 30  | -1773.944191 | 12.1 |
| 97  | -30  | 30  | -1773.937312 | 16.4 |
| 98  | 0    | 30  | -1773.937873 | 16.1 |
| 99  | 30   | 30  | -1773.945210 | 11.5 |
| 100 | 60   | 30  | -1773.950672 | 8.0  |
| 101 | 90   | 30  | -1773.953428 | 6.3  |
| 102 | 120  | 30  | -1773.954511 | 5.6  |
| 103 | 150  | 30  | -1773.955744 | 4.8  |
| 104 | 180  | 30  | -1773.953373 | 6.3  |
| 105 | -180 | 60  | -1773.957001 | 4.1  |
| 106 | -150 | 60  | -1773.956605 | 4.3  |
| 107 | -120 | 60  | -1773.955654 | 4.9  |
| 108 | -90  | 60  | -1773.955369 | 5.1  |
| 109 | -60  | 60  | -1773.949007 | 9.1  |
| 110 | -30  | 60  | -1773.944616 | 11.8 |
| 111 | 0    | 60  | -1773.946157 | 10.9 |
| 112 | 30   | 60  | -1773.950597 | 8.1  |
| 113 | 60   | 60  | -1773.955987 | 4.7  |
| 114 | 90   | 60  | -1773.959452 | 2.5  |
| 115 | 120  | 60  | -1773.960737 | 1.7  |
| 116 | 150  | 60  | -1773.960121 | 2.1  |
| 117 | 180  | 60  | -1773.957721 | 3.6  |
| 118 | -180 | 90  | -1773.960310 | 2.0  |
| 119 | -150 | 90  | -1773.960079 | 2.1  |
| 120 | -120 | 90  | -1773.961526 | 1.2  |
| 121 | -90  | 90  | -1773.961307 | 1.4  |
| 122 | -60  | 90  | -1773.956995 | 4.1  |
| 123 | -30  | 90  | -1773.951909 | 7.3  |
| 124 | 0    | 90  | -1773.950024 | 8.4  |
| 125 | 30   | 90  | -1773.953012 | 6.6  |
| 126 | 60   | 90  | -1773.958747 | 3.0  |
| 127 | 90   | 90  | -1773.963132 | 0.2  |
| 128 | 120  | 90  | -1773.963467 | 0.0  |
| 129 | 150  | 90  | -1773.962203 | 0.8  |
| 130 | 180  | 90  | -1773.960855 | 1.6  |
| 131 | -180 | 120 | -1773.960166 | 2.1  |
| 132 | -150 | 120 | -1773.960839 | 1.6  |
| 133 | -120 | 120 | -1773.963129 | 0.2  |
| 134 | -90  | 120 | -1773.963268 | 0.1  |
| 135 | -60  | 120 | -1773.958986 | 2.8  |
| 136 | -30  | 120 | -1773.952916 | 6.6  |
| 137 | 0    | 120 | -1773.949984 | 8.5  |
| 138 | 30   | 120 | -1773.951588 | 7.5  |
| 139 | 60   | 120 | -1773.957941 | 3.5  |

|     |      |     |              |      |
|-----|------|-----|--------------|------|
| 140 | 90   | 120 | -1773.961686 | 1.1  |
| 141 | 120  | 120 | -1773.962409 | 0.7  |
| 142 | 150  | 120 | -1773.961259 | 1.4  |
| 143 | 180  | 120 | -1773.960456 | 1.9  |
| 144 | -180 | 150 | -1773.957194 | 3.9  |
| 145 | -150 | 150 | -1773.960307 | 2.0  |
| 146 | -120 | 150 | -1773.962352 | 0.7  |
| 147 | -90  | 150 | -1773.960159 | 2.1  |
| 148 | -60  | 150 | -1773.956003 | 4.7  |
| 149 | -30  | 150 | -1773.951773 | 7.3  |
| 150 | 0    | 150 | -1773.946634 | 10.6 |
| 151 | 30   | 150 | -1773.947149 | 10.2 |
| 152 | 60   | 150 | -1773.951365 | 7.6  |
| 153 | 90   | 150 | -1773.957210 | 3.9  |
| 154 | 120  | 150 | -1773.959511 | 2.5  |
| 155 | 150  | 150 | -1773.957349 | 3.8  |
| 156 | 180  | 150 | -1773.957919 | 3.5  |
| 157 | -180 | 180 | -1773.954430 | 5.7  |
| 158 | -150 | 180 | -1773.956956 | 4.1  |
| 159 | -120 | 180 | -1773.955252 | 5.2  |
| 160 | -90  | 180 | -1773.954631 | 5.5  |
| 161 | -60  | 180 | -1773.953092 | 6.5  |
| 162 | -30  | 180 | -1773.946659 | 10.5 |
| 163 | 0    | 180 | -1773.940325 | 14.5 |
| 164 | 30   | 180 | -1773.939514 | 15.0 |
| 165 | 60   | 180 | -1773.943704 | 12.4 |
| 166 | 90   | 180 | -1773.952120 | 7.1  |
| 167 | 120  | 180 | -1773.951941 | 7.2  |
| 168 | 150  | 180 | -1773.952763 | 6.7  |
| 169 | 180  | 180 | -1773.955270 | 5.1  |

### 5.1.2. 1-(2-Nitrophenyl)ethanol Triflate

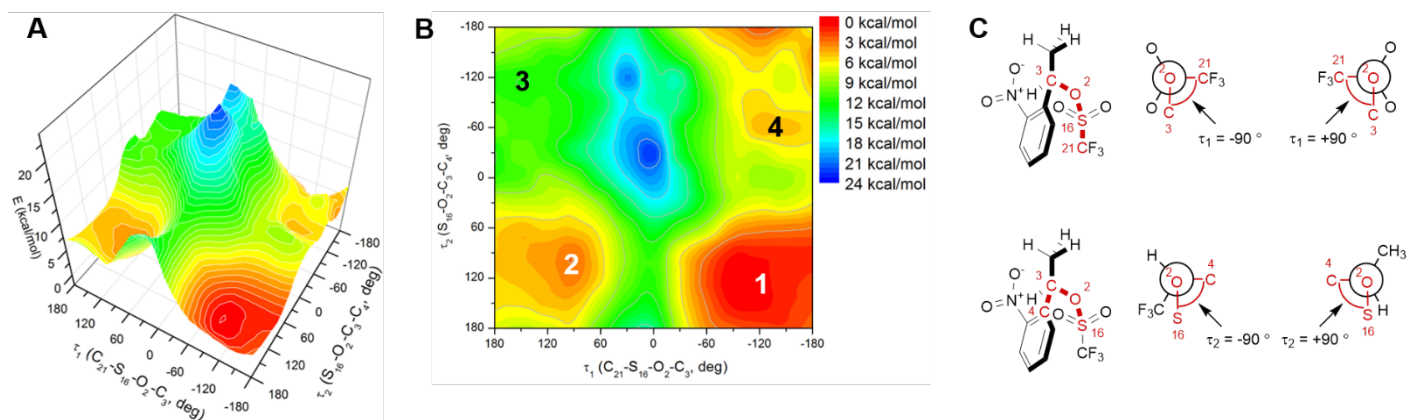

**Figure S16.** A) 3D-PES of 1-(2-nitrophenyl)ethanol triflate. B) Contour map of PES of 1-(2-nitrophenyl)ethanol triflate. C) Definition of the value of  $\tau_1$  and  $\tau_2$ .

**Table S2.** Conformers of 1-(2-nitrophenyl)-2,2,2-trifluoroethanol triflate due to the rotations of  $\tau_1$  and  $\tau_2$  at the B3LYP/6-31+G(d) level of theory in the gas phase.

| Conformer | $\tau_1$ | $\tau_2$ | Energy (hartree) | Relative Energy (kcal/mol) |
|-----------|----------|----------|------------------|----------------------------|
| 1         | -180     | -180     | -1476.223423     | 6.9                        |
| 2         | -150     | -180     | -1476.228592     | 3.6                        |
| 3         | -120     | -180     | -1476.231242     | 2.0                        |
| 4         | -90      | -180     | -1476.228125     | 3.9                        |
| 5         | -60      | -180     | -1476.226154     | 5.2                        |
| 6         | -30      | -180     | -1476.222149     | 7.7                        |
| 7         | 0        | -180     | -1476.216475     | 11.2                       |
| 8         | 30       | -180     | -1476.209385     | 15.7                       |
| 9         | 60       | -180     | -1476.215635     | 11.8                       |
| 10        | 90       | -180     | -1476.222620     | 7.4                        |
| 11        | 120      | -180     | -1476.222752     | 7.3                        |
| 12        | 150      | -180     | -1476.221730     | 7.9                        |
| 13        | 180      | -180     | -1476.223423     | 6.9                        |
| 14        | -180     | -150     | -1476.228121     | 3.9                        |
| 15        | -150     | -150     | -1476.224489     | 6.2                        |
| 16        | -120     | -150     | -1476.226592     | 4.9                        |
| 17        | -90      | -150     | -1476.224795     | 6.0                        |
| 18        | -60      | -150     | -1476.222547     | 7.4                        |
| 19        | -30      | -150     | -1476.216920     | 11.0                       |
| 20        | 0        | -150     | -1476.211864     | 14.1                       |
| 21        | 30       | -150     | -1476.205804     | 17.9                       |
| 22        | 60       | -150     | -1476.210945     | 14.7                       |
| 23        | 90       | -150     | -1476.216570     | 11.2                       |
| 24        | 120      | -150     | -1476.216914     | 11.0                       |
| 25        | 150      | -150     | -1476.219040     | 9.6                        |
| 26        | 180      | -150     | -1476.220404     | 8.8                        |
| 27        | -180     | -120     | -1476.227336     | 4.4                        |
| 28        | -150     | -120     | -1476.222571     | 7.4                        |
| 29        | -120     | -120     | -1476.224617     | 6.1                        |
| 30        | -90      | -120     | -1476.223705     | 6.7                        |
| 31        | -60      | -120     | -1476.219026     | 9.6                        |
| 32        | -30      | -120     | -1476.209519     | 15.6                       |
| 33        | 0        | -120     | -1476.209701     | 15.5                       |
| 34        | 30       | -120     | -1476.201807     | 20.4                       |
| 35        | 60       | -120     | -1476.210231     | 15.2                       |
| 36        | 90       | -120     | -1476.213426     | 13.2                       |
| 37        | 120      | -120     | -1476.215943     | 11.6                       |
| 38        | 150      | -120     | -1476.215206     | 12.0                       |
| 39        | 180      | -120     | -1476.215833     | 11.6                       |
| 40        | -180     | -90      | -1476.224712     | 6.1                        |
| 41        | -150     | -90      | -1476.224163     | 6.4                        |
| 42        | -120     | -90      | -1476.225504     | 5.6                        |
| 43        | -90      | -90      | -1476.223796     | 6.6                        |
| 44        | -60      | -90      | -1476.217153     | 10.8                       |
| 45        | -30      | -90      | -1476.210859     | 14.8                       |

|    |      |     |              |      |
|----|------|-----|--------------|------|
| 46 | 0    | -90 | -1476.209029 | 15.9 |
| 47 | 30   | -90 | -1476.205718 | 18.0 |
| 48 | 60   | -90 | -1476.212471 | 13.8 |
| 49 | 90   | -90 | -1476.214955 | 12.2 |
| 50 | 120  | -90 | -1476.216548 | 11.2 |
| 51 | 150  | -90 | -1476.216428 | 11.3 |
| 52 | 180  | -90 | -1476.217038 | 10.9 |
| 53 | -180 | -60 | -1476.225950 | 5.3  |
| 54 | -150 | -60 | -1476.226446 | 5.0  |
| 55 | -120 | -60 | -1476.226713 | 4.8  |
| 56 | -90  | -60 | -1476.222529 | 7.4  |
| 57 | -60  | -60 | -1476.218315 | 10.1 |
| 58 | -30  | -60 | -1476.214191 | 12.7 |
| 59 | 0    | -60 | -1476.203507 | 19.4 |
| 60 | 30   | -60 | -1476.203857 | 19.2 |
| 61 | 60   | -60 | -1476.210068 | 15.3 |
| 62 | 90   | -60 | -1476.214858 | 12.3 |
| 63 | 120  | -60 | -1476.216525 | 11.2 |
| 64 | 150  | -60 | -1476.217028 | 10.9 |
| 65 | 180  | -60 | -1476.218511 | 10.0 |
| 66 | -180 | -30 | -1476.224080 | 6.5  |
| 67 | -150 | -30 | -1476.224136 | 6.4  |
| 68 | -120 | -30 | -1476.222346 | 7.6  |
| 69 | -90  | -30 | -1476.222265 | 7.6  |
| 70 | -60  | -30 | -1476.218499 | 10.0 |
| 71 | -30  | -30 | -1476.212653 | 13.6 |
| 72 | 0    | -30 | -1476.198957 | 22.2 |
| 73 | 30   | -30 | -1476.203316 | 19.5 |
| 74 | 60   | -30 | -1476.208288 | 16.4 |
| 75 | 90   | -30 | -1476.212039 | 14.0 |
| 76 | 120  | -30 | -1476.216558 | 11.2 |
| 77 | 150  | -30 | -1476.218646 | 9.9  |
| 78 | 180  | -30 | -1476.215178 | 12.1 |
| 79 | -180 | 0   | -1476.223092 | 7.1  |
| 80 | -150 | 0   | -1476.220664 | 8.6  |
| 81 | -120 | 0   | -1476.220423 | 8.8  |
| 82 | -90  | 0   | -1476.222332 | 7.6  |
| 83 | -60  | 0   | -1476.216924 | 11.0 |
| 84 | -30  | 0   | -1476.208584 | 16.2 |
| 85 | 0    | 0   | -1476.202311 | 20.1 |
| 86 | 30   | 0   | -1476.205689 | 18.0 |
| 87 | 60   | 0   | -1476.211837 | 14.2 |
| 88 | 90   | 0   | -1476.218403 | 10.0 |
| 89 | 120  | 0   | -1476.220485 | 8.7  |
| 90 | 150  | 0   | -1476.217490 | 10.6 |
| 91 | 180  | 0   | -1476.216594 | 11.2 |
| 92 | -180 | 30  | -1476.224766 | 6.0  |

|     |      |     |              |      |
|-----|------|-----|--------------|------|
| 93  | -150 | 30  | -1476.222912 | 7.2  |
| 94  | -120 | 30  | -1476.223599 | 6.8  |
| 95  | -90  | 30  | -1476.221878 | 7.9  |
| 96  | -60  | 30  | -1476.215832 | 11.6 |
| 97  | -30  | 30  | -1476.209310 | 15.7 |
| 98  | 0    | 30  | -1476.206566 | 17.5 |
| 99  | 30   | 30  | -1476.211902 | 14.1 |
| 100 | 60   | 30  | -1476.219577 | 9.3  |
| 101 | 90   | 30  | -1476.223294 | 7.0  |
| 102 | 120  | 30  | -1476.222044 | 7.7  |
| 103 | 150  | 30  | -1476.221959 | 7.8  |
| 104 | 180  | 30  | -1476.222544 | 7.4  |
| 105 | -180 | 60  | -1476.229664 | 3.0  |
| 106 | -150 | 60  | -1476.229111 | 3.3  |
| 107 | -120 | 60  | -1476.228866 | 3.5  |
| 108 | -90  | 60  | -1476.22738  | 4.4  |
| 109 | -60  | 60  | -1476.221304 | 8.2  |
| 110 | -30  | 60  | -1476.217344 | 10.7 |
| 111 | 0    | 60  | -1476.212822 | 13.5 |
| 112 | 30   | 60  | -1476.217938 | 10.3 |
| 113 | 60   | 60  | -1476.223658 | 6.7  |
| 114 | 90   | 60  | -1476.225918 | 5.3  |
| 115 | 120  | 60  | -1476.225855 | 5.4  |
| 116 | 150  | 60  | -1476.226690 | 4.8  |
| 117 | 180  | 60  | -1476.225446 | 5.6  |
| 118 | -180 | 90  | -1476.232470 | 1.2  |
| 119 | -150 | 90  | -1476.232574 | 1.1  |
| 120 | -120 | 90  | -1476.232826 | 1.0  |
| 121 | -90  | 90  | -1476.232932 | 0.9  |
| 122 | -60  | 90  | -1476.229140 | 3.3  |
| 123 | -30  | 90  | -1476.224428 | 6.3  |
| 124 | 0    | 90  | -1476.216275 | 11.4 |
| 125 | 30   | 90  | -1476.219579 | 9.3  |
| 126 | 60   | 90  | -1476.225326 | 5.7  |
| 127 | 90   | 90  | -1476.229430 | 3.1  |
| 128 | 120  | 90  | -1476.227935 | 4.1  |
| 129 | 150  | 90  | -1476.226990 | 4.6  |
| 130 | 180  | 90  | -1476.225922 | 5.3  |
| 131 | -180 | 120 | -1476.231846 | 1.6  |
| 132 | -150 | 120 | -1476.232271 | 1.3  |
| 133 | -120 | 120 | -1476.233657 | 0.5  |
| 134 | -90  | 120 | -1476.234390 | 0.0  |
| 135 | -60  | 120 | -1476.230824 | 2.2  |
| 136 | -30  | 120 | -1476.224643 | 6.1  |
| 137 | 0    | 120 | -1476.216189 | 11.4 |
| 138 | 30   | 120 | -1476.218715 | 9.8  |
| 139 | 60   | 120 | -1476.225255 | 5.7  |

|     |      |     |              |      |
|-----|------|-----|--------------|------|
| 140 | 90   | 120 | -1476.228893 | 3.4  |
| 141 | 120  | 120 | -1476.227427 | 4.4  |
| 142 | 150  | 120 | -1476.226369 | 5.0  |
| 143 | 180  | 120 | -1476.225991 | 5.3  |
| 144 | -180 | 150 | -1476.231198 | 2.0  |
| 145 | -150 | 150 | -1476.232365 | 1.3  |
| 146 | -120 | 150 | -1476.233684 | 0.4  |
| 147 | -90  | 150 | -1476.233592 | 0.5  |
| 148 | -60  | 150 | -1476.229738 | 2.9  |
| 149 | -30  | 150 | -1476.224196 | 6.4  |
| 150 | 0    | 150 | -1476.214564 | 12.4 |
| 151 | 30   | 150 | -1476.216118 | 11.5 |
| 152 | 60   | 150 | -1476.221571 | 8.0  |
| 153 | 90   | 150 | -1476.226488 | 5.0  |
| 154 | 120  | 150 | -1476.226482 | 5.0  |
| 155 | 150  | 150 | -1476.225184 | 5.8  |
| 156 | 180  | 150 | -1476.225263 | 5.7  |
| 157 | -180 | 180 | -1476.229682 | 3.0  |
| 158 | -150 | 180 | -1476.231704 | 1.7  |
| 159 | -120 | 180 | -1476.231242 | 2.0  |
| 160 | -90  | 180 | -1476.230285 | 2.6  |
| 161 | -60  | 180 | -1476.228283 | 3.8  |
| 162 | -30  | 180 | -1476.222149 | 7.7  |
| 163 | 0    | 180 | -1476.210412 | 15.0 |
| 164 | 30   | 180 | -1476.211251 | 14.5 |
| 165 | 60   | 180 | -1476.217453 | 10.6 |
| 166 | 90   | 180 | -1476.224058 | 6.5  |
| 167 | 120  | 180 | -1476.222752 | 7.3  |
| 168 | 150  | 180 | -1476.221730 | 7.9  |
| 169 | 180  | 180 | -1476.223423 | 6.9  |

---

### 5.1.3. Energy and Population of Conformers

To better estimate the relative energy of each conformer, single point energies were calculated at the PCM-M062X/6-311++G(2d,2p)//B3LYP/6-31+G(d,p) level of theory in  $\text{CHCl}_3$ . The hybrid meta exchange-correlation density functional M06-2X empirically accounts for dispersive interactions and demonstrates high accuracy in main-group thermochemistry.<sup>6</sup> The free energies were calculated by combining single point PCM-M062X/6-311++G(2d,2p)//B3LYP/6-31+G(d,p) calculations with thermal and entropic corrections obtained at the PCM-B3LYP/6-31+G(d,p) level. Frequency analyses confirmed that all structures were true minima on the potential energy surface. The relative populations of the different conformers in 298 K  $\text{CHCl}_3$  solutions were estimated using Boltzmann statistics.



### 5.1.3.1. 1-(2-Nitrophenyl)-2,2-difluoroethanol Triflate (4-NO<sub>2</sub>)

**Table S3.** Energy and population of conformers of 1-(2-nitrophenyl)-2,2-difluoroethanol triflate (4-NO<sub>2</sub>).

| Conformer | Note            | PCM-B3LYP/6-31+G(d,p)        |                       |                                 |                  | PCM-M062X/6-311++G(2d,2p) <sup>a</sup> |                                    |                                 |                  |
|-----------|-----------------|------------------------------|-----------------------|---------------------------------|------------------|----------------------------------------|------------------------------------|---------------------------------|------------------|
|           |                 | Thermal Correction (hartree) | Free Energy (hartree) | Relative Free Energy (kcal/mol) | Pop <sup>b</sup> | Energy (hartree)                       | Free Energy (hartree) <sup>c</sup> | Relative Free Energy (kcal/mol) | Pop <sup>b</sup> |
| 1-trans-a |                 | 0.112272                     | -1674.612217          | 0.0                             | 56%              | -1674.653592                           | -1674.541320                       | 0.0                             | 69%              |
| 2-trans-a |                 | 0.112626                     | -1674.612069          | 0.1                             | 39%              | -1674.653608                           | -1674.540982                       | 0.2                             | 30%              |
| 3-trans-a |                 | 0.112203                     | -1674.600456          | 7.4                             | 0%               | -1674.642476                           | -1674.530273                       | 6.9                             | 0%               |
| 4-trans-a |                 | 0.111510                     | -1674.600870          | 7.1                             | 0%               | -1674.641174                           | -1674.529664                       | 7.3                             | 0%               |
| 1-trans-b |                 | 0.110981                     | -1674.610702          | 1.0                             | 1%               | -1674.649923                           | -1674.538942                       | 1.5                             | 0%               |
| 2-trans-b |                 | 0.111740                     | -1674.609904          | 1.5                             | 0%               | -1674.650151                           | -1674.538411                       | 1.8                             | 0%               |
| 3-trans-b |                 | 0.112625                     | -1674.599991          | 7.7                             | 0%               | -1674.642145                           | -1674.529520                       | 7.4                             | 0%               |
| 4-trans-b |                 | 0.111909                     | -1674.600377          | 7.4                             | 0%               | -1674.640720                           | -1674.528811                       | 7.8                             | 0%               |
| 1-trans-c |                 | 0.111460                     | -1674.610607          | 1.0                             | 1%               | -1674.649791                           | -1674.538331                       | 1.9                             | 0%               |
| 2-trans-c |                 | 0.111278                     | -1674.610828          | 0.9                             | 2%               | -1674.650151                           | -1674.538873                       | 1.5                             | 0%               |
| 3-trans-c |                 | 0.111512                     | -1674.602392          | 6.2                             | 0%               | -1674.643390                           | -1674.531878                       | 5.9                             | 0%               |
| 4-trans-c |                 | 0.111747                     | -1674.603527          | 5.5                             | 0%               | -1674.643951                           | -1674.532204                       | 5.7                             | 0%               |
| 1-cis-a   |                 | 0.111385                     | -1674.602534          | 6.1                             | 0%               | -1674.643048                           | -1674.531663                       | 6.1                             | 0%               |
| 2-cis-a   |                 | 0.110002                     | -1674.603595          | 5.4                             | 0%               | -1674.641949                           | -1674.531947                       | 5.9                             | 0%               |
| 3-cis-a   | Same as 4-cis-a | 0.111241                     | -1674.602476          | 6.1                             | 0%               | -1674.641833                           | -1674.530592                       | 6.7                             | 0%               |
| 4-cis-a   | Same as 3-cis-a | 0.111236                     | -1674.602480          | 6.1                             | 0%               | -1674.641835                           | -1674.530599                       | 6.7                             | 0%               |
| 1-cis-b   | Same as 1-cis-c | 0.112200                     | -1674.609211          | 1.9                             | 0%               | -1674.649812                           | -1674.537612                       | 2.3                             | 0%               |
| 2-cis-b   | Same as 2-cis-c | 0.111122                     | -1674.610185          | 1.3                             | 0%               | -1674.648737                           | -1674.537615                       | 2.3                             | 0%               |
| 3-cis-b   |                 | 0.109915                     | -1674.604159          | 5.1                             | 0%               | -1674.642530                           | -1674.532615                       | 5.5                             | 0%               |
| 4-cis-b   |                 | 0.111032                     | -1674.603044          | 5.8                             | 0%               | -1674.642351                           | -1674.531319                       | 6.3                             | 0%               |
| 1-cis-c   | Same as 1-cis-b | 0.112226                     | -1674.609186          | 1.9                             | 0%               | -1674.649818                           | -1674.537592                       | 2.3                             | 0%               |
| 2-cis-c   | Same as 2-cis-b | 0.110843                     | -1674.610464          | 1.1                             | 1%               | -1674.648745                           | -1674.537902                       | 2.1                             | 0%               |
| 3-cis-c   |                 | 0.111973                     | -1674.597897          | 9.0                             | 0%               | -1674.639416                           | -1674.527443                       | 8.7                             | 0%               |
| 4-cis-c   |                 | 0.111895                     | -1674.595274          | 10.6                            | 0%               | -1674.637148                           | -1674.525253                       | 10.1                            | 0%               |

a. Single point calculation; b. population distribution at 298 K; c. calculated based on single point energy at the PCM-M062X/6-311++G(2d,2p) level with thermal correction at the PCM-B3LYP/6-31+G(d,p) level.

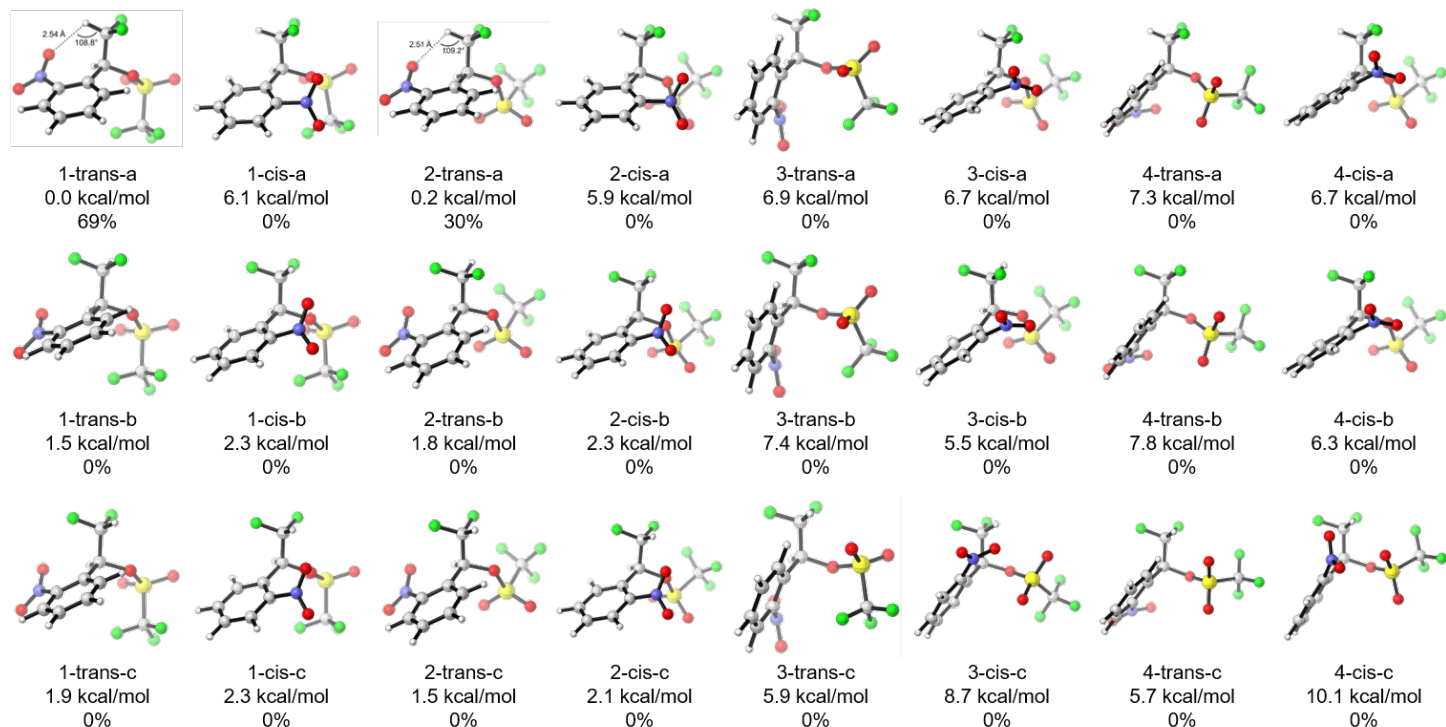

**Figure S17.** Conformers of 1-(2-nitrophenyl)-2,2-difluoroethanol triflate (**4-NO<sub>2</sub>**), relative free energies at the PCM-M062X/6-311++G(2d,2p)//PCM-B3LYP/6-31+G(d,p) level of theory, and population distribution.

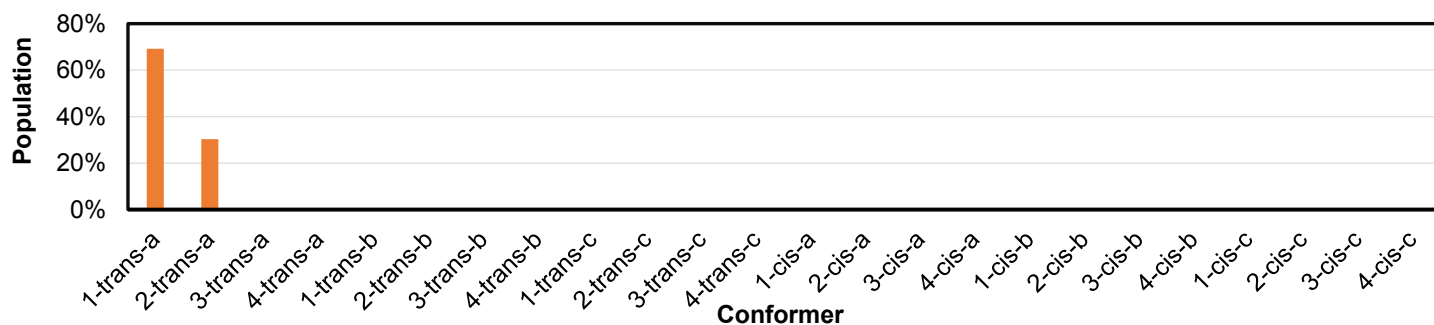

**Figure S18.** Calculated conformational distribution of 1-(2-nitrophenyl)-2,2-difluoroethanol triflate (**4-NO<sub>2</sub>**) at the PCM-M062X/6-311++G(2d,2p)//PCM-B3LYP/6-31+G(d,p) level of theory.

### 5.1.3.2. 1-(4-Bromo)-2,2-difluoroethanol Triflate (4-Br)

**Table S4.** Energy and population of conformers of 1-(4-bromo)-2,2-difluoroethanol triflate (**4-Br**).

| Conformer | PCM-B3LYP/6-31+G(d,p)        |                       |                                 |                  | PCM-M062X/6-311++G(2d,2p) <sup>a</sup> |                                    |                                 |                  |
|-----------|------------------------------|-----------------------|---------------------------------|------------------|----------------------------------------|------------------------------------|---------------------------------|------------------|
|           | Thermal Correction (hartree) | Free Energy (hartree) | Relative Free Energy (kcal/mol) | Pop <sup>b</sup> | Energy (hartree)                       | Free Energy (hartree) <sup>c</sup> | Relative Free Energy (kcal/mol) | Pop <sup>b</sup> |
| 1-a       | 0.100144                     | -4041.247341          | 1.1                             | 1%               | -4043.728933                           | -4043.628789                       | 0.9                             | 3%               |
| 2-a       | 0.100376                     | -4041.246631          | 1.6                             | 0%               | -4043.728676                           | -4043.628300                       | 1.2                             | 1%               |
| 3-a       | 0.099897                     | -4041.238942          | 6.4                             | 0%               | -4043.721209                           | -4043.621312                       | 5.5                             | 0%               |
| 4-a       | 0.099759                     | -4041.239247          | 6.2                             | 0%               | -4043.720294                           | -4043.620535                       | 6.0                             | 0%               |
| 1-b       | 0.100285                     | -4041.247327          | 1.2                             | 1%               | -4043.729036                           | -4043.628751                       | 0.9                             | 3%               |
| 2-b       | 0.099899                     | -4041.247043          | 1.3                             | 1%               | -4043.728057                           | -4043.628158                       | 1.3                             | 1%               |
| 3-b       | 0.101972                     | -4041.236209          | 8.1                             | 0%               | -4043.720046                           | -4043.618074                       | 7.6                             | 0%               |
| 4-b       | 0.099625                     | -4041.247316          | 1.2                             | 1%               | -4043.728057                           | -4043.628432                       | 1.1                             | 1%               |
| 1-c       | 0.098969                     | -4041.249162          | 0.0                             | 93%              | -4043.729120                           | -4043.630151                       | 0.0                             | 88%              |
| 2-c       | 0.099871                     | -4041.247833          | 0.8                             | 4%               | -4043.728607                           | -4043.628736                       | 0.9                             | 3%               |
| 3-c       | 0.101198                     | -4041.240206          | 5.6                             | 0%               | -4043.723971                           | -4043.622773                       | 4.6                             | 0%               |
| 4-c       | 0.100355                     | -4041.241206          | 5.0                             | 0%               | -4043.723145                           | -4043.622790                       | 4.6                             | 0%               |

a. Single point calculation; b. population distribution at 298 K; c. calculated based on single point energy at the PCM-M062X/6-311++G(2d,2p) level with thermal correction at the PCM-B3LYP/6-31+G(d,p) level.

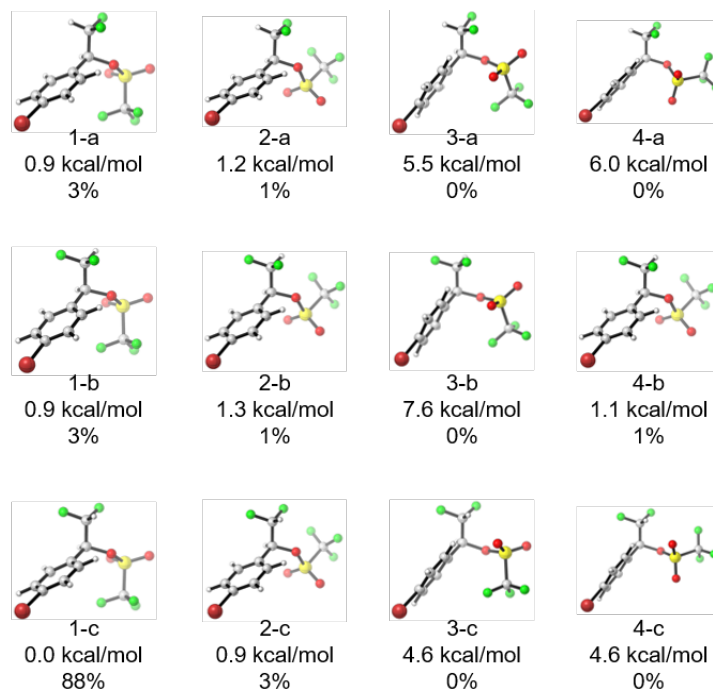

**Figure S19.** Conformers of 1-(4-bromophenyl)-2,2-difluoroethanol triflate (**4-Br**), relative free energies at the PCM-M062X/6-311++G(2d,2p)/PCM-B3LYP/6-31+G(d,p) level of theory, and population distribution.

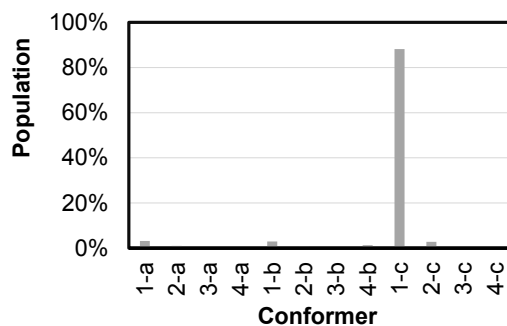

**Figure S20.** Calculated conformational distribution of 1-(4-bromophenyl)-2,2-difluoroethanol triflate (**4-Br**) at the PCM-M062X/6-311++G(2d,2p)/PCM-B3LYP/6-31+G(d,p) level of theory.

### 5.1.3.3. 1-(2-Fluoro)-2,2-difluoroethanol Triflate (4-F)

**Table S5.** Energy and population of conformers of 1-(2-fluoro)-2,2-difluoroethanol triflate (**4-F**).

| Conformer | Note            | PCM-B3LYP/6-31+G(d,p)        |                       |                                 | PCM-M062X/6-311++G(2d,2p) <sup>a</sup> |                  |                                    |                                 |                  |
|-----------|-----------------|------------------------------|-----------------------|---------------------------------|----------------------------------------|------------------|------------------------------------|---------------------------------|------------------|
|           |                 | Thermal Correction (hartree) | Free Energy (hartree) | Relative Free Energy (kcal/mol) | Pop <sup>b</sup>                       | Energy (hartree) | Free Energy (hartree) <sup>c</sup> | Relative Free Energy (kcal/mol) | Pop <sup>b</sup> |
| 1-trans-a |                 | 0.102401                     | -1569.356763          | 0.6                             | 5%                                     | -1569.402655     | -1569.300254                       | 0.0                             | 23%              |
| 2-trans-a |                 | 0.103180                     | -1569.355643          | 1.3                             | 0%                                     | -1569.402482     | -1569.299302                       | 0.6                             | 2%               |
| 3-trans-a |                 | 0.103350                     | -1569.347739          | 6.2                             | 0%                                     | -1569.396224     | -1569.292874                       | 4.6                             | 0%               |
| 4-trans-a |                 | 0.103021                     | -1569.347816          | 6.2                             | 0%                                     | -1569.394612     | -1569.291591                       | 5.4                             | 0%               |
| 1-trans-b |                 | 0.103383                     | -1569.355759          | 1.2                             | 0%                                     | -1569.402683     | -1569.299300                       | 0.6                             | 2%               |
| 2-trans-b |                 | 0.102905                     | -1569.355676          | 1.3                             | 0%                                     | -1569.401946     | -1569.299041                       | 0.8                             | 1%               |
| 3-trans-b |                 | 0.103322                     | -1569.347209          | 6.6                             | 0%                                     | -1569.395286     | -1569.291964                       | 5.2                             | 0%               |
| 4-trans-b |                 | 0.103038                     | -1569.347214          | 6.6                             | 0%                                     | -1569.393381     | -1569.290343                       | 6.2                             | 0%               |
| 1-trans-c |                 | 0.101973                     | -1569.357648          | 0.0                             | 44%                                    | -1569.402405     | -1569.300432                       | -0.1                            | 35%              |
| 2-trans-c |                 | 0.102839                     | -1569.356319          | 0.9                             | 2%                                     | -1569.402276     | -1569.299437                       | 0.5                             | 3%               |
| 3-trans-c |                 | 0.104101                     | -1569.348911          | 5.5                             | 0%                                     | -1569.398239     | -1569.294138                       | 3.8                             | 0%               |
| 4-trans-c |                 | 0.103477                     | -1569.350042          | 4.8                             | 0%                                     | -1569.397293     | -1569.293816                       | 4.0                             | 0%               |
| 1-cis-a   |                 | 0.103179                     | -1569.353100          | 2.9                             | 0%                                     | -1569.399971     | -1569.296792                       | 2.2                             | 0%               |
| 2-cis-a   |                 | 0.103959                     | -1569.351897          | 3.6                             | 0%                                     | -1569.399175     | -1569.295216                       | 3.2                             | 0%               |
| 3-cis-a   | Same as 4-cis-a | 0.104669                     | -1569.343396          | 9.0                             | 0%                                     | -1569.394196     | -1569.289527                       | 6.7                             | 0%               |
| 4-cis-a   | Same as 3-cis-a | 0.104670                     | -1569.343395          | 9.0                             | 0%                                     | -1569.394193     | -1569.289523                       | 6.7                             | 0%               |
| 1-cis-b   |                 | 0.103911                     | -1569.352735          | 3.1                             | 0%                                     | -1569.400345     | -1569.296434                       | 2.4                             | 0%               |
| 2-cis-b   |                 | 0.103598                     | -1569.352477          | 3.3                             | 0%                                     | -1569.399127     | -1569.295529                       | 3.0                             | 0%               |
| 3-cis-b   |                 | 0.103633                     | -1569.342092          | 9.8                             | 0%                                     | -1569.390716     | -1569.287083                       | 8.3                             | 0%               |
| 4-cis-b   |                 | 0.104129                     | -1569.341666          | 10.0                            | 0%                                     | -1569.391467     | -1569.287338                       | 8.1                             | 0%               |
| 1-cis-c   |                 | 0.102027                     | -1569.357678          | 0.0                             | 47%                                    | -1569.402423     | -1569.300396                       | -0.1                            | 32%              |
| 2-cis-c   |                 | 0.103335                     | -1569.355956          | 1.1                             | 1%                                     | -1569.402161     | -1569.298826                       | 0.9                             | 1%               |
| 3-cis-c   |                 | 0.103653                     | -1569.347467          | 6.4                             | 0%                                     | -1569.396820     | -1569.293167                       | 4.4                             | 0%               |
| 4-cis-c   |                 | 0.103105                     | -1569.348665          | 5.7                             | 0%                                     | -1569.395854     | -1569.292749                       | 4.7                             | 0%               |

a. Single point calculation; b. population distribution at 298 K; c. calculated based on single point energy at the PCM-M062X/6-311++G(2d,2p) level with thermal correction at the PCM-B3LYP/6-31+G(d,p) level.

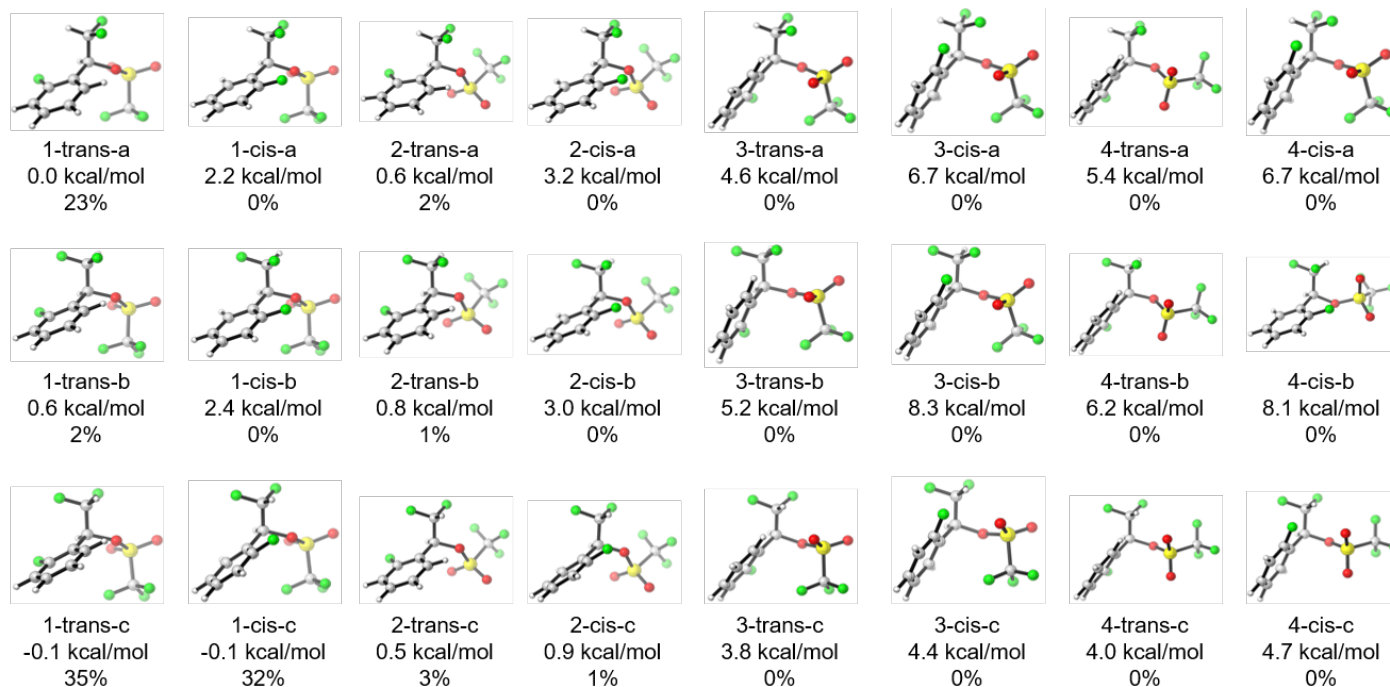

**Figure S21.** Conformers of 1-(2-fluorophenyl)-2,2-difluoroethanol triflate (**4-F**), relative free energies at the PCM-M062X/6-311++G(2d,2p)/PCM-B3LYP/6-31+G(d,p) level of theory, and population distribution.

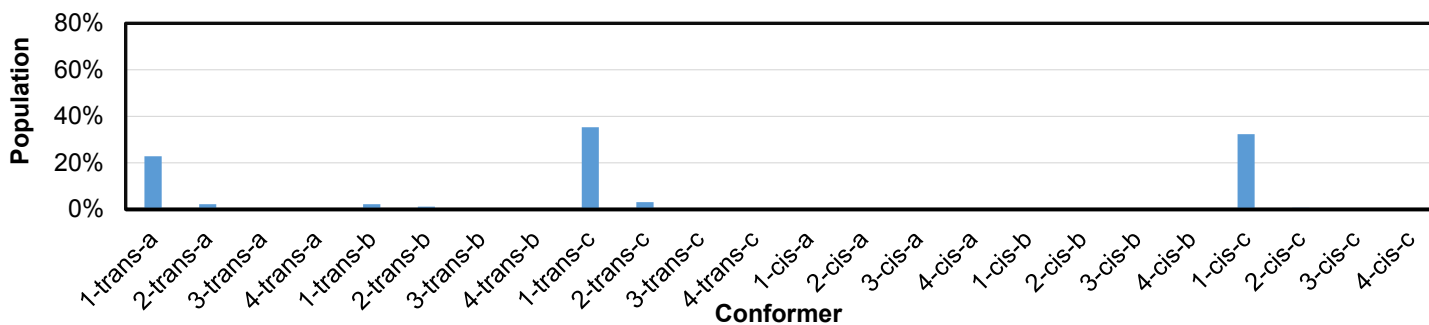

**Figure S22.** Calculated conformational distribution of 1-(2-fluoro)-2,2-difluoroethanol triflate (**4-F**) at the PCM-M062X/6-311++G(2d,2p)/PCM-B3LYP/6-31+G(d,p) level of theory.

### 5.1.3.4. $\alpha,\alpha$ -Difluorotoluene

The conformations of  $\alpha,\alpha$ -difluorotoluene are determined by the rotation about the Ph–CF<sub>2</sub>H bond (Table S6 and Figure S23). The rotations were scanned from 0° to +360° with an increment of 30° of each step. The conformations generated were optimized at the PCM-B3LYP/6-31+G(d) level CHCl<sub>3</sub> using Gaussian 09.<sup>5</sup> One local minimum was found, which was further optimized at the PCM-B3LYP/6-31+G(d,p) level in CHCl<sub>3</sub>.

**Table S6.** Energy of conformers of  $\alpha,\alpha$ -difluorotoluene.

| $\Phi_{\text{H-CF}_2\text{-C}_1\text{-C}_2}$ (°) | E (hartree) <sup>a</sup> | E <sub>rel</sub> (kcal/mol) |
|--------------------------------------------------|--------------------------|-----------------------------|
| 0                                                | -470.068923              | 0.0                         |
| 30                                               | -470.0683876             | 0.3                         |
| 60                                               | -470.0675582             | 0.9                         |
| 90                                               | -470.0675213             | 0.9                         |
| 120                                              | -470.0675695             | 0.9                         |
| 150                                              | -470.0683355             | 0.4                         |
| 180                                              | -470.0689228             | 0.0                         |
| 210                                              | -470.0683346             | 0.4                         |
| 240                                              | -470.0675704             | 0.9                         |
| 270                                              | -470.0675216             | 0.9                         |
| 300                                              | -470.0675575             | 0.9                         |
| 330                                              | -470.0683873             | 0.3                         |
| 360                                              | -470.0689255             | 0.0                         |

a. calculated at the PCM-B3LYP/6-31+G(d) level using "loose" optimization convergence criteria.

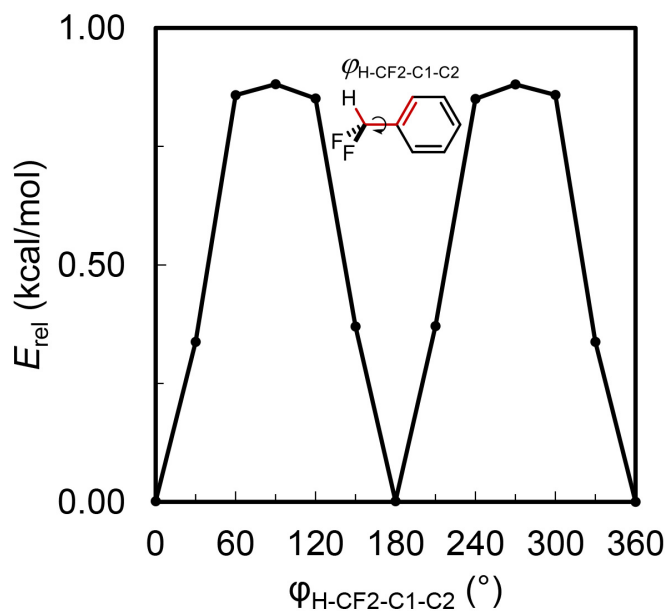

**Figure S23.** Torsional itinerary for  $\alpha,\alpha$ -difluorotoluene.

### 5.1.3.5. *o*-Nitro- $\alpha,\alpha$ -difluorotoluene (1-CF<sub>2</sub>H)

The conformations of 1-CF<sub>2</sub>H are determined by the rotation about the Ar-CF<sub>2</sub>H bond (Table S7 and Figure S24). The rotations were scanned from 0° to +360° with an increment of 30° of each step. The generated conformations were optimized at the PCM-B3LYP/6-31+G(d) level CHCl<sub>3</sub> using Gaussian 09.<sup>5</sup> Because of the cooperative rotation about the Ar-NO<sub>2</sub> bond, three local minima were found, which were further optimized at the PCM-B3LYP/6-31+G(d,p) level in CHCl<sub>3</sub>.

**Table S7.** Energy of conformers of *o*-nitro- $\alpha,\alpha$ -difluorotoluene (1-CF<sub>2</sub>H).

| $\Phi_{\text{H-CF}_2\text{-C}_1\text{-C}_2}$ (°) | E (hartree) <sup>a</sup> | E <sub>rel</sub> (kcal/mol) |
|--------------------------------------------------|--------------------------|-----------------------------|
| 0                                                | -674.571651              | 0.5                         |
| 30                                               | -674.571097              | 0.9                         |
| 60                                               | -674.572428              | 0.0                         |
| 90                                               | -674.569701              | 1.7                         |
| 120                                              | -674.565105              | 4.6                         |
| 150                                              | -674.568100              | 2.7                         |
| 180                                              | -674.567188              | 3.3                         |
| 210                                              | -674.568100              | 2.7                         |
| 240                                              | -674.564582              | 5.0                         |
| 270                                              | -674.569702              | 1.7                         |
| 300                                              | -674.572428              | 0.0                         |
| 330                                              | -674.572474              | 0.0                         |
| 360                                              | -674.571652              | 0.5                         |

a. calculated at the PCM-B3LYP/6-31+G(d) level using "loose" optimization convergence criteria.

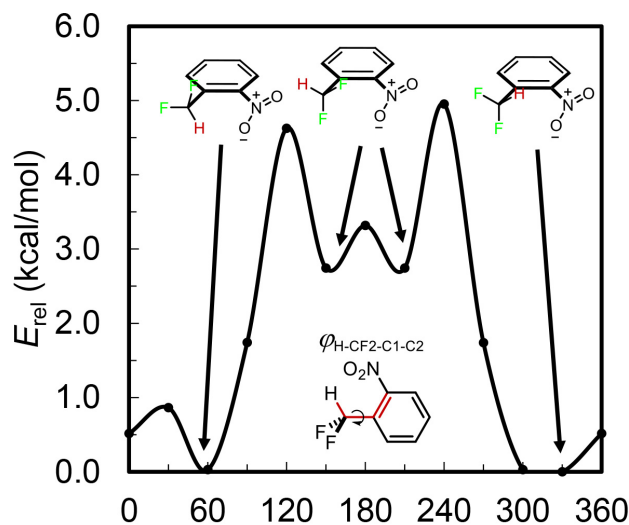

**Figure S24.** Torsional itinerary for *o*-nitro- $\alpha,\alpha$ -difluorotoluene.



### 5.1.3.6. Phenol

The conformations of phenol are determined by the rotation about the Ar–OH bond (Table S8 and Figure S25). The rotations were scanned from 0° to +360° with an increment of 30° of each step. The generated conformations were optimized at the PCM-B3LYP/6-31+G(d) level CHCl<sub>3</sub> using Gaussian 09.<sup>5</sup> Only one local minimum was found, which was further optimized at the PCM-B3LYP/6-31+G(d,p) level in CHCl<sub>3</sub>.

**Table S8.** Energy of conformers of phenol.

| $\Phi_{\text{H-O-C1-C2}}$ (°) | E (hartree) <sup>a</sup> | E <sub>rel</sub> (kcal/mol) |
|-------------------------------|--------------------------|-----------------------------|
| 0                             | -307.485201              | 0.0                         |
| 30                            | -307.483831              | 0.9                         |
| 60                            | -307.481003              | 2.6                         |
| 90                            | -307.479432              | 3.6                         |
| 120                           | -307.480710              | 2.8                         |
| 150                           | -307.483626              | 1.0                         |
| 180                           | -307.485212              | 0.0                         |
| 210                           | -307.483642              | 1.0                         |
| 240                           | -307.480708              | 2.8                         |
| 270                           | -307.479434              | 3.6                         |
| 300                           | -307.481003              | 2.6                         |
| 330                           | -307.483823              | 0.9                         |
| 360                           | -307.485221              | 0.0                         |

a. calculated at the PCM-B3LYP/6-31+G(d) level using "loose" optimization convergence criteria.

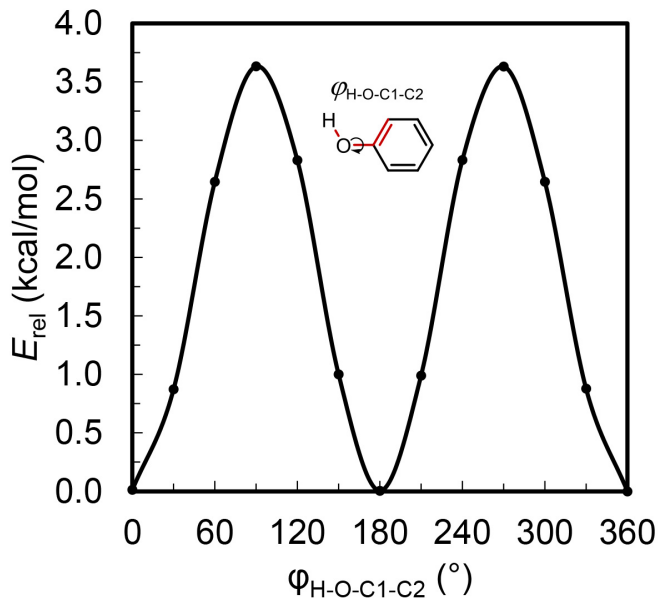

**Figure S25.** Torsional itinerary for phenol.

### 5.1.3.7. *o*-Nitrophenol (1-OH)

The conformations of *o*-nitrophenol are determined by the rotation about the Ar–OH bond (Table S9 and Figure S26). The rotations were scanned from 0° to +360° with an increment of 30° of each step. The conformations generated were optimized at the PCM-B3LYP/6-31+G(d) level CHCl<sub>3</sub> using Gaussian 09.<sup>5</sup> Two local minima were found, which were further optimized at the PCM-B3LYP/6-31+G(d,p) level in CHCl<sub>3</sub>.

**Table S9.** Energy of conformers of *o*-nitrophenol (**1-OH**).

| $\Phi_{\text{H-O-C1-C2}}$ (°) | E (hartree) <sup>a</sup> | E <sub>rel</sub> (kcal/mol) |
|-------------------------------|--------------------------|-----------------------------|
| 0                             | -511.991909              | 8.0                         |
| 30                            | -511.990346              | 8.9                         |
| 60                            | -511.986469              | 11.4                        |
| 90                            | -511.984287              | 12.7                        |
| 120                           | -511.991818              | 8.0                         |
| 150                           | -512.000163              | 2.8                         |
| 180                           | -512.004598              | 0.0                         |
| 210                           | -512.000166              | 2.8                         |
| 240                           | -511.991816              | 8.0                         |
| 270                           | -511.986838              | 11.1                        |
| 300                           | -511.986929              | 11.1                        |
| 330                           | -511.989790              | 9.3                         |
| 360                           | -511.992000              | 7.9                         |

a. calculated at the PCM-B3LYP/6-31+G(d) level using "loose" optimization convergence criteria.

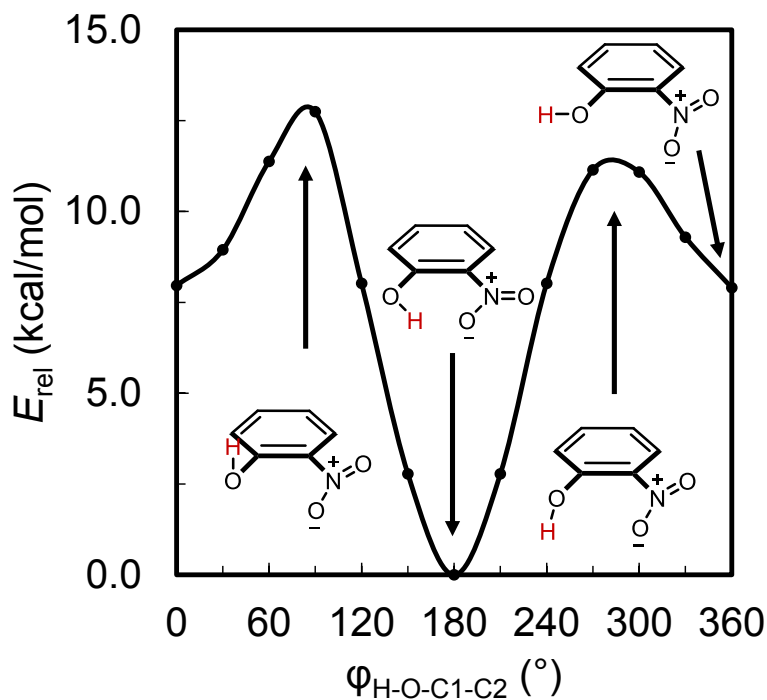

**Figure S26.** Torsional itinerary for *o*-nitrophenol.

### 5.1.3.8. Dimerization of *o*-nitro- $\alpha,\alpha$ -difluorotoluenes (**1-CF<sub>2</sub>H**) and *o*-nitrophenol (**1-OH**)

The possible dimerization of **1-CF<sub>2</sub>H** and **1-OH** was investigated by geometry optimization at the PCM-B3LYP/6-31+G(d,p) level of theory in CHCl<sub>3</sub> (Table S10). The free energies at the PCM-M062X/6-311++G(2d,2p) level of theory were calculated as a sum of the single point energies at the PCM-M062X/6-311++G(2d,2p)//B3LYP/6-31+G(d,p) level and the thermal and entropic corrections at the PCM-B3LYP/6-31+G(d,p) level. The frequency analysis confirmed that all structures were true minima.

The structure of the dimer of **1-OH** largely resembles that found in X-ray crystallographic studies. Two types of dimers, (CF<sub>2</sub>HNbc)<sub>2</sub> and (CF<sub>2</sub>HNbc)<sub>2</sub>' , were found for **1-CF<sub>2</sub>H**. The former, which has an arrangement similar to the crystal structure, is slightly more stable than the latter. As indicated by the relative energies  $\Delta E$ , the dimerization of both **1-CF<sub>2</sub>H** and **1-OH** is facilitated by attractive hydrogen bonding interactions, ranging from 1 to 3 kcal/mol for two bondings. Noticeably, the very similar values of  $\Delta E$  of **1-CF<sub>2</sub>H** and **1-OH** at both levels of theory suggest that the magnitudes of hydrogen bonding interactions of the NO<sub>2</sub> group with the CF<sub>2</sub>H and the OH moieties may be comparable. According to the free energies  $\Delta G$  for the dimerization of **1-CF<sub>2</sub>H** and **1-OH**, these processes are unfavorable in CHCl<sub>3</sub> at room temperature, likely due to the entropic penalty.

**Table S10.** Dimerization of *o*-nitro- $\alpha,\alpha$ -difluorotoluenes (**1-CF<sub>2</sub>H**) and *o*-nitrophenol (**1-OH**).

| Conformer /species                     | PCM-B3LYP/6-31+G(d,p)        |                       |                                       |                                            | PCM-M062X/6-311++G(2d,2p) <sup>a</sup> |                                    |                                       |                                            |
|----------------------------------------|------------------------------|-----------------------|---------------------------------------|--------------------------------------------|----------------------------------------|------------------------------------|---------------------------------------|--------------------------------------------|
|                                        | Thermal Correction (hartree) | Free Energy (hartree) | Relative Energy $\Delta E$ (kcal/mol) | Relative Free Energy $\Delta G$ (kcal/mol) | Energy (hartree)                       | Free Energy (hartree) <sup>b</sup> | Relative Energy $\Delta E$ (kcal/mol) | Relative Free Energy $\Delta G$ (kcal/mol) |
| PhOH                                   | 0.075258                     | -307.423470           | -                                     | -                                          | -307.440639                            | -307.365381                        | -                                     | -                                          |
| 1-OH-a                                 | 0.074845                     | -511.941775           | 0.0                                   | 0.0                                        | -511.942316                            | -511.867471                        | 0.0                                   | 0.0                                        |
| 1-OH-b                                 | 0.073821                     | -511.930088           | 8.0                                   | 7.3                                        | -511.931986                            | -511.858165                        | 6.5                                   | 5.8                                        |
| (1-OH-a) <sub>2</sub>                  | 0.163048                     | -1023.871805          | -1.0                                  | 7.4                                        | -1023.889140                           | -1023.726092                       | -2.8                                  | 5.6                                        |
| PhCF <sub>2</sub> H                    | 0.080359                     | -469.997675           | -                                     | -                                          | -470.012546                            | -469.932187                        | -                                     | -                                          |
| 1-CF <sub>2</sub> H-a                  | 0.079415                     | -674.500788           | 0.0                                   | 0.1                                        | -674.504260                            | -674.424845                        | 0.0                                   | 0.0                                        |
| 1-CF <sub>2</sub> H-b                  | 0.079492                     | -674.496633           | 2.6                                   | 2.7                                        | -674.499857                            | -674.420365                        | 2.8                                   | 2.8                                        |
| 1-CF <sub>2</sub> H-c                  | 0.079343                     | -674.500880           | 0.0                                   | 0.0                                        | -674.503649                            | -674.424306                        | 0.4                                   | 0.3                                        |
| (1-CF <sub>2</sub> H-a) <sub>2</sub>   | 0.171262                     | -1348.991411          | -1.4                                  | 6.5                                        | -1349.012188                           | -1348.840926                       | -2.3                                  | 5.5                                        |
| (1-CF <sub>2</sub> H-a) <sub>2</sub> ' | 0.172058                     | -1348.990048          | -1.0                                  | 7.3                                        | -1349.012212                           | -1348.840154                       | -2.3                                  | 6.0                                        |

a. Single point calculation; b. calculated based on single point energy at the PCM-M062X/6-311++G(2d,2p) level and thermal correction at the PCM-B3LYP/6-31+G(d,p) level.

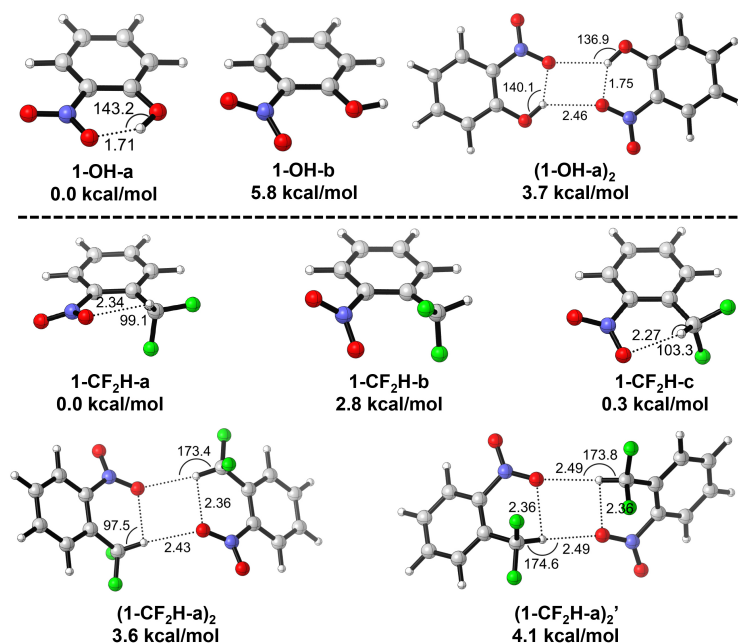

**Figure S27.** Dimerization of *o*-nitrophenol (**1-OH**) and *o*-nitro- $\alpha,\alpha$ -difluorotoluene (**1-CF<sub>2</sub>H**) at the B3LYP/6-31+G(d,p) level. The relative free energy  $\Delta G$  was calculated at the PCM-M062X/6-311++G(2d,2p)//B3LYP/6-31+G(d,p) level in CHCl<sub>3</sub>. A 1.9 kcal/mol correction was applied to account for the concentration change from the gas phase to 1 M in solution.

We further investigated the solvent effects on the dimerization energies (Table S11). Single point energies were calculated at the PCM-M062X/6-311++G(2d,2p)//B3LYP/6-31+G(d,p) level of theory. As expected, the dimerization energies decrease with the increase in solvent dielectric constants, which facilitates the solvation of monomeric species.

**Table S11.** Dimerization energies of *o*-nitro- $\alpha,\alpha$ -difluorotoluenes (**1-CF<sub>2</sub>H**) and *o*-nitrophenol (**1-OH**) in the gas phase and in different solvents.

|                                           | Gas ( $\epsilon = 0.00$ ) |              | Pentane ( $\epsilon = 1.84$ ) |              | Benzene ( $\epsilon = 2.27$ ) |              | CHCl <sub>3</sub> ( $\epsilon = 4.71$ ) |              | DMF ( $\epsilon = 37.22$ ) |              | Water ( $\epsilon = 78.36$ ) |              |
|-------------------------------------------|---------------------------|--------------|-------------------------------|--------------|-------------------------------|--------------|-----------------------------------------|--------------|----------------------------|--------------|------------------------------|--------------|
|                                           | <i>E</i> (hartree)        | $\Delta E^a$ | <i>E</i> (hartree)            | $\Delta E^a$ | <i>E</i> (hartree)            | $\Delta E^a$ | <i>E</i> (hartree)                      | $\Delta E^a$ | <i>E</i> (hartree)         | $\Delta E^a$ | <i>E</i> (hartree)           | $\Delta E^a$ |
| <b>1-CF<sub>2</sub>H-a</b>                | -674.497589               | 0.0          | -674.500840                   | 0.0          | -674.501786                   | 0.0          | -674.504260                             | 0.0          | -674.506829                | 0.0          | -674.507052                  | 0.0          |
| <b>1-CF<sub>2</sub>H-b</b>                | -674.490483               | 4.5          | -674.494995                   | 3.7          | -674.496328                   | 3.4          | -674.499857                             | 2.8          | -674.503592                | 2.0          | -674.503920                  | 2.0          |
| <b>1-CF<sub>2</sub>H-c</b>                | -674.496578               | 0.6          | -674.500022                   | 0.5          | -674.501025                   | 0.5          | -674.503649                             | 0.4          | -674.506376                | 0.3          | -674.506613                  | 0.3          |
| <b>(1-CF<sub>2</sub>H-a)<sub>2</sub></b>  | -1349.000802              | -3.5         | -1349.006372                  | -2.9         | -1349.007986                  | -2.8         | -1349.012188                            | -2.3         | -1349.016518               | -1.8         | -1349.016892                 | -1.7         |
| <b>(1-CF<sub>2</sub>H-a)<sub>2</sub>'</b> | -1349.000669              | -3.4         | -1349.006261                  | -2.9         | -1349.007899                  | -2.7         | -1349.012212                            | -2.3         | -1349.016748               | -1.9         | -1349.017146                 | -1.9         |
| <b>1-OH-a</b>                             | -511.937180               | 0.0          | -511.939671                   | 0.0          | -511.940401                   | 0.0          | -511.942316                             | 0.0          | -511.944311                | 0.0          | -511.944485                  | 0.0          |
| <b>1-OH-b</b>                             | -511.921887               | 9.6          | -511.926769                   | 8.1          | -511.928204                   | 7.7          | -511.931986                             | 6.5          | -511.935944                | 5.3          | -511.936289                  | 5.1          |
| <b>(1-OH-a)<sub>2</sub></b>               | -1023.880000              | -3.5         | -1023.884341                  | -3.1         | -1023.885643                  | -3.0         | -1023.889140                            | -2.8         | -1023.892937               | -2.7         | -1023.893275                 | -2.7         |
| <b>DMF</b>                                | -248.479011               | -            | -248.482500                   | -            | -248.483512                   | -            | -248.486146                             | -            | -248.488846                | -            | -248.489078                  | -            |
| <b>Py</b>                                 | -248.248367               | -            | -248.250232                   | -            | -248.250793                   | -            | -248.252295                             | -            | -248.253906                | -            | -248.254048                  | -            |
| <b>BDFol</b>                              | -3043.576746              | -            | -3043.579023                  | -            | -3043.579684                  | -            | -3043.581416                            | -            | -3043.583223               | -            | -3043.583380                 | -            |
| <b>BDFol-DMF</b>                          | -3292.064576              | -5.5         | -3292.068842                  | -4.6         | -3292.070025                  | -4.3         | -3292.073026                            | -3.4         | -3292.076036               | -2.5         | -3292.076293                 | -2.4         |
| <b>BDFol-Py</b>                           | -3291.832107              | -4.4         | -3291.835185                  | -3.7         | -3291.836045                  | -3.5         | -3291.838244                            | -2.8         | -3291.840471               | -2.1         | -3291.840662                 | -2.0         |

## 5.2. Simulated NMR Spectra

To validate the conformations identified by NMR studies, the NMR properties of major conformers in  $\text{CHCl}_3$  were computed at the GIAO-PCM-B3LYP/aug-cc-PVTZ//PCM-B3LYP/6-31+G(d,p) level of theory using Gaussian 09.<sup>5</sup> To obtain scaling factors for achieving accurate computed chemical shifts, we carried out a linear regression analysis of experimental and computational chemical shift values. Similar methods have been exploited to show higher accuracies for  $^1\text{H}$  NMR and  $^{13}\text{C}$  NMR spectroscopy.<sup>7</sup> By correlating the calculated magnetic shielding tensors and experimental NMR chemical shifts of a series of known compounds as references (Table S12), scaling factors for the  $^1\text{H}$ ,  $^{19}\text{F}$  NMR, and  $^{13}\text{C}$  NMR chemical shifts were obtained with satisfactory  $R^2$  values (Figure S28). On the basis of the scaling factors and the calculated shielding tensors, predicted NMR chemical shifts of individual conformers of **4-NO<sub>2</sub>**, **4-Br**, and **4-F** were obtained. With these values in hand, we calculated weighted average chemical shifts according to Eq. (S1).

$$\delta = \sum_i P_i \delta_i \quad \text{Eq. (S1)}$$

Here,  $P_i$  is the population (%) of the  $i^{\text{th}}$  conformer and  $\delta_i$  is the NMR chemical shift of a specific nucleus of the  $i^{\text{th}}$  conformer. A comparison of predicted and experimental NMR chemical shifts was achieved by linear regression analysis. Other than the  $^{13}\text{C}$  NMR of **4-Br**, the correlations generally have  $R^2 > 0.95$ , suggesting the validity of NMR assignments and conformational identifications. The low  $R^2$  value of the  $^{13}\text{C}$  NMR of **4-Br** mainly arises from the large deviation of the predicted chemical shift of the brominated carbon atom from the experimental value. This result is likely due to the well-known heavy-atom effects, which usually lead to higher errors in calculated  $^{13}\text{C}$  NMR chemical shifts.<sup>7</sup> In addition to the major conformers, the chemical shifts of several minor conformers were also calculated. The calculated NMR chemical shifts for the other conformers do not match the experimental data, suggesting that these states are not substantially populated under our experimental conditions.

### 5.2.1. Establishment of Scaling Factors

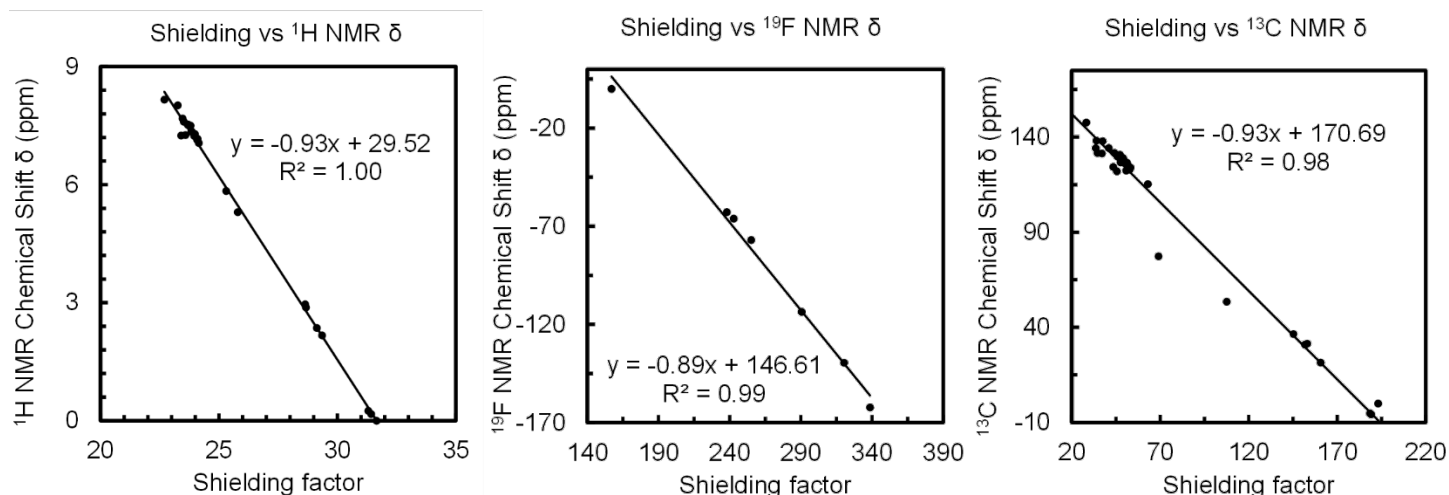

**Figure S28.** Linear regression analyses of computed shielding tensors and experimental NMR chemical shifts of reference compounds.

**Table S12.** Experimental chemical shifts and computed shielding tensors of reference compounds.

|                                    | <sup>1</sup> H NMR  |                                   |           | <sup>13</sup> C NMR |                                   |           | <sup>19</sup> F NMR               |           |
|------------------------------------|---------------------|-----------------------------------|-----------|---------------------|-----------------------------------|-----------|-----------------------------------|-----------|
|                                    | Atom(s)             | $\bar{\delta}_{\text{exp}}$ (ppm) | shielding | Atom(s)             | $\bar{\delta}_{\text{exp}}$ (ppm) | shielding | $\bar{\delta}_{\text{exp}}$ (ppm) | shielding |
| acetone                            | CH <sub>3</sub>     | 2.17 <sup>a</sup>                 | 29.35     | CO                  | 207.1 <sup>a</sup>                | -38.44    |                                   |           |
|                                    |                     |                                   |           | CH <sub>3</sub>     | 30.9 <sup>a</sup>                 | 151.69    |                                   |           |
| PhBr                               |                     | 7.50 <sup>b</sup>                 | 23.80     |                     | 131.4 <sup>c</sup>                | 37.10     |                                   |           |
|                                    |                     | 7.24 <sup>b</sup>                 | 23.95     |                     | 129.9 <sup>c</sup>                | 45.80     |                                   |           |
|                                    |                     | 7.29 <sup>b</sup>                 | 23.98     |                     | 126.7 <sup>c</sup>                | 47.57     |                                   |           |
|                                    |                     |                                   |           |                     | 122.4 <sup>c</sup>                | 50.75     |                                   |           |
| PhCl                               |                     |                                   | 23.87     |                     | 134.3 <sup>c</sup>                | 33.63     |                                   |           |
|                                    |                     |                                   | 23.91     |                     | 129.6 <sup>c</sup>                | 47.55     |                                   |           |
|                                    |                     |                                   | 23.99     |                     | 128.6 <sup>c</sup>                | 48.84     |                                   |           |
|                                    |                     |                                   |           |                     | 126.6 <sup>c</sup>                | 51.16     |                                   |           |
| PhF                                | 3,3'                | 7.34 <sup>b</sup>                 | 23.85     | 1                   | 163.0 <sup>c</sup>                | 9.32      | -113.6                            | 290.64    |
|                                    | 4                   | 7.14 <sup>b</sup>                 | 24.08     | 3,3'                | 123.0 <sup>c</sup>                | 47.02     |                                   |           |
|                                    | 2,2'                | 7.06 <sup>b</sup>                 | 24.15     | 4                   | 124.0 <sup>c</sup>                | 53.23     |                                   |           |
|                                    |                     |                                   |           | 2,2'                | 115.3 <sup>c</sup>                | 63.05     |                                   |           |
| benzene                            |                     | 7.36 <sup>a</sup>                 | 23.83     |                     | 128.4 <sup>a</sup>                | 48.57     |                                   |           |
| C <sub>6</sub> F <sub>6</sub>      |                     |                                   |           |                     | 138.15 <sup>b</sup>               | 33.95     | -162.25 <sup>b</sup>              | 338.67    |
| CFCl <sub>3</sub>                  |                     |                                   |           |                     |                                   | 25.20     | 0.0 <sup>b</sup>                  | 157.04    |
| CF <sub>3</sub> H                  |                     |                                   | 24.67     |                     |                                   | 53.63     | -77.0                             | 255.12    |
| CH <sub>2</sub> Cl <sub>2</sub>    |                     | 5.30 <sup>a</sup>                 | 25.79     |                     | 53.5 <sup>a</sup>                 | 107.59    |                                   |           |
| CHCl <sub>3</sub>                  |                     | 7.26 <sup>a</sup>                 | 23.58     |                     | 77.4 <sup>a</sup>                 | 69.01     |                                   |           |
| DMF                                | COH                 | 8.02 <sup>a</sup>                 | 23.26     | CO                  | 162.6 <sup>a</sup>                | 15.10     |                                   |           |
|                                    | CH <sub>3</sub> (1) | 2.88 <sup>a</sup>                 | 28.67     | CH <sub>3</sub> (1) | 36.5 <sup>a</sup>                 | 145.21    |                                   |           |
|                                    | CH <sub>3</sub> (2) | 2.96 <sup>a</sup>                 | 28.64     | CH <sub>3</sub> (2) | 31.5 <sup>a</sup>                 | 153.02    |                                   |           |
| PhCF <sub>3</sub>                  | H2,2'               | 7.60 <sup>d</sup>                 | 23.51     | CF <sub>3</sub>     | 124.3 <sup>d</sup>                | 43.44     | -62.8 <sup>d</sup>                | 238.04    |
|                                    | H3,3',4             | 7.53 <sup>d</sup>                 | 23.69     | C4                  | 131.7 <sup>d</sup>                | 44.09     |                                   |           |
|                                    |                     |                                   |           | C1                  | 130.7 <sup>d</sup>                | 47.24     |                                   |           |
|                                    |                     |                                   |           | C3                  | 128.7 <sup>d</sup>                | 48.67     |                                   |           |
|                                    |                     |                                   |           | C2                  | 125.2 <sup>d</sup>                | 51.82     |                                   |           |
| PhCH <sub>3</sub>                  | H2,2',3,3'          | 7.25 <sup>a</sup>                 | 23.40     | C1                  | 137.9 <sup>a</sup>                | 37.45     |                                   |           |
|                                    | H4                  | 7.17 <sup>a</sup>                 | 24.09     | C2,2'               | 129.1 <sup>a</sup>                | 49.04     |                                   |           |
|                                    | CH <sub>3</sub>     | 2.36 <sup>a</sup>                 | 29.13     | C3,3'               | 128.3 <sup>a</sup>                | 49.29     |                                   |           |
|                                    |                     |                                   |           | C4                  | 125.3 <sup>a</sup>                | 51.56     |                                   |           |
|                                    |                     |                                   |           | CH <sub>3</sub>     | 21.5 <sup>a</sup>                 | 160.67    |                                   |           |
| PhNO <sub>2</sub>                  | H2,2'               | 8.16 <sup>e</sup>                 | 22.69     | C1                  | 147.7 <sup>e</sup>                | 28.22     |                                   |           |
|                                    | H4                  | 7.68 <sup>e</sup>                 | 23.46     | C4                  | 134.3 <sup>e</sup>                | 40.88     |                                   |           |
|                                    | H3,3'               | 7.52 <sup>e</sup>                 | 23.68     | C3,3'               | 128.9 <sup>e</sup>                | 48.50     |                                   |           |
|                                    |                     |                                   |           | C2,2'               | 122.9 <sup>e</sup>                | 52.73     |                                   |           |
| TMSCF <sub>2</sub> H               | CF <sub>2</sub> H   | 5.84 <sup>b</sup>                 | 25.3      | CF <sub>2</sub> H   | 122.1 <sup>b</sup>                | 45.57     | -139.6 <sup>b</sup>               | 320.46    |
|                                    | CH <sub>3</sub>     | 0.17 <sup>b</sup>                 | 31.42     | CH <sub>3</sub>     | -5.7 <sup>b</sup>                 | 189.11    |                                   |           |
| (CH <sub>3</sub> ) <sub>4</sub> Si |                     | 0.00 <sup>b</sup>                 | 31.65     |                     | 0.0 <sup>b</sup>                  | 193.08    |                                   |           |
| TMSCF <sub>3</sub>                 | CH <sub>3</sub>     | 0.25 <sup>f</sup>                 | 31.30     | CF <sub>3</sub>     | 131.7 <sup>f</sup>                | 34.52     | -66.1                             | 242.83    |
|                                    |                     |                                   |           | CH <sub>3</sub>     | -5.2 <sup>f</sup>                 | 188.48    |                                   |           |
| PhCF <sub>2</sub> H                | CF <sub>2</sub> H   | 6.70 <sup>g</sup>                 | 24.72     |                     |                                   |           | -110.8 <sup>h</sup>               | 279.07    |

a. Ref.<sup>8</sup>; b. Determined in CDCl<sub>3</sub>; c. Ref.<sup>9</sup>; d. Ref.<sup>10</sup>; e. Ref.<sup>11</sup>; f. Ref.<sup>12</sup>; g. Ref.<sup>13</sup>; h. Ref.<sup>14</sup>.

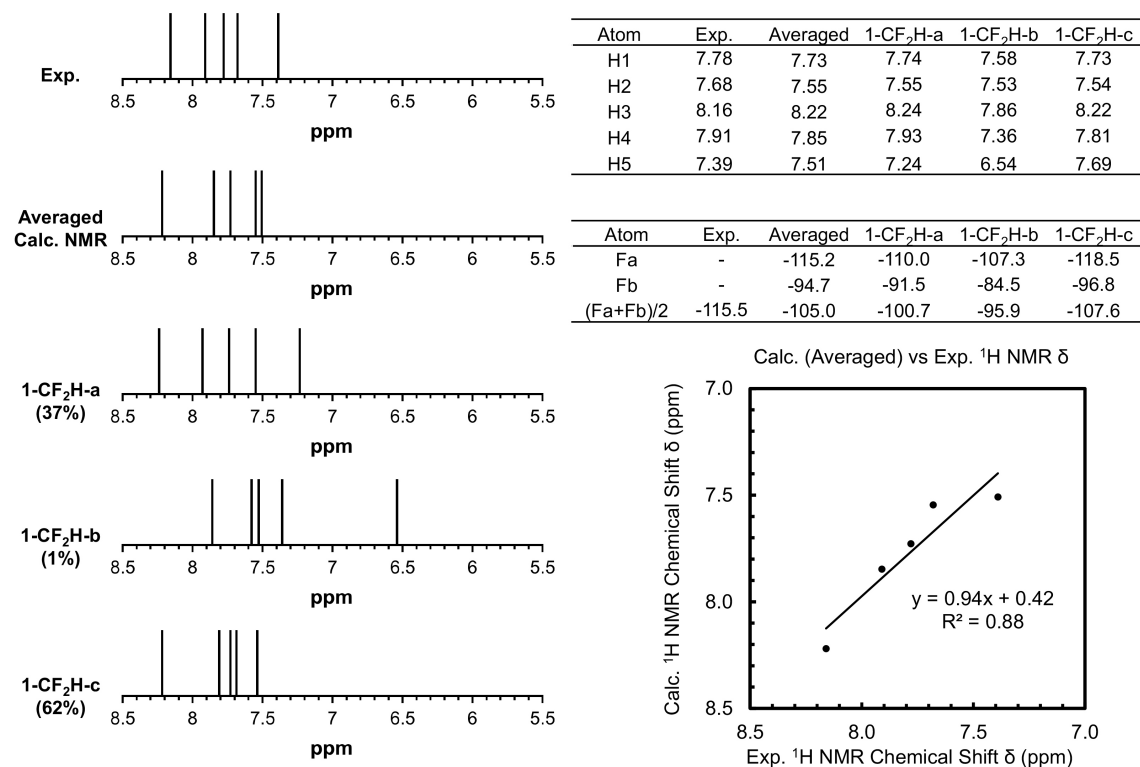

**Figure S29.** Calculated <sup>1</sup>H and <sup>19</sup>F NMR chemical shifts of conformers of **1-CF<sub>2</sub>H** and their correlation with experimental data.

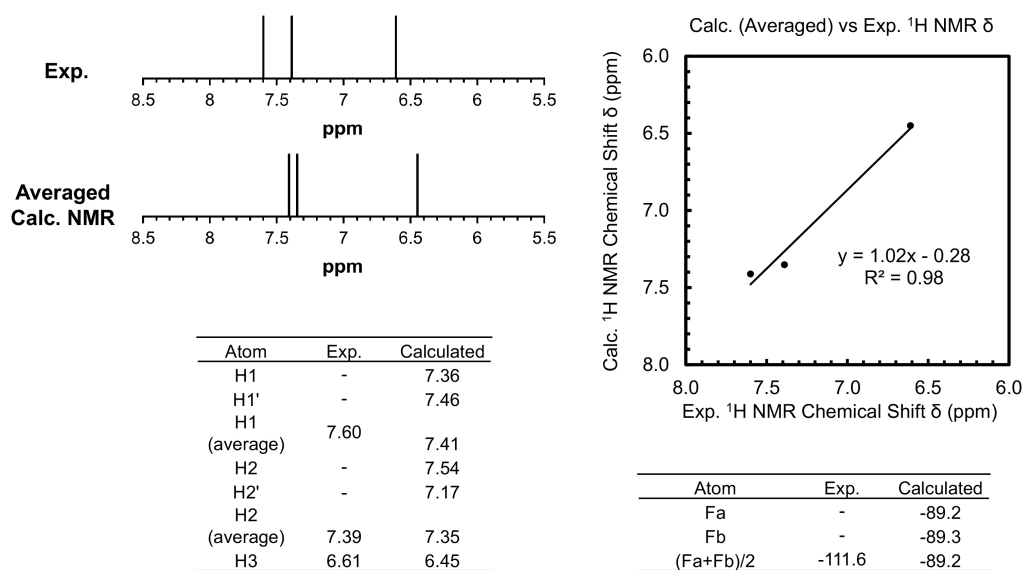

**Figure S30.** Calculated <sup>1</sup>H and <sup>19</sup>F NMR chemical shifts of **2-CF<sub>2</sub>H** and their correlation with experimental data.

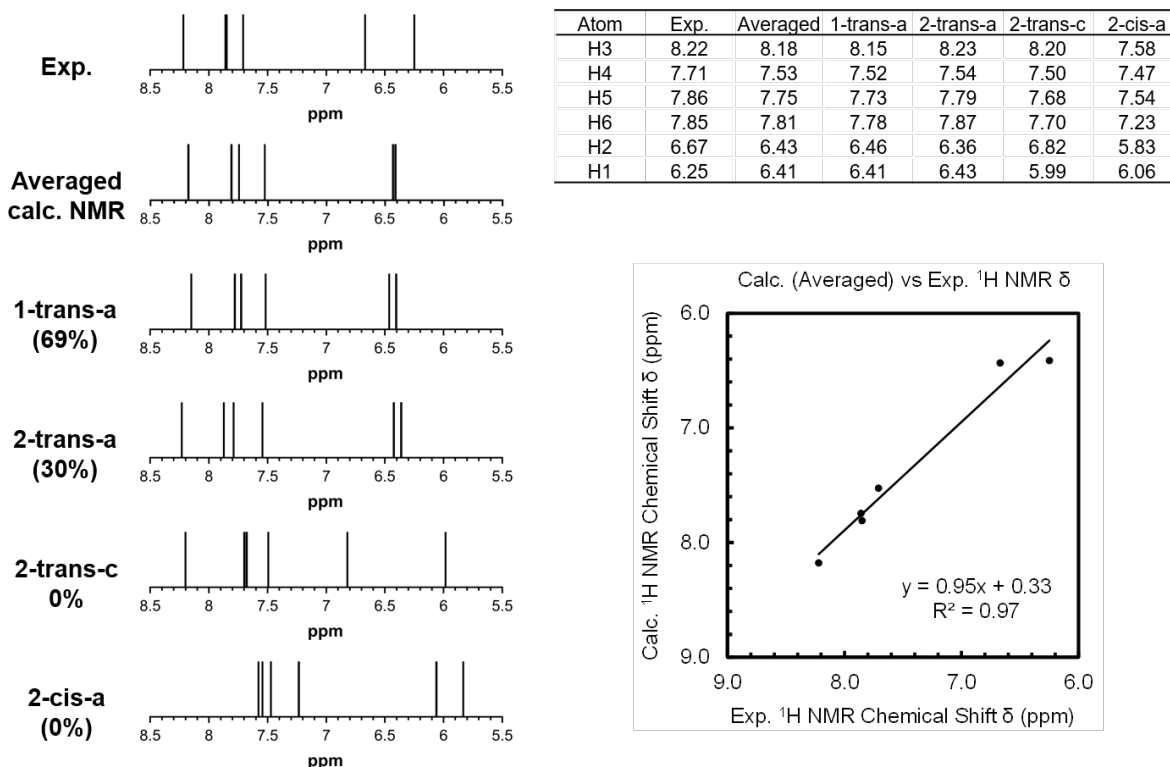

**Figure S31.** Calculated  $^1\text{H}$  NMR chemical shifts of conformers of  $4\text{-NO}_2$  and their correlation with experimental data.

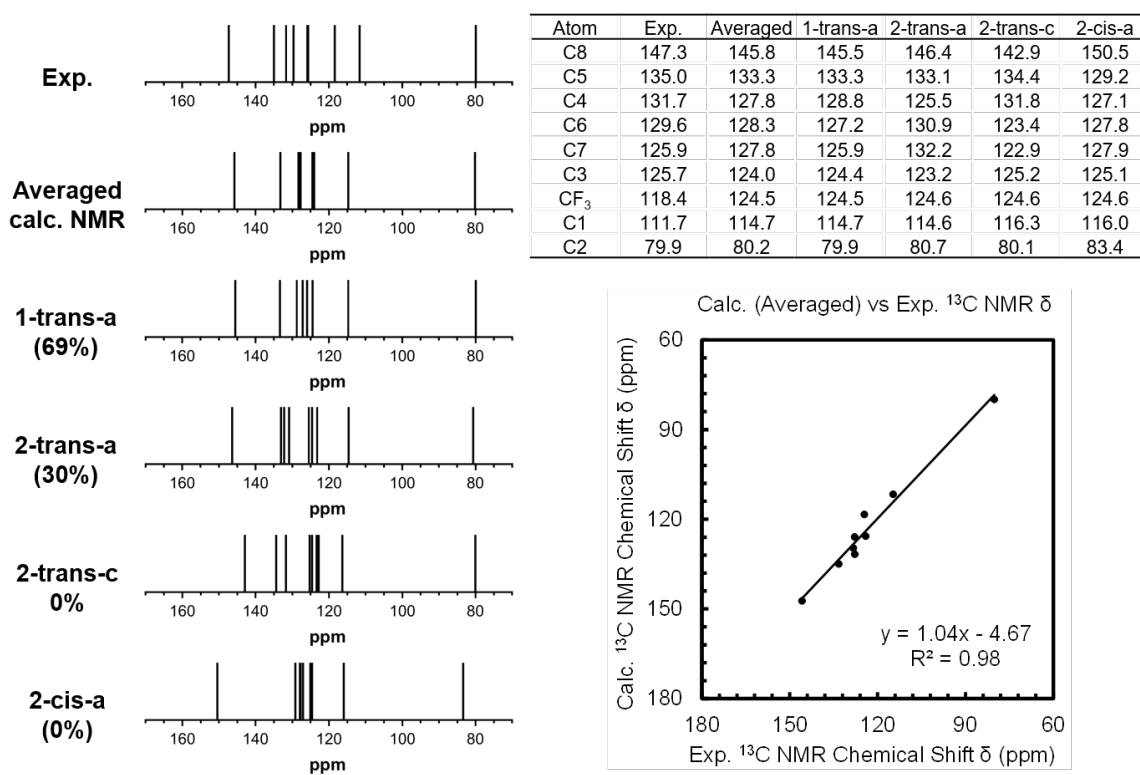

**Figure S32.** Calculated  $^{13}\text{C}$  NMR chemical shifts of conformers of  $4\text{-NO}_2$  and their correlation with experimental data.



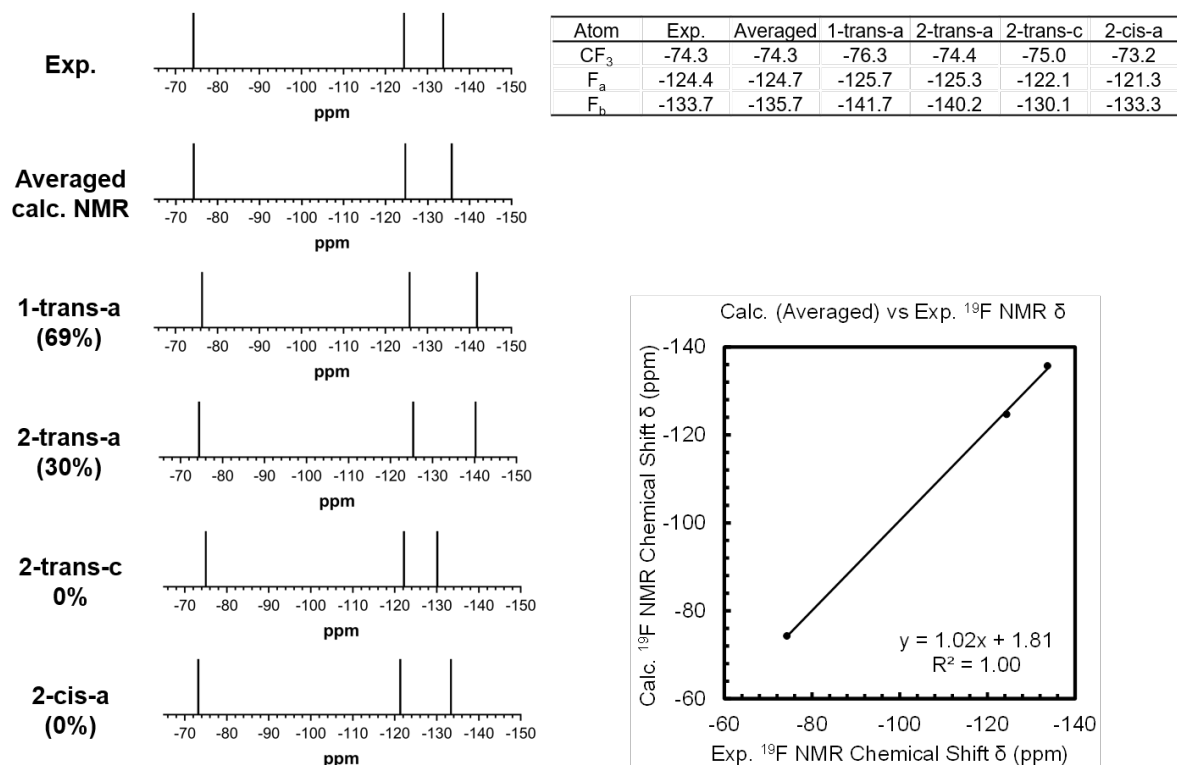

**Figure S33.** Calculated <sup>19</sup>F NMR chemical shifts of conformers of **4-NO<sub>2</sub>** and their correlation with experimental data.

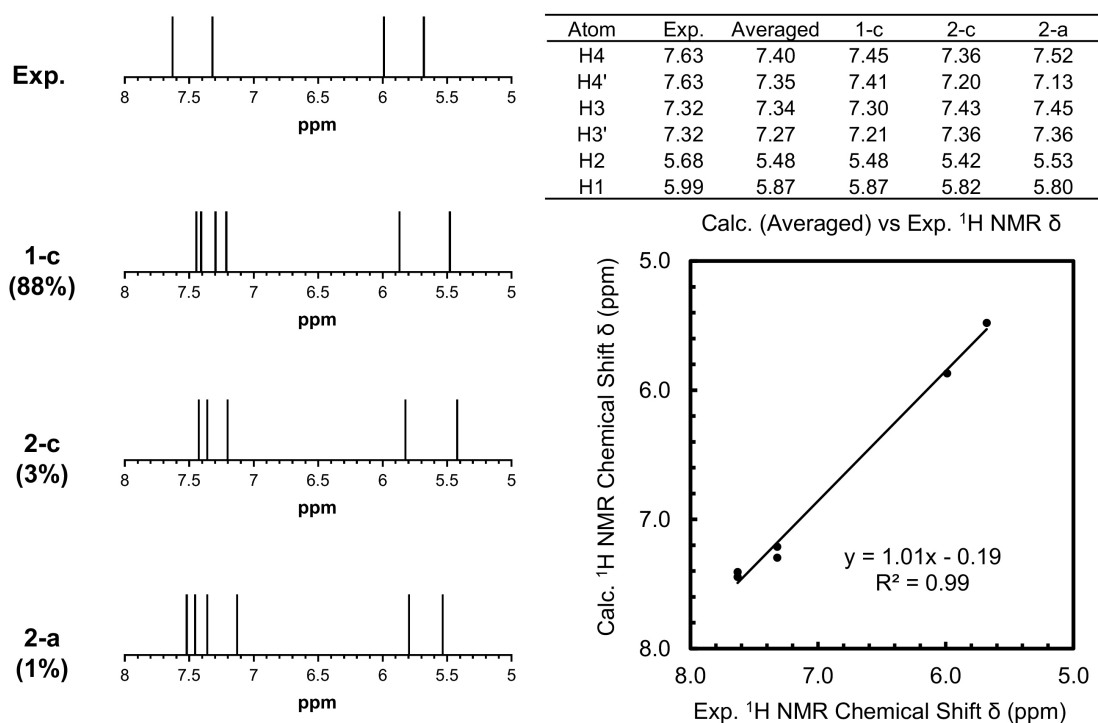

**Figure S34.** Calculated <sup>1</sup>H NMR chemical shifts of conformers of **4-Br** and their correlation with experimental data.

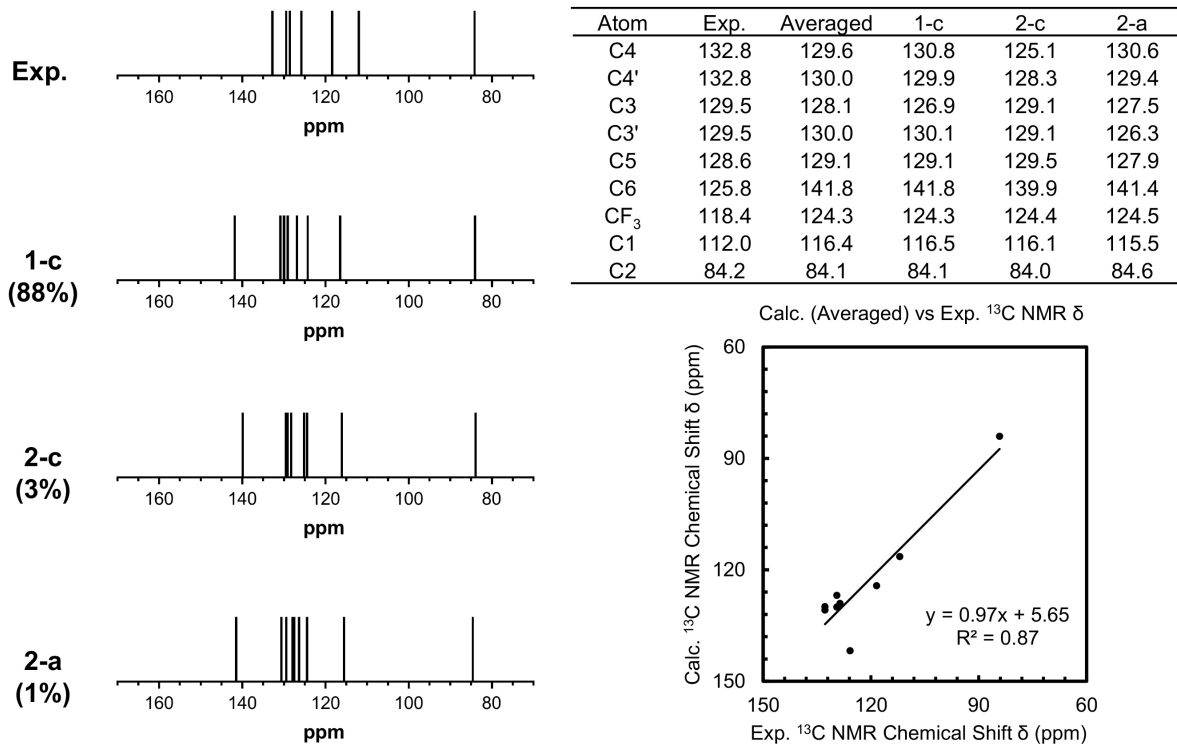

**Figure S35.** Calculated <sup>13</sup>C NMR chemical shifts of conformers of **4-Br** and their correlation with experimental data.

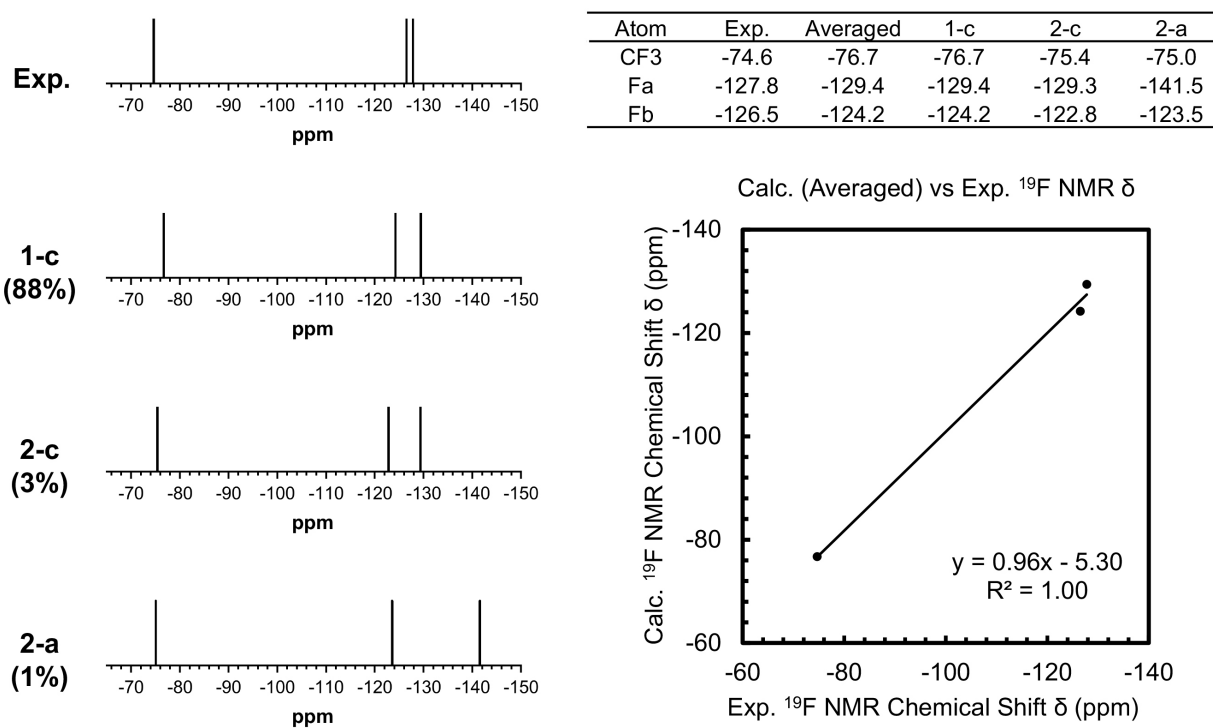

**Figure S36.** Calculated <sup>19</sup>F NMR chemical shifts of conformers of **4-Br** and their correlation with experimental data.

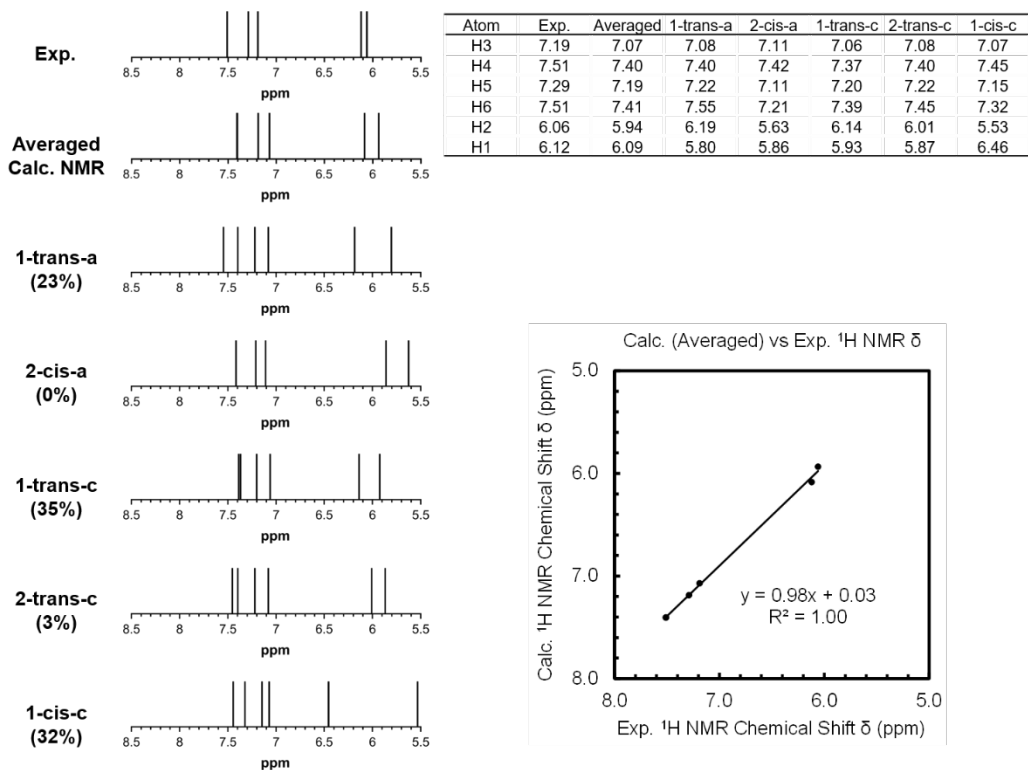

**Figure S37.** Calculated  $^1\text{H}$  NMR chemical shifts of conformers of **4-F** and their correlation with experimental data.

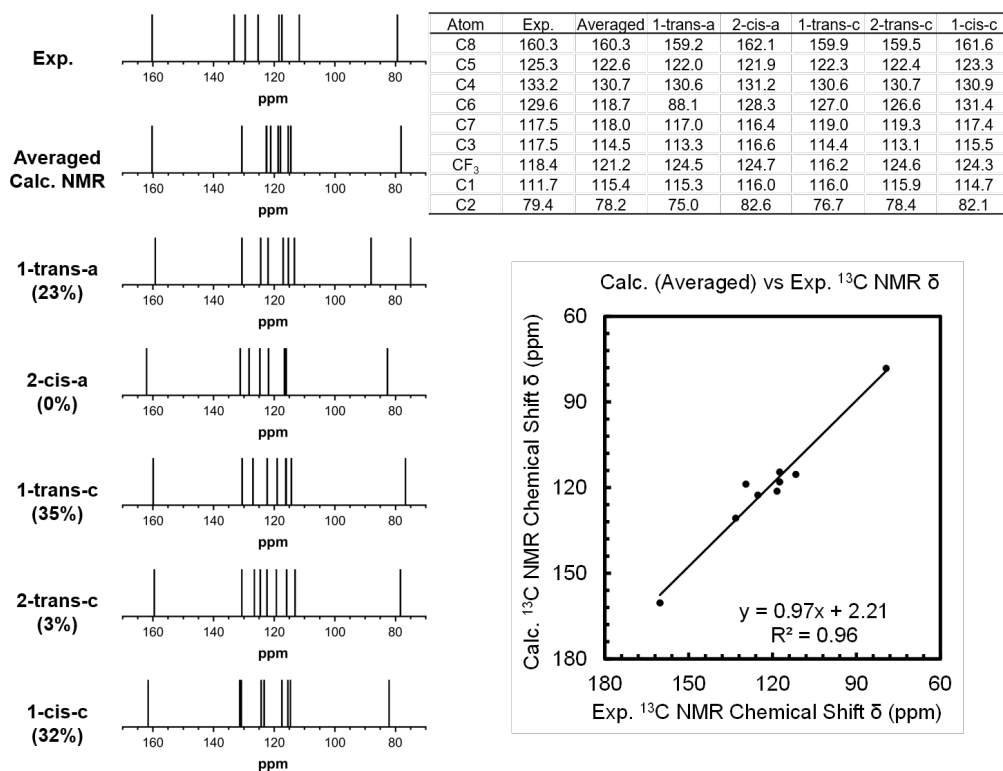

**Figure S38.** Calculated  $^{13}\text{C}$  NMR chemical shifts of conformers of **4-F** and their correlation with experimental data.

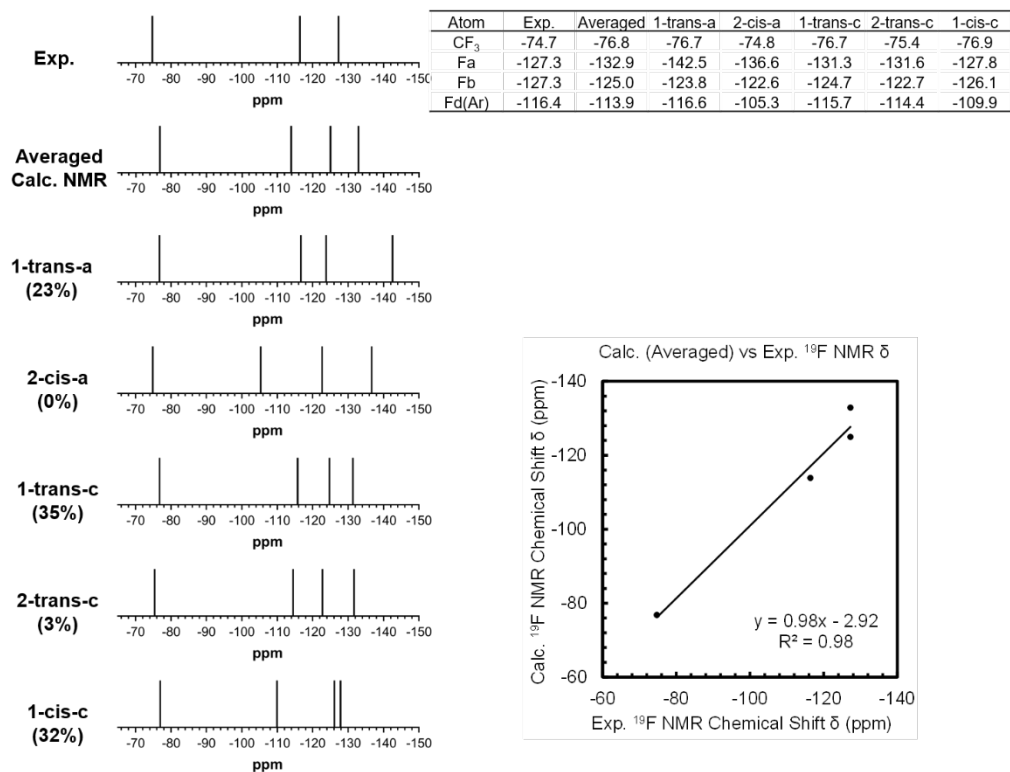

**Figure S39.** Calculated <sup>19</sup>F NMR chemical shifts of conformers of **4-F** and their correlation with experimental data.

### 5.3. Simulated IR Spectra

IR frequencies were calculated at the PCM-B3LYP/6-31+G(d,p) level of theory using Gaussian 09.<sup>5</sup> The default weighting scheme in Gaussian 09 (SSweight) was used for DFT numerical integration calculations. To account for anharmonic effects, a scaling factor of 0.95 was adopted. Selected experimental and calculated vibrational frequencies of the CF<sub>2</sub>-H and CF<sub>2</sub>-D bonds are listed in Table S13. The predicted  $\nu_{\text{CF}_2\text{-H/D}}$  values of major conformers are in good agreement with experimental results (< 20 cm<sup>-1</sup>). For the experimental  $\nu_{\text{CF}_2\text{-D}}$ , which shows two bands due to Fermi resonance, the average value of the two bands is given in brackets.

**Table S13.** Selected experimental and calculated vibrational frequencies of the CF<sub>2</sub>-H and CF<sub>2</sub>-D bonds.

| Species                                    | Optimized structure                                                                 | Calc. $\nu_{\text{CF}_2\text{-H}}$ (cm <sup>-1</sup> ) | Calc. $\nu_{\text{CF}_2\text{-D}}$ (cm <sup>-1</sup> ) | Scaled Calc. $\nu_{\text{CF}_2\text{-H}}$ (cm <sup>-1</sup> ) | Scaled Calc. $\nu_{\text{CF}_2\text{-D}}$ (cm <sup>-1</sup> ) | Scaled Calc. $\nu_{\text{H-V}_D}$ (cm <sup>-1</sup> ) | Scaled Calc. $\nu_{\text{H/V}_D}$ (cm <sup>-1</sup> ) | Exp. $\nu_{\text{CF}_2\text{-H}}$ (cm <sup>-1</sup> ) | Exp. $\nu_{\text{CF}_2\text{-D}}$ (cm <sup>-1</sup> ) | Exp. $\nu_{\text{H-V}_D}$ (cm <sup>-1</sup> ) | Exp. $\nu_{\text{H/V}_D}$ (cm <sup>-1</sup> ) |
|--------------------------------------------|-------------------------------------------------------------------------------------|--------------------------------------------------------|--------------------------------------------------------|---------------------------------------------------------------|---------------------------------------------------------------|-------------------------------------------------------|-------------------------------------------------------|-------------------------------------------------------|-------------------------------------------------------|-----------------------------------------------|-----------------------------------------------|
| TMSCF <sub>2</sub> H                       | 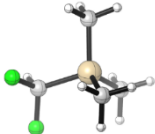   | 3076                                                   | 2266                                                   | 2922                                                          | 2153                                                          | 770                                                   | 1.36                                                  | 2899                                                  | 2167                                                  | 735                                           | 1.34                                          |
| 1-CF <sub>2</sub> H-a (79%)                |    | 3186                                                   | 2348                                                   | 3026                                                          | 2231                                                          | 796                                                   | 1.36                                                  | 3013                                                  | 2237, 2276 [2257]                                     | 776                                           | 1.33                                          |
| 1-CF <sub>2</sub> H-b (0%)                 |   | 3126                                                   | 2306                                                   | 2970                                                          | 2190                                                          | 780                                                   | 1.36                                                  | 3013                                                  | 2237, 2276 [2257]                                     | 776                                           | 1.33                                          |
| 1-CF <sub>2</sub> H-c (21%)                |  | 3192                                                   | 2354                                                   | 3032                                                          | 2236                                                          | 796                                                   | 1.36                                                  | 3013                                                  | 2237, 2276 [2257]                                     | 776                                           | 1.33                                          |
| (CF <sub>2</sub> HNbA) <sub>2</sub> (0%)   |  | 3190                                                   | 2352                                                   | 3030                                                          | 2234                                                          | 796                                                   | 1.36                                                  | 3013                                                  | 2237, 2276 [2257]                                     | 776                                           | 1.33                                          |
| (CF <sub>2</sub> HNbA) <sub>2</sub> ' (0%) |  | 3195                                                   | 2355                                                   | 3035                                                          | 2237                                                          | 798                                                   | 1.36                                                  | 3013                                                  | 2237, 2276 [2257]                                     | 776                                           | 1.33                                          |
| NO <sub>2</sub> -1-trans-a (69%)           |  | 3167                                                   | 2335                                                   | 3009                                                          | 2219                                                          | 790                                                   | 1.36                                                  | 3008                                                  | 2200, 2260 [2230]                                     | 813                                           | 1.35                                          |
| NO <sub>2</sub> -1-trans-b (0%)            |  | 3138                                                   | 2315                                                   | 2981                                                          | 2199                                                          | 782                                                   | 1.36                                                  | 3008                                                  | 2200, 2260 [2230]                                     | 813                                           | 1.35                                          |
| NO <sub>2</sub> -1-trans-c (0%)            |  | 3130                                                   | 2309                                                   | 2974                                                          | 2193                                                          | 780                                                   | 1.36                                                  | 3008                                                  | 2200, 2260 [2230]                                     | 813                                           | 1.35                                          |
| NO <sub>2</sub> -2-trans-a (30%)           |  | 3167                                                   | 2335                                                   | 3009                                                          | 2219                                                          | 790                                                   | 1.36                                                  | 3008                                                  | 2200, 2260 [2230]                                     | 813                                           | 1.35                                          |

|                                          |                                                                                     |               |      |               |      |     |      |      |                         |     |      |
|------------------------------------------|-------------------------------------------------------------------------------------|---------------|------|---------------|------|-----|------|------|-------------------------|-----|------|
| <b>NO<sub>2</sub>-2-trans-b<br/>(0%)</b> | 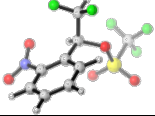   | 3140          | 2317 | 2983          | 2201 | 783 | 1.36 | 3008 | 2200,<br>2260<br>[2230] | 813 | 1.35 |
| <b>NO<sub>2</sub>-2-trans-c<br/>(0%)</b> |    | 3129          | 2308 | 2972          | 2192 | 780 | 1.36 | 3008 | 2200,<br>2260<br>[2230] | 813 | 1.35 |
| <b>Br-1-a<br/>(3%)</b>                   |    | 3129          | 2307 | 2973          | 2192 | 781 | 1.36 | 2972 | 2206                    | 766 | 1.33 |
| <b>Br-1-b<br/>(3%)</b>                   |    | 3139          | 2315 | 2982          | 2199 | 783 | 1.36 | 2972 | 2206                    | 766 | 1.33 |
| <b>Br-1-c<br/>(88%)</b>                  |    | 3141          | 2316 | 2984          | 2200 | 784 | 1.36 | 2972 | 2206                    | 766 | 1.33 |
| <b>F-1-trans-a<br/>(23%)</b>             |    | 3127/<br>3132 | -    | 2970/<br>2976 | -    | -   | -    | 2971 | -                       | -   | -    |
| <b>F-1-trans-b<br/>(2%)</b>              |   | 3142/<br>3132 | -    | 2985/<br>2976 | -    | -   | -    | 2971 | -                       | -   | -    |
| <b>F-1-trans-c<br/>(35%)</b>             |  | 3133/<br>3144 | -    | 2977/<br>2987 | -    | -   | -    | 2971 | -                       | -   | -    |
| <b>F-1-cis-a<br/>(0%)</b>                |  | 3125<br>/3114 | -    | 2969/<br>2959 | -    | -   | -    | 2971 | -                       | -   | -    |
| <b>F-1-cis-b<br/>(0%)</b>                |  | 3137          | -    | 2980          | -    | -   | -    | 2971 | -                       | -   | -    |
| <b>F-1-cis-c<br/>(32%)</b>               |  | 3168          | -    | 3010          | -    | -   | -    | 2971 | -                       | -   | -    |

## 5.4. Optimized Coordinates of Conformers

### 5.4.1. Optimized Coordinates of Conformers of 1-(2-Nitrophenyl)-2,2-difluoroethanol Triflate (4-NO<sub>2</sub>)

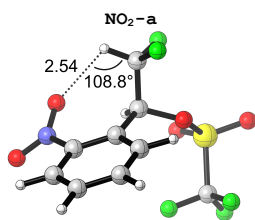

Standard orientation:

| Center Number | Atomic Number | Atomic Type | Coordinates (Angstroms) |           |           |
|---------------|---------------|-------------|-------------------------|-----------|-----------|
|               |               |             | X                       | Y         | Z         |
| 1             | 6             | 0           | 0.631691                | 2.366933  | -0.627212 |
| 2             | 9             | 0           | 0.656246                | 2.367800  | -1.999715 |
| 3             | 9             | 0           | -0.361543               | 3.230854  | -0.242860 |
| 4             | 8             | 0           | -0.977031               | 0.591474  | -0.683034 |
| 5             | 6             | 0           | 0.310336                | 0.963610  | -0.095323 |
| 6             | 6             | 0           | 1.344793                | -0.078235 | -0.488660 |
| 7             | 6             | 0           | 2.443398                | -0.444523 | 0.315361  |
| 8             | 6             | 0           | 1.200840                | -0.750861 | -1.708717 |
| 9             | 6             | 0           | 3.343574                | -1.443150 | -0.064426 |
| 10            | 6             | 0           | 2.105082                | -1.735645 | -2.109477 |
| 11            | 1             | 0           | 0.360384                | -0.506034 | -2.346789 |
| 12            | 6             | 0           | 3.177853                | -2.086121 | -1.287139 |
| 13            | 1             | 0           | 4.165263                | -1.690276 | 0.595918  |
| 14            | 1             | 0           | 1.965638                | -2.229339 | -3.065557 |
| 15            | 1             | 0           | 3.882724                | -2.851352 | -1.593557 |
| 16            | 8             | 0           | 2.272615                | 1.364317  | 1.762192  |
| 17            | 1             | 0           | 1.586503                | 2.739771  | -0.255647 |
| 18            | 1             | 0           | 0.196919                | 1.046894  | 0.984400  |
| 19            | 16            | 0           | -2.290896               | 0.390257  | 0.251852  |
| 20            | 8             | 0           | -2.031880               | 0.839056  | 1.612639  |
| 21            | 8             | 0           | -3.432628               | 0.830328  | -0.527259 |
| 22            | 7             | 0           | 2.709529                | 0.217359  | 1.598417  |
| 23            | 8             | 0           | 3.364398                | -0.390750 | 2.443652  |
| 24            | 6             | 0           | -2.350763               | -1.496972 | 0.294547  |
| 25            | 9             | 0           | -3.393880               | -1.867475 | 1.037979  |
| 26            | 9             | 0           | -2.485482               | -1.977337 | -0.941182 |
| 27            | 9             | 0           | -1.223609               | -1.967275 | 0.837274  |

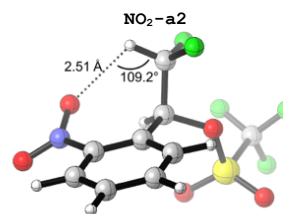

Standard orientation:

| Center Number | Atomic Number | Atomic Type | Coordinates (Angstroms) |           |           |
|---------------|---------------|-------------|-------------------------|-----------|-----------|
|               |               |             | X                       | Y         | Z         |
| 1             | 6             | 0           | 0.277449                | -1.583644 | 1.482492  |
| 2             | 9             | 0           | 0.339814                | -0.989699 | 2.718789  |
| 3             | 9             | 0           | -0.909100               | -2.267804 | 1.424722  |
| 4             | 8             | 0           | -0.820638               | 0.361043  | 0.663586  |
| 5             | 6             | 0           | 0.309224                | -0.522031 | 0.374933  |
| 6             | 6             | 0           | 1.601264                | 0.282339  | 0.358687  |
| 7             | 6             | 0           | 2.729924                | -0.046007 | -0.420527 |
| 8             | 6             | 0           | 1.685784                | 1.442782  | 1.137439  |
| 9             | 6             | 0           | 3.878025                | 0.749816  | -0.439300 |
| 10            | 6             | 0           | 2.835509                | 2.234337  | 1.144748  |
| 11            | 1             | 0           | 0.831201                | 1.735295  | 1.735245  |
| 12            | 6             | 0           | 3.934044                | 1.891309  | 0.354251  |
| 13            | 1             | 0           | 4.712064                | 0.456302  | -1.064165 |
| 14            | 1             | 0           | 2.866356                | 3.122055  | 1.767887  |
| 15            | 1             | 0           | 4.828583                | 2.504551  | 0.354213  |
| 16            | 8             | 0           | 2.014408                | -2.192970 | -0.941572 |
| 17            | 1             | 0           | 1.098401                | -2.294640 | 1.389275  |
| 18            | 1             | 0           | 0.137534                | -1.027721 | -0.573397 |
| 19            | 16            | 0           | -1.698149               | 0.989486  | -0.551357 |
| 20            | 8             | 0           | -2.044936               | 2.345647  | -0.166084 |
| 21            | 8             | 0           | -1.101137               | 0.658248  | -1.838356 |
| 22            | 7             | 0           | 2.763953                | -1.256278 | -1.249972 |
| 23            | 8             | 0           | 3.542497                | -1.291532 | -2.201372 |
| 24            | 6             | 0           | -3.267473               | -0.048222 | -0.371777 |
| 25            | 9             | 0           | -4.157436               | 0.395869  | -1.261971 |
| 26            | 9             | 0           | -2.988772               | -1.328495 | -0.617105 |
| 27            | 9             | 0           | -3.759560               | 0.081102  | 0.858584  |

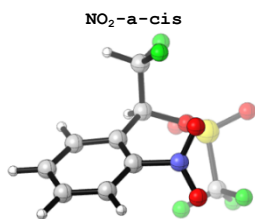

Standard orientation:

| Center Number | Atomic Number | Atomic Type | Coordinates (Angstroms) |           |           |
|---------------|---------------|-------------|-------------------------|-----------|-----------|
|               |               |             | X                       | Y         | Z         |
| 1             | 6             | 0           | -0.691579               | 2.581744  | 0.087975  |
| 2             | 9             | 0           | -1.111334               | 2.587462  | 1.383037  |
| 3             | 9             | 0           | 0.479984                | 3.300413  | 0.036974  |
| 4             | 8             | 0           | 0.633560                | 0.560272  | 0.355319  |
| 5             | 6             | 0           | -0.412993               | 1.166715  | -0.446379 |
| 6             | 6             | 0           | -1.642811               | 0.281135  | -0.549792 |
| 7             | 6             | 0           | -2.411896               | 0.443117  | -1.712360 |
| 8             | 6             | 0           | -2.067244               | -0.703963 | 0.355751  |
| 9             | 6             | 0           | -3.563713               | -0.308336 | -1.944903 |
| 10            | 6             | 0           | -3.189487               | -1.498230 | 0.116042  |
| 11            | 6             | 0           | -3.953975               | -1.285931 | -1.028704 |
| 12            | 1             | 0           | -4.137526               | -0.143829 | -2.850771 |
| 13            | 1             | 0           | -3.459663               | -2.261793 | 0.836165  |
| 14            | 1             | 0           | -4.838401               | -1.888575 | -1.205097 |
| 15            | 1             | 0           | -1.438422               | 3.095175  | -0.523699 |
| 16            | 1             | 0           | -0.026888               | 1.316154  | -1.458525 |
| 17            | 16            | 0           | 2.151661                | 0.431457  | -0.235418 |
| 18            | 8             | 0           | 2.214608                | 0.952516  | -1.595276 |
| 19            | 8             | 0           | 3.069034                | 0.839224  | 0.810993  |
| 20            | 6             | 0           | 2.249026                | -1.451871 | -0.353263 |
| 21            | 9             | 0           | 3.442699                | -1.769783 | -0.857923 |
| 22            | 9             | 0           | 2.110322                | -1.992579 | 0.853349  |
| 23            | 9             | 0           | 1.287027                | -1.898607 | -1.164259 |
| 24            | 1             | 0           | -2.090338               | 1.164391  | -2.458424 |
| 25            | 7             | 0           | -1.368857               | -0.978337 | 1.628999  |
| 26            | 8             | 0           | -1.080923               | -2.153698 | 1.864983  |
| 27            | 8             | 0           | -1.164226               | -0.038930 | 2.391137  |

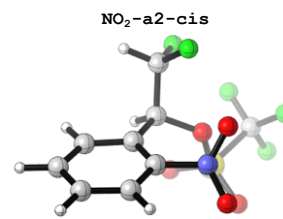

Standard orientation:

| Center Number | Atomic Number | Atomic Type | Coordinates (Angstroms) |           |           |
|---------------|---------------|-------------|-------------------------|-----------|-----------|
|               |               |             | X                       | Y         | Z         |
| 1             | 6             | 0           | -0.261138               | 2.235611  | 0.648438  |
| 2             | 9             | 0           | -0.486311               | 1.946326  | 1.959582  |
| 3             | 9             | 0           | 1.028177                | 2.703458  | 0.553122  |
| 4             | 8             | 0           | 0.502275                | -0.018415 | 0.194937  |
| 5             | 6             | 0           | -0.407706               | 1.011954  | -0.270032 |
| 6             | 6             | 0           | -1.834032               | 0.505745  | -0.419780 |
| 7             | 6             | 0           | -2.622216               | 1.160963  | -1.378064 |
| 8             | 6             | 0           | -2.427062               | -0.573483 | 0.254136  |
| 9             | 6             | 0           | -3.942208               | 0.786035  | -1.628166 |
| 10            | 6             | 0           | -3.730491               | -0.991963 | -0.016588 |
| 11            | 6             | 0           | -4.499289               | -0.297240 | -0.947493 |
| 12            | 1             | 0           | -4.521297               | 1.325299  | -2.370332 |
| 13            | 1             | 0           | -4.132572               | -1.846360 | 0.515404  |
| 14            | 1             | 0           | -5.519168               | -0.609675 | -1.144411 |
| 15            | 1             | 0           | -0.940605               | 3.036420  | 0.344555  |
| 16            | 1             | 0           | -0.072665               | 1.350998  | -1.254687 |
| 17            | 16            | 0           | 1.540272                | -0.733135 | -0.845120 |
| 18            | 8             | 0           | 1.424331                | -2.168817 | -0.668002 |
| 19            | 8             | 0           | 1.468865                | -0.092723 | -2.153136 |
| 20            | 6             | 0           | 3.169605                | -0.218690 | -0.032427 |
| 21            | 9             | 0           | 4.149719                | -0.890666 | -0.641660 |
| 22            | 9             | 0           | 3.361963                | 1.089005  | -0.186146 |
| 23            | 9             | 0           | 3.148753                | -0.528421 | 1.261280  |
| 24            | 7             | 0           | -1.730536               | -1.346162 | 1.304438  |
| 25            | 8             | 0           | -1.715028               | -2.571453 | 1.177838  |
| 26            | 8             | 0           | -1.261988               | -0.731850 | 2.258170  |
| 27            | 1             | 0           | -2.185395               | 1.971772  | -1.953865 |

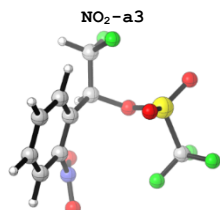

Standard orientation:

| Center Number | Atomic Number | Atomic Type | Coordinates (Angstroms) |           |           |
|---------------|---------------|-------------|-------------------------|-----------|-----------|
|               |               |             | X                       | Y         | Z         |
| 1             | 6             | 0           | 0.290841                | 2.623852  | 0.872501  |
| 2             | 9             | 0           | -0.267341               | 3.028823  | -0.317711 |
| 3             | 9             | 0           | -0.579000               | 2.999044  | 1.861689  |
| 4             | 8             | 0           | -0.823485               | 0.433975  | 0.765632  |
| 5             | 6             | 0           | 0.474519                | 1.108008  | 0.926858  |
| 6             | 6             | 0           | 1.582600                | 0.535048  | 0.060497  |
| 7             | 6             | 0           | 2.107070                | -0.762042 | 0.258184  |
| 8             | 6             | 0           | 2.135815                | 1.280187  | -0.988238 |
| 9             | 6             | 0           | 3.119481                | -1.284574 | -0.546475 |
| 10            | 6             | 0           | 3.170686                | 0.780149  | -1.782107 |
| 11            | 1             | 0           | 1.741913                | 2.262855  | -1.213862 |
| 12            | 6             | 0           | 3.665586                | -0.503949 | -1.563119 |
| 13            | 1             | 0           | 3.477763                | -2.288809 | -0.358168 |
| 14            | 1             | 0           | 3.575582                | 1.395939  | -2.578291 |
| 15            | 1             | 0           | 4.465545                | -0.902485 | -2.177588 |
| 16            | 8             | 0           | 1.681035                | -2.871765 | 1.120013  |
| 17            | 1             | 0           | 0.686628                | 0.877939  | 1.969981  |
| 18            | 16            | 0           | -1.693931               | 0.343249  | -0.609188 |
| 19            | 8             | 0           | -2.880151               | 1.175782  | -0.495815 |
| 20            | 8             | 0           | -0.850248               | 0.361785  | -1.795741 |
| 21            | 7             | 0           | 1.629333                | -1.660575 | 1.329575  |
| 22            | 8             | 0           | 1.230330                | -1.165243 | 2.387640  |
| 23            | 6             | 0           | -2.251750               | -1.440028 | -0.326244 |
| 24            | 9             | 0           | -2.913654               | -1.541487 | 0.824712  |
| 25            | 9             | 0           | -3.057801               | -1.773889 | -1.338035 |
| 26            | 9             | 0           | -1.194404               | -2.253663 | -0.313509 |
| 27            | 1             | 0           | 1.230988                | 3.160963  | 1.018663  |

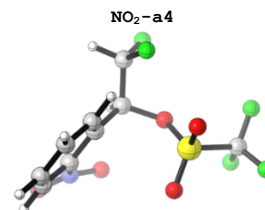

Standard orientation:

| Center Number | Atomic Number | Atomic Type | Coordinates (Angstroms) |           |           |
|---------------|---------------|-------------|-------------------------|-----------|-----------|
|               |               |             | X                       | Y         | Z         |
| 1             | 6             | 0           | 0.208506                | 2.305220  | 1.180713  |
| 2             | 9             | 0           | -0.420180               | 2.914525  | 0.126368  |
| 3             | 9             | 0           | -0.625752               | 2.438261  | 2.263193  |
| 4             | 8             | 0           | -0.848070               | 0.184740  | 0.665076  |
| 5             | 6             | 0           | 0.454067                | 0.812376  | 0.937039  |
| 6             | 6             | 0           | 1.556836                | 0.493209  | -0.056635 |
| 7             | 6             | 0           | 2.477514                | -0.562414 | 0.132099  |
| 8             | 6             | 0           | 1.744709                | 1.296369  | -1.190518 |
| 9             | 6             | 0           | 3.522756                | -0.803885 | -0.758109 |
| 10            | 6             | 0           | 2.776217                | 1.051251  | -2.100297 |
| 11            | 1             | 0           | 1.069042                | 2.121541  | -1.375860 |
| 12            | 6             | 0           | 3.666441                | 0.000275  | -1.887017 |
| 13            | 1             | 0           | 4.201075                | -1.625147 | -0.564232 |
| 14            | 1             | 0           | 2.877438                | 1.687095  | -2.973460 |
| 15            | 1             | 0           | 4.468130                | -0.197862 | -2.590200 |
| 16            | 8             | 0           | 3.431152                | -2.010115 | 1.671678  |
| 17            | 1             | 0           | 0.704532                | 0.399355  | 1.912545  |
| 18            | 16            | 0           | -1.357581               | -0.328767 | -0.785591 |
| 19            | 8             | 0           | -1.548013               | 0.771421  | -1.721888 |
| 20            | 8             | 0           | -0.660041               | -1.540872 | -1.194745 |
| 21            | 7             | 0           | 2.387881                | -1.487594 | 1.276069  |
| 22            | 8             | 0           | 1.278329                | -1.703642 | 1.770877  |
| 23            | 6             | 0           | -3.057530               | -0.834858 | -0.130525 |
| 24            | 9             | 0           | -3.736840               | -1.341466 | -1.164309 |
| 25            | 9             | 0           | -2.933417               | -1.760728 | 0.818126  |
| 26            | 9             | 0           | -3.703258               | 0.226011  | 0.350539  |
| 27            | 1             | 0           | 1.136972                | 2.841506  | 1.394437  |

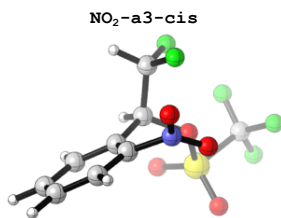

Standard orientation:

| Center Number | Atomic Number | Atomic Type | Coordinates (Angstroms) |           |           |
|---------------|---------------|-------------|-------------------------|-----------|-----------|
|               |               |             | X                       | Y         | Z         |
| 1             | 6             | 0           | 0.409870                | 1.343680  | 1.692765  |
| 2             | 9             | 0           | 0.778515                | 2.373511  | 0.868958  |
| 3             | 9             | 0           | -0.830482               | 1.649870  | 2.189411  |
| 4             | 8             | 0           | -0.632864               | 0.168592  | -0.128103 |
| 5             | 6             | 0           | 0.338655                | 0.007077  | 0.947345  |
| 6             | 6             | 0           | 1.681458                | -0.536053 | 0.486359  |
| 7             | 6             | 0           | 2.107454                | -1.719586 | 1.109203  |
| 8             | 6             | 0           | 2.588850                | 0.060057  | -0.413583 |
| 9             | 6             | 0           | 3.355187                | -2.289651 | 0.849729  |
| 10            | 6             | 0           | 3.847415                | -0.483603 | -0.665724 |
| 11            | 6             | 0           | 4.229953                | -1.669556 | -0.040201 |
| 12            | 1             | 0           | 3.636704                | -3.212249 | 1.346154  |
| 13            | 1             | 0           | 4.510351                | 0.019587  | -1.359625 |
| 14            | 1             | 0           | 5.203089                | -2.099444 | -0.251925 |
| 15            | 1             | 0           | -0.071124               | -0.703947 | 1.668340  |
| 16            | 16            | 0           | -1.715637               | -1.004338 | -0.425762 |
| 17            | 8             | 0           | -1.618493               | -1.386939 | -1.823353 |
| 18            | 8             | 0           | -1.709910               | -1.988240 | 0.652125  |
| 19            | 6             | 0           | -3.284963               | 0.034938  | -0.253831 |
| 20            | 9             | 0           | -3.234518               | 1.075116  | -1.082761 |
| 21            | 9             | 0           | -4.322397               | -0.744211 | -0.571911 |
| 22            | 9             | 0           | -3.414433               | 0.459874  | 1.001930  |
| 23            | 1             | 0           | 1.117166                | 1.295162  | 2.524836  |
| 24            | 7             | 0           | 2.280560                | 1.279514  | -1.190320 |
| 25            | 8             | 0           | 3.132570                | 2.170218  | -1.191454 |
| 26            | 8             | 0           | 1.230362                | 1.312416  | -1.824607 |
| 27            | 1             | 0           | 1.443307                | -2.205948 | 1.816767  |

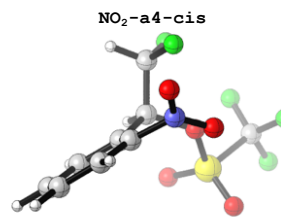

Standard orientation:

| Center Number | Atomic Number | Atomic Type | Coordinates (Angstroms) |           |           |
|---------------|---------------|-------------|-------------------------|-----------|-----------|
|               |               |             | X                       | Y         | Z         |
| 1             | 6             | 0           | 0.409629                | 1.343642  | 1.692865  |
| 2             | 9             | 0           | 0.778668                | 2.373246  | 0.868943  |
| 3             | 9             | 0           | -0.830864               | 1.649980  | 2.188923  |
| 4             | 8             | 0           | -0.632649               | 0.168451  | -0.128229 |
| 5             | 6             | 0           | 0.338646                | 0.006971  | 0.947545  |
| 6             | 6             | 0           | 1.681423                | -0.536104 | 0.486568  |
| 7             | 6             | 0           | 2.107413                | -1.719678 | 1.109356  |
| 8             | 6             | 0           | 2.588762                | 0.060011  | -0.413433 |
| 9             | 6             | 0           | 3.355081                | -2.289804 | 0.849792  |
| 10            | 6             | 0           | 3.847254                | -0.483801 | -0.665722 |
| 11            | 6             | 0           | 4.229775                | -1.669773 | -0.040262 |
| 12            | 1             | 0           | 3.636612                | -3.212408 | 1.346196  |
| 13            | 1             | 0           | 4.510154                | 0.019341  | -1.359688 |
| 14            | 1             | 0           | 5.202855                | -2.099732 | -0.252098 |
| 15            | 1             | 0           | -0.071327               | -0.704086 | 1.668396  |
| 16            | 16            | 0           | -1.715571               | -1.004152 | -0.426162 |
| 17            | 8             | 0           | -1.618608               | -1.386060 | -1.823950 |
| 18            | 8             | 0           | -1.709925               | -1.988528 | 0.651333  |
| 19            | 6             | 0           | -3.284948               | 0.034840  | -0.253601 |
| 20            | 9             | 0           | -4.322306               | -0.744201 | -0.572255 |
| 21            | 9             | 0           | -3.414552               | 0.458938  | 1.002435  |
| 22            | 9             | 0           | -3.234618               | 1.075618  | -1.081835 |
| 23            | 1             | 0           | 1.116633                | 1.295238  | 2.525196  |
| 24            | 7             | 0           | 2.280771                | 1.279653  | -1.190077 |
| 25            | 8             | 0           | 3.133177                | 2.170009  | -1.191187 |
| 26            | 8             | 0           | 1.230556                | 1.313180  | -1.824265 |
| 27            | 1             | 0           | 1.443256                | -2.205969 | 1.816950  |



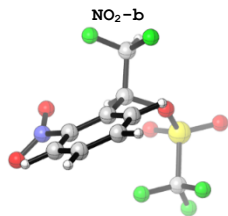

Standard orientation:

| Center Number | Atomic Number | Atomic Type | Coordinates (Angstroms) |           |           |
|---------------|---------------|-------------|-------------------------|-----------|-----------|
|               |               |             | X                       | Y         | Z         |
| 1             | 6             | 0           | -0.663944               | 2.542506  | -0.026194 |
| 2             | 9             | 0           | -1.894672               | 2.751693  | -0.584323 |
| 3             | 9             | 0           | -0.752229               | 2.900720  | 1.296099  |
| 4             | 8             | 0           | 0.996922                | 0.933797  | 0.534039  |
| 5             | 6             | 0           | -0.291359               | 1.054805  | -0.165985 |
| 6             | 6             | 0           | -1.283210               | 0.098176  | 0.466814  |
| 7             | 6             | 0           | -2.173777               | -0.729205 | -0.248765 |
| 8             | 6             | 0           | -1.303345               | -0.007638 | 1.864845  |
| 9             | 6             | 0           | -3.044236               | -1.610224 | 0.398621  |
| 10            | 6             | 0           | -2.178696               | -0.872263 | 2.521855  |
| 11            | 1             | 0           | -0.614088               | 0.594389  | 2.444194  |
| 12            | 6             | 0           | -3.055592               | -1.673552 | 1.788487  |
| 13            | 1             | 0           | -3.706032               | -2.226711 | -0.196011 |
| 14            | 1             | 0           | -2.172066               | -0.916861 | 3.605933  |
| 15            | 1             | 0           | -3.742753               | -2.345706 | 2.290963  |
| 16            | 8             | 0           | -1.866094               | 0.273309  | -2.333660 |
| 17            | 1             | 0           | 0.061751                | 3.200617  | -0.509162 |
| 18            | 1             | 0           | -0.143500               | 0.860177  | -1.225267 |
| 19            | 16            | 0           | 2.345987                | 0.510131  | -0.266957 |
| 20            | 8             | 0           | 2.150015                | 0.635212  | -1.704948 |
| 21            | 8             | 0           | 3.452729                | 1.127969  | 0.439529  |
| 22            | 7             | 0           | -2.240825               | -0.731360 | -1.720929 |
| 23            | 8             | 0           | -2.680230               | -1.741421 | -2.272758 |
| 24            | 6             | 0           | 2.404664                | -1.336293 | 0.130139  |
| 25            | 9             | 0           | 3.483418                | -1.855142 | -0.456369 |
| 26            | 9             | 0           | 2.477163                | -1.515765 | 1.447965  |
| 27            | 9             | 0           | 1.305979                | -1.930093 | -0.344411 |

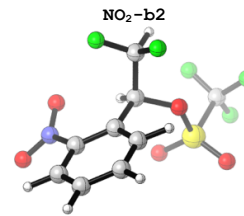

Standard orientation:

| Center Number | Atomic Number | Atomic Type | Coordinates (Angstroms) |           |           |
|---------------|---------------|-------------|-------------------------|-----------|-----------|
|               |               |             | X                       | Y         | Z         |
| 1             | 6             | 0           | -0.200468               | 1.653823  | -1.519640 |
| 2             | 9             | 0           | -1.279127               | 1.585691  | -2.355379 |
| 3             | 9             | 0           | -0.290570               | 2.841896  | -0.837959 |
| 4             | 8             | 0           | 0.908592                | 0.724195  | 0.338557  |
| 5             | 6             | 0           | -0.238442               | 0.464068  | -0.542603 |
| 6             | 6             | 0           | -1.512652               | 0.367485  | 0.276380  |
| 7             | 6             | 0           | -2.549391               | -0.561951 | 0.047434  |
| 8             | 6             | 0           | -1.671946               | 1.242075  | 1.360174  |
| 9             | 6             | 0           | -3.687697               | -0.610249 | 0.856826  |
| 10            | 6             | 0           | -2.810976               | 1.211950  | 2.164855  |
| 11            | 1             | 0           | -0.881631               | 1.949137  | 1.581128  |
| 12            | 6             | 0           | -3.824639               | 0.286355  | 1.911847  |
| 13            | 1             | 0           | -4.452889               | -1.345346 | 0.643319  |
| 14            | 1             | 0           | -2.901243               | 1.911912  | 2.989019  |
| 15            | 1             | 0           | -4.714752               | 0.257266  | 2.530972  |
| 16            | 8             | 0           | -1.767015               | -1.326002 | -2.014898 |
| 17            | 1             | 0           | 0.712854                | 1.673392  | -2.117768 |
| 18            | 1             | 0           | -0.056386               | -0.441032 | -1.115805 |
| 19            | 16            | 0           | 1.794199                | -0.514428 | 0.910431  |
| 20            | 8             | 0           | 2.167463                | -0.180873 | 2.272649  |
| 21            | 8             | 0           | 1.195403                | -1.788968 | 0.539203  |
| 22            | 7             | 0           | -2.500799               | -1.548315 | -1.046345 |
| 23            | 8             | 0           | -3.208105               | -2.551875 | -0.946331 |
| 24            | 6             | 0           | 3.336965                | -0.284138 | -0.155499 |
| 25            | 9             | 0           | 4.212490                | -1.238521 | 0.158977  |
| 26            | 9             | 0           | 3.003490                | -0.387390 | -1.445897 |
| 27            | 9             | 0           | 3.873408                | 0.913370  | 0.072990  |

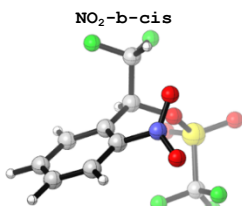

Standard orientation:

| Center Number | Atomic Number | Atomic Type | Coordinates (Angstroms) |           |           |
|---------------|---------------|-------------|-------------------------|-----------|-----------|
|               |               |             | X                       | Y         | Z         |
| 1             | 6             | 0           | -0.788373               | 2.494622  | 0.359820  |
| 2             | 9             | 0           | 0.273956                | 3.360919  | 0.280665  |
| 3             | 9             | 0           | -1.813668               | 3.041018  | -0.374313 |
| 4             | 8             | 0           | 0.699803                | 0.617069  | 0.492671  |
| 5             | 6             | 0           | -0.383002               | 1.173334  | -0.314394 |
| 6             | 6             | 0           | -1.494095               | 0.161218  | -0.513923 |
| 7             | 6             | 0           | -2.044889               | 0.077738  | -1.799270 |
| 8             | 6             | 0           | -1.985596               | -0.743969 | 0.445342  |
| 9             | 6             | 0           | -3.052220               | -0.838074 | -2.110371 |
| 10            | 6             | 0           | -2.960187               | -1.693957 | 0.140366  |
| 11            | 6             | 0           | -3.508504               | -1.730515 | -1.140503 |
| 12            | 1             | 0           | -3.462036               | -0.862401 | -3.114597 |
| 13            | 1             | 0           | -3.289890               | -2.379208 | 0.911880  |
| 14            | 1             | 0           | -4.280969               | -2.455043 | -1.374523 |
| 15            | 1             | 0           | -1.096496               | 2.407050  | 1.398667  |
| 16            | 1             | 0           | 0.016927                | 1.443356  | -1.294551 |
| 17            | 16            | 0           | 2.197835                | 0.440504  | -0.123687 |
| 18            | 8             | 0           | 2.278748                | 1.025601  | -1.455479 |
| 19            | 8             | 0           | 3.135132                | 0.752859  | 0.938231  |
| 20            | 6             | 0           | 2.209985                | -1.436766 | -0.334150 |
| 21            | 9             | 0           | 3.400288                | -1.794589 | -0.817675 |
| 22            | 9             | 0           | 2.003130                | -2.028242 | 0.840198  |
| 23            | 9             | 0           | 1.251248                | -1.794095 | -1.193221 |
| 24            | 1             | 0           | -1.670688               | 0.739582  | -2.573946 |
| 25            | 7             | 0           | -1.517650               | -0.738237 | 1.842223  |
| 26            | 8             | 0           | -1.380601               | -1.824726 | 2.403220  |
| 27            | 8             | 0           | -1.327078               | 0.351621  | 2.385371  |

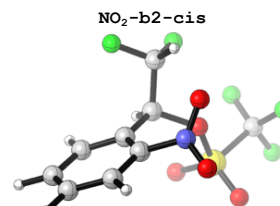

Standard orientation:

| Center Number | Atomic Number | Atomic Type | Coordinates (Angstroms) |           |           |
|---------------|---------------|-------------|-------------------------|-----------|-----------|
|               |               |             | X                       | Y         | Z         |
| 1             | 6             | 0           | -0.284623               | 2.054418  | 0.914345  |
| 2             | 9             | 0           | 0.973649                | 2.602263  | 0.882321  |
| 3             | 9             | 0           | -1.166252               | 3.043246  | 0.549341  |
| 4             | 8             | 0           | 0.563322                | -0.093963 | 0.292478  |
| 5             | 6             | 0           | -0.360602               | 0.947290  | -0.149582 |
| 6             | 6             | 0           | -1.744034               | 0.387488  | -0.423193 |
| 7             | 6             | 0           | -2.390725               | 0.846344  | -1.577742 |
| 8             | 6             | 0           | -2.414507               | -0.593866 | 0.331095  |
| 9             | 6             | 0           | -3.651086               | 0.375869  | -1.952140 |
| 10            | 6             | 0           | -3.654746               | -1.105105 | -0.051057 |
| 11            | 6             | 0           | -4.283937               | -0.605970 | -1.190154 |
| 12            | 1             | 0           | -4.123531               | 0.764751  | -2.848008 |
| 13            | 1             | 0           | -4.119499               | -1.872926 | 0.555552  |
| 14            | 1             | 0           | -5.256822               | -0.989105 | -1.478579 |
| 15            | 1             | 0           | -0.505071               | 1.733620  | 1.929286  |
| 16            | 1             | 0           | 0.020586                | 1.382288  | -1.076705 |
| 17            | 16            | 0           | 1.575455                | -0.803921 | -0.770827 |
| 18            | 8             | 0           | 1.492100                | -2.238521 | -0.564751 |
| 19            | 8             | 0           | 1.449482                | -0.187072 | -2.085440 |
| 20            | 6             | 0           | 3.221133                | -0.244068 | -0.025186 |
| 21            | 9             | 0           | 4.197944                | -0.880690 | -0.675471 |
| 22            | 9             | 0           | 3.364291                | 1.070740  | -0.178938 |
| 23            | 9             | 0           | 3.263254                | -0.557844 | 1.268085  |
| 24            | 7             | 0           | -1.862817               | -1.135484 | 1.584937  |
| 25            | 8             | 0           | -2.025057               | -2.333802 | 1.809577  |
| 26            | 8             | 0           | -1.306174               | -0.354248 | 2.359714  |
| 27            | 1             | 0           | -1.889835               | 1.579498  | -2.201851 |

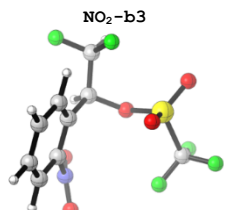

Standard orientation:

| Center Number | Atomic Number | Atomic Type | Coordinates (Angstroms) |           |           |
|---------------|---------------|-------------|-------------------------|-----------|-----------|
|               |               |             | X                       | Y         | Z         |
| 1             | 6             | 0           | 0.730870                | 2.430824  | 1.052029  |
| 2             | 9             | 0           | 2.002380                | 2.807715  | 1.401139  |
| 3             | 9             | 0           | 0.442283                | 3.015021  | -0.159337 |
| 4             | 8             | 0           | -0.750517               | 0.511599  | 0.834216  |
| 5             | 6             | 0           | 0.662989                | 0.902739  | 0.995402  |
| 6             | 6             | 0           | 1.609780                | 0.163195  | 0.066464  |
| 7             | 6             | 0           | 1.797007                | -1.235362 | 0.148933  |
| 8             | 6             | 0           | 2.341080                | 0.834529  | -0.921192 |
| 9             | 6             | 0           | 2.651752                | -1.924630 | -0.711140 |
| 10            | 6             | 0           | 3.223157                | 0.159629  | -1.768496 |
| 11            | 1             | 0           | 2.218506                | 1.901349  | -1.046390 |
| 12            | 6             | 0           | 3.379751                | -1.221348 | -1.668126 |
| 13            | 1             | 0           | 2.748038                | -2.998402 | -0.610933 |
| 14            | 1             | 0           | 3.776532                | 0.721116  | -2.513927 |
| 15            | 1             | 0           | 4.058464                | -1.752216 | -2.326891 |
| 16            | 8             | 0           | 0.854899                | -3.235789 | 0.847938  |
| 17            | 1             | 0           | 0.839103                | 0.568236  | 2.016943  |
| 18            | 16            | 0           | -1.647248               | 0.732198  | -0.511138 |
| 19            | 8             | 0           | -2.522386               | 1.881667  | -0.338410 |
| 20            | 8             | 0           | -0.869063               | 0.537211  | -1.725864 |
| 21            | 7             | 0           | 1.111703                | -2.072053 | 1.154753  |
| 22            | 8             | 0           | 0.856272                | -1.583947 | 2.259851  |
| 23            | 6             | 0           | -2.702816               | -0.812956 | -0.238556 |
| 24            | 9             | 0           | -3.325021               | -0.746116 | 0.936948  |
| 25            | 9             | 0           | -3.605205               | -0.856304 | -1.222101 |
| 26            | 9             | 0           | -1.938126               | -1.903309 | -0.286294 |
| 27            | 1             | 0           | 0.031549                | 2.830404  | 1.789180  |

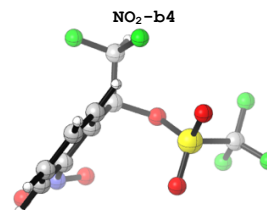

Standard orientation:

| Center Number | Atomic Number | Atomic Type | Coordinates (Angstroms) |           |           |
|---------------|---------------|-------------|-------------------------|-----------|-----------|
|               |               |             | X                       | Y         | Z         |
| 1             | 6             | 0           | -0.288870               | 2.143982  | -1.405351 |
| 2             | 9             | 0           | -1.519813               | 2.636908  | -1.763174 |
| 3             | 9             | 0           | 0.192502                | 2.930938  | -0.391377 |
| 4             | 8             | 0           | 0.901091                | 0.160252  | -0.756407 |
| 5             | 6             | 0           | -0.460201               | 0.671145  | -1.005544 |
| 6             | 6             | 0           | -1.486764               | 0.357105  | 0.066451  |
| 7             | 6             | 0           | -2.344135               | -0.765135 | -0.002970 |
| 8             | 6             | 0           | -1.669569               | 1.220134  | 1.156480  |
| 9             | 6             | 0           | -3.327410               | -1.009319 | 0.955135  |
| 10            | 6             | 0           | -2.637862               | 0.974347  | 2.132455  |
| 11            | 1             | 0           | -1.044989               | 2.098150  | 1.249131  |
| 12            | 6             | 0           | -3.468458               | -0.140520 | 2.034969  |
| 13            | 1             | 0           | -3.958780               | -1.882594 | 0.851459  |
| 14            | 1             | 0           | -2.737837               | 1.661207  | 2.966275  |
| 15            | 1             | 0           | -4.220949               | -0.338656 | 2.790583  |
| 16            | 8             | 0           | -3.271717               | -2.384041 | -1.380353 |
| 17            | 1             | 0           | -0.723417               | 0.156420  | -1.927462 |
| 18            | 16            | 0           | 1.516647                | -0.188841 | 0.704316  |
| 19            | 8             | 0           | 1.654184                | 0.999118  | 1.536561  |
| 20            | 8             | 0           | 0.943181                | -1.414646 | 1.242368  |
| 21            | 7             | 0           | -2.250127               | -1.763049 | -1.083448 |
| 22            | 8             | 0           | -1.155487               | -1.941307 | -1.626363 |
| 23            | 6             | 0           | 3.223144                | -0.607836 | 0.005485  |
| 24            | 9             | 0           | 3.989452                | -0.969590 | 1.038285  |
| 25            | 9             | 0           | 3.137322                | -1.614219 | -0.861789 |
| 26            | 9             | 0           | 3.752991                | 0.460739  | -0.589595 |
| 27            | 1             | 0           | 0.389172                | 2.246858  | -2.255177 |

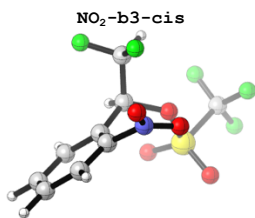

Standard orientation:

| Center Number | Atomic Number | Atomic Type | Coordinates (Angstroms) |           |           |
|---------------|---------------|-------------|-------------------------|-----------|-----------|
|               |               |             | X                       | Y         | Z         |
| 1             | 6             | 0           | -0.416838               | -1.501001 | 1.579203  |
| 2             | 9             | 0           | -1.161985               | -1.320557 | 2.718643  |
| 3             | 9             | 0           | -1.096597               | -2.391014 | 0.794939  |
| 4             | 8             | 0           | 0.763435                | -0.327684 | -0.124896 |
| 5             | 6             | 0           | -0.256505               | -0.130183 | 0.905555  |
| 6             | 6             | 0           | -1.531395               | 0.532287  | 0.415141  |
| 7             | 6             | 0           | -1.886812               | 1.715918  | 1.079867  |
| 8             | 6             | 0           | -2.445854               | 0.056597  | -0.549835 |
| 9             | 6             | 0           | -3.070686               | 2.401329  | 0.801555  |
| 10            | 6             | 0           | -3.641979               | 0.718867  | -0.823420 |
| 11            | 6             | 0           | -3.952967               | 1.901455  | -0.153975 |
| 12            | 1             | 0           | -3.297191               | 3.318450  | 1.334949  |
| 13            | 1             | 0           | -4.312135               | 0.307412  | -1.568462 |
| 14            | 1             | 0           | -4.876826               | 2.421763  | -0.382831 |
| 15            | 1             | 0           | 0.171897                | 0.515739  | 1.674697  |
| 16            | 16            | 0           | 1.826671                | 0.858352  | -0.445331 |
| 17            | 8             | 0           | 1.815803                | 1.122849  | -1.872329 |
| 18            | 8             | 0           | 1.720869                | 1.920366  | 0.549456  |
| 19            | 6             | 0           | 3.406320                | -0.109225 | -0.077078 |
| 20            | 9             | 0           | 3.458156                | -1.206536 | -0.829290 |
| 21            | 9             | 0           | 4.447107                | 0.677946  | -0.354513 |
| 22            | 9             | 0           | 3.433551                | -0.446777 | 1.215127  |
| 23            | 1             | 0           | 0.543927                | -1.943282 | 1.850074  |
| 24            | 7             | 0           | -2.208978               | -1.143781 | -1.375334 |
| 25            | 8             | 0           | -3.156025               | -1.898529 | -1.541275 |
| 26            | 8             | 0           | -1.108789               | -1.290683 | -1.881043 |
| 27            | 1             | 0           | -1.217700               | 2.108366  | 1.838667  |

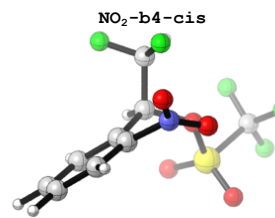

Standard orientation:

| Center Number | Atomic Number | Atomic Type | Coordinates (Angstroms) |           |           |
|---------------|---------------|-------------|-------------------------|-----------|-----------|
|               |               |             | X                       | Y         | Z         |
| 1             | 6             | 0           | -0.397017               | -1.367244 | 1.657924  |
| 2             | 9             | 0           | -1.157892               | -1.142568 | 2.778850  |
| 3             | 9             | 0           | -1.041444               | -2.322821 | 0.921533  |
| 4             | 8             | 0           | 0.752660                | -0.261385 | -0.114068 |
| 5             | 6             | 0           | -0.272312               | -0.035090 | 0.904645  |
| 6             | 6             | 0           | -1.564409               | 0.559125  | 0.373391  |
| 7             | 6             | 0           | -1.963675               | 1.764471  | 0.971256  |
| 8             | 6             | 0           | -2.456876               | 0.000485  | -0.566806 |
| 9             | 6             | 0           | -3.168577               | 2.392697  | 0.651106  |
| 10            | 6             | 0           | -3.673400               | 0.604917  | -0.880441 |
| 11            | 6             | 0           | -4.028159               | 1.811293  | -0.278365 |
| 12            | 1             | 0           | -3.429361               | 3.329134  | 1.132745  |
| 13            | 1             | 0           | -4.325503               | 0.129771  | -1.603360 |
| 14            | 1             | 0           | -4.968308               | 2.285903  | -0.538170 |
| 15            | 1             | 0           | 0.137270                | 0.667281  | 1.633581  |
| 16            | 16            | 0           | 1.854525                | 0.892350  | -0.422503 |
| 17            | 8             | 0           | 1.830749                | 1.201951  | -1.840538 |
| 18            | 8             | 0           | 1.808296                | 1.928301  | 0.603893  |
| 19            | 6             | 0           | 3.397499                | -0.151765 | -0.110934 |
| 20            | 9             | 0           | 4.465871                | 0.615107  | -0.335176 |
| 21            | 9             | 0           | 3.407106                | -0.571032 | 1.157379  |
| 22            | 9             | 0           | 3.414283                | -1.199580 | -0.931486 |
| 23            | 1             | 0           | 0.573951                | -1.763501 | 1.961939  |
| 24            | 7             | 0           | -2.174607               | -1.237320 | -1.322154 |
| 25            | 8             | 0           | -3.098553               | -2.044401 | -1.440371 |
| 26            | 8             | 0           | -1.062366               | -1.370766 | -1.825669 |
| 27            | 1             | 0           | -1.314255               | 2.220166  | 1.711863  |

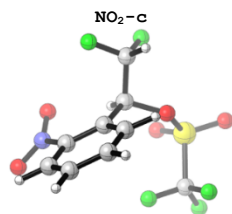

Standard orientation:

| Center Number | Atomic Number | Atomic Type | Coordinates (Angstroms) |           |           |
|---------------|---------------|-------------|-------------------------|-----------|-----------|
|               |               |             | X                       | Y         | Z         |
| 1             | 6             | 0           | 0.622449                | 2.394004  | -0.880298 |
| 2             | 9             | 0           | -0.242098               | 3.343952  | -0.400905 |
| 3             | 9             | 0           | 1.889976                | 2.780475  | -0.539795 |
| 4             | 8             | 0           | -1.004920               | 0.681056  | -0.790101 |
| 5             | 6             | 0           | 0.299994                | 1.043832  | -0.219187 |
| 6             | 6             | 0           | 1.300717                | -0.038916 | -0.571343 |
| 7             | 6             | 0           | 2.240778                | -0.592990 | 0.320373  |
| 8             | 6             | 0           | 1.279390                | -0.556181 | -1.874244 |
| 9             | 6             | 0           | 3.111987                | -1.614235 | -0.066703 |
| 10            | 6             | 0           | 2.157188                | -1.562347 | -2.278288 |
| 11            | 1             | 0           | 0.547182                | -0.177744 | -2.579225 |
| 12            | 6             | 0           | 3.078296                | -2.092664 | -1.373223 |
| 13            | 1             | 0           | 3.811182                | -2.011714 | 0.657950  |
| 14            | 1             | 0           | 2.116139                | -1.930970 | -3.297911 |
| 15            | 1             | 0           | 3.765845                | -2.874169 | -1.677999 |
| 16            | 8             | 0           | 2.011210                | 1.012661  | 1.994882  |
| 17            | 1             | 0           | 0.540919                | 2.375443  | -1.969941 |
| 18            | 1             | 0           | 0.196367                | 1.199601  | 0.851807  |
| 19            | 16            | 0           | -2.299475               | 0.439062  | 0.164038  |
| 20            | 8             | 0           | -2.027606               | 0.876638  | 1.525282  |
| 21            | 8             | 0           | -3.459969               | 0.868581  | -0.593871 |
| 22            | 7             | 0           | 2.365183                | -0.136598 | 1.715870  |
| 23            | 8             | 0           | 2.831759                | -0.927671 | 2.536753  |
| 24            | 6             | 0           | -2.323821               | -1.450006 | 0.178022  |
| 25            | 9             | 0           | -3.347542               | -1.851423 | 0.931769  |
| 26            | 9             | 0           | -2.470661               | -1.911473 | -1.063708 |
| 27            | 9             | 0           | -1.179451               | -1.908459 | 0.693241  |

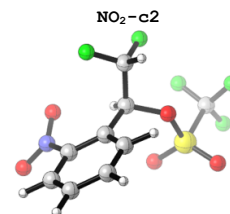

Standard orientation:

| Center Number | Atomic Number | Atomic Type | Coordinates (Angstroms) |           |           |
|---------------|---------------|-------------|-------------------------|-----------|-----------|
|               |               |             | X                       | Y         | Z         |
| 1             | 6             | 0           | 0.215464                | 1.695220  | -1.505438 |
| 2             | 9             | 0           | -0.908583               | 2.454224  | -1.305157 |
| 3             | 9             | 0           | 1.298815                | 2.515234  | -1.353952 |
| 4             | 8             | 0           | -0.856457               | -0.286210 | -0.855667 |
| 5             | 6             | 0           | 0.262990                | 0.575980  | -0.451468 |
| 6             | 6             | 0           | 1.557974                | -0.213798 | -0.493237 |
| 7             | 6             | 0           | 2.591794                | -0.124468 | 0.461026  |
| 8             | 6             | 0           | 1.743053                | -1.117648 | -1.548347 |
| 9             | 6             | 0           | 3.748781                | -0.901968 | 0.368849  |
| 10            | 6             | 0           | 2.902789                | -1.884977 | -1.661355 |
| 11            | 1             | 0           | 0.953662                | -1.237614 | -2.282381 |
| 12            | 6             | 0           | 3.910591                | -1.776361 | -0.701668 |
| 13            | 1             | 0           | 4.509806                | -0.804315 | 1.132458  |
| 14            | 1             | 0           | 3.012668                | -2.568597 | -2.496714 |
| 15            | 1             | 0           | 4.815484                | -2.369084 | -0.780511 |
| 16            | 8             | 0           | 1.786625                | 1.776289  | 1.545137  |
| 17            | 1             | 0           | 0.198911                | 1.321037  | -2.532041 |
| 18            | 1             | 0           | 0.064396                | 1.004598  | 0.526946  |
| 19            | 16            | 0           | -1.702034               | -1.108851 | 0.262777  |
| 20            | 8             | 0           | -2.097557               | -2.363176 | -0.351706 |
| 21            | 8             | 0           | -1.045920               | -1.030007 | 1.560234  |
| 22            | 7             | 0           | 2.516949                | 0.783240  | 1.618958  |
| 23            | 8             | 0           | 3.201719                | 0.511032  | 2.605770  |
| 24            | 6             | 0           | -3.248639               | -0.025366 | 0.342260  |
| 25            | 9             | 0           | -4.111844               | -0.595254 | 1.184778  |
| 26            | 9             | 0           | -2.920648               | 1.188268  | 0.786798  |
| 27            | 9             | 0           | -3.797418               | 0.069728  | -0.867885 |

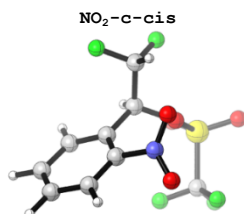

Standard orientation:

| Center Number | Atomic Number | Atomic Type | Coordinates (Angstroms) |           |           |
|---------------|---------------|-------------|-------------------------|-----------|-----------|
|               |               |             | X                       | Y         | Z         |
| 1             | 6             | 0           | -0.789373               | 2.494960  | 0.359689  |
| 2             | 9             | 0           | 0.272284                | 3.362023  | 0.280899  |
| 3             | 9             | 0           | -1.814879               | 3.040605  | -0.374800 |
| 4             | 8             | 0           | 0.700306                | 0.618900  | 0.492916  |
| 5             | 6             | 0           | -0.382888               | 1.173906  | -0.314371 |
| 6             | 6             | 0           | -1.493408               | 0.161091  | -0.513804 |
| 7             | 6             | 0           | -2.044119               | 0.077306  | -1.799179 |
| 8             | 6             | 0           | -1.984584               | -0.744281 | 0.445482  |
| 9             | 6             | 0           | -3.051053               | -0.838929 | -2.110293 |
| 10            | 6             | 0           | -2.958795               | -1.694667 | 0.140473  |
| 11            | 6             | 0           | -3.507051               | -1.731492 | -1.140406 |
| 12            | 1             | 0           | -3.460816               | -0.863437 | -3.114536 |
| 13            | 1             | 0           | -3.288247               | -2.380037 | 0.911986  |
| 14            | 1             | 0           | -4.279253               | -2.456309 | -1.374407 |
| 15            | 1             | 0           | -1.097809               | 2.407090  | 1.398426  |
| 16            | 1             | 0           | 0.016904                | 1.444077  | -1.294538 |
| 17            | 16            | 0           | 2.197866                | 0.440654  | -0.123935 |
| 18            | 8             | 0           | 2.278932                | 1.025463  | -1.455836 |
| 19            | 8             | 0           | 3.135625                | 0.752356  | 0.937759  |
| 20            | 6             | 0           | 2.208862                | -1.436665 | -0.334111 |
| 21            | 9             | 0           | 3.399020                | -1.795184 | -0.817494 |
| 22            | 9             | 0           | 2.001652                | -2.027774 | 0.840359  |
| 23            | 9             | 0           | 1.250026                | -1.793697 | -1.193168 |
| 24            | 1             | 0           | -1.670188               | 0.739240  | -2.573907 |
| 25            | 7             | 0           | -1.516754               | -0.738408 | 1.842397  |
| 26            | 8             | 0           | -1.379720               | -1.824864 | 2.403467  |
| 27            | 8             | 0           | -1.326098               | 0.351474  | 2.385461  |

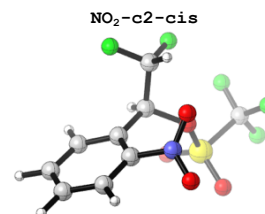

Standard orientation:

| Center Number | Atomic Number | Atomic Type | Coordinates (Angstroms) |           |           |
|---------------|---------------|-------------|-------------------------|-----------|-----------|
|               |               |             | X                       | Y         | Z         |
| 1             | 6             | 0           | -0.285029               | 2.057465  | 0.911056  |
| 2             | 9             | 0           | 0.973283                | 2.605409  | 0.879092  |
| 3             | 9             | 0           | -1.166316               | 3.045113  | 0.542155  |
| 4             | 8             | 0           | 0.564469                | -0.092117 | 0.296586  |
| 5             | 6             | 0           | -0.359352               | 0.947415  | -0.149905 |
| 6             | 6             | 0           | -1.742312               | 0.386833  | -0.424332 |
| 7             | 6             | 0           | -2.386953               | 0.842429  | -1.581291 |
| 8             | 6             | 0           | -2.414136               | -0.592444 | 0.331466  |
| 9             | 6             | 0           | -3.646657               | 0.370892  | -1.956628 |
| 10            | 6             | 0           | -3.653670               | -1.104766 | -0.051436 |
| 11            | 6             | 0           | -4.280858               | -0.608810 | -1.193047 |
| 12            | 1             | 0           | -4.117435               | 0.757276  | -2.854455 |
| 13            | 1             | 0           | -4.119509               | -1.870879 | 0.556505  |
| 14            | 1             | 0           | -5.253231               | -0.992770 | -1.482098 |
| 15            | 1             | 0           | -0.506678               | 1.739510  | 1.926626  |
| 16            | 1             | 0           | 0.023070                | 1.380170  | -1.077566 |
| 17            | 16            | 0           | 1.573771                | -0.808878 | -0.764939 |
| 18            | 8             | 0           | 1.491706                | -2.242055 | -0.548800 |
| 19            | 8             | 0           | 1.443537                | -0.201054 | -2.083329 |
| 20            | 6             | 0           | 3.221331                | -0.243032 | -0.027966 |
| 21            | 9             | 0           | 4.196783                | -0.881911 | -0.678056 |
| 22            | 9             | 0           | 3.362228                | 1.071155  | -0.189349 |
| 23            | 9             | 0           | 3.268200                | -0.549707 | 1.266828  |
| 24            | 7             | 0           | -1.864527               | -1.130325 | 1.587721  |
| 25            | 8             | 0           | -2.026493               | -2.328088 | 1.815413  |
| 26            | 8             | 0           | -1.309681               | -0.346582 | 2.361264  |
| 27            | 1             | 0           | -1.884960               | 1.573769  | -2.206634 |

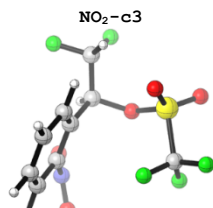

Standard orientation:

| Center Number | Atomic Number | Atomic Type | Coordinates (Angstroms) |           |           |
|---------------|---------------|-------------|-------------------------|-----------|-----------|
|               |               |             | X                       | Y         | Z         |
| 1             | 6             | 0           | -0.082433               | 2.686230  | 0.101875  |
| 2             | 9             | 0           | 0.718719                | 3.362203  | -0.781070 |
| 3             | 9             | 0           | -1.275918               | 3.362593  | 0.177836  |
| 4             | 8             | 0           | 0.866200                | 0.614560  | -0.879143 |
| 5             | 6             | 0           | -0.387008               | 1.302320  | -0.487300 |
| 6             | 6             | 0           | -1.311397               | 0.422440  | 0.328394  |
| 7             | 6             | 0           | -2.068538               | -0.619860 | -0.250060 |
| 8             | 6             | 0           | -1.423321               | 0.581290  | 1.715501  |
| 9             | 6             | 0           | -2.885533               | -1.456689 | 0.508000  |
| 10            | 6             | 0           | -2.259921               | -0.230781 | 2.484800  |
| 11            | 1             | 0           | -0.844714               | 1.345282  | 2.219021  |
| 12            | 6             | 0           | -2.993414               | -1.251294 | 1.882500  |
| 13            | 1             | 0           | -3.436988               | -2.247729 | 0.015021  |
| 14            | 1             | 0           | -2.326801               | -0.064895 | 3.554764  |
| 15            | 1             | 0           | -3.643608               | -1.888241 | 2.472354  |
| 16            | 8             | 0           | -2.120140               | -2.085890 | -2.042074 |
| 17            | 1             | 0           | -0.819012               | 1.487199  | -1.468939 |
| 18            | 16            | 0           | 2.074939                | 0.234156  | 0.134143  |
| 19            | 8             | 0           | 3.319014                | 0.518350  | -0.557695 |
| 20            | 8             | 0           | 1.801109                | 0.719877  | 1.482292  |
| 21            | 7             | 0           | -2.047774               | -0.906411 | -1.699639 |
| 22            | 8             | 0           | -1.989855               | 0.038489  | -2.491418 |
| 23            | 6             | 0           | 1.909924                | -1.650632 | 0.156457  |
| 24            | 9             | 0           | 1.946573                | -2.122908 | -1.087653 |
| 25            | 9             | 0           | 2.936134                | -2.138868 | 0.855879  |
| 26            | 9             | 0           | 0.764109                | -2.006115 | 0.739910  |
| 27            | 1             | 0           | 0.399204                | 2.713409  | 1.078156  |

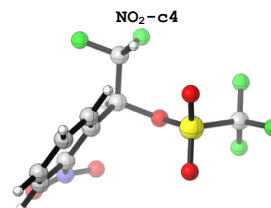

Standard orientation:

| Center Number | Atomic Number | Atomic Type | Coordinates (Angstroms) |           |           |
|---------------|---------------|-------------|-------------------------|-----------|-----------|
|               |               |             | X                       | Y         | Z         |
| 1             | 6             | 0           | -0.034811               | 2.316001  | -0.253481 |
| 2             | 9             | 0           | 0.894845                | 2.725251  | -1.173968 |
| 3             | 9             | 0           | -1.153672               | 3.095757  | -0.426180 |
| 4             | 8             | 0           | 0.776913                | 0.028196  | -0.625596 |
| 5             | 6             | 0           | -0.432420               | 0.868764  | -0.582414 |
| 6             | 6             | 0           | -1.542169               | 0.296965  | 0.279485  |
| 7             | 6             | 0           | -2.544548               | -0.564302 | -0.219410 |
| 8             | 6             | 0           | -1.641417               | 0.657669  | 1.630375  |
| 9             | 6             | 0           | -3.584706               | -1.035392 | 0.581282  |
| 10            | 6             | 0           | -2.666040               | 0.177149  | 2.448238  |
| 11            | 1             | 0           | -0.903903               | 1.320657  | 2.065959  |
| 12            | 6             | 0           | -3.639484               | -0.672514 | 1.925092  |
| 13            | 1             | 0           | -4.330556               | -1.688587 | 0.146332  |
| 14            | 1             | 0           | -2.697924               | 0.472378  | 3.491611  |
| 15            | 1             | 0           | -4.438239               | -1.051953 | 2.553028  |
| 16            | 8             | 0           | -3.646402               | -1.314053 | -2.116683 |
| 17            | 1             | 0           | -0.717569               | 0.868387  | -1.632698 |
| 18            | 16            | 0           | 1.553941                | -0.485523 | 0.700419  |
| 19            | 8             | 0           | 1.660130                | 0.584269  | 1.689948  |
| 20            | 8             | 0           | 1.114469                | -1.818956 | 1.081974  |
| 21            | 7             | 0           | -2.557086               | -1.025531 | -1.619741 |
| 22            | 8             | 0           | -1.481322               | -1.114876 | -2.217181 |
| 23            | 6             | 0           | 3.229117                | -0.660882 | -0.159442 |
| 24            | 9             | 0           | 4.094872                | -1.111020 | 0.752624  |
| 25            | 9             | 0           | 3.140631                | -1.531157 | -1.162431 |
| 26            | 9             | 0           | 3.634407                | 0.522144  | -0.615952 |
| 27            | 1             | 0           | 0.373555                | 2.500029  | 0.739113  |

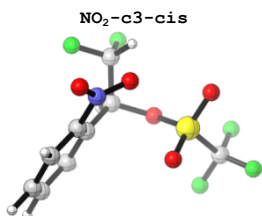

Standard orientation:

| Center Number | Atomic Number | Atomic Type | Coordinates (Angstroms) |           |           |
|---------------|---------------|-------------|-------------------------|-----------|-----------|
|               |               |             | X                       | Y         | Z         |
| 1             | 6             | 0           | -0.699096               | 2.233791  | -0.699493 |
| 2             | 9             | 0           | -0.045883               | 3.027616  | -1.614626 |
| 3             | 9             | 0           | -2.044684               | 2.469865  | -0.852075 |
| 4             | 8             | 0           | 0.982040                | 0.466146  | -0.726773 |
| 5             | 6             | 0           | -0.414916               | 0.768971  | -1.077706 |
| 6             | 6             | 0           | -1.423405               | -0.326140 | -0.755993 |
| 7             | 6             | 0           | -1.607429               | -1.263567 | -1.782500 |
| 8             | 6             | 0           | -2.227893               | -0.494533 | 0.391203  |
| 9             | 6             | 0           | -2.514790               | -2.319846 | -1.677249 |
| 10            | 6             | 0           | -3.158382               | -1.527985 | 0.500950  |
| 11            | 6             | 0           | -3.297350               | -2.452137 | -0.531957 |
| 12            | 1             | 0           | -2.611951               | -3.025571 | -2.495508 |
| 13            | 1             | 0           | -3.751074               | -1.604510 | 1.403575  |
| 14            | 1             | 0           | -4.010885               | -3.263353 | -0.436868 |
| 15            | 1             | 0           | -0.331603               | 0.784533  | -2.166042 |
| 16            | 16            | 0           | 1.576440                | -0.081565 | 0.684282  |
| 17            | 8             | 0           | 1.927013                | 1.015052  | 1.573666  |
| 18            | 8             | 0           | 0.867581                | -1.262750 | 1.156586  |
| 19            | 6             | 0           | 3.184472                | -0.675884 | -0.111527 |
| 20            | 9             | 0           | 3.830033                | 0.342271  | -0.679526 |
| 21            | 9             | 0           | 3.937557                | -1.193323 | 0.863806  |
| 22            | 9             | 0           | 2.933146                | -1.616394 | -1.023457 |
| 23            | 1             | 0           | -0.391250               | 2.544516  | 0.294395  |
| 24            | 7             | 0           | -2.118075               | 0.386125  | 1.559239  |
| 25            | 8             | 0           | -3.071516               | 0.458453  | 2.332162  |
| 26            | 8             | 0           | -1.056723               | 0.998296  | 1.720488  |
| 27            | 1             | 0           | -1.025696               | -1.161335 | -2.693231 |

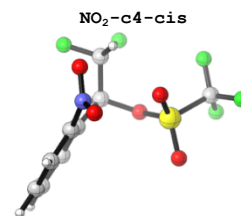

Standard orientation:

| Center Number | Atomic Number | Atomic Type | Coordinates (Angstroms) |           |           |
|---------------|---------------|-------------|-------------------------|-----------|-----------|
|               |               |             | X                       | Y         | Z         |
| 1             | 6             | 0           | -0.020662               | 2.185922  | -0.060294 |
| 2             | 9             | 0           | 1.081316                | 2.780002  | -0.636280 |
| 3             | 9             | 0           | -1.057296               | 3.075174  | -0.177264 |
| 4             | 8             | 0           | 0.807926                | 0.081468  | -1.051624 |
| 5             | 6             | 0           | -0.373367               | 0.967393  | -0.925743 |
| 6             | 6             | 0           | -1.666939               | 0.178860  | -0.755202 |
| 7             | 6             | 0           | -2.230184               | -0.231851 | -1.976181 |
| 8             | 6             | 0           | -2.309852               | -0.296564 | 0.410632  |
| 9             | 6             | 0           | -3.354741               | -1.052948 | -2.051588 |
| 10            | 6             | 0           | -3.422175               | -1.138539 | 0.349769  |
| 11            | 6             | 0           | -3.953124               | -1.514451 | -0.881368 |
| 12            | 1             | 0           | -3.751880               | -1.330693 | -3.022146 |
| 13            | 1             | 0           | -3.872149               | -1.476015 | 1.275172  |
| 14            | 1             | 0           | -4.827179               | -2.155633 | -0.917889 |
| 15            | 1             | 0           | -0.397658               | 1.372945  | -1.938561 |
| 16            | 16            | 0           | 1.333787                | -0.912065 | 0.117079  |
| 17            | 8             | 0           | 0.890003                | -0.444192 | 1.425196  |
| 18            | 8             | 0           | 1.162708                | -2.292586 | -0.304635 |
| 19            | 6             | 0           | 3.170985                | -0.502232 | -0.062702 |
| 20            | 9             | 0           | 3.845139                | -1.301957 | 0.766279  |
| 21            | 9             | 0           | 3.565959                | -0.719413 | -1.316342 |
| 22            | 9             | 0           | 3.385450                | 0.769811  | 0.266974  |
| 23            | 1             | 0           | 0.196176                | 2.010645  | 0.988072  |
| 24            | 7             | 0           | -1.921761               | 0.080804  | 1.783866  |
| 25            | 8             | 0           | -2.010745               | -0.779513 | 2.656917  |
| 26            | 8             | 0           | -1.587401               | 1.247936  | 1.991526  |
| 27            | 1             | 0           | -1.760267               | 0.095161  | -2.898250 |

## 5.4.2. Optimized Coordinates of Conformers of 1-(4-Bromophenyl)-2,2-difluoroethanol Triflate (4-Br)

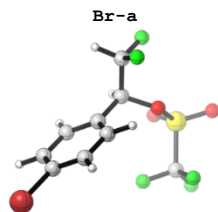

Standard orientation:

| Center Number | Atomic Number | Atomic Type | Coordinates (Angstroms) |           |           |
|---------------|---------------|-------------|-------------------------|-----------|-----------|
|               |               |             | X                       | Y         | Z         |
| 1             | 6             | 0           | -1.278356               | 2.825465  | 0.078393  |
| 2             | 9             | 0           | -1.042093               | 3.045658  | -1.254780 |
| 3             | 9             | 0           | -2.587114               | 3.166138  | 0.314617  |
| 4             | 8             | 0           | -1.944838               | 0.587223  | -0.433897 |
| 5             | 6             | 0           | -1.053833               | 1.357281  | 0.446620  |
| 6             | 6             | 0           | 0.374281                | 0.896743  | 0.295473  |
| 7             | 6             | 0           | 1.133767                | 0.651084  | 1.445228  |
| 8             | 6             | 0           | 0.957762                | 0.724567  | -0.967815 |
| 9             | 6             | 0           | 2.464538                | 0.241353  | 1.344796  |
| 10            | 6             | 0           | 2.283155                | 0.308204  | -1.080922 |
| 11            | 1             | 0           | 0.378879                | 0.905903  | -1.866828 |
| 12            | 6             | 0           | 3.022698                | 0.071913  | 0.079398  |
| 13            | 1             | 0           | 3.048078                | 0.048252  | 2.237529  |
| 14            | 1             | 0           | 2.731367                | 0.169447  | -2.058065 |
| 15            | 1             | 0           | -0.635038               | 3.490701  | 0.659681  |
| 16            | 1             | 0           | -1.388912               | 1.236443  | 1.479396  |
| 17            | 16            | 0           | -3.032886               | -0.445894 | 0.175606  |
| 18            | 8             | 0           | -3.108297               | -0.320506 | 1.625996  |
| 19            | 8             | 0           | -4.202489               | -0.394747 | -0.682613 |
| 20            | 6             | 0           | -2.166000               | -2.082837 | -0.196035 |
| 21            | 9             | 0           | -2.965212               | -3.075614 | 0.200726  |
| 22            | 9             | 0           | -1.934461               | -2.189039 | -1.504195 |
| 23            | 9             | 0           | -1.011464               | -2.145949 | 0.470879  |
| 24            | 1             | 0           | 0.689655                | 0.770607  | 2.429473  |
| 25            | 35            | 0           | 4.833776                | -0.503891 | -0.070937 |

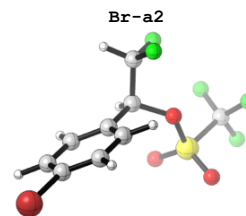

Standard orientation:

| Center Number | Atomic Number | Atomic Type | Coordinates (Angstroms) |           |           |
|---------------|---------------|-------------|-------------------------|-----------|-----------|
|               |               |             | X                       | Y         | Z         |
| 1             | 6             | 0           | -1.014708               | 2.428799  | 0.230295  |
| 2             | 9             | 0           | -0.788086               | 2.754698  | -1.082516 |
| 3             | 9             | 0           | -2.337229               | 2.695179  | 0.486009  |
| 4             | 8             | 0           | -1.578358               | 0.214410  | -0.447302 |
| 5             | 6             | 0           | -0.723057               | 0.949733  | 0.493117  |
| 6             | 6             | 0           | 0.729114                | 0.575753  | 0.318363  |
| 7             | 6             | 0           | 1.512697                | 0.338489  | 1.453586  |
| 8             | 6             | 0           | 1.309070                | 0.479608  | -0.954225 |
| 9             | 6             | 0           | 2.865192                | 0.015496  | 1.329563  |
| 10            | 6             | 0           | 2.656569                | 0.150019  | -1.091110 |
| 11            | 1             | 0           | 0.710035                | 0.651313  | -1.841776 |
| 12            | 6             | 0           | 3.420632                | -0.076478 | 0.054978  |
| 13            | 1             | 0           | 3.467513                | -0.172076 | 2.210832  |
| 14            | 1             | 0           | 3.102200                | 0.069096  | -2.075846 |
| 15            | 1             | 0           | -0.401571               | 3.077149  | 0.861255  |
| 16            | 1             | 0           | -1.049214               | 0.735538  | 1.513677  |
| 17            | 16            | 0           | -2.272456               | -1.179740 | 0.000816  |
| 18            | 8             | 0           | -2.070627               | -2.143600 | -1.066728 |
| 19            | 8             | 0           | -1.974546               | -1.477266 | 1.396620  |
| 20            | 6             | 0           | -4.081487               | -0.643102 | -0.088317 |
| 21            | 9             | 0           | -4.840719               | -1.712093 | 0.166053  |
| 22            | 9             | 0           | -4.319055               | 0.299771  | 0.823950  |
| 23            | 9             | 0           | -4.359151               | -0.175438 | -1.304405 |
| 24            | 1             | 0           | 1.070909                | 0.394943  | 2.444425  |
| 25            | 35            | 0           | 5.262906                | -0.534213 | -0.127591 |

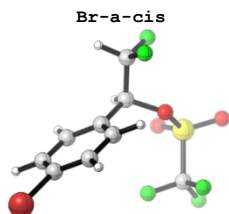

Standard orientation:

| Center Number | Atomic Number | Atomic Type | Coordinates (Angstroms) |           |           |
|---------------|---------------|-------------|-------------------------|-----------|-----------|
|               |               |             | X                       | Y         | Z         |
| 1             | 6             | 0           | -1.278118               | 2.825343  | 0.078602  |
| 2             | 9             | 0           | -1.041795               | 3.045691  | -1.254544 |
| 3             | 9             | 0           | -2.586882               | 3.165983  | 0.314802  |
| 4             | 8             | 0           | -1.944587               | 0.587174  | -0.434037 |
| 5             | 6             | 0           | -1.053635               | 1.357110  | 0.446640  |
| 6             | 6             | 0           | 0.374458                | 0.896539  | 0.295477  |
| 7             | 6             | 0           | 1.133942                | 0.650821  | 1.445220  |
| 8             | 6             | 0           | 0.957958                | 0.724452  | -0.967810 |
| 9             | 6             | 0           | 2.464723                | 0.241116  | 1.344783  |
| 10            | 6             | 0           | 2.283358                | 0.308119  | -1.080938 |
| 11            | 6             | 0           | 3.022892                | 0.071768  | 0.079377  |
| 12            | 1             | 0           | 3.048257                | 0.047975  | 2.237508  |
| 13            | 1             | 0           | 2.731592                | 0.169452  | -2.058082 |
| 14            | 1             | 0           | -0.634820               | 3.490511  | 0.659990  |
| 15            | 1             | 0           | -1.388763               | 1.236134  | 1.479385  |
| 16            | 16            | 0           | -3.033101               | -0.445579 | 0.175302  |
| 17            | 8             | 0           | -3.108926               | -0.319944 | 1.625649  |
| 18            | 8             | 0           | -4.202416               | -0.394290 | -0.683297 |
| 19            | 8             | 0           | -2.166473               | -2.082774 | -0.195808 |
| 20            | 9             | 0           | -2.965906               | -3.075316 | 0.201115  |
| 21            | 9             | 0           | -1.934807               | -2.189353 | -1.503917 |
| 22            | 9             | 0           | -1.012028               | -2.145911 | 0.471248  |
| 23            | 1             | 0           | 0.689830                | 0.770293  | 2.429473  |
| 24            | 1             | 0           | 0.379085                | 0.905855  | -1.866819 |
| 25            | 35            | 0           | 4.834000                | -0.503980 | -0.070984 |

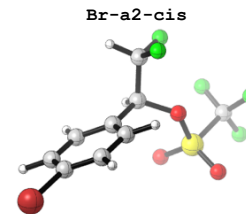

Standard orientation:

| Center Number | Atomic Number | Atomic Type | Coordinates (Angstroms) |           |           |
|---------------|---------------|-------------|-------------------------|-----------|-----------|
|               |               |             | X                       | Y         | Z         |
| 1             | 6             | 0           | -1.023063               | 2.422854  | 0.228127  |
| 2             | 9             | 0           | -0.777939               | 2.770184  | -1.075661 |
| 3             | 9             | 0           | -2.348832               | 2.685854  | 0.469898  |
| 4             | 8             | 0           | -1.580770               | 0.221748  | -0.493197 |
| 5             | 6             | 0           | -0.735215               | 0.939085  | 0.469959  |
| 6             | 6             | 0           | 0.719167                | 0.568903  | 0.305936  |
| 7             | 6             | 0           | 1.491437                | 0.321487  | 1.446748  |
| 8             | 6             | 0           | 1.312345                | 0.487063  | -0.961428 |
| 9             | 6             | 0           | 2.845727                | 0.002482  | 1.333487  |
| 10            | 6             | 0           | 2.661787                | 0.160794  | -1.087744 |
| 11            | 6             | 0           | 3.414403                | -0.075951 | 0.063771  |
| 12            | 1             | 0           | 3.439333                | -0.192572 | 2.219055  |
| 13            | 1             | 0           | 3.117765                | 0.090817  | -2.068583 |
| 14            | 1             | 0           | -0.418595               | 3.060048  | 0.878486  |
| 15            | 1             | 0           | -1.071613               | 0.708188  | 1.483440  |
| 16            | 16            | 0           | -2.266222               | -1.188850 | -0.086774 |
| 17            | 8             | 0           | -2.149240               | -2.077468 | -1.229222 |
| 18            | 8             | 0           | -1.877803               | -1.581178 | 1.262240  |
| 19            | 6             | 0           | -4.070994               | -0.635846 | -0.010159 |
| 20            | 9             | 0           | -4.823782               | -1.712617 | 0.228848  |
| 21            | 9             | 0           | -4.228560               | 0.246895  | 0.977958  |
| 22            | 9             | 0           | -4.430570               | -0.085594 | -1.168516 |
| 23            | 1             | 0           | 1.039416                | 0.366983  | 2.433546  |
| 24            | 35            | 0           | 5.259629                | -0.527758 | -0.104219 |
| 25            | 1             | 0           | 0.722344                | 0.667136  | -1.853370 |

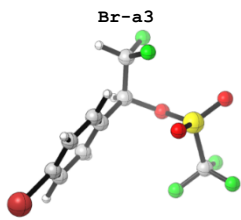

Standard orientation:

| Center Number | Atomic Number | Atomic Type | Coordinates (Angstroms) |           |           |
|---------------|---------------|-------------|-------------------------|-----------|-----------|
|               |               |             | X                       | Y         | Z         |
| 1             | 6             | 0           | -1.440133               | 2.762408  | 0.257925  |
| 2             | 9             | 0           | -1.718397               | 2.598223  | -1.078061 |
| 3             | 9             | 0           | -2.599838               | 3.192204  | 0.851402  |
| 4             | 8             | 0           | -2.072935               | 0.438843  | 0.728467  |
| 5             | 6             | 0           | -0.997726               | 1.447771  | 0.897109  |
| 6             | 6             | 0           | 0.395611                | 0.973074  | 0.563128  |
| 7             | 6             | 0           | 1.086766                | 0.249629  | 1.546375  |
| 8             | 6             | 0           | 1.035707                | 1.254935  | -0.651962 |
| 9             | 6             | 0           | 2.386861                | -0.201054 | 1.324449  |
| 10            | 6             | 0           | 2.339388                | 0.817730  | -0.883392 |
| 11            | 1             | 0           | 0.523638                | 1.801290  | -1.434981 |
| 12            | 6             | 0           | 2.999886                | 0.090454  | 0.106214  |
| 13            | 1             | 0           | 2.912169                | -0.761913 | 2.088848  |
| 14            | 1             | 0           | 2.828309                | 1.037356  | -1.825399 |
| 15            | 1             | 0           | -1.064097               | 1.606233  | 1.975775  |
| 16            | 16            | 0           | -2.448010               | -0.380640 | -0.618952 |
| 17            | 8             | 0           | -3.812630               | -0.054589 | -1.001900 |
| 18            | 8             | 0           | -1.363539               | -0.406759 | -1.588723 |
| 19            | 6             | 0           | -2.508424               | -2.078896 | 0.203674  |
| 20            | 9             | 0           | -3.414882               | -2.088010 | 1.182024  |
| 21            | 9             | 0           | -2.848540               | -2.974425 | -0.727922 |
| 22            | 9             | 0           | -1.309452               | -2.389828 | 0.701226  |
| 23            | 1             | 0           | -0.686494               | 3.546288  | 0.365064  |
| 24            | 1             | 0           | 0.608937                | 0.033086  | 2.497794  |
| 25            | 35            | 0           | 4.779168                | -0.512338 | -0.211593 |

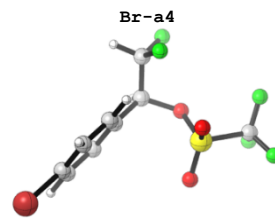

Standard orientation:

| Center Number | Atomic Number | Atomic Type | Coordinates (Angstroms) |           |           |
|---------------|---------------|-------------|-------------------------|-----------|-----------|
|               |               |             | X                       | Y         | Z         |
| 1             | 6             | 0           | -1.220846               | 2.696766  | -0.039335 |
| 2             | 9             | 0           | -1.447994               | 2.399489  | -1.358071 |
| 3             | 9             | 0           | -2.400090               | 3.192606  | 0.462770  |
| 4             | 8             | 0           | -1.920334               | 0.481241  | 0.637129  |
| 5             | 6             | 0           | -0.810790               | 1.460034  | 0.760107  |
| 6             | 6             | 0           | 0.577174                | 0.935205  | 0.481553  |
| 7             | 6             | 0           | 1.359195                | 0.535006  | 1.575442  |
| 8             | 6             | 0           | 1.120317                | 0.862055  | -0.810721 |
| 9             | 6             | 0           | 2.655509                | 0.057917  | 1.392411  |
| 10            | 6             | 0           | 2.417680                | 0.389432  | -1.005250 |
| 11            | 1             | 0           | 0.535758                | 1.157867  | -1.673240 |
| 12            | 6             | 0           | 3.170851                | -0.010191 | 0.098325  |
| 13            | 1             | 0           | 3.251899                | -0.251139 | 2.242802  |
| 14            | 1             | 0           | 2.832854                | 0.334449  | -2.004814 |
| 15            | 1             | 0           | -0.877329               | 1.743196  | 1.812706  |
| 16            | 16            | 0           | -1.849689               | -0.916710 | -0.172194 |
| 17            | 8             | 0           | -1.587750               | -0.725367 | -1.592578 |
| 18            | 8             | 0           | -1.130842               | -1.929210 | 0.590916  |
| 19            | 6             | 0           | -3.697557               | -1.260096 | 0.026526  |
| 20            | 9             | 0           | -3.944448               | -2.433956 | -0.563588 |
| 21            | 9             | 0           | -4.021934               | -1.335136 | 1.317645  |
| 22            | 9             | 0           | -4.413426               | -0.305349 | -0.565384 |
| 23            | 1             | 0           | -0.464629               | 3.484139  | 0.018329  |
| 24            | 1             | 0           | 0.954261                | 0.591315  | 2.581598  |
| 25            | 35            | 0           | 4.945584                | -0.647469 | -0.166306 |

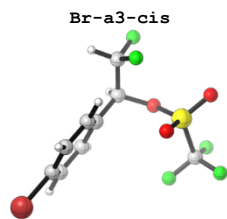

Standard orientation:

| Center Number | Atomic Number | Atomic Type | Coordinates (Angstroms) |           |           |
|---------------|---------------|-------------|-------------------------|-----------|-----------|
|               |               |             | X                       | Y         | Z         |
| 1             | 6             | 0           | -1.440411               | 2.762472  | 0.257999  |
| 2             | 9             | 0           | -1.718606               | 2.598429  | -1.077990 |
| 3             | 9             | 0           | -2.600155               | 3.192255  | 0.851459  |
| 4             | 8             | 0           | -2.073135               | 0.438865  | 0.728282  |
| 5             | 6             | 0           | -0.998098               | 1.447727  | 0.897102  |
| 6             | 6             | 0           | 0.395324                | 0.973156  | 0.563146  |
| 7             | 6             | 0           | 1.086493                | 0.249704  | 1.546369  |
| 8             | 6             | 0           | 1.035404                | 1.255031  | -0.651956 |
| 9             | 6             | 0           | 2.386596                | -0.200962 | 1.324419  |
| 10            | 6             | 0           | 2.339076                | 0.817832  | -0.883411 |
| 11            | 6             | 0           | 2.999588                | 0.090519  | 0.106165  |
| 12            | 1             | 0           | 2.911944                | -0.761777 | 2.088824  |
| 13            | 1             | 0           | 2.827989                | 1.037508  | -1.825411 |
| 14            | 1             | 0           | -1.064510               | 1.606155  | 1.975777  |
| 15            | 16            | 0           | -2.447916               | -0.380916 | -0.619132 |
| 16            | 8             | 0           | -3.812633               | -0.055299 | -1.002039 |
| 17            | 8             | 0           | -1.363441               | -0.406687 | -1.588894 |
| 18            | 6             | 0           | -2.507698               | -2.079078 | 0.203755  |
| 19            | 9             | 0           | -3.414201               | -2.088362 | 1.182055  |
| 20            | 9             | 0           | -2.847408               | -2.974969 | -0.727643 |
| 21            | 9             | 0           | -1.308625               | -2.389410 | 0.701414  |
| 22            | 1             | 0           | -0.686753               | 3.546330  | 0.365282  |
| 23            | 1             | 0           | 0.608674                | 0.033145  | 2.497794  |
| 24            | 35            | 0           | 4.778942                | -0.512087 | -0.211577 |
| 25            | 1             | 0           | 0.523323                | 1.801433  | -1.434933 |

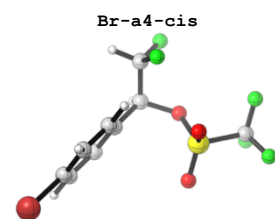

Standard orientation:

| Center Number | Atomic Number | Atomic Type | Coordinates (Angstroms) |           |           |
|---------------|---------------|-------------|-------------------------|-----------|-----------|
|               |               |             | X                       | Y         | Z         |
| 1             | 6             | 0           | -1.221085               | 2.696658  | -0.039332 |
| 2             | 9             | 0           | -1.448334               | 2.399290  | -1.358027 |
| 3             | 9             | 0           | -2.400363               | 3.192344  | 0.462857  |
| 4             | 8             | 0           | -1.920137               | 0.480989  | 0.637522  |
| 5             | 6             | 0           | -0.810785               | 1.460079  | 0.760177  |
| 6             | 6             | 0           | 0.577214                | 0.935348  | 0.481630  |
| 7             | 6             | 0           | 1.359169                | 0.534882  | 1.575486  |
| 8             | 6             | 0           | 1.120406                | 0.862437  | -0.810628 |
| 9             | 6             | 0           | 2.655456                | 0.057769  | 1.392414  |
| 10            | 6             | 0           | 2.417769                | 0.389794  | -1.005199 |
| 11            | 6             | 0           | 3.170854                | -0.010086 | 0.098328  |
| 12            | 1             | 0           | 3.251820                | -0.251501 | 2.242745  |
| 13            | 1             | 0           | 2.832929                | 0.334994  | -2.004753 |
| 14            | 1             | 0           | -0.877355               | 1.743379  | 1.812735  |
| 15            | 16            | 0           | -1.849609               | -0.916684 | -0.172302 |
| 16            | 8             | 0           | -1.587777               | -0.724895 | -1.592645 |
| 17            | 8             | 0           | -1.130723               | -1.929454 | 0.590416  |
| 18            | 6             | 0           | -3.697449               | -1.260131 | 0.026519  |
| 19            | 9             | 0           | -3.944431               | -2.433767 | -0.563997 |
| 20            | 9             | 0           | -4.021631               | -1.335651 | 1.317661  |
| 21            | 9             | 0           | -4.413432               | -0.305177 | -0.564925 |
| 22            | 1             | 0           | -0.464976               | 3.484141  | 0.018245  |
| 23            | 1             | 0           | 0.954165                | 0.590978  | 2.581621  |
| 24            | 1             | 0           | 0.535919                | 1.158468  | -1.673121 |
| 25            | 35            | 0           | 4.945563                | -0.647443 | -0.166327 |

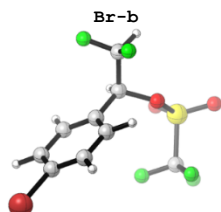

Standard orientation:

| Center Number | Atomic Number | Atomic Type | Coordinates (Angstroms) |           |           |
|---------------|---------------|-------------|-------------------------|-----------|-----------|
|               |               |             | X                       | Y         | Z         |
| 1             | 6             | 0           | -1.304652               | 2.863525  | -0.094446 |
| 2             | 9             | 0           | -0.545774               | 3.664820  | 0.721946  |
| 3             | 9             | 0           | -0.869014               | 3.059690  | -1.378835 |
| 4             | 8             | 0           | -2.026376               | 0.646861  | -0.518252 |
| 5             | 6             | 0           | -1.103948               | 1.406953  | 0.345057  |
| 6             | 6             | 0           | 0.301115                | 0.879526  | 0.219029  |
| 7             | 6             | 0           | 1.062360                | 0.692188  | 1.378627  |
| 8             | 6             | 0           | 0.862362                | 0.583044  | -1.031154 |
| 9             | 6             | 0           | 2.371404                | 0.214486  | 1.300565  |
| 10            | 6             | 0           | 2.166872                | 0.100310  | -1.121556 |
| 11            | 1             | 0           | 0.281718                | 0.717985  | -1.936926 |
| 12            | 6             | 0           | 2.907318                | -0.078581 | 0.048085  |
| 13            | 1             | 0           | 2.956002                | 0.066666  | 2.201243  |
| 14            | 1             | 0           | 2.597717                | -0.133610 | -2.088350 |
| 15            | 1             | 0           | -2.346663               | 3.184991  | -0.033739 |
| 16            | 1             | 0           | -1.453498               | 1.340109  | 1.377895  |
| 17            | 16            | 0           | -3.150061               | -0.335122 | 0.114800  |
| 18            | 8             | 0           | -3.305681               | -0.084357 | 1.542213  |
| 19            | 8             | 0           | -4.267367               | -0.340268 | -0.812277 |
| 20            | 6             | 0           | -2.292650               | -2.009540 | -0.067890 |
| 21            | 9             | 0           | -3.143349               | -2.955398 | 0.334748  |
| 22            | 9             | 0           | -1.963637               | -2.213592 | -1.342643 |
| 23            | 9             | 0           | -1.195871               | -2.041597 | 0.691271  |
| 24            | 1             | 0           | 0.636319                | 0.912814  | 2.353092  |
| 25            | 35            | 0           | 4.690357                | -0.744047 | -0.071422 |

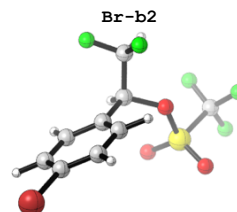

Standard orientation:

| Center Number | Atomic Number | Atomic Type | Coordinates (Angstroms) |           |           |
|---------------|---------------|-------------|-------------------------|-----------|-----------|
|               |               |             | X                       | Y         | Z         |
| 1             | 6             | 0           | -1.098017               | 2.463667  | -0.051329 |
| 2             | 9             | 0           | -0.391743               | 3.302906  | 0.773418  |
| 3             | 9             | 0           | -0.679074               | 2.702411  | -1.334002 |
| 4             | 8             | 0           | -1.688739               | 0.224054  | -0.492811 |
| 5             | 6             | 0           | -0.799844               | 1.019120  | 0.371680  |
| 6             | 6             | 0           | 0.636878                | 0.586542  | 0.231855  |
| 7             | 6             | 0           | 1.420501                | 0.453172  | 1.384073  |
| 8             | 6             | 0           | 1.204002                | 0.325372  | -1.023232 |
| 9             | 6             | 0           | 2.759629                | 0.071136  | 1.293239  |
| 10            | 6             | 0           | 2.538738                | -0.063252 | -1.126541 |
| 11            | 1             | 0           | 0.604493                | 0.413062  | -1.922448 |
| 12            | 6             | 0           | 3.302575                | -0.183953 | 0.035413  |
| 13            | 1             | 0           | 3.361941                | -0.034731 | 2.188054  |
| 14            | 1             | 0           | 2.974298                | -0.270749 | -2.097177 |
| 15            | 1             | 0           | -2.158611               | 2.716430  | 0.013677  |
| 16            | 1             | 0           | -1.129331               | 0.915336  | 1.407951  |
| 17            | 16            | 0           | -2.364519               | -1.139633 | 0.072280  |
| 18            | 8             | 0           | -2.170847               | -2.186509 | -0.914852 |
| 19            | 8             | 0           | -2.053232               | -1.319327 | 1.484518  |
| 20            | 6             | 0           | -4.172089               | -0.605047 | -0.041008 |
| 21            | 9             | 0           | -4.935193               | -1.615420 | 0.378426  |
| 22            | 9             | 0           | -4.372312               | 0.460612  | 0.740224  |
| 23            | 9             | 0           | -4.480823               | -0.300618 | -1.300737 |
| 24            | 1             | 0           | 0.988421                | 0.640674  | 2.362750  |
| 25            | 35            | 0           | 5.127763                | -0.721177 | -0.099571 |

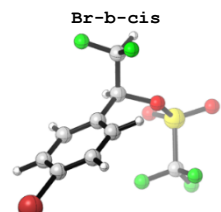

Standard orientation:

| Center Number | Atomic Number | Atomic Type | Coordinates (Angstroms) |           |           |
|---------------|---------------|-------------|-------------------------|-----------|-----------|
|               |               |             | X                       | Y         | Z         |
| 1             | 6             | 0           | -1.304314               | 2.863245  | -0.094985 |
| 2             | 9             | 0           | -0.545613               | 3.664973  | 0.721152  |
| 3             | 9             | 0           | -0.868631               | 3.058967  | -1.379432 |
| 4             | 8             | 0           | -2.025384               | 0.646011  | -0.517943 |
| 5             | 6             | 0           | -1.103220               | 1.406948  | 0.345044  |
| 6             | 6             | 0           | 0.301875                | 0.879737  | 0.219000  |
| 7             | 6             | 0           | 1.063175                | 0.692349  | 1.378553  |
| 8             | 6             | 0           | 0.863303                | 0.583316  | -1.031098 |
| 9             | 6             | 0           | 2.372159                | 0.214585  | 1.300623  |
| 10            | 6             | 0           | 2.167756                | 0.100522  | -1.121507 |
| 11            | 6             | 0           | 2.908224                | -0.078432 | 0.048149  |
| 12            | 1             | 0           | 2.956640                | 0.066614  | 2.201336  |
| 13            | 1             | 0           | 2.598603                | -0.133448 | -2.088275 |
| 14            | 1             | 0           | -2.346378               | 3.184566  | -0.034461 |
| 15            | 1             | 0           | -1.452605               | 1.340175  | 1.377927  |
| 16            | 16            | 0           | -3.150096               | -0.334367 | 0.115741  |
| 17            | 8             | 0           | -3.303892               | -0.084012 | 1.543439  |
| 18            | 8             | 0           | -4.268464               | -0.337458 | -0.810062 |
| 19            | 6             | 0           | -2.294685               | -2.009570 | -0.068656 |
| 20            | 9             | 0           | -3.145894               | -2.954896 | 0.334339  |
| 21            | 9             | 0           | -1.967101               | -2.213410 | -1.343824 |
| 22            | 9             | 0           | -1.197256               | -2.043051 | 0.689409  |
| 23            | 1             | 0           | 0.637208                | 0.912939  | 2.353065  |
| 24            | 1             | 0           | 0.282873                | 0.718308  | -1.937011 |
| 25            | 35            | 0           | 4.690913                | -0.744716 | -0.071241 |

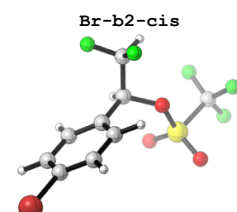

Standard orientation:

| Center Number | Atomic Number | Atomic Type | Coordinates (Angstroms) |           |           |
|---------------|---------------|-------------|-------------------------|-----------|-----------|
|               |               |             | X                       | Y         | Z         |
| 1             | 6             | 0           | -1.097336               | 2.463717  | -0.052224 |
| 2             | 9             | 0           | -0.390711               | 3.303146  | 0.772030  |
| 3             | 9             | 0           | -0.678209               | 2.701470  | -1.335011 |
| 4             | 8             | 0           | -1.689174               | 0.224308  | -0.492343 |
| 5             | 6             | 0           | -0.799786               | 1.019279  | 0.371577  |
| 6             | 6             | 0           | 0.636824                | 0.586208  | 0.231760  |
| 7             | 6             | 0           | 1.421035                | 0.455233  | 1.383849  |
| 8             | 6             | 0           | 1.203259                | 0.322725  | -1.023135 |
| 9             | 6             | 0           | 2.760187                | 0.073270  | 1.293025  |
| 10            | 6             | 0           | 2.538014                | -0.065889 | -1.126359 |
| 11            | 6             | 0           | 3.302505                | -0.184166 | 0.035407  |
| 12            | 1             | 0           | 3.362981                | -0.030747 | 2.187738  |
| 13            | 1             | 0           | 2.973082                | -0.275232 | -2.096824 |
| 14            | 1             | 0           | -2.157825               | 2.716971  | 0.012626  |
| 15            | 1             | 0           | -1.129212               | 0.916131  | 1.407938  |
| 16            | 16            | 0           | -2.364747               | -1.139274 | 0.073225  |
| 17            | 8             | 0           | -2.170387               | -2.186793 | -0.913098 |
| 18            | 8             | 0           | -2.054112               | -1.317991 | 1.485741  |
| 19            | 6             | 0           | -4.172302               | -0.604943 | -0.041243 |
| 20            | 9             | 0           | -4.935491               | -1.615395 | 0.377816  |
| 21            | 9             | 0           | -4.373068               | 0.460741  | 0.739822  |
| 22            | 9             | 0           | -4.480384               | -0.300597 | -1.301145 |
| 23            | 1             | 0           | 0.989344                | 0.644480  | 2.362356  |
| 24            | 1             | 0           | 0.603213                | 0.408619  | -1.922169 |
| 25            | 35            | 0           | 5.127717                | -0.721283 | -0.099520 |

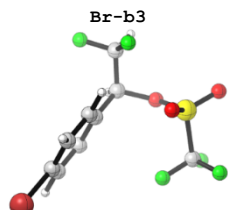

Standard orientation:

| Center Number | Atomic Number | Atomic Type | Coordinates (Angstroms) |           |           |
|---------------|---------------|-------------|-------------------------|-----------|-----------|
|               |               |             | X                       | Y         | Z         |
| 1             | 6             | 0           | -1.628566               | 2.804798  | 0.283778  |
| 2             | 9             | 0           | -0.713858               | 3.780925  | 0.592569  |
| 3             | 9             | 0           | -1.718858               | 2.742101  | -1.083790 |
| 4             | 8             | 0           | -2.265194               | 0.508289  | 0.759365  |
| 5             | 6             | 0           | -1.147153               | 1.488234  | 0.900593  |
| 6             | 6             | 0           | 0.228546                | 0.985262  | 0.549634  |
| 7             | 6             | 0           | 0.972836                | 0.390407  | 1.580069  |
| 8             | 6             | 0           | 0.801575                | 1.098131  | -0.726194 |
| 9             | 6             | 0           | 2.256387                | -0.100983 | 1.349577  |
| 10            | 6             | 0           | 2.087224                | 0.616296  | -0.968005 |
| 11            | 1             | 0           | 0.250365                | 1.551024  | -1.539533 |
| 12            | 6             | 0           | 2.799031                | 0.016820  | 0.070895  |
| 13            | 1             | 0           | 2.822710                | -0.558671 | 2.152317  |
| 14            | 1             | 0           | 2.524755                | 0.706000  | -1.955540 |
| 15            | 1             | 0           | -1.190303               | 1.645426  | 1.980324  |
| 16            | 16            | 0           | -2.644375               | -0.410288 | -0.517875 |
| 17            | 8             | 0           | -4.092323               | -0.368486 | -0.646935 |
| 18            | 8             | 0           | -1.759655               | -0.208234 | -1.653994 |
| 19            | 6             | 0           | -2.228807               | -2.095443 | 0.226568  |
| 20            | 9             | 0           | -2.902672               | -2.273608 | 1.364387  |
| 21            | 9             | 0           | -2.583142               | -3.035211 | -0.653957 |
| 22            | 9             | 0           | -0.919093               | -2.180896 | 0.465378  |
| 23            | 1             | 0           | -2.604828               | 3.105180  | 0.670211  |
| 24            | 1             | 0           | 0.548939                | 0.306887  | 2.576916  |
| 25            | 35            | 0           | 4.559655                | -0.633278 | -0.257970 |

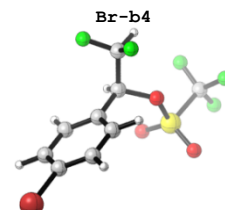

Standard orientation:

| Center Number | Atomic Number | Atomic Type | Coordinates (Angstroms) |           |           |
|---------------|---------------|-------------|-------------------------|-----------|-----------|
|               |               |             | X                       | Y         | Z         |
| 1             | 6             | 0           | -1.096914               | 2.463638  | -0.052668 |
| 2             | 9             | 0           | -0.390838               | 3.303353  | 0.771885  |
| 3             | 9             | 0           | -0.677008               | 2.700897  | -1.335230 |
| 4             | 8             | 0           | -1.689195               | 0.224424  | -0.492416 |
| 5             | 6             | 0           | -0.799694               | 1.019264  | 0.371551  |
| 6             | 6             | 0           | 0.636814                | 0.585948  | 0.231882  |
| 7             | 6             | 0           | 1.421073                | 0.455157  | 1.383944  |
| 8             | 6             | 0           | 1.203087                | 0.321913  | -1.022977 |
| 9             | 6             | 0           | 2.760208                | 0.073115  | 1.293084  |
| 10            | 6             | 0           | 2.537815                | -0.066735 | -1.126239 |
| 11            | 1             | 0           | 0.602887                | 0.407511  | -1.921945 |
| 12            | 6             | 0           | 3.302423                | -0.184668 | 0.035498  |
| 13            | 1             | 0           | 3.363089                | -0.030566 | 2.187778  |
| 14            | 1             | 0           | 2.972813                | -0.276292 | -2.096690 |
| 15            | 1             | 0           | -1.129268               | 0.916192  | 1.407862  |
| 16            | 16            | 0           | -2.364916               | -1.139092 | 0.073233  |
| 17            | 8             | 0           | -2.170803               | -2.186792 | -0.913020 |
| 18            | 8             | 0           | -2.054091               | -1.317904 | 1.485718  |
| 19            | 6             | 0           | -4.172571               | -0.604630 | -0.041180 |
| 20            | 9             | 0           | -4.935656               | -1.615053 | 0.378104  |
| 21            | 9             | 0           | -4.373331               | 0.461148  | 0.739725  |
| 22            | 9             | 0           | -4.480753               | -0.300542 | -1.301111 |
| 23            | 1             | 0           | -2.157429               | 2.716915  | 0.011471  |
| 24            | 1             | 0           | 0.989514                | 0.644726  | 2.362450  |
| 25            | 35            | 0           | 5.127845                | -0.721059 | -0.099504 |

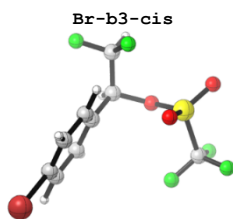

Standard orientation:

| Center Number | Atomic Number | Atomic Type | Coordinates (Angstroms) |           |           |
|---------------|---------------|-------------|-------------------------|-----------|-----------|
|               |               |             | X                       | Y         | Z         |
| 1             | 6             | 0           | -1.355774               | 2.785342  | 0.104674  |
| 2             | 9             | 0           | -0.520505               | 3.827815  | 0.320887  |
| 3             | 9             | 0           | -1.356996               | 2.545096  | -1.220086 |
| 4             | 8             | 0           | -2.046642               | 0.536420  | 0.756456  |
| 5             | 6             | 0           | -0.959842               | 1.511326  | 0.869861  |
| 6             | 6             | 0           | 0.421153                | 0.939397  | 0.592889  |
| 7             | 6             | 0           | 1.388587                | 0.813852  | 1.615690  |
| 8             | 6             | 0           | 0.794592                | 0.494974  | -0.680862 |
| 9             | 6             | 0           | 2.649821                | 0.266777  | 1.381644  |
| 10            | 6             | 0           | 2.065395                | -0.027579 | -0.933852 |
| 11            | 6             | 0           | 2.995957                | -0.145104 | 0.096286  |
| 12            | 1             | 0           | 3.351080                | 0.183806  | 2.203180  |
| 13            | 1             | 0           | 2.315306                | -0.350789 | -1.939632 |
| 14            | 1             | 0           | -1.034562               | 1.777082  | 1.923434  |
| 15            | 16            | 0           | -2.437057               | -0.316760 | -0.586576 |
| 16            | 8             | 0           | -3.574480               | 0.296713  | -1.252089 |
| 17            | 8             | 0           | -1.252948               | -0.735445 | -1.322468 |
| 18            | 6             | 0           | -3.096278               | -1.802171 | 0.382642  |
| 19            | 9             | 0           | -4.080817               | -1.421854 | 1.192855  |
| 20            | 9             | 0           | -3.561220               | -2.678325 | -0.511208 |
| 21            | 9             | 0           | -2.114464               | -2.360827 | 1.088168  |
| 22            | 1             | 0           | -2.343254               | 3.090057  | 0.382038  |
| 23            | 1             | 0           | 1.210800                | 1.134397  | 2.620948  |
| 24            | 1             | 0           | 0.096016                | 0.540755  | -1.490057 |
| 25            | 35            | 0           | 4.733555                | -0.866191 | -0.233693 |

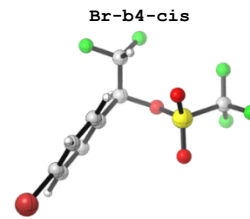

Standard orientation:

| Center Number | Atomic Number | Atomic Type | Coordinates (Angstroms) |           |           |
|---------------|---------------|-------------|-------------------------|-----------|-----------|
|               |               |             | X                       | Y         | Z         |
| 1             | 6             | 0           | -1.097427               | 2.463535  | -0.052296 |
| 2             | 9             | 0           | -0.391131               | 3.302898  | 0.772318  |
| 3             | 9             | 0           | -0.677973               | 2.701573  | -1.334928 |
| 4             | 8             | 0           | -1.689040               | 0.224027  | -0.492669 |
| 5             | 6             | 0           | -0.799815               | 1.019081  | 0.371393  |
| 6             | 6             | 0           | 0.636849                | 0.586138  | 0.231650  |
| 7             | 6             | 0           | 1.420992                | 0.455024  | 1.383790  |
| 8             | 6             | 0           | 1.203399                | 0.322771  | -1.023213 |
| 9             | 6             | 0           | 2.760151                | 0.073101  | 1.293039  |
| 10            | 6             | 0           | 2.538184                | -0.065775 | -1.126378 |
| 11            | 6             | 0           | 3.302583                | -0.184153 | 0.035425  |
| 12            | 1             | 0           | 3.362882                | -0.031004 | 2.187782  |
| 13            | 1             | 0           | 2.973340                | -0.274959 | -2.096838 |
| 14            | 1             | 0           | -1.129335               | 0.915817  | 1.407710  |
| 15            | 16            | 0           | -2.364846               | -1.139393 | 0.072966  |
| 16            | 8             | 0           | -2.170994               | -2.186851 | -0.913529 |
| 17            | 8             | 0           | -2.053839               | -1.318306 | 1.485371  |
| 18            | 6             | 0           | -4.172338               | -0.604731 | -0.041016 |
| 19            | 9             | 0           | -4.935581               | -1.615069 | 0.378230  |
| 20            | 9             | 0           | -4.372771               | 0.460991  | 0.740084  |
| 21            | 9             | 0           | -4.480652               | -0.300354 | -1.300850 |
| 22            | 1             | 0           | -2.157954               | 2.716677  | 0.012263  |
| 23            | 1             | 0           | 0.989255                | 0.644202  | 2.362288  |
| 24            | 1             | 0           | 0.603439                | 0.408750  | -1.922292 |
| 25            | 35            | 0           | 5.127840                | -0.721156 | -0.099423 |



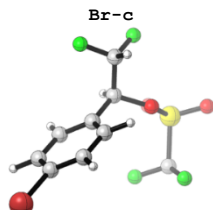

Standard orientation:

| Center Number | Atomic Number | Atomic Type | Coordinates (Angstroms) |           |           |
|---------------|---------------|-------------|-------------------------|-----------|-----------|
|               |               |             | X                       | Y         | Z         |
| 1             | 6             | 0           | -1.214580               | 2.738963  | -0.371680 |
| 2             | 9             | 0           | -2.522791               | 3.119808  | -0.209745 |
| 3             | 9             | 0           | -0.445599               | 3.602075  | 0.368246  |
| 4             | 8             | 0           | -1.882059               | 0.476521  | -0.653070 |
| 5             | 6             | 0           | -1.019527               | 1.324631  | 0.187165  |
| 6             | 6             | 0           | 0.402419                | 0.835867  | 0.112655  |
| 7             | 6             | 0           | 1.140966                | 0.678979  | 1.290810  |
| 8             | 6             | 0           | 1.006388                | 0.563281  | -1.123022 |
| 9             | 6             | 0           | 2.470176                | 0.256370  | 1.244218  |
| 10            | 6             | 0           | 2.330915                | 0.133327  | -1.182534 |
| 11            | 1             | 0           | 0.443697                | 0.666574  | -2.045785 |
| 12            | 6             | 0           | 3.049430                | -0.013078 | 0.005280  |
| 13            | 1             | 0           | 3.038829                | 0.133754  | 2.158808  |
| 14            | 1             | 0           | 2.794218                | -0.084378 | -2.138026 |
| 15            | 1             | 0           | -0.952056               | 2.848312  | -1.426175 |
| 16            | 1             | 0           | -1.394806               | 1.316315  | 1.213001  |
| 17            | 16            | 0           | -3.116774               | -0.362232 | -0.020771 |
| 18            | 8             | 0           | -3.383219               | 0.057886  | 1.348289  |
| 19            | 8             | 0           | -4.144715               | -0.432109 | -1.043365 |
| 20            | 6             | 0           | -2.324059               | -2.074105 | 0.071844  |
| 21            | 9             | 0           | -3.244825               | -2.940138 | 0.498973  |
| 22            | 9             | 0           | -1.886457               | -2.441428 | -1.132168 |
| 23            | 9             | 0           | -1.302755               | -2.046289 | 0.931631  |
| 24            | 1             | 0           | 0.682468                | 0.884946  | 2.253507  |
| 25            | 35            | 0           | 4.860144                | -0.602853 | -0.069105 |

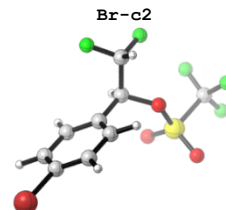

Standard orientation:

| Center Number | Atomic Number | Atomic Type | Coordinates (Angstroms) |           |           |
|---------------|---------------|-------------|-------------------------|-----------|-----------|
|               |               |             | X                       | Y         | Z         |
| 1             | 6             | 0           | -1.014141               | 2.347783  | -0.456626 |
| 2             | 9             | 0           | -2.332235               | 2.686134  | -0.281035 |
| 3             | 9             | 0           | -0.263168               | 3.288969  | 0.201160  |
| 4             | 8             | 0           | -1.591664               | 0.064460  | -0.582047 |
| 5             | 6             | 0           | -0.740363               | 0.983506  | 0.188168  |
| 6             | 6             | 0           | 0.706508                | 0.567146  | 0.116423  |
| 7             | 6             | 0           | 1.491365                | 0.606515  | 1.274227  |
| 8             | 6             | 0           | 1.285191                | 0.175214  | -1.098465 |
| 9             | 6             | 0           | 2.843614                | 0.265250  | 1.226679  |
| 10            | 6             | 0           | 2.633345                | -0.175053 | -1.157718 |
| 11            | 1             | 0           | 0.684378                | 0.122519  | -2.000987 |
| 12            | 6             | 0           | 3.398636                | -0.122668 | 0.008156  |
| 13            | 1             | 0           | 3.448257                | 0.293898  | 2.125763  |
| 14            | 1             | 0           | 3.078098                | -0.485520 | -2.096158 |
| 15            | 1             | 0           | -0.784549               | 2.396145  | -1.523371 |
| 16            | 1             | 0           | -1.087381               | 1.020536  | 1.223278  |
| 17            | 16            | 0           | -2.315778               | -1.191965 | 0.144990  |
| 18            | 8             | 0           | -2.152672               | -2.351585 | -0.714096 |
| 19            | 8             | 0           | -2.003242               | -1.212476 | 1.567902  |
| 20            | 6             | 0           | -4.112547               | -0.634981 | -0.032298 |
| 21            | 9             | 0           | -4.895391               | -1.613205 | 0.428767  |
| 22            | 9             | 0           | -4.314752               | 0.473348  | 0.680346  |
| 23            | 9             | 0           | -4.392042               | -0.404357 | -1.314920 |
| 24            | 1             | 0           | 1.050874                | 0.901978  | 2.221835  |
| 25            | 35            | 0           | 5.242058                | -0.603873 | -0.065269 |

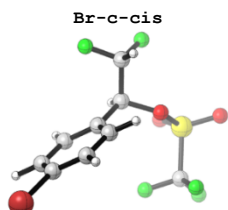

Standard orientation:

| Center Number | Atomic Number | Atomic Type | Coordinates (Angstroms) |           |           |
|---------------|---------------|-------------|-------------------------|-----------|-----------|
|               |               |             | X                       | Y         | Z         |
| 1             | 6             | 0           | -1.214902               | 2.739061  | -0.371526 |
| 2             | 9             | 0           | -2.523085               | 3.119892  | -0.209369 |
| 3             | 9             | 0           | -0.445839               | 3.602088  | 0.368320  |
| 4             | 8             | 0           | -1.882417               | 0.476687  | -0.653100 |
| 5             | 6             | 0           | -1.019767               | 1.324715  | 0.187234  |
| 6             | 6             | 0           | 0.402176                | 0.835959  | 0.112642  |
| 7             | 6             | 0           | 1.140569                | 0.678674  | 1.290853  |
| 8             | 6             | 0           | 1.006210                | 0.563754  | -1.123077 |
| 9             | 6             | 0           | 2.469790                | 0.256073  | 1.244259  |
| 10            | 6             | 0           | 2.330750                | 0.133745  | -1.182602 |
| 11            | 6             | 0           | 3.049056                | -0.012990 | 0.005257  |
| 12            | 1             | 0           | 3.038410                | 0.133207  | 2.158828  |
| 13            | 1             | 0           | 2.794166                | -0.083637 | -2.138104 |
| 14            | 1             | 0           | -0.952518               | 2.848447  | -1.426058 |
| 15            | 1             | 0           | -1.395017               | 1.316297  | 1.213075  |
| 16            | 16            | 0           | -3.116679               | -0.362618 | -0.020916 |
| 17            | 8             | 0           | -3.383462               | 0.057405  | 1.348109  |
| 18            | 8             | 0           | -4.144508               | -0.432822 | -1.043597 |
| 19            | 6             | 0           | -2.323310               | -2.074109 | 0.071837  |
| 20            | 9             | 0           | -3.243801               | -2.940682 | 0.498495  |
| 21            | 9             | 0           | -1.885014               | -2.441177 | -1.132011 |
| 22            | 9             | 0           | -1.302394               | -2.045914 | 0.932075  |
| 23            | 1             | 0           | 0.681937                | 0.884419  | 2.253531  |
| 24            | 1             | 0           | 0.443577                | 0.667381  | -2.045837 |
| 25            | 35            | 0           | 4.859919                | -0.602615 | -0.069112 |

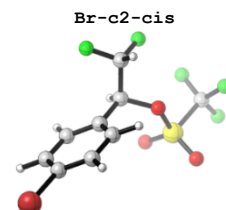

Standard orientation:

| Center Number | Atomic Number | Atomic Type | Coordinates (Angstroms) |           |           |
|---------------|---------------|-------------|-------------------------|-----------|-----------|
|               |               |             | X                       | Y         | Z         |
| 1             | 6             | 0           | -1.014042               | 2.347938  | -0.456660 |
| 2             | 9             | 0           | -2.332028               | 2.686513  | -0.280928 |
| 3             | 9             | 0           | -0.262824               | 3.289125  | 0.200880  |
| 4             | 8             | 0           | -1.591809               | 0.064725  | -0.581739 |
| 5             | 6             | 0           | -0.740349               | 0.983725  | 0.188319  |
| 6             | 6             | 0           | 0.706499                | 0.567272  | 0.116535  |
| 7             | 6             | 0           | 1.491467                | 0.606835  | 1.274272  |
| 8             | 6             | 0           | 1.285006                | 0.175049  | -1.098337 |
| 9             | 6             | 0           | 2.843680                | 0.265468  | 1.226642  |
| 10            | 6             | 0           | 2.633142                | -0.175318 | -1.157662 |
| 11            | 6             | 0           | 3.398521                | -0.122737 | 0.008124  |
| 12            | 1             | 0           | 3.448452                | 0.294255  | 2.125633  |
| 13            | 1             | 0           | 3.077795                | -0.486006 | -2.096075 |
| 14            | 1             | 0           | -0.784539               | 2.396082  | -1.523437 |
| 15            | 1             | 0           | -1.087289               | 1.020948  | 1.223450  |
| 16            | 16            | 0           | -2.315718               | -1.191763 | 0.145402  |
| 17            | 8             | 0           | -2.151998               | -2.351593 | -0.713286 |
| 18            | 8             | 0           | -2.003599               | -1.211788 | 1.568412  |
| 19            | 6             | 0           | -4.112576               | -0.635301 | -0.032654 |
| 20            | 9             | 0           | -4.895323               | -1.613495 | 0.428598  |
| 21            | 9             | 0           | -4.315265               | 0.473295  | 0.679456  |
| 22            | 9             | 0           | -4.391769               | -0.405267 | -1.315450 |
| 23            | 1             | 0           | 1.051055                | 0.902539  | 2.221831  |
| 24            | 1             | 0           | 0.684032                | 0.122215  | -2.000735 |
| 25            | 35            | 0           | 5.241943                | -0.604049 | -0.065390 |

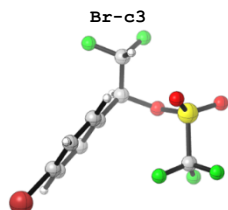

Standard orientation:

| Center Number | Atomic Number | Atomic Type | Coordinates (Angstroms) |           |           |
|---------------|---------------|-------------|-------------------------|-----------|-----------|
|               |               |             | X                       | Y         | Z         |
| 1             | 6             | 0           | -1.766537               | 2.547873  | -0.287485 |
| 2             | 9             | 0           | -3.040290               | 2.884306  | 0.094885  |
| 3             | 9             | 0           | -0.987275               | 3.671503  | -0.147839 |
| 4             | 8             | 0           | -2.193887               | 0.380551  | 0.835326  |
| 5             | 6             | 0           | -1.212834               | 1.494843  | 0.679313  |
| 6             | 6             | 0           | 0.196695                | 1.036515  | 0.416780  |
| 7             | 6             | 0           | 1.008609                | 0.745624  | 1.522946  |
| 8             | 6             | 0           | 0.726406                | 0.894251  | -0.873846 |
| 9             | 6             | 0           | 2.321208                | 0.309234  | 1.353401  |
| 10            | 6             | 0           | 2.040761                | 0.466011  | -1.057361 |
| 11            | 1             | 0           | 0.124556                | 1.103048  | -1.750329 |
| 12            | 6             | 0           | 2.823618                | 0.174243  | 0.059251  |
| 13            | 1             | 0           | 2.941665                | 0.086859  | 2.213713  |
| 14            | 1             | 0           | 2.445841                | 0.362847  | -2.057274 |
| 15            | 1             | 0           | -1.279021               | 1.930215  | 1.678503  |
| 16            | 16            | 0           | -2.696895               | -0.602409 | -0.342612 |
| 17            | 8             | 0           | -4.110329               | -0.851008 | -0.117839 |
| 18            | 8             | 0           | -2.177674               | -0.185171 | -1.640796 |
| 19            | 6             | 0           | -1.812879               | -2.201726 | 0.147416  |
| 20            | 9             | 0           | -2.097162               | -2.503786 | 1.414692  |
| 21            | 9             | 0           | -2.256323               | -3.172018 | -0.655879 |
| 22            | 9             | 0           | -0.494548               | -2.072603 | 0.003071  |
| 23            | 1             | 0           | -1.792300               | 2.269072  | -1.340457 |
| 24            | 1             | 0           | 0.615676                | 0.860919  | 2.529076  |
| 25            | 35            | 0           | 4.625118                | -0.394206 | -0.187081 |

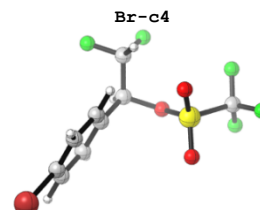

Standard orientation:

| Center Number | Atomic Number | Atomic Type | Coordinates (Angstroms) |           |           |
|---------------|---------------|-------------|-------------------------|-----------|-----------|
|               |               |             | X                       | Y         | Z         |
| 1             | 6             | 0           | -1.318143               | 2.378994  | -0.375303 |
| 2             | 9             | 0           | -2.568205               | 2.789339  | 0.014928  |
| 3             | 9             | 0           | -0.493721               | 3.477965  | -0.322211 |
| 4             | 8             | 0           | -1.792320               | 0.278254  | 0.813476  |
| 5             | 6             | 0           | -0.788320               | 1.362075  | 0.641787  |
| 6             | 6             | 0           | 0.612469                | 0.857984  | 0.405755  |
| 7             | 6             | 0           | 1.415327                | 0.592102  | 1.524442  |
| 8             | 6             | 0           | 1.140953                | 0.656107  | -0.877528 |
| 9             | 6             | 0           | 2.717339                | 0.119010  | 1.374263  |
| 10            | 6             | 0           | 2.445640                | 0.191621  | -1.041495 |
| 11            | 1             | 0           | 0.546596                | 0.847533  | -1.763716 |
| 12            | 6             | 0           | 3.219120                | -0.075876 | 0.087411  |
| 13            | 1             | 0           | 3.329757                | -0.088920 | 2.243898  |
| 14            | 1             | 0           | 2.849105                | 0.038850  | -2.035640 |
| 15            | 1             | 0           | -0.850843               | 1.839504  | 1.621622  |
| 16            | 16            | 0           | -1.991673               | -0.915803 | -0.261157 |
| 17            | 8             | 0           | -1.862934               | -0.414720 | -1.627093 |
| 18            | 8             | 0           | -1.303699               | -2.123360 | 0.168933  |
| 19            | 6             | 0           | -3.831217               | -1.163618 | 0.096327  |
| 20            | 9             | 0           | -4.247323               | -2.190518 | -0.649612 |
| 21            | 9             | 0           | -4.015103               | -1.443762 | 1.386003  |
| 22            | 9             | 0           | -4.513914               | -0.067904 | -0.231304 |
| 23            | 1             | 0           | -1.382352               | 2.036453  | -1.407592 |
| 24            | 1             | 0           | 1.022239                | 0.752728  | 2.524151  |
| 25            | 35            | 0           | 4.996836                | -0.722604 | -0.132598 |

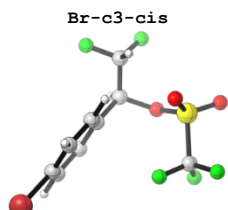

Standard orientation:

| Center Number | Atomic Number | Atomic Type | Coordinates (Angstroms) |           |           |
|---------------|---------------|-------------|-------------------------|-----------|-----------|
|               |               |             | X                       | Y         | Z         |
| 1             | 6             | 0           | -1.766323               | 2.548132  | -0.287494 |
| 2             | 9             | 0           | -3.040178               | 2.884549  | 0.094832  |
| 3             | 9             | 0           | -0.987055               | 3.671626  | -0.147460 |
| 4             | 8             | 0           | -2.193900               | 0.380618  | 0.835129  |
| 5             | 6             | 0           | -1.212848               | 1.494824  | 0.679159  |
| 6             | 6             | 0           | 0.196711                | 1.036504  | 0.416622  |
| 7             | 6             | 0           | 1.008617                | 0.745727  | 1.522825  |
| 8             | 6             | 0           | 0.726434                | 0.893984  | -0.873975 |
| 9             | 6             | 0           | 2.321232                | 0.309316  | 1.353359  |
| 10            | 6             | 0           | 2.040773                | 0.465702  | -1.057415 |
| 11            | 6             | 0           | 2.823646                | 0.174122  | 0.059247  |
| 12            | 1             | 0           | 2.941635                | 0.087049  | 2.213736  |
| 13            | 1             | 0           | 2.445889                | 0.362388  | -2.057298 |
| 14            | 1             | 0           | -1.278921               | 1.930190  | 1.678359  |
| 15            | 16            | 0           | -2.696817               | -0.602361 | -0.342787 |
| 16            | 8             | 0           | -4.110354               | -0.850718 | -0.118362 |
| 17            | 8             | 0           | -2.177149               | -0.185414 | -1.640874 |
| 18            | 6             | 0           | -1.813203               | -2.201743 | 0.147622  |
| 19            | 9             | 0           | -2.097839               | -2.503575 | 1.414894  |
| 20            | 9             | 0           | -2.256529               | -3.172090 | -0.655620 |
| 21            | 9             | 0           | -0.494785               | -2.072726 | 0.003588  |
| 22            | 1             | 0           | -1.792076               | 2.269593  | -1.340516 |
| 23            | 1             | 0           | 0.615730                | 0.861141  | 2.528953  |
| 24            | 1             | 0           | 0.124505                | 1.102484  | -1.750470 |
| 25            | 35            | 0           | 4.625165                | -0.394298 | -0.187061 |

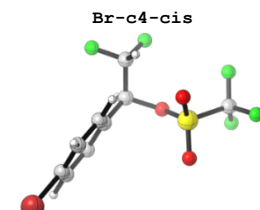

Standard orientation:

| Center Number | Atomic Number | Atomic Type | Coordinates (Angstroms) |           |           |
|---------------|---------------|-------------|-------------------------|-----------|-----------|
|               |               |             | X                       | Y         | Z         |
| 1             | 6             | 0           | -1.318129               | 2.379431  | -0.375059 |
| 2             | 9             | 0           | -2.567851               | 2.790368  | 0.015638  |
| 3             | 9             | 0           | -0.493211               | 3.478003  | -0.322643 |
| 4             | 8             | 0           | -1.792765               | 0.278702  | 0.813275  |
| 5             | 6             | 0           | -0.788382               | 1.362402  | 0.641942  |
| 6             | 6             | 0           | 0.612268                | 0.858102  | 0.405867  |
| 7             | 6             | 0           | 1.414984                | 0.591709  | 1.524532  |
| 8             | 6             | 0           | 1.140823                | 0.656521  | -0.877439 |
| 9             | 6             | 0           | 2.716928                | 0.118455  | 1.374312  |
| 10            | 6             | 0           | 2.445447                | 0.191880  | -1.041453 |
| 11            | 6             | 0           | 3.218773                | -0.076146 | 0.087438  |
| 12            | 1             | 0           | 3.329255                | -0.089788 | 2.243937  |
| 13            | 1             | 0           | 2.848976                | 0.039427  | -2.035620 |
| 14            | 1             | 0           | -0.850885               | 1.839595  | 1.621891  |
| 15            | 16            | 0           | -1.991472               | -0.915640 | -0.261174 |
| 16            | 8             | 0           | -1.862775               | -0.414722 | -1.627172 |
| 17            | 8             | 0           | -1.302978               | -2.122818 | 0.169168  |
| 18            | 6             | 0           | -3.830981               | -1.164087 | 0.096168  |
| 19            | 9             | 0           | -4.246638               | -2.191266 | -0.649635 |
| 20            | 9             | 0           | -4.014960               | -1.444057 | 1.385848  |
| 21            | 9             | 0           | -4.514027               | -0.068661 | -0.231774 |
| 22            | 1             | 0           | -1.382966               | 2.036591  | -1.407231 |
| 23            | 1             | 0           | 1.021825                | 0.752090  | 2.524255  |
| 24            | 1             | 0           | 0.546585                | 0.848339  | -1.763617 |
| 25            | 35            | 0           | 4.996534                | -0.722697 | -0.132622 |

### 5.4.3. Optimized Coordinate of Conformers of 1-(2-Fluorophenyl)-2,2-difluoroethanol Triflate (4-F)

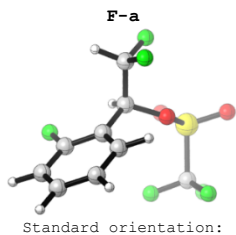

| Center Number | Atomic Number | Atomic Type | Coordinates (Angstroms) |           |           |
|---------------|---------------|-------------|-------------------------|-----------|-----------|
|               |               |             | X                       | Y         | Z         |
| 1             | 6             | 0           | 0.858959                | 2.456276  | 0.026579  |
| 2             | 9             | 0           | 1.110787                | 2.673424  | -1.304080 |
| 3             | 9             | 0           | -0.216050               | 3.240888  | 0.363690  |
| 4             | 8             | 0           | -0.635605               | 0.665342  | -0.548811 |
| 5             | 6             | 0           | 0.522395                | 0.986169  | 0.291776  |
| 6             | 6             | 0           | 1.654341                | 0.042096  | -0.029013 |
| 7             | 6             | 0           | 2.421435                | -0.507515 | 0.999651  |
| 8             | 6             | 0           | 1.988223                | -0.311821 | -1.345718 |
| 9             | 6             | 0           | 3.480460                | -1.376662 | 0.775209  |
| 10            | 6             | 0           | 3.044643                | -1.185268 | -1.601994 |
| 11            | 1             | 0           | 1.407615                | 0.095258  | -2.166266 |
| 12            | 6             | 0           | 3.790454                | -1.715451 | -0.543278 |
| 13            | 1             | 0           | 4.037569                | -1.772448 | 1.617113  |
| 14            | 1             | 0           | 3.286359                | -1.450950 | -2.625716 |
| 15            | 1             | 0           | 4.614401                | -2.393670 | -0.740950 |
| 16            | 1             | 0           | 1.726045                | 2.786797  | 0.603968  |
| 17            | 1             | 0           | 0.237394                | 0.909655  | 1.342846  |
| 18            | 16            | 0           | -2.081569               | 0.336677  | 0.107843  |
| 19            | 8             | 0           | -2.072972               | 0.597113  | 1.541096  |
| 20            | 8             | 0           | -3.090651               | 0.870898  | -0.788144 |
| 21            | 6             | 0           | -2.093469               | -1.538069 | -0.113226 |
| 22            | 9             | 0           | -3.247550               | -2.009706 | 0.362827  |
| 23            | 9             | 0           | -1.980971               | -1.847164 | -1.404709 |
| 24            | 9             | 0           | -1.076511               | -2.074553 | 0.566590  |
| 25            | 9             | 0           | 2.119728                | -0.174758 | 2.287957  |

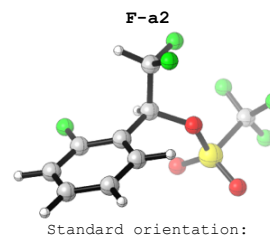

| Center Number | Atomic Number | Atomic Type | Coordinates (Angstroms) |           |           |
|---------------|---------------|-------------|-------------------------|-----------|-----------|
|               |               |             | X                       | Y         | Z         |
| 1             | 6             | 0           | 0.526288                | 2.171442  | -0.131907 |
| 2             | 9             | 0           | 0.731069                | 2.360526  | -1.474736 |
| 3             | 9             | 0           | -0.701544               | 2.706444  | 0.166685  |
| 4             | 8             | 0           | -0.496553               | 0.071777  | -0.606791 |
| 5             | 6             | 0           | 0.544417                | 0.681039  | 0.219819  |
| 6             | 6             | 0           | 1.884104                | 0.031196  | -0.038957 |
| 7             | 6             | 0           | 2.818399                | -0.071777 | 0.992631  |
| 8             | 6             | 0           | 2.250562                | -0.468129 | -1.297041 |
| 9             | 6             | 0           | 4.071216                | -0.645194 | 0.828128  |
| 10            | 6             | 0           | 3.502603                | -1.051674 | -1.493086 |
| 11            | 1             | 0           | 1.542168                | -0.407786 | -2.115955 |
| 12            | 6             | 0           | 4.411310                | -1.139276 | -0.433104 |
| 13            | 1             | 0           | 4.751564                | -0.700149 | 1.670745  |
| 14            | 1             | 0           | 3.767618                | -1.438348 | -2.471484 |
| 15            | 1             | 0           | 5.385562                | -1.593038 | -0.584094 |
| 16            | 1             | 0           | 1.290434                | 2.725504  | 0.418796  |
| 17            | 1             | 0           | 0.274427                | 0.590891  | 1.273972  |
| 18            | 16            | 0           | -1.434808               | -1.110007 | -0.009324 |
| 19            | 8             | 0           | -1.597534               | -2.103080 | -1.056118 |
| 20            | 8             | 0           | -1.032281               | -1.450162 | 1.349099  |
| 21            | 6             | 0           | -3.070134               | -0.170505 | 0.105775  |
| 22            | 9             | 0           | -4.015140               | -1.034289 | 0.485254  |
| 23            | 9             | 0           | -2.966183               | 0.803634  | 1.010122  |
| 24            | 9             | 0           | -3.384933               | 0.345826  | -1.080914 |
| 25            | 9             | 0           | 2.483789                | 0.419196  | 2.221824  |

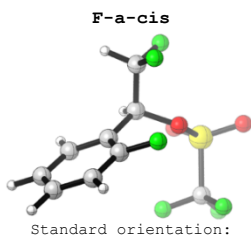

| Center Number | Atomic Number | Atomic Type | Coordinates (Angstroms) |           |           |
|---------------|---------------|-------------|-------------------------|-----------|-----------|
|               |               |             | X                       | Y         | Z         |
| 1             | 6             | 0           | -0.898097               | 2.437599  | -0.329837 |
| 2             | 9             | 0           | -1.296392               | 2.683774  | 0.954486  |
| 3             | 9             | 0           | 0.205802                | 3.222056  | -0.566672 |
| 4             | 8             | 0           | 0.567668                | 0.658095  | 0.382285  |
| 5             | 6             | 0           | -0.522384               | 0.967478  | -0.547467 |
| 6             | 6             | 0           | -1.664775               | -0.005530 | -0.390260 |
| 7             | 6             | 0           | -2.253657               | -0.554530 | -1.541040 |
| 8             | 6             | 0           | -2.199642               | -0.386725 | 0.845602  |
| 9             | 6             | 0           | -3.334903               | -1.432003 | -1.454351 |
| 10            | 6             | 0           | -3.267952               | -1.266553 | 0.960463  |
| 11            | 6             | 0           | -3.840662               | -1.788510 | -0.201334 |
| 12            | 1             | 0           | -3.771483               | -1.841500 | -2.359069 |
| 13            | 1             | 0           | -3.634175               | -1.528539 | 1.947072  |
| 14            | 1             | 0           | -4.676905               | -2.475884 | -0.123036 |
| 15            | 1             | 0           | -1.696229               | 2.750145  | -1.008384 |
| 16            | 1             | 0           | -0.138140               | 0.905840  | -1.568621 |
| 17            | 16            | 0           | 2.060311                | 0.341722  | -0.163675 |
| 18            | 8             | 0           | 2.138244                | 0.537196  | -1.606343 |
| 19            | 8             | 0           | 3.001834                | 0.940302  | 0.764480  |
| 20            | 6             | 0           | 2.100476                | -1.520207 | 0.143780  |
| 21            | 9             | 0           | 3.291430                | -1.982972 | -0.243355 |
| 22            | 9             | 0           | 1.919147                | -1.775585 | 1.438307  |
| 23            | 9             | 0           | 1.138226                | -2.111901 | -0.569724 |
| 24            | 1             | 0           | -1.852439               | -0.289955 | -2.515432 |
| 25            | 9             | 0           | -1.654656               | 0.100349  | 1.988018  |

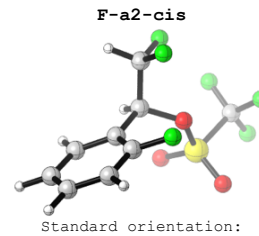

| Center Number | Atomic Number | Atomic Type | Coordinates (Angstroms) |           |           |
|---------------|---------------|-------------|-------------------------|-----------|-----------|
|               |               |             | X                       | Y         | Z         |
| 1             | 6             | 0           | -0.527929               | 2.150216  | -0.523399 |
| 2             | 9             | 0           | -0.813260               | 2.609002  | 0.732736  |
| 3             | 9             | 0           | 0.732509                | 2.597205  | -0.838621 |
| 4             | 8             | 0           | 0.424045                | 0.136460  | 0.370029  |
| 5             | 6             | 0           | -0.560129               | 0.620655  | -0.600690 |
| 6             | 6             | 0           | -1.925163               | 0.015453  | -0.376078 |
| 7             | 6             | 0           | -2.650714               | -0.452135 | -1.483618 |
| 8             | 6             | 0           | -2.534585               | -0.091622 | 0.879429  |
| 9             | 6             | 0           | -3.930954               | -0.987303 | -1.339342 |
| 10            | 6             | 0           | -3.802577               | -0.631339 | 1.052273  |
| 11            | 6             | 0           | -4.505776               | -1.077474 | -0.068740 |
| 12            | 1             | 0           | -4.469743               | -1.340651 | -2.212070 |
| 13            | 1             | 0           | -4.218851               | -0.694660 | 2.051681  |
| 14            | 1             | 0           | -5.497864               | -1.499660 | 0.055426  |
| 15            | 1             | 0           | -1.237984               | 2.593912  | -1.226165 |
| 16            | 1             | 0           | -0.220080               | 0.358019  | -1.605606 |
| 17            | 16            | 0           | 1.401565                | -1.101059 | -0.003803 |
| 18            | 8             | 0           | 1.389333                | -2.035258 | 1.108202  |
| 19            | 8             | 0           | 1.194421                | -1.522631 | -1.384683 |
| 20            | 6             | 0           | 3.059047                | -0.197115 | 0.067671  |
| 21            | 9             | 0           | 4.027132                | -1.103323 | -0.096036 |
| 22            | 9             | 0           | 3.124416                | 0.705743  | -0.910702 |
| 23            | 9             | 0           | 3.202722                | 0.402772  | 1.247983  |
| 24            | 1             | 0           | -2.197868               | -0.398491 | -2.469648 |
| 25            | 9             | 0           | -1.870448               | 0.330141  | 1.983954  |

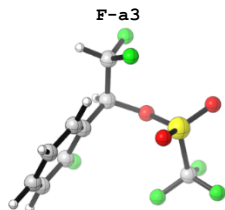

Standard orientation:

| Center Number | Atomic Number | Atomic Type | Coordinates (Angstroms) |           |           |
|---------------|---------------|-------------|-------------------------|-----------|-----------|
|               |               |             | X                       | Y         | Z         |
| 1             | 6             | 0           | 0.769346                | 2.557768  | 0.414751  |
| 2             | 9             | 0           | 0.285653                | 2.756906  | -0.855998 |
| 3             | 9             | 0           | -0.006498               | 3.316003  | 1.253890  |
| 4             | 8             | 0           | -0.744905               | 0.661952  | 0.767714  |
| 5             | 6             | 0           | 0.671896                | 1.089957  | 0.825733  |
| 6             | 6             | 0           | 1.663213                | 0.157071  | 0.179137  |
| 7             | 6             | 0           | 2.072906                | -0.976624 | 0.890009  |
| 8             | 6             | 0           | 2.252234                | 0.370585  | -1.077753 |
| 9             | 6             | 0           | 3.009083                | -1.881016 | 0.411493  |
| 10            | 6             | 0           | 3.201993                | -0.517233 | -1.582493 |
| 11            | 1             | 0           | 1.956349                | 1.227155  | -1.671557 |
| 12            | 6             | 0           | 3.577439                | -1.642157 | -0.841627 |
| 13            | 1             | 0           | 3.280579                | -2.741787 | 1.012393  |
| 14            | 1             | 0           | 3.642663                | -0.333878 | -2.556655 |
| 15            | 1             | 0           | 4.312916                | -2.336118 | -1.235936 |
| 16            | 1             | 0           | 0.825792                | 1.071277  | 1.906382  |
| 17            | 16            | 0           | -1.597197               | 0.272105  | -0.555164 |
| 18            | 8             | 0           | -2.777021               | 1.120454  | -0.604839 |
| 19            | 8             | 0           | -0.760615               | 0.043965  | -1.723531 |
| 20            | 6             | 0           | -2.174372               | -1.416895 | 0.059199  |
| 21            | 9             | 0           | -2.833555               | -1.292579 | 1.211253  |
| 22            | 9             | 0           | -2.987768               | -1.934009 | -0.866808 |
| 23            | 9             | 0           | -1.124369               | -2.223804 | 0.227445  |
| 24            | 1             | 0           | 1.795360                | 2.930465  | 0.461317  |
| 25            | 9             | 0           | 1.526468                | -1.203684 | 2.117022  |

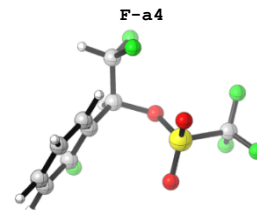

Standard orientation:

| Center Number | Atomic Number | Atomic Type | Coordinates (Angstroms) |           |           |
|---------------|---------------|-------------|-------------------------|-----------|-----------|
|               |               |             | X                       | Y         | Z         |
| 1             | 6             | 0           | 0.531029                | 2.485906  | 0.147260  |
| 2             | 9             | 0           | 0.086087                | 2.489992  | -1.149195 |
| 3             | 9             | 0           | -0.397872               | 3.178953  | 0.885000  |
| 4             | 8             | 0           | -0.682430               | 0.441932  | 0.637585  |
| 5             | 6             | 0           | 0.658464                | 1.069191  | 0.705757  |
| 6             | 6             | 0           | 1.796414                | 0.254640  | 0.144660  |
| 7             | 6             | 0           | 2.496080                | -0.604800 | 1.000707  |
| 8             | 6             | 0           | 2.231207                | 0.323642  | -1.190439 |
| 9             | 6             | 0           | 3.573105                | -1.375900 | 0.591618  |
| 10            | 6             | 0           | 3.312695                | -0.440282 | -1.629109 |
| 11            | 1             | 0           | 1.713241                | 0.967888  | -1.890524 |
| 12            | 6             | 0           | 3.981298                | -1.288196 | -0.741142 |
| 13            | 1             | 0           | 4.069846                | -2.024995 | 1.303983  |
| 14            | 1             | 0           | 3.629737                | -0.374916 | -2.664431 |
| 15            | 1             | 0           | 4.821151                | -1.884799 | -1.082694 |
| 16            | 1             | 0           | 0.797064                | 1.179102  | 1.782576  |
| 17            | 16            | 0           | -1.102809               | -0.731036 | -0.396245 |
| 18            | 8             | 0           | -0.984178               | -0.315777 | -1.787552 |
| 19            | 8             | 0           | -0.591865               | -2.023159 | 0.043888  |
| 20            | 6             | 0           | -2.931860               | -0.650145 | 0.074422  |
| 21            | 9             | 0           | -3.564819               | -1.576183 | -0.652965 |
| 22            | 9             | 0           | -3.092387               | -0.916496 | 1.370383  |
| 23            | 9             | 0           | -3.429914               | 0.553045  | -0.206670 |
| 24            | 1             | 0           | 1.480184                | 3.026202  | 0.194521  |
| 25            | 9             | 0           | 2.100118                | -0.691556 | 2.299815  |

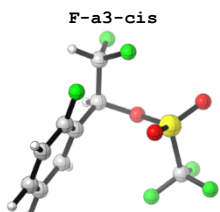

Standard orientation:

| Center Number | Atomic Number | Atomic Type | Coordinates (Angstroms) |           |           |
|---------------|---------------|-------------|-------------------------|-----------|-----------|
|               |               |             | X                       | Y         | Z         |
| 1             | 6             | 0           | 0.985021                | 2.378344  | 0.519800  |
| 2             | 9             | 0           | 0.365062                | 2.649006  | -0.668665 |
| 3             | 9             | 0           | 0.460934                | 3.258444  | 1.441123  |
| 4             | 8             | 0           | -0.759851               | 0.686828  | 0.844920  |
| 5             | 6             | 0           | 0.690098                | 0.949922  | 0.998320  |
| 6             | 6             | 0           | 1.590255                | -0.171681 | 0.535361  |
| 7             | 6             | 0           | 1.681034                | -1.313382 | 1.352313  |
| 8             | 6             | 0           | 2.365494                | -0.166612 | -0.627307 |
| 9             | 6             | 0           | 2.487214                | -2.395206 | 1.006285  |
| 10            | 6             | 0           | 3.186944                | -1.224894 | -0.993545 |
| 11            | 6             | 0           | 3.242043                | -2.349903 | -0.170413 |
| 12            | 1             | 0           | 2.533079                | -3.264127 | 1.654112  |
| 13            | 1             | 0           | 3.762551                | -1.155371 | -1.909900 |
| 14            | 1             | 0           | 3.878009                | -3.184827 | -0.446667 |
| 15            | 1             | 0           | 0.754503                | 0.991967  | 2.087433  |
| 16            | 16            | 0           | -1.520346               | 0.320688  | -0.542432 |
| 17            | 8             | 0           | -2.569591               | 1.299654  | -0.774328 |
| 18            | 8             | 0           | -0.599273               | -0.093922 | -1.589515 |
| 19            | 6             | 0           | -2.381039               | -1.232013 | 0.100041  |
| 20            | 9             | 0           | -3.156990               | -0.932764 | 1.143165  |
| 21            | 9             | 0           | -3.133447               | -1.722514 | -0.889391 |
| 22            | 9             | 0           | -1.476518               | -2.144118 | 0.463040  |
| 23            | 1             | 0           | 2.052008                | 2.584942  | 0.422501  |
| 24            | 1             | 0           | 1.100984                | -1.347517 | 2.270252  |
| 25            | 9             | 0           | 2.340040                | 0.920389  | -1.441780 |

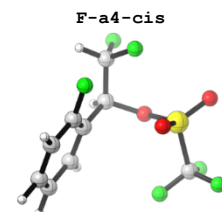

Standard orientation:

| Center Number | Atomic Number | Atomic Type | Coordinates (Angstroms) |           |           |
|---------------|---------------|-------------|-------------------------|-----------|-----------|
|               |               |             | X                       | Y         | Z         |
| 1             | 6             | 0           | 0.985326                | 2.378262  | 0.519719  |
| 2             | 9             | 0           | 0.365068                | 2.649150  | -0.668613 |
| 3             | 9             | 0           | 0.461704                | 3.258451  | 1.441178  |
| 4             | 8             | 0           | -0.759770               | 0.686844  | 0.845053  |
| 5             | 6             | 0           | 0.690123                | 0.949836  | 0.998305  |
| 6             | 6             | 0           | 1.590248                | -0.171850 | 0.535358  |
| 7             | 6             | 0           | 1.680724                | -1.313617 | 1.352230  |
| 8             | 6             | 0           | 2.365641                | -0.166862 | -0.627225 |
| 9             | 6             | 0           | 2.486822                | -2.395538 | 1.006265  |
| 10            | 6             | 0           | 3.187014                | -1.225200 | -0.993400 |
| 11            | 6             | 0           | 3.241849                | -2.350257 | -0.170286 |
| 12            | 1             | 0           | 2.532449                | -3.264537 | 1.654007  |
| 13            | 1             | 0           | 3.762759                | -1.155748 | -1.909669 |
| 14            | 1             | 0           | 3.877765                | -3.185248 | -0.446454 |
| 15            | 1             | 0           | 0.754659                | 0.992012  | 2.087410  |
| 16            | 16            | 0           | -1.520063               | 0.320618  | -0.542540 |
| 17            | 8             | 0           | -2.568810               | 1.299957  | -0.775019 |
| 18            | 8             | 0           | -0.598698               | -0.094686 | -1.589065 |
| 19            | 6             | 0           | -2.381572               | -1.231562 | 0.100054  |
| 20            | 9             | 0           | -3.134072               | -1.721789 | -0.889434 |
| 21            | 9             | 0           | -1.477545               | -2.144061 | 0.463308  |
| 22            | 9             | 0           | -3.157509               | -0.931818 | 1.143063  |
| 23            | 1             | 0           | 2.052327                | 2.584600  | 0.422046  |
| 24            | 1             | 0           | 1.100461                | -1.347755 | 2.270032  |
| 25            | 9             | 0           | 2.340325                | 0.920134  | -1.441790 |

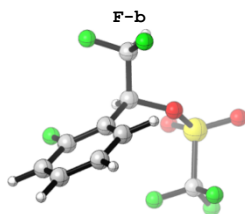

Standard orientation:

| Center Number | Atomic Number | Atomic Type | Coordinates (Angstroms) |           |           |
|---------------|---------------|-------------|-------------------------|-----------|-----------|
|               |               |             | X                       | Y         | Z         |
| 1             | 6             | 0           | 1.062830                | 2.410040  | -0.110091 |
| 2             | 9             | 0           | 2.186361                | 2.634496  | 0.645001  |
| 3             | 9             | 0           | 1.431039                | 2.497385  | -1.427474 |
| 4             | 8             | 0           | -0.686812               | 0.874739  | -0.588941 |
| 5             | 6             | 0           | 0.532152                | 1.009466  | 0.224794  |
| 6             | 6             | 0           | 1.481894                | -0.118930 | -0.079445 |
| 7             | 6             | 0           | 2.161299                | -0.760061 | 0.958026  |
| 8             | 6             | 0           | 1.728187                | -0.564860 | -1.387568 |
| 9             | 6             | 0           | 3.055589                | -1.801100 | 0.749222  |
| 10            | 6             | 0           | 2.618251                | -1.611141 | -1.627630 |
| 11            | 1             | 0           | 1.209540                | -0.092337 | -2.214353 |
| 12            | 6             | 0           | 3.282740                | -2.226457 | -0.560983 |
| 13            | 1             | 0           | 3.552158                | -2.259632 | 1.597161  |
| 14            | 1             | 0           | 2.793958                | -1.945121 | -2.644803 |
| 15            | 1             | 0           | 3.977576                | -3.039482 | -0.745888 |
| 16            | 1             | 0           | 0.335764                | 3.198700  | 0.095137  |
| 17            | 1             | 0           | 0.258662                | 1.018927  | 1.281459  |
| 18            | 16            | 0           | -2.135596               | 0.642399  | 0.101790  |
| 19            | 8             | 0           | -2.086776               | 0.962554  | 1.522513  |
| 20            | 8             | 0           | -3.118923               | 1.209296  | -0.803097 |
| 21            | 6             | 0           | -2.280621               | -1.235969 | -0.042177 |
| 22            | 9             | 0           | -3.467452               | -1.601733 | 0.444537  |
| 23            | 9             | 0           | -2.186162               | -1.601618 | -1.319730 |
| 24            | 9             | 0           | -1.307864               | -1.815900 | 0.665055  |
| 25            | 9             | 0           | 1.936083                | -0.350195 | 2.238607  |

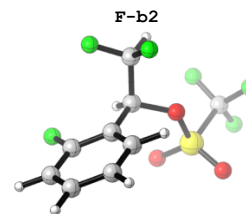

Standard orientation:

| Center Number | Atomic Number | Atomic Type | Coordinates (Angstroms) |           |           |
|---------------|---------------|-------------|-------------------------|-----------|-----------|
|               |               |             | X                       | Y         | Z         |
| 1             | 6             | 0           | 0.511072                | 2.172343  | -0.208289 |
| 2             | 9             | 0           | 1.478379                | 2.794459  | 0.539035  |
| 3             | 9             | 0           | 0.851606                | 2.324331  | -1.527151 |
| 4             | 8             | 0           | -0.617934               | 0.140450  | -0.617502 |
| 5             | 6             | 0           | 0.482566                | 0.689457  | 0.186425  |
| 6             | 6             | 0           | 1.764194                | -0.059765 | -0.073690 |
| 7             | 6             | 0           | 2.642899                | -0.329336 | 0.977231  |
| 8             | 6             | 0           | 2.128319                | -0.506336 | -1.353221 |
| 9             | 6             | 0           | 3.840508                | -1.010258 | 0.807685  |
| 10            | 6             | 0           | 3.324274                | -1.195261 | -1.553525 |
| 11            | 1             | 0           | 1.460566                | -0.322140 | -2.187532 |
| 12            | 6             | 0           | 4.179778                | -1.445080 | -0.475022 |
| 13            | 1             | 0           | 4.479863                | -1.191561 | 1.664529  |
| 14            | 1             | 0           | 3.587244                | -1.537845 | -2.548786 |
| 15            | 1             | 0           | 5.110943                | -1.981132 | -0.628531 |
| 16            | 1             | 0           | -0.442768               | 2.677120  | -0.040802 |
| 17            | 1             | 0           | 0.217525                | 0.640236  | 1.244111  |
| 18            | 16            | 0           | -1.590825               | -1.004457 | 0.001449  |
| 19            | 8             | 0           | -1.789494               | -2.017330 | -1.019294 |
| 20            | 8             | 0           | -1.204960               | -1.323436 | 1.369347  |
| 21            | 6             | 0           | -3.181838               | 0.009277  | 0.086726  |
| 22            | 9             | 0           | -4.146090               | -0.762171 | 0.590004  |
| 23            | 9             | 0           | -2.992740               | 1.066537  | 0.882416  |
| 24            | 9             | 0           | -3.525909               | 0.423042  | -1.131914 |
| 25            | 9             | 0           | 2.311234                | 0.091459  | 2.230667  |

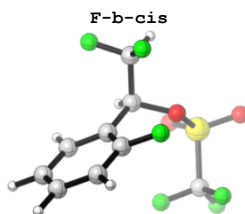

Standard orientation:

| Center Number | Atomic Number | Atomic Type | Coordinates (Angstroms) |           |           |
|---------------|---------------|-------------|-------------------------|-----------|-----------|
|               |               |             | X                       | Y         | Z         |
| 1             | 6             | 0           | -1.134796               | 2.391829  | -0.043843 |
| 2             | 9             | 0           | -2.116832               | 2.692009  | -0.958700 |
| 3             | 9             | 0           | -1.722218               | 2.380727  | 1.189756  |
| 4             | 8             | 0           | 0.618003                | 0.851159  | 0.459690  |
| 5             | 6             | 0           | -0.551974               | 1.020099  | -0.415851 |
| 6             | 6             | 0           | -1.502201               | -0.144340 | -0.307487 |
| 7             | 6             | 0           | -2.072301               | -0.666150 | -1.479572 |
| 8             | 6             | 0           | -1.882316               | -0.731099 | 0.904724  |
| 9             | 6             | 0           | -2.987650               | -1.717933 | -1.434620 |
| 10            | 6             | 0           | -2.781676               | -1.786538 | 0.976971  |
| 11            | 6             | 0           | -3.340628               | -2.278947 | -0.204399 |
| 12            | 1             | 0           | -3.415770               | -2.100240 | -2.355155 |
| 13            | 1             | 0           | -3.031307               | -2.204203 | 1.946199  |
| 14            | 1             | 0           | -4.046550               | -3.102126 | -0.159526 |
| 15            | 1             | 0           | -0.383395               | 3.184486  | -0.063385 |
| 16            | 1             | 0           | -0.201933               | 1.111994  | -1.446743 |
| 17            | 16            | 0           | 2.103687                | 0.662405  | -0.160106 |
| 18            | 8             | 0           | 2.111226                | 0.966741  | -1.586107 |
| 19            | 8             | 0           | 3.030770                | 1.267601  | 0.778795  |
| 20            | 6             | 0           | 2.300184                | -1.208449 | 0.009821  |
| 21            | 9             | 0           | 3.515457                | -1.540643 | -0.430353 |
| 22            | 9             | 0           | 2.170230                | -1.566100 | 1.285740  |
| 23            | 9             | 0           | 1.373345                | -1.825031 | -0.727496 |
| 24            | 1             | 0           | -1.793067               | -0.236056 | -2.436992 |
| 25            | 9             | 0           | -1.347405               | -0.275092 | 2.065920  |

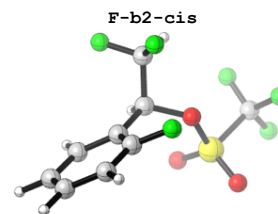

Standard orientation:

| Center Number | Atomic Number | Atomic Type | Coordinates (Angstroms) |           |           |
|---------------|---------------|-------------|-------------------------|-----------|-----------|
|               |               |             | X                       | Y         | Z         |
| 1             | 6             | 0           | -0.519098               | 2.163965  | -0.133268 |
| 2             | 9             | 0           | -1.348701               | 2.784282  | -1.037275 |
| 3             | 9             | 0           | -1.023257               | 2.410367  | 1.112532  |
| 4             | 8             | 0           | 0.541760                | 0.101692  | 0.397018  |
| 5             | 6             | 0           | -0.506626               | 0.665014  | -0.465274 |
| 6             | 6             | 0           | -1.819912               | -0.056776 | -0.303286 |
| 7             | 6             | 0           | -2.563219               | -0.380758 | -1.449455 |
| 8             | 6             | 0           | -2.364117               | -0.415897 | 0.935178  |
| 9             | 6             | 0           | -3.798421               | -1.022168 | -1.355518 |
| 10            | 6             | 0           | -3.585748               | -1.064900 | 1.056181  |
| 11            | 6             | 0           | -4.308547               | -1.364953 | -0.100472 |
| 12            | 1             | 0           | -4.353065               | -1.259820 | -2.257014 |
| 13            | 1             | 0           | -3.952081               | -1.323829 | 2.043543  |
| 14            | 1             | 0           | -5.265120               | -1.870898 | -0.016909 |
| 15            | 1             | 0           | 0.472659                | 2.616697  | -0.200559 |
| 16            | 1             | 0           | -0.179186               | 0.586452  | -1.504846 |
| 17            | 16            | 0           | 1.583206                | -0.993643 | -0.193446 |
| 18            | 8             | 0           | 1.639874                | -2.116052 | 0.725674  |
| 19            | 8             | 0           | 1.393127                | -1.162311 | -1.629159 |
| 20            | 6             | 0           | 3.171133                | -0.002158 | 0.052124  |
| 21            | 9             | 0           | 4.194372                | -0.732803 | -0.393581 |
| 22            | 9             | 0           | 3.098789                | 1.136564  | -0.644270 |
| 23            | 9             | 0           | 3.343145                | 0.273066  | 1.343660  |
| 24            | 1             | 0           | -2.161976               | -0.125426 | -2.425798 |
| 25            | 9             | 0           | -1.678048               | -0.142556 | 2.073512  |

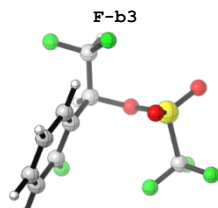

Standard orientation:

| Center Number | Atomic Number | Atomic Type | Coordinates (Angstroms) |           |           |
|---------------|---------------|-------------|-------------------------|-----------|-----------|
|               |               |             | X                       | Y         | Z         |
| 1             | 6             | 0           | 1.090810                | 2.399061  | 0.643810  |
| 2             | 9             | 0           | 2.434564                | 2.599016  | 0.832919  |
| 3             | 9             | 0           | 0.795321                | 2.760000  | -0.648389 |
| 4             | 8             | 0           | -0.711065               | 0.792839  | 0.879634  |
| 5             | 6             | 0           | 0.769905                | 0.927667  | 0.919865  |
| 6             | 6             | 0           | 1.545457                | -0.125105 | 0.173670  |
| 7             | 6             | 0           | 1.743063                | -1.362652 | 0.797015  |
| 8             | 6             | 0           | 2.132008                | 0.052854  | -1.090166 |
| 9             | 6             | 0           | 2.468906                | -2.398954 | 0.229296  |
| 10            | 6             | 0           | 2.872687                | -0.968393 | -1.683893 |
| 11            | 1             | 0           | 2.003467                | 0.991780  | -1.613036 |
| 12            | 6             | 0           | 3.038757                | -2.192558 | -1.028689 |
| 13            | 1             | 0           | 2.580409                | -3.334186 | 0.766523  |
| 14            | 1             | 0           | 3.316314                | -0.808756 | -2.660929 |
| 15            | 1             | 0           | 3.611945                | -2.988552 | -1.493324 |
| 16            | 1             | 0           | 0.931915                | 0.786893  | 1.990287  |
| 17            | 16            | 0           | -1.648781               | 0.647752  | -0.435447 |
| 18            | 8             | 0           | -2.691397               | 1.658059  | -0.346984 |
| 19            | 8             | 0           | -0.888455               | 0.426920  | -1.655278 |
| 20            | 6             | 0           | -2.449593               | -0.995164 | 0.038271  |
| 21            | 9             | 0           | -3.070064               | -0.884098 | 1.213158  |
| 22            | 9             | 0           | -3.338702               | -1.309072 | -0.908159 |
| 23            | 9             | 0           | -1.520353               | -1.950105 | 0.109910  |
| 24            | 1             | 0           | 0.540181                | 3.066550  | 1.309746  |
| 25            | 9             | 0           | 1.193856                | -1.562502 | 2.028765  |

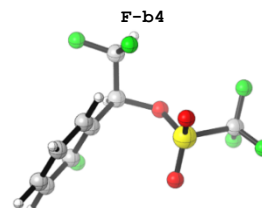

Standard orientation:

| Center Number | Atomic Number | Atomic Type | Coordinates (Angstroms) |           |           |
|---------------|---------------|-------------|-------------------------|-----------|-----------|
|               |               |             | X                       | Y         | Z         |
| 1             | 6             | 0           | 0.620739                | 2.411434  | 0.395188  |
| 2             | 9             | 0           | 1.855832                | 2.962353  | 0.634994  |
| 3             | 9             | 0           | 0.344489                | 2.580343  | -0.936822 |
| 4             | 8             | 0           | -0.737947               | 0.455821  | 0.712422  |
| 5             | 6             | 0           | 0.666985                | 0.935932  | 0.804015  |
| 6             | 6             | 0           | 1.705769                | 0.061892  | 0.152122  |
| 7             | 6             | 0           | 2.346736                | -0.906857 | 0.934649  |
| 8             | 6             | 0           | 2.102129                | 0.161381  | -1.193400 |
| 9             | 6             | 0           | 3.330311                | -1.753531 | 0.447275  |
| 10            | 6             | 0           | 3.088971                | -0.677572 | -1.710144 |
| 11            | 1             | 0           | 1.632170                | 0.893221  | -1.837590 |
| 12            | 6             | 0           | 3.701121                | -1.633045 | -0.893525 |
| 13            | 1             | 0           | 3.784689                | -2.484164 | 1.106995  |
| 14            | 1             | 0           | 3.377840                | -0.584809 | -2.751635 |
| 15            | 1             | 0           | 4.467607                | -2.287038 | -1.296960 |
| 16            | 1             | 0           | 0.826568                | 0.928274  | 1.882881  |
| 17            | 16            | 0           | -1.297493               | -0.559072 | -0.419587 |
| 18            | 8             | 0           | -1.176399               | -0.008284 | -1.762771 |
| 19            | 8             | 0           | -0.905018               | -1.932435 | -0.133043 |
| 20            | 6             | 0           | -3.097397               | -0.356834 | 0.121911  |
| 21            | 9             | 0           | -3.833995               | -1.148254 | -0.663191 |
| 22            | 9             | 0           | -3.248253               | -0.725443 | 1.393778  |
| 23            | 9             | 0           | -3.487432               | 0.908945  | -0.030958 |
| 24            | 1             | 0           | -0.126188               | 2.968328  | 0.964874  |
| 25            | 9             | 0           | 1.987128                | -1.029752 | 2.242578  |

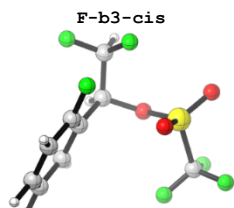

Standard orientation:

| Center Number | Atomic Number | Atomic Type | Coordinates (Angstroms) |           |           |
|---------------|---------------|-------------|-------------------------|-----------|-----------|
|               |               |             | X                       | Y         | Z         |
| 1             | 6             | 0           | -1.068271               | 2.256550  | -0.834127 |
| 2             | 9             | 0           | -2.426798               | 2.412085  | -0.938449 |
| 3             | 9             | 0           | -0.682363               | 2.662302  | 0.414218  |
| 4             | 8             | 0           | 0.759330                | 0.665555  | -0.954474 |
| 5             | 6             | 0           | -0.712730               | 0.788464  | -1.113029 |
| 6             | 6             | 0           | -1.519755               | -0.341598 | -0.519051 |
| 7             | 6             | 0           | -1.610937               | -1.519775 | -1.284297 |
| 8             | 6             | 0           | -2.197488               | -0.334096 | 0.704919  |
| 9             | 6             | 0           | -2.321776               | -2.631899 | -0.839831 |
| 10            | 6             | 0           | -2.923408               | -1.425149 | 1.167991  |
| 11            | 6             | 0           | -2.981618               | -2.582511 | 0.391903  |
| 12            | 1             | 0           | -2.368183               | -3.525206 | -1.453554 |
| 13            | 1             | 0           | -3.427662               | -1.351929 | 2.125262  |
| 14            | 1             | 0           | -3.545816               | -3.438715 | 0.747766  |
| 15            | 1             | 0           | -0.780321               | 0.685383  | -2.198026 |
| 16            | 16            | 0           | 1.576213                | 0.536324  | 0.443100  |
| 17            | 8             | 0           | 2.465255                | 1.680045  | 0.574852  |
| 18            | 8             | 0           | 0.741165                | 0.075670  | 1.540785  |
| 19            | 6             | 0           | 2.649773                | -0.917974 | -0.102550 |
| 20            | 9             | 0           | 3.341902                | -0.597962 | -1.197363 |
| 21            | 9             | 0           | 3.495443                | -1.198674 | 0.893034  |
| 22            | 9             | 0           | 1.886610                | -1.983952 | -0.351189 |
| 23            | 1             | 0           | -0.588446               | 2.920461  | -1.556764 |
| 24            | 1             | 0           | -1.107188               | -1.557194 | -2.246198 |
| 25            | 9             | 0           | -2.171519               | 0.768841  | 1.487643  |

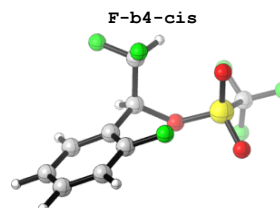

Standard orientation:

| Center Number | Atomic Number | Atomic Type | Coordinates (Angstroms) |           |           |
|---------------|---------------|-------------|-------------------------|-----------|-----------|
|               |               |             | X                       | Y         | Z         |
| 1             | 6             | 0           | 0.406028                | 1.917469  | -0.545918 |
| 2             | 9             | 0           | 1.137254                | 3.013906  | -0.133843 |
| 3             | 9             | 0           | 0.913021                | 1.549197  | -1.756312 |
| 4             | 8             | 0           | -0.512576               | -0.104896 | 0.705614  |
| 5             | 6             | 0           | 0.613337                | 0.842495  | 0.542540  |
| 6             | 6             | 0           | 1.929526                | 0.112872  | 0.485332  |
| 7             | 6             | 0           | 2.932105                | 0.434057  | 1.413231  |
| 8             | 6             | 0           | 2.223857                | -0.878498 | -0.454594 |
| 9             | 6             | 0           | 4.174136                | -0.201646 | 1.383547  |
| 10            | 6             | 0           | 3.443057                | -1.537857 | -0.500695 |
| 11            | 6             | 0           | 4.427534                | -1.188629 | 0.427246  |
| 12            | 1             | 0           | 4.934917                | 0.066658  | 2.108808  |
| 13            | 1             | 0           | 3.606558                | -2.304219 | -1.250283 |
| 14            | 1             | 0           | 5.387808                | -1.693765 | 0.402630  |
| 15            | 1             | 0           | 0.557867                | 1.390179  | 1.484596  |
| 16            | 16            | 0           | -1.580005               | -0.660501 | -0.372885 |
| 17            | 8             | 0           | -1.552933               | 0.092556  | -1.618534 |
| 18            | 8             | 0           | -1.568417               | -2.112245 | -0.338901 |
| 19            | 6             | 0           | -3.122772               | -0.115107 | 0.567848  |
| 20            | 9             | 0           | -4.194022               | -0.486303 | -0.137138 |
| 21            | 9             | 0           | -3.160587               | -0.685311 | 1.771858  |
| 22            | 9             | 0           | -3.119186               | 1.215558  | 0.702974  |
| 23            | 1             | 0           | -0.631113               | 2.226936  | -0.675019 |
| 24            | 1             | 0           | 2.732172                | 1.194144  | 2.162708  |
| 25            | 9             | 0           | 1.268234                | -1.232177 | -1.354641 |

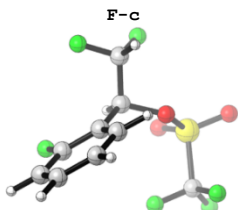

Standard orientation:

| Center Number | Atomic Number | Atomic Type | Coordinates (Angstroms) |           |           |
|---------------|---------------|-------------|-------------------------|-----------|-----------|
|               |               |             | X                       | Y         | Z         |
| 1             | 6             | 0           | 0.941035                | 2.352749  | -0.500053 |
| 2             | 9             | 0           | -0.061196               | 3.251512  | -0.236472 |
| 3             | 9             | 0           | 2.058106                | 2.777722  | 0.173963  |
| 4             | 8             | 0           | -0.652605               | 0.596201  | -0.717809 |
| 5             | 6             | 0           | 0.548410                | 0.973595  | 0.042598  |
| 6             | 6             | 0           | 1.613888                | -0.068591 | -0.166300 |
| 7             | 6             | 0           | 2.320593                | -0.589470 | 0.919020  |
| 8             | 6             | 0           | 1.949150                | -0.541384 | -1.445192 |
| 9             | 6             | 0           | 3.323700                | -1.539639 | 0.782021  |
| 10            | 6             | 0           | 2.950108                | -1.497544 | -1.613383 |
| 11            | 1             | 0           | 1.408399                | -0.169175 | -2.309963 |
| 12            | 6             | 0           | 3.637506                | -1.994031 | -0.500292 |
| 13            | 1             | 0           | 3.837191                | -1.907476 | 1.663379  |
| 14            | 1             | 0           | 3.192470                | -1.855066 | -2.608542 |
| 15            | 1             | 0           | 4.418445                | -2.736899 | -0.627448 |
| 16            | 1             | 0           | 1.147349                | 2.371885  | -1.572443 |
| 17            | 1             | 0           | 0.292485                | 1.084222  | 1.097709  |
| 18            | 16            | 0           | -2.099384               | 0.454995  | 0.004156  |
| 19            | 8             | 0           | -2.042027               | 0.922649  | 1.382044  |
| 20            | 8             | 0           | -3.096262               | 0.911839  | -0.947175 |
| 21            | 6             | 0           | -2.220637               | -1.428614 | 0.059631  |
| 22            | 9             | 0           | -3.374355               | -1.757817 | 0.643342  |
| 23            | 9             | 0           | -2.186337               | -1.923354 | -1.177536 |
| 24            | 9             | 0           | -1.202731               | -1.922913 | 0.768749  |
| 25            | 9             | 0           | 2.015230                | -0.149077 | 2.170846  |

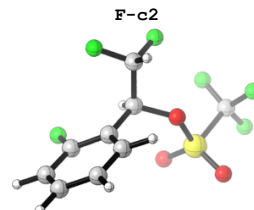

Standard orientation:

| Center Number | Atomic Number | Atomic Type | Coordinates (Angstroms) |           |           |
|---------------|---------------|-------------|-------------------------|-----------|-----------|
|               |               |             | X                       | Y         | Z         |
| 1             | 6             | 0           | 0.526409                | 2.071240  | -0.695260 |
| 2             | 9             | 0           | -0.670626               | 2.701761  | -0.472740 |
| 3             | 9             | 0           | 1.503878                | 2.834704  | -0.109529 |
| 4             | 8             | 0           | -0.543186               | -0.031086 | -0.718847 |
| 5             | 6             | 0           | 0.522081                | 0.696186  | -0.016095 |
| 6             | 6             | 0           | 1.836814                | -0.028057 | -0.153637 |
| 7             | 6             | 0           | 2.707397                | -0.130625 | 0.932714  |
| 8             | 6             | 0           | 2.245778                | -0.598689 | -1.369060 |
| 9             | 6             | 0           | 3.938209                | -0.768330 | 0.856677  |
| 10            | 6             | 0           | 3.476772                | -1.245727 | -1.475202 |
| 11            | 1             | 0           | 1.583879                | -0.551612 | -2.228269 |
| 12            | 6             | 0           | 4.321917                | -1.328667 | -0.363320 |
| 13            | 1             | 0           | 4.570088                | -0.819762 | 1.736423  |
| 14            | 1             | 0           | 3.774239                | -1.686268 | -2.420904 |
| 15            | 1             | 0           | 5.280284                | -1.831911 | -0.441914 |
| 16            | 1             | 0           | 0.704450                | 2.036138  | -1.772255 |
| 17            | 1             | 0           | 0.249909                | 0.829132  | 1.032246  |
| 18            | 16            | 0           | -1.476803               | -1.096175 | 0.074728  |
| 19            | 8             | 0           | -1.682634               | -2.230673 | -0.808121 |
| 20            | 8             | 0           | -1.037511               | -1.236087 | 1.456219  |
| 21            | 6             | 0           | -3.094593               | -0.120310 | 0.092171  |
| 22            | 9             | 0           | -4.028782               | -0.877793 | 0.671352  |
| 23            | 9             | 0           | -2.934123               | 1.004721  | 0.789407  |
| 24            | 9             | 0           | -3.463202               | 0.170353  | -1.155125 |
| 25            | 9             | 0           | 2.335962                | 0.417780  | 2.122312  |

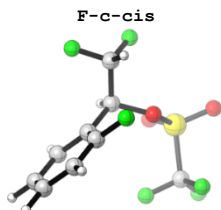

Standard orientation:

| Center Number | Atomic Number | Atomic Type | Coordinates (Angstroms) |           |           |
|---------------|---------------|-------------|-------------------------|-----------|-----------|
|               |               |             | X                       | Y         | Z         |
| 1             | 6             | 0           | -1.047857               | 2.353315  | 0.149621  |
| 2             | 9             | 0           | -0.054336               | 3.275102  | -0.068268 |
| 3             | 9             | 0           | -2.127327               | 2.731582  | -0.610864 |
| 4             | 8             | 0           | 0.574750                | 0.647028  | 0.517307  |
| 5             | 6             | 0           | -0.573129               | 0.982294  | -0.347072 |
| 6             | 6             | 0           | -1.604938               | -0.109674 | -0.282327 |
| 7             | 6             | 0           | -1.986848               | -0.789832 | -1.448146 |
| 8             | 6             | 0           | -2.223233               | -0.490347 | 0.912555  |
| 9             | 6             | 0           | -2.945945               | -1.802987 | -1.408719 |
| 10            | 6             | 0           | -3.174549               | -1.496199 | 0.985461  |
| 11            | 6             | 0           | -3.536484               | -2.156404 | -0.192290 |
| 12            | 1             | 0           | -3.227312               | -2.315227 | -2.322612 |
| 13            | 1             | 0           | -3.615962               | -1.747806 | 1.943464  |
| 14            | 1             | 0           | -4.280197               | -2.945902 | -0.154169 |
| 15            | 1             | 0           | -1.325932               | 2.386471  | 1.203006  |
| 16            | 1             | 0           | -0.218478               | 1.108301  | -1.372401 |
| 17            | 16            | 0           | 2.066191                | 0.475606  | -0.092486 |
| 18            | 8             | 0           | 2.085822                | 0.791292  | -1.515219 |
| 19            | 8             | 0           | 2.997098                | 1.059247  | 0.856555  |
| 20            | 6             | 0           | 2.233747                | -1.398041 | 0.066661  |
| 21            | 9             | 0           | 3.438873                | -1.750496 | -0.386245 |
| 22            | 9             | 0           | 2.110306                | -1.759867 | 1.343104  |
| 23            | 9             | 0           | 1.289393                | -1.997535 | -0.662756 |
| 24            | 1             | 0           | -1.524640               | -0.517893 | -2.392456 |
| 25            | 9             | 0           | -1.876075               | 0.155556  | 2.061844  |

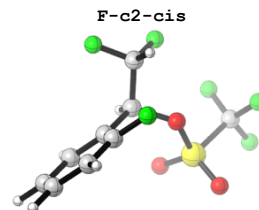

Standard orientation:

| Center Number | Atomic Number | Atomic Type | Coordinates (Angstroms) |           |           |
|---------------|---------------|-------------|-------------------------|-----------|-----------|
|               |               |             | X                       | Y         | Z         |
| 1             | 6             | 0           | -0.547443               | 2.157172  | 0.061215  |
| 2             | 9             | 0           | 0.674523                | 2.713789  | -0.222452 |
| 3             | 9             | 0           | -1.481936               | 2.824661  | -0.691276 |
| 4             | 8             | 0           | 0.457994                | 0.057366  | 0.498336  |
| 5             | 6             | 0           | -0.544871               | 0.688878  | -0.381011 |
| 6             | 6             | 0           | -1.872936               | -0.009728 | -0.272458 |
| 7             | 6             | 0           | -2.464466               | -0.579721 | -1.409413 |
| 8             | 6             | 0           | -2.566369               | -0.124892 | 0.936187  |
| 9             | 6             | 0           | -3.695292               | -1.232724 | -1.329017 |
| 10            | 6             | 0           | -3.786912               | -0.772223 | 1.049636  |
| 11            | 6             | 0           | -4.353581               | -1.330082 | -0.100018 |
| 12            | 1             | 0           | -4.134730               | -1.666709 | -2.220802 |
| 13            | 1             | 0           | -4.273838               | -0.831689 | 2.016689  |
| 14            | 1             | 0           | -5.308741               | -1.840585 | -0.029993 |
| 15            | 1             | 0           | -0.763071               | 2.315591  | 1.117924  |
| 16            | 1             | 0           | -0.187805               | 0.651571  | -1.412237 |
| 17            | 16            | 0           | 1.451856                | -1.087680 | -0.072758 |
| 18            | 8             | 0           | 1.496455                | -2.162050 | 0.903746  |
| 19            | 8             | 0           | 1.207665                | -1.322539 | -1.490631 |
| 20            | 6             | 0           | 3.092122                | -0.160708 | 0.071281  |
| 21            | 9             | 0           | 4.072718                | -1.007621 | -0.252566 |
| 22            | 9             | 0           | 3.102525                | 0.875408  | -0.767395 |
| 23            | 9             | 0           | 3.265438                | 0.268229  | 1.321132  |
| 24            | 1             | 0           | -1.948821               | -0.510642 | -2.362520 |
| 25            | 9             | 0           | -2.018947               | 0.424123  | 2.057563  |

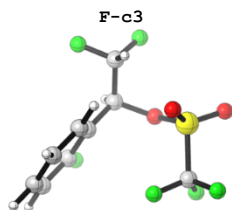

Standard orientation:

| Center Number | Atomic Number | Atomic Type | Coordinates (Angstroms) |           |           |
|---------------|---------------|-------------|-------------------------|-----------|-----------|
|               |               |             | X                       | Y         | Z         |
| 1             | 6             | 0           | 0.745317                | 2.457984  | -0.272258 |
| 2             | 9             | 0           | -0.018903               | 3.417400  | 0.340956  |
| 3             | 9             | 0           | 2.048308                | 2.893852  | -0.246405 |
| 4             | 8             | 0           | -0.735659               | 0.818492  | 0.846014  |
| 5             | 6             | 0           | 0.683437                | 1.168077  | 0.554410  |
| 6             | 6             | 0           | 1.505461                | 0.023131  | 0.029461  |
| 7             | 6             | 0           | 2.102828                | -0.852193 | 0.943712  |
| 8             | 6             | 0           | 1.740373                | -0.220213 | -1.333984 |
| 9             | 6             | 0           | 2.893913                | -1.926729 | 0.566188  |
| 10            | 6             | 0           | 2.533316                | -1.291462 | -1.744674 |
| 11            | 1             | 0           | 1.293921                | 0.422438  | -2.083475 |
| 12            | 6             | 0           | 3.107344                | -2.144163 | -0.796846 |
| 13            | 1             | 0           | 3.326763                | -2.568065 | 1.325794  |
| 14            | 1             | 0           | 2.700314                | -1.460543 | -2.803074 |
| 15            | 1             | 0           | 3.723034                | -2.979495 | -1.114739 |
| 16            | 1             | 0           | 1.013994                | 1.429941  | 1.560683  |
| 17            | 16            | 0           | -1.849473               | 0.439037  | -0.261258 |
| 18            | 8             | 0           | -3.099685               | 1.046479  | 0.160388  |
| 19            | 8             | 0           | -1.325673               | 0.596367  | -1.613774 |
| 20            | 6             | 0           | -2.039335               | -1.411834 | 0.076885  |
| 21            | 9             | 0           | -2.346303               | -1.605521 | 1.359240  |
| 22            | 9             | 0           | -3.028782               | -1.867122 | -0.695852 |
| 23            | 9             | 0           | -0.911660               | -2.059182 | -0.217095 |
| 24            | 1             | 0           | 0.422314                | 2.381763  | -1.310022 |
| 25            | 9             | 0           | 1.897723                | -0.641307 | 2.273220  |

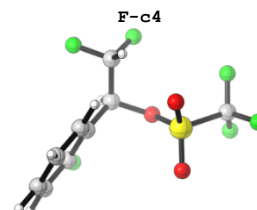

Standard orientation:

| Center Number | Atomic Number | Atomic Type | Coordinates (Angstroms) |           |           |
|---------------|---------------|-------------|-------------------------|-----------|-----------|
|               |               |             | X                       | Y         | Z         |
| 1             | 6             | 0           | 0.347112                | 2.207522  | -0.364239 |
| 2             | 9             | 0           | -0.688353               | 2.911825  | 0.195408  |
| 3             | 9             | 0           | 1.458245                | 3.016124  | -0.326890 |
| 4             | 8             | 0           | -0.609934               | 0.219928  | 0.731721  |
| 5             | 6             | 0           | 0.644014                | 0.985048  | 0.512051  |
| 6             | 6             | 0           | 1.800009                | 0.130616  | 0.064574  |
| 7             | 6             | 0           | 2.589494                | -0.501815 | 1.031695  |
| 8             | 6             | 0           | 2.148876                | -0.073864 | -1.280801 |
| 9             | 6             | 0           | 3.675709                | -1.305622 | 0.720511  |
| 10            | 6             | 0           | 3.237056                | -0.875770 | -1.624324 |
| 11            | 1             | 0           | 1.563784                | 0.386540  | -2.068947 |
| 12            | 6             | 0           | 3.997623                | -1.491453 | -0.625780 |
| 13            | 1             | 0           | 4.246566                | -1.768766 | 1.517523  |
| 14            | 1             | 0           | 3.487998                | -1.020793 | -2.669576 |
| 15            | 1             | 0           | 4.843083                | -2.118005 | -0.891248 |
| 16            | 1             | 0           | 0.822936                | 1.358690  | 1.521271  |
| 17            | 16            | 0           | -1.258587               | -0.742924 | -0.397610 |
| 18            | 8             | 0           | -1.129393               | -0.149412 | -0.726095 |
| 19            | 8             | 0           | -0.912075               | -2.135023 | -0.155869 |
| 20            | 6             | 0           | -3.043821               | -0.502119 | 0.175890  |
| 21            | 9             | 0           | -3.813890               | -1.281943 | -0.588052 |
| 22            | 9             | 0           | -3.170248               | -0.860654 | 1.452560  |
| 23            | 9             | 0           | -3.406732               | 0.770107  | 0.023352  |
| 24            | 1             | 0           | 0.094133                | 2.005097  | -1.404247 |
| 25            | 9             | 0           | 2.278054                | -0.319368 | 2.343784  |

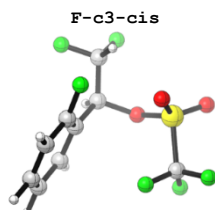

Standard orientation:

| Center Number | Atomic Number | Atomic Type | Coordinates (Angstroms) |           |           |
|---------------|---------------|-------------|-------------------------|-----------|-----------|
|               |               |             | X                       | Y         | Z         |
| 1             | 6             | 0           | -1.061346               | 2.321362  | -0.064517 |
| 2             | 9             | 0           | -0.405628               | 3.369453  | -0.663237 |
| 3             | 9             | 0           | -2.408439               | 2.551414  | -0.209082 |
| 4             | 8             | 0           | 0.742100                | 0.873603  | -0.932850 |
| 5             | 6             | 0           | -0.736129               | 1.039660  | -0.842336 |
| 6             | 6             | 0           | -1.466552               | -0.223603 | -0.465591 |
| 7             | 6             | 0           | -1.651503               | -1.193712 | -1.467904 |
| 8             | 6             | 0           | -1.988232               | -0.516450 | 0.798417  |
| 9             | 6             | 0           | -2.299426               | -2.398310 | -1.206706 |
| 10            | 6             | 0           | -2.644606               | -1.706130 | 1.087212  |
| 11            | 6             | 0           | -2.795232               | -2.655142 | 0.075898  |
| 12            | 1             | 0           | -2.424180               | -3.128263 | -1.999348 |
| 13            | 1             | 0           | -3.027136               | -1.869268 | 2.088664  |
| 14            | 1             | 0           | -3.306599               | -3.588226 | 0.289716  |
| 15            | 1             | 0           | -0.950539               | 1.264865  | -1.889449 |
| 16            | 16            | 0           | 1.737138                | 0.587831  | 0.310942  |
| 17            | 8             | 0           | 2.939384                | 1.370968  | 0.081056  |
| 18            | 8             | 0           | 1.022472                | 0.607043  | 1.580451  |
| 19            | 6             | 0           | 2.216338                | -1.205286 | -0.049784 |
| 20            | 9             | 0           | 2.680332                | -1.310672 | -1.295758 |
| 21            | 9             | 0           | 3.172659                | -1.551761 | 0.815494  |
| 22            | 9             | 0           | 1.164147                | -2.008867 | 0.106274  |
| 23            | 1             | 0           | -0.813187               | 2.319825  | 0.994510  |
| 24            | 1             | 0           | -1.271269               | -0.991983 | -2.465329 |
| 25            | 9             | 0           | -1.877829               | 0.394935  | 1.800616  |

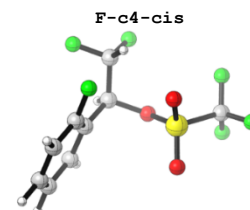

Standard orientation:

| Center Number | Atomic Number | Atomic Type | Coordinates (Angstroms) |           |           |
|---------------|---------------|-------------|-------------------------|-----------|-----------|
|               |               |             | X                       | Y         | Z         |
| 1             | 6             | 0           | -0.426002               | 2.190905  | -0.008818 |
| 2             | 9             | 0           | 0.591349                | 2.914037  | -0.584364 |
| 3             | 9             | 0           | -1.573689               | 2.935902  | -0.138245 |
| 4             | 8             | 0           | 0.673315                | 0.175924  | -0.878736 |
| 5             | 6             | 0           | -0.619186               | 0.906422  | -0.824794 |
| 6             | 6             | 0           | -1.792284               | 0.017986  | -0.491238 |
| 7             | 6             | 0           | -2.310707               | -0.797253 | -1.514431 |
| 8             | 6             | 0           | -2.409520               | -0.072160 | 0.760574  |
| 9             | 6             | 0           | -3.374407               | -1.665729 | -1.284748 |
| 10            | 6             | 0           | -3.476567               | -0.923525 | 1.017375  |
| 11            | 6             | 0           | -3.957896               | -1.728792 | -0.014759 |
| 12            | 1             | 0           | -3.750353               | -2.284979 | -2.092079 |
| 13            | 1             | 0           | -3.910508               | -0.942951 | 2.010882  |
| 14            | 1             | 0           | -4.790413               | -2.399069 | 0.173501  |
| 15            | 1             | 0           | -0.701784               | 1.221413  | -1.867433 |
| 16            | 16            | 0           | 1.218443                | -0.755584 | 0.331154  |
| 17            | 8             | 0           | 0.936208                | -0.151058 | 1.628373  |
| 18            | 8             | 0           | 0.932375                | -2.158616 | 0.071113  |
| 19            | 6             | 0           | 3.046956                | -0.478164 | -0.058775 |
| 20            | 9             | 0           | 3.752594                | -1.224706 | 0.795210  |
| 21            | 9             | 0           | 3.315718                | -0.854565 | -1.308711 |
| 22            | 9             | 0           | 3.361034                | 0.805798  | 0.105196  |
| 23            | 1             | 0           | -0.199865               | 2.061634  | 1.046852  |
| 24            | 1             | 0           | -1.861023               | -0.745837 | -2.501880 |
| 25            | 9             | 0           | -1.969076               | 0.706977  | 1.784623  |



## 5.4.4. Optimized Coordinate of Phenols and $\alpha,\alpha$ -Difluorotoluenes

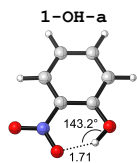

Standard orientation:

| Center Number | Atomic Number | Atomic Type | Coordinates (Angstroms) |           |           |
|---------------|---------------|-------------|-------------------------|-----------|-----------|
|               |               |             | X                       | Y         | Z         |
| 1             | 6             | 0           | 0.426635                | 0.996142  | -0.000028 |
| 2             | 6             | 0           | -0.217943               | -0.268823 | -0.000011 |
| 3             | 6             | 0           | 2.557592                | -0.163533 | -0.000002 |
| 4             | 6             | 0           | 0.527134                | -1.463328 | 0.000005  |
| 5             | 6             | 0           | 1.908859                | -1.413855 | 0.000003  |
| 6             | 1             | 0           | 3.642345                | -0.119638 | 0.000019  |
| 7             | 1             | 0           | -0.005665               | -2.405915 | 0.000012  |
| 8             | 1             | 0           | 2.485469                | -2.331982 | 0.000014  |
| 9             | 6             | 0           | 1.832415                | 1.018202  | -0.000007 |
| 10            | 1             | 0           | 2.323966                | 1.984954  | -0.000011 |
| 11            | 8             | 0           | -0.218291               | 2.171394  | 0.000020  |
| 12            | 1             | 0           | -1.184551               | 1.976217  | 0.000070  |
| 13            | 7             | 0           | -1.654932               | -0.363184 | 0.000027  |
| 14            | 8             | 0           | -2.192389               | -1.470189 | -0.000004 |
| 15            | 8             | 0           | -2.324970               | 0.700022  | -0.000022 |

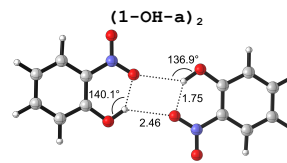

Standard orientation:

| Center Number | Atomic Number | Atomic Type | Coordinates (Angstroms) |           |           |
|---------------|---------------|-------------|-------------------------|-----------|-----------|
|               |               |             | X                       | Y         | Z         |
| 1             | 6             | 0           | -3.234185               | -0.891175 | 0.002319  |
| 2             | 6             | 0           | -3.396113               | 0.519938  | -0.008855 |
| 3             | 6             | 0           | -4.673765               | 1.105494  | 0.079473  |
| 4             | 6             | 0           | -5.796076               | 0.304469  | 0.177736  |
| 5             | 6             | 0           | -5.647238               | -1.096167 | 0.188604  |
| 6             | 6             | 0           | -4.393956               | -1.681746 | 0.102851  |
| 7             | 7             | 0           | -2.256793               | 1.394448  | -0.109491 |
| 8             | 8             | 0           | -2.059348               | -1.529292 | -0.074747 |
| 9             | 8             | 0           | -1.116829               | 0.876333  | -0.193313 |
| 10            | 8             | 0           | -2.422101               | 2.614434  | -0.111806 |
| 11            | 1             | 0           | -1.338986               | -0.862835 | -0.140599 |
| 12            | 1             | 0           | -4.748951               | 2.185560  | 0.067974  |
| 13            | 1             | 0           | -6.780488               | 0.753710  | 0.245636  |
| 14            | 1             | 0           | -6.524684               | -1.730908 | 0.265284  |
| 15            | 1             | 0           | -4.270514               | -2.759238 | 0.110896  |
| 16            | 6             | 0           | 3.234659                | 0.891258  | 0.002545  |
| 17            | 6             | 0           | 3.395969                | -0.519925 | -0.008783 |
| 18            | 6             | 0           | 4.673378                | -1.106049 | 0.079278  |
| 19            | 6             | 0           | 5.796051                | -0.305519 | 0.177440  |
| 20            | 6             | 0           | 5.647825                | 1.095180  | 0.188467  |
| 21            | 6             | 0           | 4.394785                | 1.681317  | 0.102969  |
| 22            | 7             | 0           | 2.256245                | -1.393914 | -0.109319 |
| 23            | 8             | 0           | 2.060073                | 1.529863  | -0.074302 |
| 24            | 8             | 0           | 1.116488                | -0.875265 | -0.192789 |
| 25            | 8             | 0           | 2.420997                | -2.613970 | -0.111880 |
| 26            | 1             | 0           | 1.339469                | 0.863654  | -0.140113 |
| 27            | 1             | 0           | 4.748093                | -2.186147 | 0.067665  |
| 28            | 1             | 0           | 6.780280                | -0.755194 | 0.245143  |
| 29            | 1             | 0           | 6.525559                | 1.729531  | 0.265070  |
| 30            | 1             | 0           | 4.271817                | 2.758863  | 0.111129  |

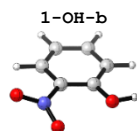

Standard orientation:

| Center Number | Atomic Number | Atomic Type | Coordinates (Angstroms) |           |           |
|---------------|---------------|-------------|-------------------------|-----------|-----------|
|               |               |             | X                       | Y         | Z         |
| 1             | 6             | 0           | -0.456065               | 0.981808  | -0.044582 |
| 2             | 6             | 0           | 0.241575                | -0.245361 | 0.013809  |
| 3             | 6             | 0           | -2.540655               | -0.272530 | 0.028659  |
| 4             | 6             | 0           | -0.450795               | -1.463698 | 0.067692  |
| 5             | 6             | 0           | -1.838077               | -1.483997 | 0.085133  |
| 6             | 1             | 0           | -3.626111               | -0.270216 | 0.037013  |
| 7             | 1             | 0           | 0.125028                | -2.379926 | 0.105051  |
| 8             | 1             | 0           | -2.367340               | -2.428486 | 0.142781  |
| 9             | 6             | 0           | -1.859929               | 0.937910  | -0.041099 |
| 10            | 1             | 0           | -2.411228               | 1.872709  | -0.095728 |
| 11            | 8             | 0           | 0.210473                | 2.154782  | -0.135273 |
| 12            | 1             | 0           | -0.422102               | 2.882075  | -0.233486 |
| 13            | 7             | 0           | 1.699392                | -0.306709 | 0.016241  |
| 14            | 8             | 0           | 2.229612                | -1.369908 | -0.334620 |
| 15            | 8             | 0           | 2.338627                | 0.683377  | 0.379019  |

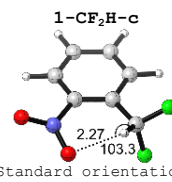

Standard orientation:

| Center Number | Atomic Number | Atomic Type | Coordinates (Angstroms) |           |           |
|---------------|---------------|-------------|-------------------------|-----------|-----------|
|               |               |             | X                       | Y         | Z         |
| 1             | 6             | 0           | -0.453191               | 0.395541  | -0.073297 |
| 2             | 6             | 0           | -0.580380               | 1.787537  | -0.007157 |
| 3             | 6             | 0           | 1.977488                | 0.679948  | 0.079041  |
| 4             | 6             | 0           | 0.537747                | 2.613791  | 0.118191  |
| 5             | 1             | 0           | -1.570218               | 2.224362  | -0.065023 |
| 6             | 6             | 0           | 1.819272                | 2.060854  | 0.159518  |
| 7             | 1             | 0           | 2.958963                | 0.224060  | 0.106562  |
| 8             | 1             | 0           | 0.404449                | 3.689008  | 0.177619  |
| 9             | 1             | 0           | 2.692485                | 2.697380  | 0.253799  |
| 10            | 6             | 0           | -1.715422               | -0.431495 | -0.209044 |
| 11            | 1             | 0           | -1.604857               | -1.368333 | -0.748378 |
| 12            | 9             | 0           | -2.685625               | 0.310007  | -0.855065 |
| 13            | 9             | 0           | -2.228078               | -0.712355 | 1.042587  |
| 14            | 6             | 0           | 0.849379                | -0.136987 | -0.022975 |
| 15            | 7             | 0           | 1.094072                | -1.586898 | -0.065322 |
| 16            | 8             | 0           | 2.210073                | -1.975710 | -0.413873 |
| 17            | 8             | 0           | 0.174257                | -2.343314 | 0.261288  |

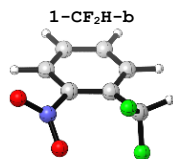

Standard orientation:

| Center Number | Atomic Number | Atomic Type | Coordinates (Angstroms) |           |           |
|---------------|---------------|-------------|-------------------------|-----------|-----------|
|               |               |             | X                       | Y         | Z         |
| 1             | 6             | 0           | 0.196519                | -0.779350 | 0.078052  |
| 2             | 6             | 0           | 1.324128                | -1.606321 | 0.109677  |
| 3             | 6             | 0           | 1.698749                | 1.144266  | -0.107408 |
| 4             | 6             | 0           | 2.616246                | -1.084953 | 0.003350  |
| 5             | 1             | 0           | 1.187461                | -2.677078 | 0.226904  |
| 6             | 6             | 0           | 2.804044                | 0.292703  | -0.103296 |
| 7             | 1             | 0           | 1.819199                | 2.218482  | -0.179588 |
| 8             | 1             | 0           | 3.469360                | -1.755038 | 0.019089  |
| 9             | 1             | 0           | 3.802724                | 0.709591  | -0.177735 |
| 10            | 6             | 0           | -1.142922               | -1.457960 | 0.241726  |
| 11            | 1             | 0           | -1.030177               | -2.468176 | 0.640976  |
| 12            | 9             | 0           | -1.813950               | -1.569092 | -0.956701 |
| 13            | 9             | 0           | -1.962692               | -0.764317 | 1.104355  |
| 14            | 6             | 0           | 0.416093                | 0.604988  | -0.035412 |
| 15            | 7             | 0           | -0.696041               | 1.570114  | -0.103444 |
| 16            | 8             | 0           | -1.676398               | 1.276868  | -0.783559 |
| 17            | 8             | 0           | -0.556559               | 2.635866  | 0.501778  |

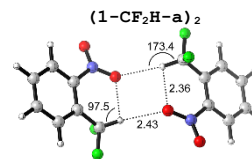

Standard orientation:

| Center Number | Atomic Number | Atomic Type | Coordinates (Angstroms) |           |           |
|---------------|---------------|-------------|-------------------------|-----------|-----------|
|               |               |             | X                       | Y         | Z         |
| 1             | 6             | 0           | 3.255536                | -0.645629 | 0.094955  |
| 2             | 1             | 0           | 1.133597                | -1.255882 | 0.212683  |
| 3             | 7             | 0           | 2.198915                | 1.545465  | 0.745876  |
| 4             | 9             | 0           | 2.033459                | -1.325222 | 2.010087  |
| 5             | 8             | 0           | 1.076863                | 1.031195  | 0.772841  |
| 6             | 6             | 0           | 4.350655                | -1.290736 | -0.486581 |
| 7             | 1             | 0           | 4.341778                | -2.370811 | -0.560139 |
| 8             | 8             | 0           | 2.438079                | 2.685622  | 1.145003  |
| 9             | 9             | 0           | 2.360174                | -2.819202 | 0.421997  |
| 10            | 6             | 0           | 5.448915                | -0.571337 | -0.966869 |
| 11            | 1             | 0           | 6.279503                | -1.104539 | -1.417798 |
| 12            | 6             | 0           | 5.479148                | 0.819069  | -0.864149 |
| 13            | 1             | 0           | 6.327635                | 1.383414  | -1.235774 |
| 14            | 6             | 0           | 4.405882                | 1.488715  | -0.280170 |
| 15            | 1             | 0           | 4.399997                | 2.567321  | -0.187710 |
| 16            | 6             | 0           | 3.308869                | 0.760676  | 0.181957  |
| 17            | 6             | 0           | 2.109517                | -1.480691 | 0.636343  |
| 18            | 6             | 0           | -3.256028               | 0.645409  | -0.095036 |
| 19            | 1             | 0           | -1.133834               | 1.255947  | -0.207766 |
| 20            | 7             | 0           | -2.197972               | -1.545376 | -0.744917 |
| 21            | 9             | 0           | -2.030120               | 1.327111  | -2.007000 |
| 22            | 8             | 0           | -1.076025               | -1.030784 | -0.769983 |
| 23            | 6             | 0           | -4.352346               | 1.290109  | 0.484703  |
| 24            | 1             | 0           | -4.343614               | 2.370132  | 0.559001  |
| 25            | 8             | 0           | -2.436114               | -2.685630 | -1.144371 |
| 26            | 9             | 0           | -2.360178               | 2.819296  | -0.418011 |
| 27            | 6             | 0           | -5.451601               | 0.570397  | 0.962223  |
| 28            | 1             | 0           | -6.283132               | 1.103299  | 1.411766  |
| 29            | 6             | 0           | -5.481604               | -0.819943 | 0.858546  |
| 30            | 1             | 0           | -6.330850               | -1.384534 | 1.228060  |
| 31            | 6             | 0           | -4.407104               | -1.489196 | 0.276407  |
| 32            | 1             | 0           | -4.400974               | -2.567745 | 0.183337  |
| 33            | 6             | 0           | -3.309138               | -0.760860 | -0.183005 |
| 34            | 6             | 0           | -2.108891               | 1.480964  | -0.633313 |

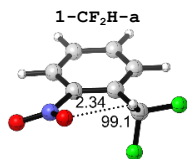

Standard orientation:

| Center Number | Atomic Number | Atomic Type | Coordinates (Angstroms) |           |           |
|---------------|---------------|-------------|-------------------------|-----------|-----------|
|               |               |             | X                       | Y         | Z         |
| 1             | 6             | 0           | -0.390594               | 0.523505  | -0.128643 |
| 2             | 6             | 0           | -0.249814               | 1.913245  | -0.080609 |
| 3             | 6             | 0           | 2.048390                | 0.339780  | 0.048243  |
| 4             | 6             | 0           | 1.008908                | 2.513493  | 0.017978  |
| 5             | 1             | 0           | -1.138652               | 2.530307  | -0.117098 |
| 6             | 6             | 0           | 2.159648                | 1.728493  | 0.082985  |
| 7             | 1             | 0           | 2.923917                | -0.295190 | 0.097116  |
| 8             | 1             | 0           | 1.082812                | 3.595696  | 0.047042  |
| 9             | 1             | 0           | 3.139320                | 2.187822  | 0.159020  |
| 10            | 6             | 0           | -1.782748               | -0.076096 | -0.191223 |
| 11            | 1             | 0           | -1.958703               | -0.742019 | -1.032650 |
| 12            | 9             | 0           | -2.727153               | 0.925903  | -0.245258 |
| 13            | 9             | 0           | -2.036413               | -0.779241 | 0.972339  |
| 14            | 6             | 0           | 0.787949                | -0.246938 | -0.066291 |
| 15            | 7             | 0           | 0.757978                | -1.717352 | -0.138411 |
| 16            | 8             | 0           | 1.715642                | -2.337756 | 0.325146  |
| 17            | 8             | 0           | -0.212253               | -2.255743 | -0.678012 |

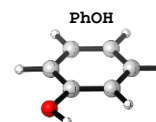

Standard orientation:

| Center Number | Atomic Number | Atomic Type | Coordinates (Angstroms) |           |           |
|---------------|---------------|-------------|-------------------------|-----------|-----------|
|               |               |             | X                       | Y         | Z         |
| 1             | 6             | 0           | -0.940166               | -0.024539 | -0.000083 |
| 2             | 6             | 0           | -0.265758               | 1.202317  | -0.000018 |
| 3             | 6             | 0           | 1.174990                | -1.191844 | 0.000077  |
| 4             | 6             | 0           | 1.132236                | 1.221689  | -0.000029 |
| 5             | 1             | 0           | -0.827680               | 2.133302  | 0.000050  |
| 6             | 6             | 0           | 1.860546                | 0.028555  | 0.000012  |
| 7             | 1             | 0           | 1.728447                | -2.126558 | 0.000190  |
| 8             | 1             | 0           | 1.649587                | 2.176833  | -0.000090 |
| 9             | 1             | 0           | 2.945816                | 0.048796  | 0.000062  |
| 10            | 6             | 0           | -0.220575               | -1.225282 | -0.000054 |
| 11            | 1             | 0           | -0.760644               | -2.166752 | -0.000164 |
| 12            | 8             | 0           | -2.310091               | -0.112798 | -0.000030 |
| 13            | 1             | 0           | -2.702435               | 0.771397  | 0.000756  |

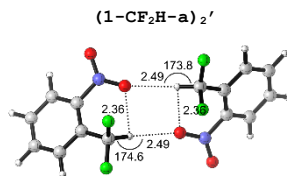

Standard orientation:

| Center Number | Atomic Number | Atomic Type | Coordinates (Angstroms) |           |           |
|---------------|---------------|-------------|-------------------------|-----------|-----------|
|               |               |             | X                       | Y         | Z         |
| 1             | 6             | 0           | -3.324716               | -0.477123 | 0.151883  |
| 2             | 6             | 0           | -4.435038               | -1.317399 | 0.029868  |
| 3             | 6             | 0           | -4.432543               | 1.089036  | -1.377590 |
| 4             | 6             | 0           | -5.520023               | -0.976851 | -0.783226 |
| 5             | 1             | 0           | -4.449270               | -2.247960 | 0.583018  |
| 6             | 6             | 0           | -5.521591               | 0.226753  | -1.487461 |
| 7             | 1             | 0           | -4.404553               | 2.029723  | -1.912737 |
| 8             | 1             | 0           | -6.363306               | -1.655599 | -0.858894 |
| 9             | 1             | 0           | -6.360193               | 0.496848  | -2.120196 |
| 10            | 6             | 0           | -2.194522               | -0.877118 | 1.083070  |
| 11            | 1             | 0           | -1.216009               | -0.956578 | 0.615690  |
| 12            | 9             | 0           | -2.476786               | -2.091773 | 1.670052  |
| 13            | 9             | 0           | -2.108099               | 0.035210  | 2.119881  |
| 14            | 6             | 0           | -3.348676               | 0.730299  | -0.575485 |
| 15            | 7             | 0           | -2.219685               | 1.674314  | -0.547922 |
| 16            | 8             | 0           | -2.436564               | 2.847166  | -0.855361 |
| 17            | 8             | 0           | -1.105649               | 1.240537  | -0.241771 |
| 18            | 1             | 0           | 1.218325                | 0.970392  | 0.598647  |
| 19            | 6             | 0           | 2.194143                | 0.887633  | 1.071101  |
| 20            | 6             | 0           | 3.326760                | 0.478082  | 0.147118  |
| 21            | 6             | 0           | 3.349088                | -0.734013 | -0.572328 |
| 22            | 6             | 0           | 4.440782                | 1.313317  | 0.024486  |
| 23            | 6             | 0           | 4.434866                | -1.102292 | -1.367420 |
| 24            | 6             | 0           | 5.527727                | 0.963398  | -0.782019 |
| 25            | 1             | 0           | 4.456405                | 2.247193  | 0.571998  |
| 26            | 6             | 0           | 5.527603                | -0.244782 | -1.478399 |
| 27            | 1             | 0           | 4.405528                | -2.046390 | -1.896481 |
| 28            | 1             | 0           | 6.373922                | 1.638403  | -0.858613 |
| 29            | 1             | 0           | 6.367785                | -0.522124 | -2.105884 |
| 30            | 7             | 0           | 2.216082                | -1.673090 | -0.543496 |
| 31            | 8             | 0           | 2.430750                | -2.850146 | -0.835946 |
| 32            | 8             | 0           | 1.101345                | -1.231189 | -0.251778 |
| 33            | 9             | 0           | 2.479964                | 2.102931  | 1.654924  |
| 34            | 9             | 0           | 2.097629                | -0.020487 | 2.110767  |

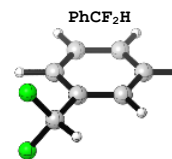

Standard orientation:

| Center Number | Atomic Number | Atomic Type | Coordinates (Angstroms) |           |           |
|---------------|---------------|-------------|-------------------------|-----------|-----------|
|               |               |             | X                       | Y         | Z         |
| 1             | 6             | 0           | -0.168399               | 0.190391  | -0.000343 |
| 2             | 6             | 0           | 0.348842                | -1.113408 | 0.000275  |
| 3             | 6             | 0           | 2.081871                | 1.086983  | -0.000451 |
| 4             | 6             | 0           | 1.729153                | -1.310944 | 0.000596  |
| 5             | 1             | 0           | -0.325546               | -1.964132 | 0.000450  |
| 6             | 6             | 0           | 2.596782                | -0.211341 | 0.000220  |
| 7             | 1             | 0           | 2.752349                | 1.940862  | -0.000861 |
| 8             | 1             | 0           | 2.130124                | -2.319950 | 0.001153  |
| 9             | 1             | 0           | 3.671230                | -0.369103 | 0.000416  |
| 10            | 6             | 0           | -1.648939               | 0.419797  | -0.000485 |
| 11            | 1             | 0           | -1.937176               | 1.473039  | -0.001699 |
| 12            | 9             | 0           | -2.244873               | -0.173990 | 1.103078  |
| 13            | 9             | 0           | -2.245150               | -0.176756 | -1.102369 |
| 14            | 6             | 0           | 0.697910                | 1.288218  | -0.000616 |
| 15            | 1             | 0           | 0.295909                | 2.297826  | -0.001015 |

## 5.4.5. Optimized Coordinates of Reference Compounds for the Development of NMR Scaling Factors

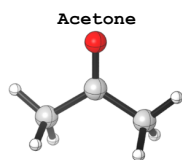

Standard orientation:

| Center Number | Atomic Number | Atomic Type | Coordinates (Angstroms) |           |           |
|---------------|---------------|-------------|-------------------------|-----------|-----------|
|               |               |             | X                       | Y         | Z         |
| 1             | 8             | 0           | 0.000000                | 1.403044  | 0.000000  |
| 2             | 6             | 0           | 0.000000                | 0.178530  | 0.000000  |
| 3             | 6             | 0           | 1.290559                | -0.613074 | 0.002066  |
| 4             | 1             | 0           | 1.283900                | -1.359031 | 0.804561  |
| 5             | 1             | 0           | 1.383440                | -1.163454 | -0.942094 |
| 6             | 1             | 0           | 2.146802                | 0.053166  | 0.118481  |
| 7             | 6             | 0           | -1.290559               | -0.613075 | -0.002066 |
| 8             | 1             | 0           | -1.383440               | -1.163453 | 0.942096  |
| 9             | 1             | 0           | -2.146802               | 0.053164  | -0.118484 |
| 10            | 1             | 0           | -1.283898               | -1.359036 | -0.804558 |

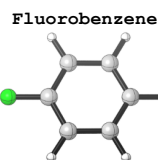

Standard orientation:

| Center Number | Atomic Number | Atomic Type | Coordinates (Angstroms) |           |           |
|---------------|---------------|-------------|-------------------------|-----------|-----------|
|               |               |             | X                       | Y         | Z         |
| 1             | 6             | 0           | -0.261175               | -1.221033 | -0.000095 |
| 2             | 6             | 0           | -0.924103               | -0.000248 | -0.000219 |
| 3             | 6             | 0           | 1.137679                | -1.210990 | 0.000117  |
| 4             | 6             | 0           | -0.261400               | 1.221028  | -0.000017 |
| 5             | 6             | 0           | 1.837783                | 0.000111  | -0.000033 |
| 6             | 1             | 0           | 1.676980                | -2.153319 | 0.000138  |
| 7             | 6             | 0           | 1.137292                | 1.211194  | 0.000030  |
| 8             | 1             | 0           | -0.827527               | 2.146288  | -0.000010 |
| 9             | 1             | 0           | 2.923213                | 0.000336  | 0.000028  |
| 10            | 1             | 0           | 1.676533                | 2.153558  | 0.000096  |
| 11            | 9             | 0           | -2.290983               | -0.000061 | 0.000125  |
| 12            | 1             | 0           | -0.826807               | -2.146684 | -0.000079 |

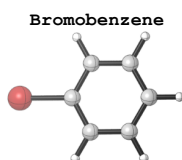

Standard orientation:

| Center Number | Atomic Number | Atomic Type | Coordinates (Angstroms) |           |           |
|---------------|---------------|-------------|-------------------------|-----------|-----------|
|               |               |             | X                       | Y         | Z         |
| 1             | 6             | 0           | -0.781818               | -1.216532 | 0.000044  |
| 2             | 6             | 0           | -0.099489               | -0.000078 | -0.000067 |
| 3             | 6             | 0           | -2.179858               | -1.207699 | -0.000044 |
| 4             | 6             | 0           | -0.781675               | 1.216623  | -0.000018 |
| 5             | 6             | 0           | -2.883133               | 0.000034  | 0.000029  |
| 6             | 1             | 0           | -2.715719               | -2.152262 | -0.000025 |
| 7             | 6             | 0           | -2.179643               | 1.207710  | 0.000010  |
| 8             | 1             | 0           | -0.235958               | 2.153707  | 0.000041  |
| 9             | 1             | 0           | -3.968600               | 0.000231  | 0.000022  |
| 10            | 1             | 0           | -2.715525               | 2.152283  | 0.000027  |
| 11            | 1             | 0           | -0.236086               | -2.153658 | 0.000065  |
| 12            | 35            | 0           | 1.808731                | -0.000019 | 0.000004  |

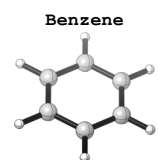

Standard orientation:

| Center Number | Atomic Number | Atomic Type | Coordinates (Angstroms) |           |           |
|---------------|---------------|-------------|-------------------------|-----------|-----------|
|               |               |             | X                       | Y         | Z         |
| 1             | 6             | 0           | -1.272201               | 0.583285  | 0.000102  |
| 2             | 6             | 0           | -0.130941               | 1.392519  | 0.000022  |
| 3             | 6             | 0           | -1.141041               | -0.809831 | -0.000203 |
| 4             | 6             | 0           | 1.141350                | 0.809531  | -0.000086 |
| 5             | 6             | 0           | 0.130679                | -1.392424 | 0.000113  |
| 6             | 1             | 0           | -2.026811               | -1.439108 | -0.000053 |
| 7             | 6             | 0           | 1.272316                | -0.583193 | 0.000004  |
| 8             | 1             | 0           | 2.026154                | 1.439887  | 0.000064  |
| 9             | 1             | 0           | 0.231880                | -2.474156 | 0.000140  |
| 10            | 1             | 0           | 2.259386                | -1.037000 | 0.000011  |
| 11            | 1             | 0           | -2.259720               | 1.036247  | 0.000189  |
| 12            | 1             | 0           | -0.231862               | 2.474808  | -0.000064 |

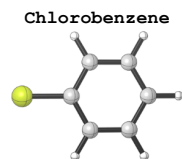

Standard orientation:

| Center Number | Atomic Number | Atomic Type | Coordinates (Angstroms) |           |           |
|---------------|---------------|-------------|-------------------------|-----------|-----------|
|               |               |             | X                       | Y         | Z         |
| 1             | 6             | 0           | -0.178225               | -1.218224 | 0.000073  |
| 2             | 6             | 0           | 0.501887                | -0.000142 | 0.000114  |
| 3             | 6             | 0           | -1.576496               | -1.209434 | -0.000093 |
| 4             | 6             | 0           | -0.178077               | 1.218328  | -0.000005 |
| 5             | 6             | 0           | -2.277624               | 0.000039  | 0.000028  |
| 6             | 1             | 0           | -2.113733               | -2.153055 | -0.000093 |
| 7             | 6             | 0           | -1.576229               | 1.209493  | -0.000012 |
| 8             | 1             | 0           | 0.372378                | 2.152829  | 0.000023  |
| 9             | 1             | 0           | -3.363181               | 0.000264  | -0.000020 |
| 10            | 1             | 0           | -2.113509               | 2.153101  | -0.000050 |
| 11            | 1             | 0           | 0.372128                | -2.152880 | 0.000077  |
| 12            | 17            | 0           | 2.267912                | -0.000037 | -0.000033 |

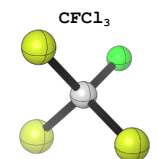

Standard orientation:

| Center Number | Atomic Number | Atomic Type | Coordinates (Angstroms) |           |           |
|---------------|---------------|-------------|-------------------------|-----------|-----------|
|               |               |             | X                       | Y         | Z         |
| 1             | 6             | 0           | -0.000036               | -0.000112 | 0.240019  |
| 2             | 9             | 0           | -0.000019               | -0.000118 | 1.592915  |
| 3             | 17            | 0           | 0.324979                | 1.666242  | -0.309284 |
| 4             | 17            | 0           | -1.605788               | -0.551701 | -0.309368 |
| 5             | 17            | 0           | 1.280832                | -1.114438 | -0.309369 |

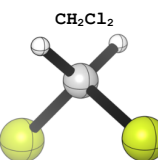

Standard orientation:

| Center Number | Atomic Number | Atomic Type | Coordinates (Angstroms) |           |           |
|---------------|---------------|-------------|-------------------------|-----------|-----------|
|               |               |             | X                       | Y         | Z         |
| 1             | 6             | 0           | 0.000000                | 0.000000  | 0.775444  |
| 2             | 1             | 0           | 0.901391                | 0.000000  | 1.381436  |
| 3             | 17            | 0           | 0.000000                | 1.495044  | -0.218104 |
| 4             | 17            | 0           | 0.000000                | -1.495044 | -0.218104 |
| 5             | 1             | 0           | -0.901391               | 0.000000  | 1.381436  |

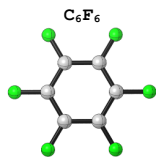

Standard orientation:

| Center Number | Atomic Number | Atomic Type | Coordinates (Angstroms) |           |           |
|---------------|---------------|-------------|-------------------------|-----------|-----------|
|               |               |             | X                       | Y         | Z         |
| 1             | 6             | 0           | 0.451685                | 1.317955  | 0.000012  |
| 2             | 6             | 0           | 1.367109                | 0.267756  | 0.000003  |
| 3             | 6             | 0           | -0.915530               | 1.049981  | -0.000021 |
| 4             | 6             | 0           | 0.915458                | -1.050063 | 0.000124  |
| 5             | 6             | 0           | -1.367207               | -0.267758 | -0.000026 |
| 6             | 6             | 0           | -0.451686               | -1.317944 | 0.000010  |
| 7             | 9             | 0           | 2.681704                | 0.524959  | -0.000150 |
| 8             | 9             | 0           | 0.886319                | 2.585467  | 0.000033  |
| 9             | 9             | 0           | -1.796131               | 2.059624  | 0.000051  |
| 10            | 9             | 0           | -2.681925               | -0.525149 | -0.000039 |
| 11            | 9             | 0           | -0.886244               | -2.585323 | -0.000067 |
| 12            | 9             | 0           | 1.796390                | -2.059529 | 0.000102  |

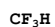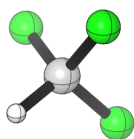

Standard orientation:

| Center Number | Atomic Number | Atomic Type | Coordinates (Angstroms) |           |           |
|---------------|---------------|-------------|-------------------------|-----------|-----------|
|               |               |             | X                       | Y         | Z         |
| 1             | 6             | 0           | -0.000246               | 0.000034  | 0.348905  |
| 2             | 1             | 0           | -0.000297               | 0.000092  | 1.439053  |
| 3             | 9             | 0           | 0.684083                | -1.060652 | -0.130783 |
| 4             | 9             | 0           | 0.577002                | 1.122426  | -0.130814 |
| 5             | 9             | 0           | -1.260888               | -0.061807 | -0.130901 |

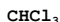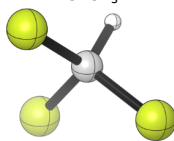

Standard orientation:

| Center Number | Atomic Number | Atomic Type | Coordinates (Angstroms) |           |           |
|---------------|---------------|-------------|-------------------------|-----------|-----------|
|               |               |             | X                       | Y         | Z         |
| 1             | 6             | 0           | 0.000117                | -0.000188 | 0.459451  |
| 2             | 1             | 0           | 0.000156                | -0.000194 | 1.544704  |
| 3             | 17            | 0           | 1.518666                | -0.774715 | -0.084364 |
| 4             | 17            | 0           | -1.430498               | -0.927442 | -0.084341 |
| 5             | 17            | 0           | -0.088219               | 1.702236  | -0.084319 |

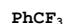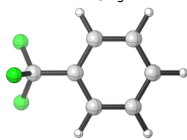

Standard orientation:

| Center Number | Atomic Number | Atomic Type | Coordinates (Angstroms) |           |           |
|---------------|---------------|-------------|-------------------------|-----------|-----------|
|               |               |             | X                       | Y         | Z         |
| 1             | 6             | 0           | 2.843231                | -0.004851 | 0.012326  |
| 2             | 6             | 0           | 2.139577                | -1.213578 | 0.001750  |
| 3             | 6             | 0           | 2.150199                | 1.208837  | 0.001837  |
| 4             | 6             | 0           | 0.744193                | -1.211660 | -0.019049 |
| 5             | 6             | 0           | 0.753712                | 1.219163  | -0.018743 |
| 6             | 1             | 0           | 2.693921                | 2.148272  | 0.007642  |
| 7             | 6             | 0           | 0.054599                | 0.007239  | -0.031074 |
| 8             | 1             | 0           | 0.197280                | -2.148627 | -0.030277 |
| 9             | 1             | 0           | 0.214394                | 2.159859  | -0.029899 |
| 10            | 1             | 0           | 3.928923                | -0.009557 | 0.026863  |
| 11            | 1             | 0           | 2.675719                | -2.157356 | 0.007427  |
| 12            | 6             | 0           | -1.448396               | 0.003939  | -0.004965 |
| 13            | 9             | 0           | -1.979214               | -1.004321 | -0.746259 |
| 14            | 9             | 0           | -1.984709               | 1.159595  | -0.472132 |
| 15            | 9             | 0           | -1.939735               | -0.160509 | 1.259030  |

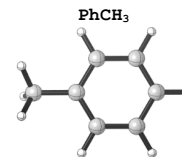

Standard orientation:

| Center Number | Atomic Number | Atomic Type | Coordinates (Angstroms) |           |           |
|---------------|---------------|-------------|-------------------------|-----------|-----------|
|               |               |             | X                       | Y         | Z         |
| 1             | 6             | 0           | -1.908561               | -0.000083 | 0.009136  |
| 2             | 6             | 0           | -1.202972               | 1.207135  | 0.002120  |
| 3             | 6             | 0           | -1.202768               | -1.207245 | 0.002119  |
| 4             | 6             | 0           | 0.195214                | 1.204169  | -0.009623 |
| 5             | 6             | 0           | 0.195359                | -1.204088 | -0.009621 |
| 6             | 1             | 0           | -1.739629               | -2.151960 | 0.002143  |
| 7             | 6             | 0           | 0.916701                | 0.000116  | -0.012468 |
| 8             | 1             | 0           | 0.733918                | 2.148858  | -0.018793 |
| 9             | 1             | 0           | 0.734208                | -2.148699 | -0.018801 |
| 10            | 1             | 0           | -2.994745               | -0.000174 | 0.015426  |
| 11            | 1             | 0           | -1.739948               | 2.151787  | 0.002146  |
| 12            | 6             | 0           | 2.428500                | 0.000053  | 0.009952  |
| 13            | 1             | 0           | 2.835595                | 0.889472  | -0.480717 |
| 14            | 1             | 0           | 2.806069                | -0.006269 | 1.040338  |
| 15            | 1             | 0           | 2.835700                | -0.883364 | -0.491432 |

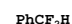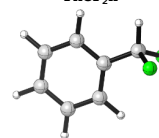

Standard orientation:

| Center Number | Atomic Number | Atomic Type | Coordinates (Angstroms) |           |           |
|---------------|---------------|-------------|-------------------------|-----------|-----------|
|               |               |             | X                       | Y         | Z         |
| 1             | 6             | 0           | -0.168399               | 0.190391  | -0.000343 |
| 2             | 6             | 0           | 0.348842                | -1.113408 | 0.000275  |
| 3             | 6             | 0           | 2.081871                | 1.086983  | -0.000451 |
| 4             | 6             | 0           | 1.729153                | -1.310944 | 0.000596  |
| 5             | 1             | 0           | -0.325546               | -1.964132 | 0.000450  |
| 6             | 6             | 0           | 2.596782                | -0.211341 | 0.000220  |
| 7             | 1             | 0           | 2.752349                | 1.940862  | -0.000861 |
| 8             | 1             | 0           | 2.130124                | -2.319950 | 0.001153  |
| 9             | 1             | 0           | 3.671230                | -0.369103 | 0.000416  |
| 10            | 6             | 0           | -1.648939               | 0.419797  | -0.000485 |
| 11            | 1             | 0           | -1.937176               | 1.473039  | -0.001699 |
| 12            | 9             | 0           | -2.244873               | -0.173990 | 1.103078  |
| 13            | 9             | 0           | -2.245150               | -0.176756 | -1.102369 |
| 14            | 6             | 0           | 0.697910                | 1.288218  | -0.000616 |
| 15            | 1             | 0           | 0.295909                | 2.297826  | -0.001015 |

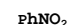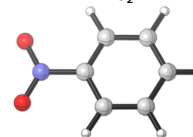

Standard orientation:

| Center Number | Atomic Number | Atomic Type | Coordinates (Angstroms) |           |           |
|---------------|---------------|-------------|-------------------------|-----------|-----------|
|               |               |             | X                       | Y         | Z         |
| 1             | 6             | 0           | 2.518838                | 0.000018  | -0.000043 |
| 2             | 6             | 0           | 1.823065                | -1.214167 | -0.000041 |
| 3             | 6             | 0           | 1.822905                | 1.214198  | 0.000030  |
| 4             | 6             | 0           | 0.428664                | -1.223744 | 0.000026  |
| 5             | 6             | 0           | 0.428538                | 1.223766  | 0.000031  |
| 6             | 1             | 0           | 2.364611                | 2.154290  | 0.000054  |
| 7             | 6             | 0           | -0.244269               | -0.000057 | 0.000038  |
| 8             | 1             | 0           | -0.131142               | -2.150366 | 0.000009  |
| 9             | 1             | 0           | -0.131408               | 2.150302  | 0.000085  |
| 10            | 1             | 0           | 3.604387                | 0.000090  | -0.000061 |
| 11            | 1             | 0           | 2.364725                | -2.154207 | -0.000074 |
| 12            | 7             | 0           | -1.713231               | -0.000033 | 0.000090  |
| 13            | 8             | 0           | -2.296639               | -1.087967 | 0.000000  |
| 14            | 8             | 0           | -2.296486               | 1.087972  | -0.000112 |

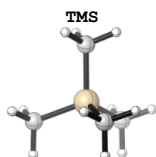

Standard orientation:

| Center Number | Atomic Number | Atomic Type | Coordinates (Angstroms) |           |           |
|---------------|---------------|-------------|-------------------------|-----------|-----------|
|               |               |             | X                       | Y         | Z         |
| 1             | 14            | 0           | -0.074561               | -0.008740 | -0.056406 |
| 2             | 6             | 0           | -0.041286               | 1.540565  | -0.772702 |
| 3             | 1             | 0           | -0.287783               | 2.278494  | -0.038127 |
| 4             | 1             | 0           | 0.937849                | 1.734287  | -1.158276 |
| 5             | 1             | 0           | -0.753067               | 1.579952  | -1.570647 |
| 6             | 6             | 0           | 1.508741                | 0.157434  | 1.052259  |
| 7             | 1             | 0           | 2.368216                | 0.290596  | 0.428985  |
| 8             | 1             | 0           | 1.403497                | 1.002571  | 1.699999  |
| 9             | 1             | 0           | 1.627775                | -0.729214 | 1.639275  |
| 10            | 6             | 0           | 0.480816                | -1.414307 | -0.850427 |
| 11            | 1             | 0           | 0.578408                | -2.209573 | -0.141252 |
| 12            | 1             | 0           | -0.219912               | -1.696254 | -1.608309 |
| 13            | 1             | 0           | 1.432039                | -1.218044 | -1.299377 |
| 14            | 6             | 0           | -1.860842               | -0.274032 | 0.652410  |
| 15            | 1             | 0           | -2.118185               | 0.547673  | 1.287608  |
| 16            | 1             | 0           | -2.560007               | -0.332964 | -0.155424 |
| 17            | 1             | 0           | -1.889551               | -1.183126 | 1.215991  |

TMSCF<sub>2</sub>H

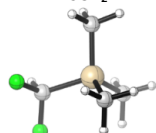

Standard orientation:

| Center Number | Atomic Number | Atomic Type | Coordinates (Angstroms) |           |           |
|---------------|---------------|-------------|-------------------------|-----------|-----------|
|               |               |             | X                       | Y         | Z         |
| 1             | 14            | 0           | -0.074561               | -0.008740 | -0.056406 |
| 2             | 6             | 0           | -0.041286               | 1.540565  | -0.772702 |
| 3             | 1             | 0           | -0.287783               | 2.278494  | -0.038127 |
| 4             | 1             | 0           | 0.937849                | 1.734287  | -1.158276 |
| 5             | 1             | 0           | -0.753067               | 1.579952  | -1.570647 |
| 6             | 6             | 0           | 1.508741                | 0.157434  | 1.052259  |
| 7             | 1             | 0           | 2.368216                | 0.290596  | 0.428985  |
| 8             | 1             | 0           | 1.403497                | 1.002571  | 1.699999  |
| 9             | 1             | 0           | 1.627775                | -0.729214 | 1.639275  |
| 10            | 6             | 0           | 0.480816                | -1.414307 | -0.850427 |
| 11            | 1             | 0           | 0.578408                | -2.209573 | -0.141252 |
| 12            | 1             | 0           | -0.219912               | -1.696254 | -1.608309 |
| 13            | 1             | 0           | 1.432039                | -1.218044 | -1.299377 |
| 14            | 6             | 0           | -1.860842               | -0.274032 | 0.652410  |
| 15            | 1             | 0           | -2.118185               | 0.547673  | 1.287608  |
| 16            | 1             | 0           | -2.560007               | -0.332964 | -0.155424 |
| 17            | 1             | 0           | -1.889551               | -1.183126 | 1.215991  |

TMSCF<sub>3</sub>

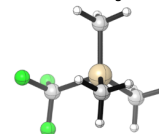

Standard orientation:

| Center Number | Atomic Number | Atomic Type | Coordinates (Angstroms) |           |           |
|---------------|---------------|-------------|-------------------------|-----------|-----------|
|               |               |             | X                       | Y         | Z         |
| 1             | 6             | 0           | 1.090958                | 0.000334  | -0.000615 |
| 2             | 9             | 0           | 1.629650                | 0.985425  | 0.787267  |
| 3             | 9             | 0           | 1.630583                | 0.189939  | -1.247221 |
| 4             | 9             | 0           | 1.629541                | -1.174558 | 0.458769  |
| 5             | 14            | 0           | -0.867601               | 0.000120  | -0.000288 |
| 6             | 6             | 0           | -1.381713               | -0.275546 | 1.787324  |
| 7             | 1             | 0           | -1.007696               | 0.521583  | 2.438272  |
| 8             | 1             | 0           | -2.475011               | -0.286863 | 1.864204  |
| 9             | 1             | 0           | -1.008471               | -1.232434 | 2.166960  |
| 10            | 6             | 0           | -1.384252               | -1.410451 | -1.131040 |
| 11            | 1             | 0           | -2.477653               | -1.473280 | -1.174025 |
| 12            | 1             | 0           | -1.016235               | -1.260247 | -2.151348 |
| 13            | 1             | 0           | -1.006722               | -2.372014 | -0.767836 |
| 14            | 6             | 0           | -1.385603               | 1.684945  | -0.654528 |
| 15            | 1             | 0           | -1.012302               | 1.851727  | -1.670347 |
| 16            | 1             | 0           | -2.479116               | 1.754024  | -0.682784 |
| 17            | 1             | 0           | -1.014673               | 2.492878  | -0.015239 |

DMF

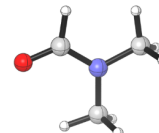

Standard orientation:

| Center Number | Atomic Number | Atomic Type | Coordinates (Angstroms) |           |           |
|---------------|---------------|-------------|-------------------------|-----------|-----------|
|               |               |             | X                       | Y         | Z         |
| 1             | 8             | 0           | 1.962552                | -0.092520 | 0.000010  |
| 2             | 6             | 0           | -0.431898               | 1.434010  | -0.000004 |
| 3             | 1             | 0           | 0.575335                | 1.849184  | -0.000550 |
| 4             | 1             | 0           | -0.970035               | 1.780028  | -0.889887 |
| 5             | 1             | 0           | -0.969110               | 1.780115  | 0.890403  |
| 6             | 6             | 0           | -1.589895               | -0.768843 | 0.000005  |
| 7             | 1             | 0           | -2.182521               | -0.527308 | -0.889825 |
| 8             | 1             | 0           | -1.379007               | -1.840395 | -0.000111 |
| 9             | 1             | 0           | -2.182428               | -0.527481 | 0.889945  |
| 10            | 7             | 0           | -0.340437               | -0.020391 | 0.000005  |
| 11            | 6             | 0           | 0.859453                | -0.646152 | -0.000011 |
| 12            | 1             | 0           | 0.764450                | -1.745332 | -0.000032 |

## 5.5. Partitioning Analysis

### 5.5.1. Structural Optimization at the M06-2X/6-31+G(d,p) Level of Theory in the Gas Phase

The charge density and the energy partitioning analyses were performed on M06-2X/aug-cc-pVTZ wavefunctions, where geometries had been optimized at the M06-2X/6-31+G(d,p) level of theory. All these calculations were performed in vacuum (no PCM). Selected details of the QTAIM charge density analysis are shown in Table S16. IR frequencies were calculated at the M06-2X/6-31+G(d,p) level of theory using Gaussian 09.<sup>5</sup> The default weighting scheme in Gaussian 09 (SSweight) was used for DFT numerical integration calculations (Figure S41).

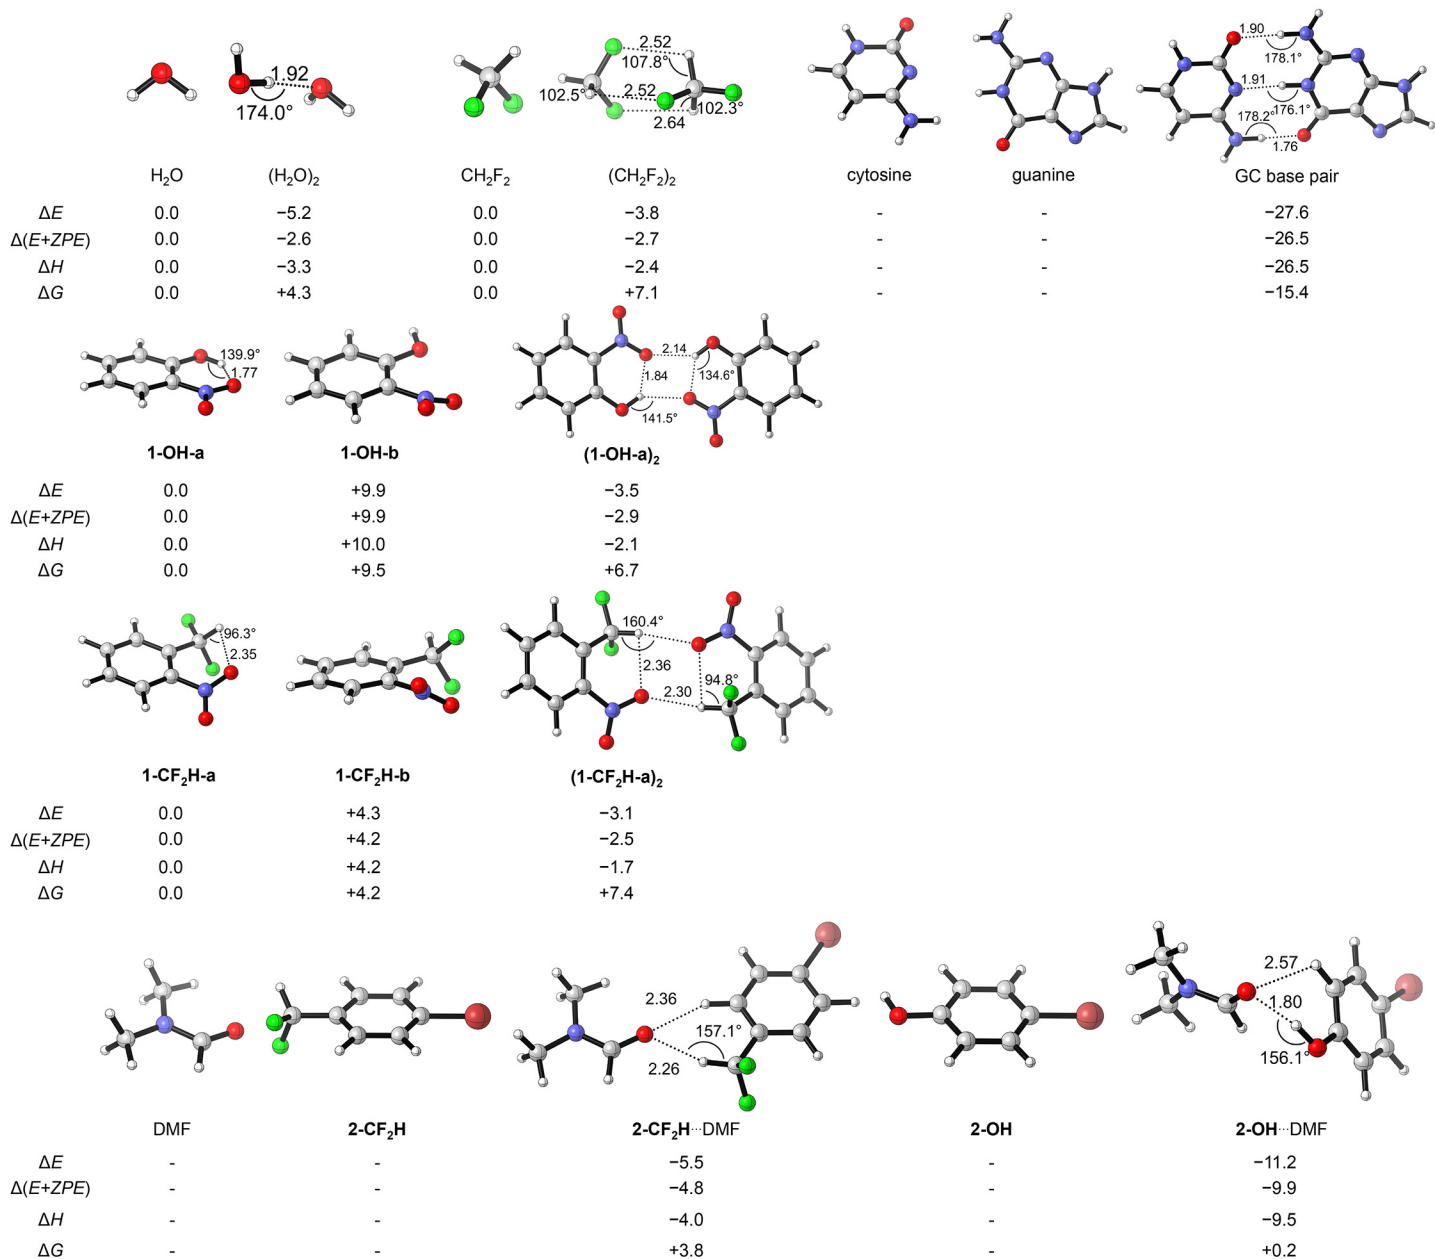

**Figure S40.** Calculated molecules and their complexes in the gas phase and calculated relative energies ( $\Delta E$ ), relative energies with zero point energy correction ( $\Delta(E+ZPE)$ ), enthalpies ( $\Delta H$ ), and Gibbs free energies ( $\Delta G$ ). All energies are in kcal/mol.

**Table S14.** Energies of calculated structures at the M06-2X/6-31+G(d,p) level of theory in the gas phase.

| M062X/6-31+G(d,p)                              |                |                              |                    |                                   |                |                              |                |                              |                                |                                                   |                                                                  |
|------------------------------------------------|----------------|------------------------------|--------------------|-----------------------------------|----------------|------------------------------|----------------|------------------------------|--------------------------------|---------------------------------------------------|------------------------------------------------------------------|
|                                                | E<br>(hartree) | $\Delta E$<br>(kcal/<br>mol) | E+ZPE<br>(hartree) | $\Delta(E+ZPE)$<br>(kcal/<br>mol) | H<br>(hartree) | $\Delta H$<br>(kcal/<br>mol) | G<br>(hartree) | $\Delta G$<br>(kcal/<br>mol) | ZPE<br>correction<br>(hartree) | Thermal<br>Correction<br>to Enthalpy<br>(hartree) | Thermal<br>Correction<br>to Gibbs<br>Free<br>Energy<br>(hartree) |
| H <sub>2</sub> O                               | -76.394964     | -                            | -76.373332         | -                                 | -76.369551     | -                            | -76.391623     | -                            | 0.021632                       | 0.025412                                          | 0.003341                                                         |
| (H <sub>2</sub> O) <sub>2</sub>                | -152.800557    | -6.7                         | -152.753186        | -4.1                              | -152.746778    | -4.8                         | -152.778749    | 2.8                          | 0.047371                       | 0.053779                                          | 0.021807                                                         |
| CF <sub>2</sub> H <sub>2</sub>                 | -238.907037    | -                            | -238.873640        | -                                 | -238.869582    | -                            | -238.898221    | -                            | 0.033397                       | 0.037455                                          | 0.008816                                                         |
| (CF <sub>2</sub> H <sub>2</sub> ) <sub>2</sub> | -477.820057    | -3.8                         | -477.751565        | -2.7                              | -477.742964    | -2.4                         | -477.785057    | 7.1                          | 0.068491                       | 0.077093                                          | 0.034999                                                         |
| cytosine                                       | -394.796685    | -                            | -394.697148        | -                                 | -394.689424    | -                            | -394.728079    | -                            | 0.099537                       | 0.107260                                          | 0.068605                                                         |
| guanine                                        | -542.379877    | -                            | -542.261493        | -                                 | -542.252378    | -                            | -542.294465    | -                            | 0.118385                       | 0.127500                                          | 0.085412                                                         |
| GC base pair                                   | -937.222093    | -28.6                        | -937.002407        | -27.5                             | -936.985441    | -27.4                        | -937.048553    | -16.3                        | 0.219686                       | 0.236652                                          | 0.173540                                                         |
| <b>1-OH-a</b>                                  | -511.798919    | -                            | -511.690160        | -                                 | -511.681610    | -                            | -511.722899    | -                            | 0.108759                       | 0.117309                                          | 0.076020                                                         |
| <b>1-OH-b</b>                                  | -511.788395    | 6.6                          | -511.679637        | 6.6                               | -511.670810    | 6.8                          | -511.712937    | 6.3                          | 0.108759                       | 0.117586                                          | 0.075458                                                         |
| <b>(1-OH-a)<sub>2</sub></b>                    | -1023.604525   | -4.2                         | -1023.385992       | -3.6                              | -1023.367645   | -2.8                         | -1023.436303   | 6.0                          | 0.218533                       | 0.236880                                          | 0.168222                                                         |
| <b>1-CF<sub>2</sub>H-a</b>                     | -674.306390    | -                            | -674.188037        | -                                 | -674.177633    | -                            | -674.223819    | -                            | 0.118353                       | 0.128756                                          | 0.082571                                                         |
| <b>1-CF<sub>2</sub>H-b</b>                     | -674.299204    | 4.5                          | -674.181013        | 4.4                               | -674.170562    | 4.4                          | -674.216700    | 4.5                          | 0.118191                       | 0.128642                                          | 0.082504                                                         |
| <b>(1-CF<sub>2</sub>H-a)<sub>2</sub></b>       | -1348.621675   | -5.6                         | -1348.383934       | -4.9                              | -1348.362066   | -4.3                         | -1348.437428   | 6.4                          | 0.237741                       | 0.259609                                          | 0.184246                                                         |
| <b>DMF</b>                                     | -248.408991    | -                            | -248.305475        | -                                 | -248.298435    | -                            | -248.334713    | -                            | 0.103517                       | 0.110556                                          | 0.074278                                                         |
| <b>2-CF<sub>2</sub>H</b>                       | -3041.082490   | -                            | -3040.977051       | -                                 | -3040.967656   | -                            | -3041.013085   | -                            | 0.105439                       | 0.114834                                          | 0.069405                                                         |
| <b>2-CF<sub>2</sub>H<sup>+</sup> DMF</b>       | -3289.501570   | -6.3                         | -3289.291533       | -5.7                              | -3289.273821   | -4.9                         | -3289.343067   | 3.0                          | 0.210037                       | 0.227748                                          | 0.158503                                                         |
| <b>2-OH</b>                                    | -2878.555905   | -                            | -2878.459688       | -                                 | -2878.452066   | -                            | -2878.491757   | -                            | 0.096217                       | 0.103839                                          | 0.064148                                                         |
| <b>2-OH<sup>+</sup> DMF</b>                    | -3126.984208   | -12.1                        | -3126.782463       | -10.9                             | -3126.767169   | -10.5                        | -3126.827648   | -0.7                         | 0.201745                       | 0.217039                                          | 0.156560                                                         |



**Table S15.** Single point energies of calculated structures at the M062X/aug-cc-PVTZ level of theory with thermal or zero point energy corrections obtained at the M06-2X/6-31+G(d,p) level of theory in the gas phase.

| M062X/aug-cc-PVTZ                              |                |                          |                    |                               |                                                       |                          |                                                                  |                          |
|------------------------------------------------|----------------|--------------------------|--------------------|-------------------------------|-------------------------------------------------------|--------------------------|------------------------------------------------------------------|--------------------------|
|                                                | E<br>(hartree) | $\Delta E$<br>(kcal/mol) | E+ZPE<br>(hartree) | $\Delta(E+ZPE)$<br>(kcal/mol) | E + Thermal<br>Correction to<br>Enthalpy<br>(hartree) | $\Delta H$<br>(kcal/mol) | E+ Thermal<br>Correction to<br>Gibbs Free<br>Energy<br>(hartree) | $\Delta G$<br>(kcal/mol) |
| H <sub>2</sub> O                               | -76.43009222   | 0.0                      | -76.408460         | 0.0                           | -76.404680                                            | 0.0                      | -76.426751                                                       | 0.0                      |
| (H <sub>2</sub> O) <sub>2</sub>                | -152.8684207   | -5.2                     | -152.821050        | -2.6                          | -152.814642                                           | -3.3                     | -152.846614                                                      | 4.3                      |
| CF <sub>2</sub> H <sub>2</sub>                 | -239.0024858   | 0.0                      | -238.969089        | 0.0                           | -238.965031                                           | 0.0                      | -238.993670                                                      | 0.0                      |
| (CF <sub>2</sub> H <sub>2</sub> ) <sub>2</sub> | -478.01102     | -3.8                     | -477.942529        | -2.7                          | -477.933927                                           | -2.4                     | -477.976021                                                      | 7.1                      |
| cytosine                                       | -394.9360551   | -                        | -394.836518        | -                             | -394.828795                                           | -                        | -394.867450                                                      | -                        |
| guanine                                        | -542.5674374   | -                        | -542.449052        | -                             | -542.439937                                           | -                        | -542.482025                                                      | -                        |
| GC base pair                                   | -937.5475562   | -27.6                    | -937.327870        | -26.5                         | -937.310904                                           | -26.5                    | -937.374016                                                      | -15.4                    |
| <b>1-OH-a</b>                                  | -511.9766334   | 0.0                      | -511.867874        | 0.0                           | -511.859324                                           | 0.0                      | -511.900613                                                      | 0.0                      |
| <b>1-OH-b</b>                                  | -511.9608978   | 9.9                      | -511.852139        | 9.9                           | -511.843312                                           | 10.0                     | -511.885440                                                      | 9.5                      |
| <b>(1-OH-a)<sub>2</sub></b>                    | -1023.958827   | -3.5                     | -1023.740294       | -2.9                          | -1023.721947                                          | -2.1                     | -1023.790605                                                     | 6.7                      |
| <b>1-CF<sub>2</sub>H-a</b>                     | -674.5503432   | 0.0                      | -674.4319902       | 0.0                           | -674.4215872                                          | 0.0                      | -674.4677722                                                     | 0.0                      |
| <b>1-CF<sub>2</sub>H-b</b>                     | -674.543547    | 4.3                      | -674.425356        | 4.2                           | -674.414905                                           | 4.2                      | -674.461043                                                      | 4.2                      |
| <b>(1-CF<sub>2</sub>H-a)<sub>2</sub></b>       | -1349.105606   | -3.1                     | -1348.867925       | -2.5                          | -1348.845823                                          | -1.7                     | -1348.923732                                                     | 7.4                      |
| DMF                                            | -248.4969778   | -                        | -248.393461        | -                             | -248.386422                                           | -                        | -248.422700                                                      | -                        |
| <b>2-CF<sub>2</sub>H</b>                       | -3043.687451   | -                        | -3043.582012       | -                             | -3043.572617                                          | -                        | -3043.618046                                                     | -                        |
| <b>2-CF<sub>2</sub>H+DMF</b>                   | -3292.193126   | -5.5                     | -3291.983089       | -4.8                          | -3291.965378                                          | -4.0                     | -3292.034623                                                     | 3.8                      |
| <b>2-OH</b>                                    | -2881.101586   | -                        | -2881.005369       | -                             | -2880.997747                                          | -                        | -2881.037438                                                     | -                        |
| <b>2-OH+DMF</b>                                | -3129.616373   | -11.2                    | -3129.414628       | -9.9                          | -3129.399334                                          | -9.5                     | -3129.459813                                                     | 0.2                      |

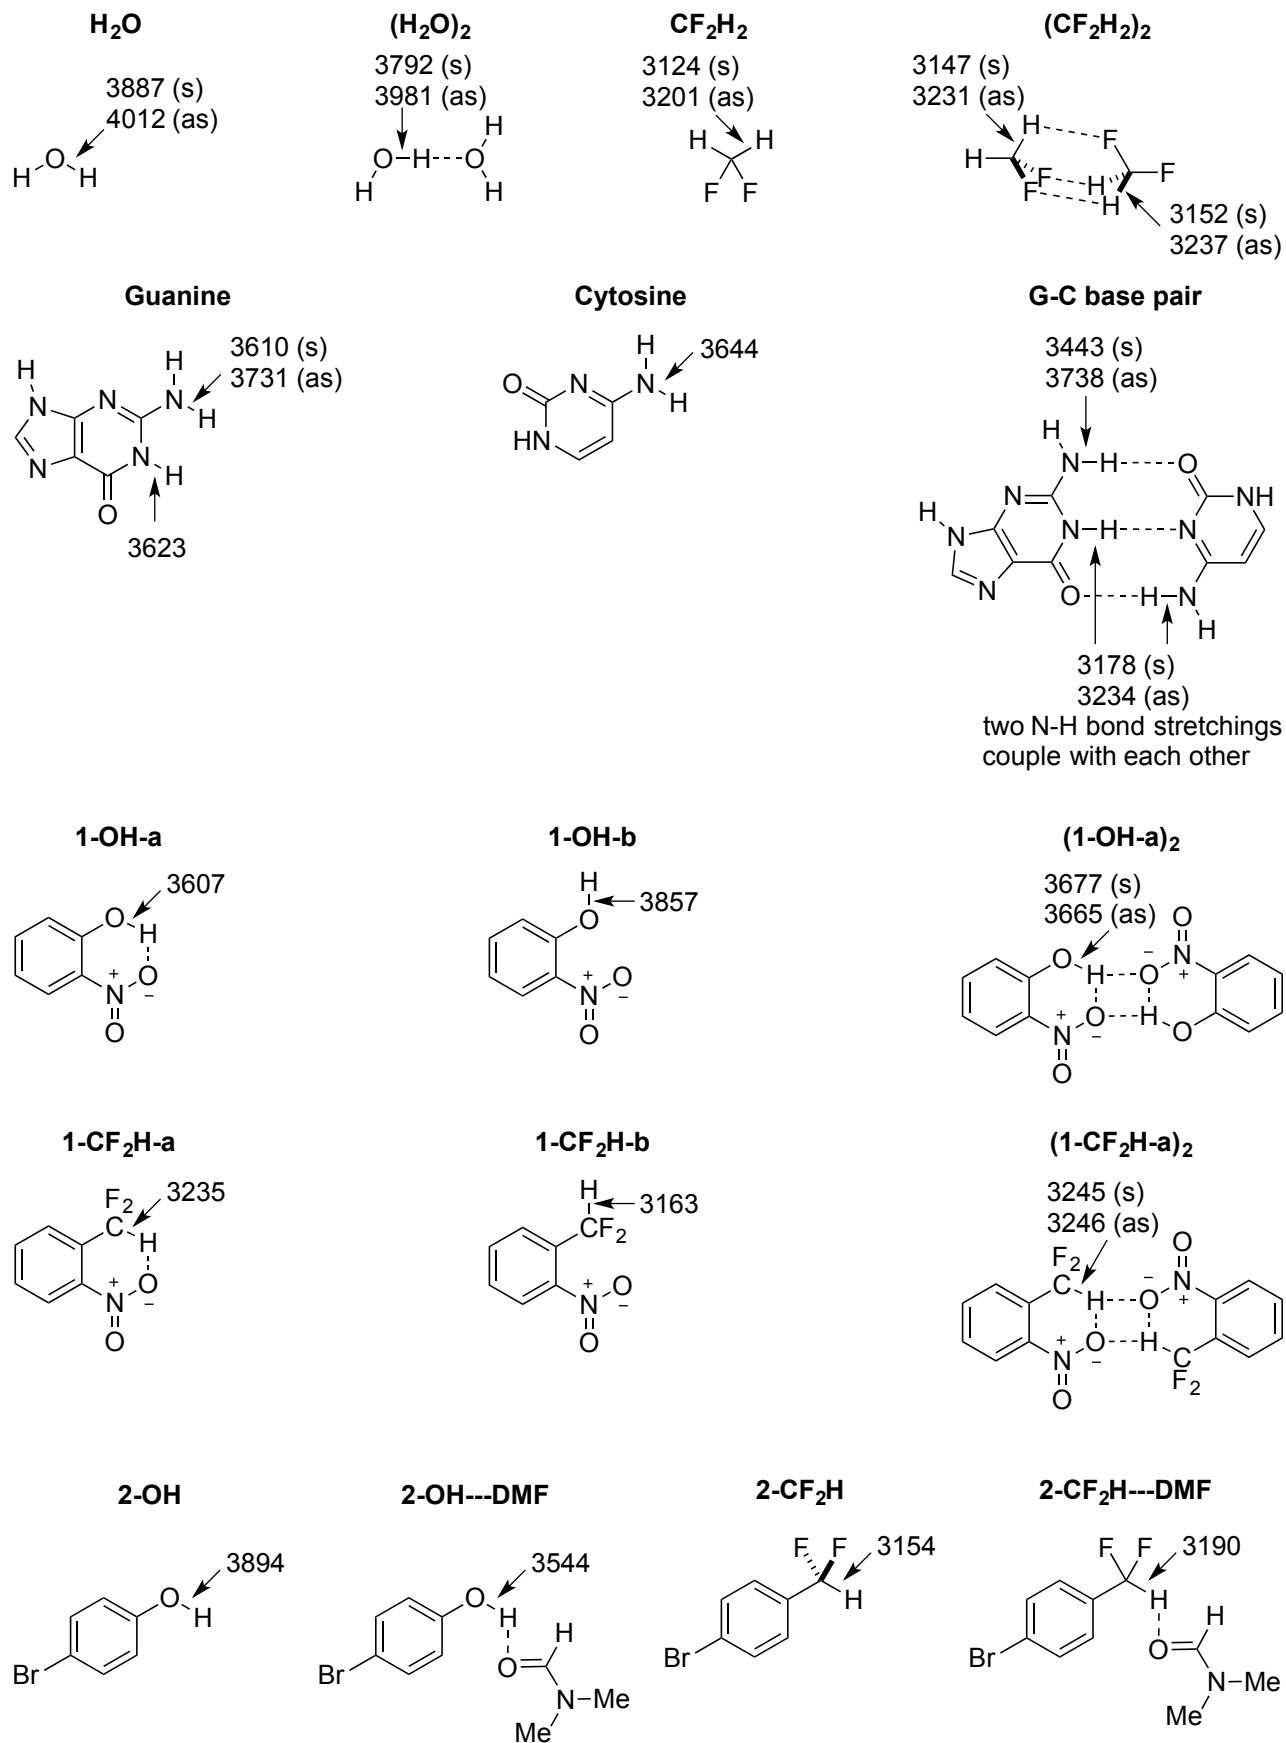

**Figure S41.** Vibrational frequencies ( $\text{cm}^{-1}$ ) of X-H bonds of compounds in Table S14 calculated at the M06-2X/6-31+G(d,p) level of theory in the gas phase. Symmetric (s) and asymmetric stretches (as) are indicated.

## 5.5.2. Optimized Coordinates of Molecules and Complexes for Partitioning Analysis

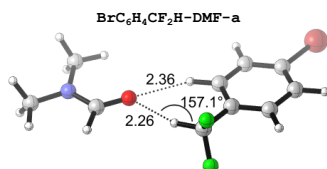

Standard orientation:

| Center Number | Atomic Number | Atomic Type | Coordinates (Angstroms) |           |           |
|---------------|---------------|-------------|-------------------------|-----------|-----------|
|               |               |             | X                       | Y         | Z         |
| 1             | 6             | 0           | -0.443053               | 1.334277  | 0.012062  |
| 2             | 6             | 0           | -1.710898               | 1.917465  | 0.037305  |
| 3             | 6             | 0           | -1.436518               | -0.863107 | -0.031747 |
| 4             | 6             | 0           | -2.845283               | 1.115807  | 0.028447  |
| 5             | 1             | 0           | -1.806813               | 2.998772  | 0.065167  |
| 6             | 6             | 0           | -2.692029               | -0.269308 | -0.006164 |
| 7             | 1             | 0           | -1.344709               | -1.943139 | -0.058563 |
| 8             | 1             | 0           | -3.837263               | 1.553133  | 0.049113  |
| 9             | 6             | 0           | 0.778782                | 2.202886  | 0.020731  |
| 10            | 1             | 0           | 1.711029                | 1.634601  | 0.019830  |
| 11            | 9             | 0           | 0.765673                | 3.027082  | 1.116807  |
| 12            | 9             | 0           | 0.772337                | 3.038490  | -1.067201 |
| 13            | 6             | 0           | -0.303250               | -0.049904 | -0.022005 |
| 14            | 1             | 0           | 0.691081                | -0.488786 | -0.040650 |
| 15            | 6             | 0           | 4.251254                | -0.139708 | -0.088391 |
| 16            | 1             | 0           | 4.780551                | 0.817983  | -0.232672 |
| 17            | 35            | 0           | -4.233212               | -1.360455 | -0.017270 |
| 18            | 8             | 0           | 3.031492                | -0.198986 | -0.015348 |
| 19            | 7             | 0           | 5.090456                | -1.194562 | -0.005768 |
| 20            | 6             | 0           | 4.574791                | -2.537084 | 0.186432  |
| 21            | 1             | 0           | 4.984137                | -2.968705 | 1.105866  |
| 22            | 1             | 0           | 3.489320                | -2.483708 | 0.259997  |
| 23            | 1             | 0           | 4.854961                | -3.174113 | -0.659209 |
| 24            | 6             | 0           | 6.527158                | -1.040202 | -0.103342 |
| 25            | 1             | 0           | 6.917616                | -1.612973 | -0.951505 |
| 26            | 1             | 0           | 6.775796                | 0.013088  | -0.248452 |
| 27            | 1             | 0           | 7.013795                | -1.393307 | 0.812275  |

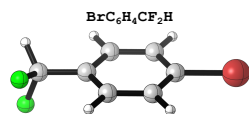

Standard orientation:

| Center Number | Atomic Number | Atomic Type | Coordinates (Angstroms) |           |           |
|---------------|---------------|-------------|-------------------------|-----------|-----------|
|               |               |             | X                       | Y         | Z         |
| 1             | 6             | 0           | 1.707167                | 0.137039  | -0.169344 |
| 2             | 6             | 0           | 1.074635                | -1.084701 | 0.050638  |
| 3             | 6             | 0           | -0.435143               | 1.248320  | -0.255229 |
| 4             | 6             | 0           | -0.313918               | -1.147168 | 0.118223  |
| 5             | 1             | 0           | 1.666508                | -1.987186 | 0.160850  |
| 6             | 6             | 0           | -1.053813               | 0.021214  | -0.035870 |
| 7             | 1             | 0           | -1.030893               | 2.146282  | -0.373779 |
| 8             | 1             | 0           | -0.817817               | -2.092239 | 0.286392  |
| 9             | 6             | 0           | 3.205423                | 0.229978  | -0.215804 |
| 10            | 1             | 0           | 3.574196                | 0.964523  | -0.937831 |
| 11            | 9             | 0           | 3.758039                | -0.976964 | -0.520243 |
| 12            | 9             | 0           | 3.693137                | 0.583178  | 1.012745  |
| 13            | 6             | 0           | 0.953164                | 1.298387  | -0.325456 |
| 14            | 1             | 0           | 1.447821                | 2.250424  | -0.499671 |
| 15            | 35            | 0           | -2.935014               | -0.055890 | 0.055102  |

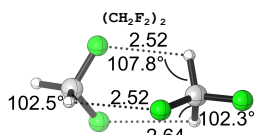

Standard orientation:

| Center Number | Atomic Number | Atomic Type | Coordinates (Angstroms) |           |           |
|---------------|---------------|-------------|-------------------------|-----------|-----------|
|               |               |             | X                       | Y         | Z         |
| 1             | 6             | 0           | 1.374207                | 0.014124  | -0.338723 |
| 2             | 9             | 0           | 0.911679                | -0.131721 | 0.940190  |
| 3             | 9             | 0           | 2.757542                | 0.053840  | -0.232102 |
| 4             | 1             | 0           | 1.064147                | -0.891075 | -0.941327 |
| 5             | 1             | 0           | 0.992151                | 0.991805  | -0.754580 |
| 6             | 1             | 0           | -1.578022               | -0.083114 | 1.322010  |
| 7             | 6             | 0           | -1.968479               | -0.002880 | 0.311604  |
| 8             | 1             | 0           | -3.053837               | 0.019535  | 0.247593  |
| 9             | 9             | 0           | -1.474228               | 1.124869  | -0.262811 |
| 10            | 9             | 0           | -1.512638               | -1.058612 | -0.413165 |

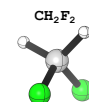

Standard orientation:

| Center Number | Atomic Number | Atomic Type | Coordinates (Angstroms) |           |           |
|---------------|---------------|-------------|-------------------------|-----------|-----------|
|               |               |             | X                       | Y         | Z         |
| 1             | 6             | 0           | 0.000029                | 0.506148  | -0.000070 |
| 2             | 9             | 0           | 1.100811                | -0.291190 | -0.000090 |
| 3             | 9             | 0           | -1.100839               | -0.291163 | 0.000120  |
| 4             | 1             | 0           | 0.000088                | 1.102378  | 0.914500  |
| 5             | 1             | 0           | -0.000002               | 1.101908  | -0.914340 |

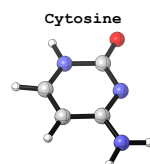

Standard orientation:

| Center Number | Atomic Number | Atomic Type | Coordinates (Angstroms) |           |           |
|---------------|---------------|-------------|-------------------------|-----------|-----------|
|               |               |             | X                       | Y         | Z         |
| 1             | 6             | 0           | 1.127230                | -0.254612 | -0.001096 |
| 2             | 6             | 0           | 1.048277                | 1.185609  | -0.000756 |
| 3             | 6             | 0           | -0.201481               | 1.709074  | 0.000657  |
| 4             | 6             | 0           | -0.1183024              | -0.525664 | 0.000076  |
| 5             | 7             | 0           | 0.082235                | -1.051074 | 0.000787  |
| 6             | 1             | 0           | -0.397579               | 2.775895  | 0.000946  |
| 7             | 1             | 0           | 1.929075                | 1.812966  | -0.005045 |
| 8             | 1             | 0           | -2.221926               | 1.253403  | 0.001888  |
| 9             | 7             | 0           | -1.278786               | 0.890182  | 0.001114  |
| 10            | 8             | 0           | -2.213348               | -1.171921 | 0.000272  |
| 11            | 7             | 0           | 2.348952                | -0.839672 | -0.015822 |
| 12            | 1             | 0           | 3.195528                | -0.303622 | 0.066194  |
| 13            | 1             | 0           | 2.389136                | -1.845768 | 0.038000  |

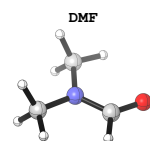

Standard orientation:

| Center Number | Atomic Number | Atomic Type | Coordinates (Angstroms) |           |           |
|---------------|---------------|-------------|-------------------------|-----------|-----------|
|               |               |             | X                       | Y         | Z         |
| 1             | 6             | 0           | 0.862024                | -0.648892 | -0.000133 |
| 2             | 1             | 0           | 0.762796                | -1.749802 | -0.000271 |
| 3             | 8             | 0           | 1.945222                | -0.094105 | 0.000232  |
| 4             | 7             | 0           | -0.343203               | -0.022002 | -0.000599 |
| 5             | 6             | 0           | -0.417652               | 1.425268  | 0.000043  |
| 6             | 1             | 0           | -0.950119               | 1.778009  | 0.890570  |
| 7             | 1             | 0           | 0.597345                | 1.821902  | 0.000590  |
| 8             | 1             | 0           | -0.949502               | 1.778869  | -0.890504 |
| 9             | 6             | 0           | -1.589507               | -0.754909 | 0.000222  |
| 10            | 1             | 0           | -2.182801               | -0.510579 | -0.888343 |
| 11            | 1             | 0           | -1.385495               | -1.827915 | -0.001176 |
| 12            | 1             | 0           | -2.180771               | -0.512430 | 0.890682  |

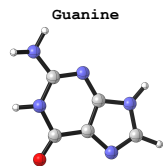

Standard orientation:

| Center Number | Atomic Number | Atomic Type | Coordinates (Angstroms) |           |           |
|---------------|---------------|-------------|-------------------------|-----------|-----------|
|               |               |             | X                       | Y         | Z         |
| 1             | 6             | 0           | -0.854404               | 0.501101  | 0.009141  |
| 2             | 6             | 0           | -0.530446               | -0.848684 | -0.000906 |
| 3             | 6             | 0           | 1.665829                | -0.568088 | -0.002467 |
| 4             | 6             | 0           | 0.216478                | 1.466278  | 0.003247  |
| 5             | 6             | 0           | -2.708640               | -0.525140 | 0.000805  |
| 6             | 1             | 0           | 2.269372                | 1.408825  | -0.084300 |
| 7             | 1             | 0           | -3.759440               | -0.777663 | -0.001258 |
| 8             | 1             | 0           | -1.855151               | -2.499426 | -0.012731 |
| 9             | 8             | 0           | 0.195511                | 2.678556  | -0.003411 |
| 10            | 7             | 0           | 1.473345                | 0.787110  | -0.005238 |
| 11            | 1             | 0           | 3.064245                | -1.994598 | 0.091595  |
| 12            | 7             | 0           | 2.967641                | -1.001099 | -0.064527 |
| 13            | 1             | 0           | 3.673973                | -0.435220 | 0.382633  |
| 14            | 7             | 0           | 0.694432                | -1.439140 | 0.007315  |
| 15            | 7             | 0           | -2.218465               | 0.682484  | 0.008938  |
| 16            | 7             | 0           | -1.729810               | -1.498380 | -0.004712 |

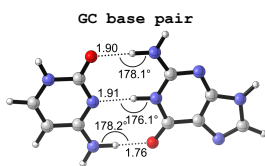

Standard orientation:

| Center Number | Atomic Number | Atomic Type | Coordinates (Angstroms) |           |           |
|---------------|---------------|-------------|-------------------------|-----------|-----------|
|               |               |             | X                       | Y         | Z         |
| 1             | 6             | 0           | 2.836830                | -0.738423 | -0.000037 |
| 2             | 6             | 0           | 3.303211                | 0.573644  | 0.000134  |
| 3             | 6             | 0           | 1.302136                | 1.525431  | -0.000051 |
| 4             | 6             | 0           | 1.420484                | -0.941296 | -0.000210 |
| 5             | 6             | 0           | 4.951068                | -0.895066 | 0.000195  |
| 6             | 1             | 0           | 5.969514                | -1.257070 | 0.000288  |
| 7             | 1             | 0           | 5.316388                | 1.226807  | 0.000518  |
| 8             | 8             | 0           | 0.791183                | -2.002180 | -0.000356 |
| 9             | 7             | 0           | 0.730659                | 0.277849  | -0.000195 |
| 10            | 1             | 0           | 0.865028                | 3.489743  | 0.000308  |
| 11            | 7             | 0           | 0.453853                | 2.571401  | 0.000062  |
| 12            | 1             | 0           | -0.560288               | 2.460965  | -0.000165 |
| 13            | 7             | 0           | 2.605125                | 1.728905  | 0.000147  |
| 14            | 7             | 0           | 3.882762                | -1.638560 | 0.000013  |
| 15            | 7             | 0           | 4.664176                | 0.457542  | 0.000334  |
| 16            | 1             | 0           | -0.298939               | 0.197505  | -0.000270 |
| 17            | 6             | 0           | -2.769539               | -1.277390 | -0.000115 |
| 18            | 6             | 0           | -4.206934               | -1.424932 | 0.000380  |
| 19            | 1             | 0           | -4.840454               | 1.788829  | 0.000452  |
| 20            | 1             | 0           | -4.676848               | -2.398991 | 0.000634  |
| 21            | 7             | 0           | -2.184167               | -0.079990 | -0.000418 |
| 22            | 7             | 0           | -4.318380               | 0.923416  | 0.000236  |
| 23            | 6             | 0           | -2.922728               | 1.057826  | -0.000237 |
| 24            | 6             | 0           | -4.936360               | -0.286555 | 0.000566  |
| 25            | 1             | 0           | -6.020492               | -0.277540 | 0.001083  |
| 26            | 7             | 0           | -1.984176               | -2.352863 | -0.000146 |
| 27            | 1             | 0           | -0.956350               | -2.243435 | -0.000352 |
| 28            | 1             | 0           | -2.385665               | -3.275926 | 0.000270  |
| 29            | 8             | 0           | -2.444916               | 2.191654  | -0.000487 |

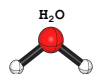

Standard orientation:

| Center Number | Atomic Number | Atomic Type | Coordinates (Angstroms) |           |           |
|---------------|---------------|-------------|-------------------------|-----------|-----------|
|               |               |             | X                       | Y         | Z         |
| 1             | 8             | 0           | 0.000000                | 0.000000  | 0.115575  |
| 2             | 1             | 0           | 0.000000                | -0.768770 | -0.462300 |
| 3             | 1             | 0           | 0.000000                | 0.768770  | -0.462300 |

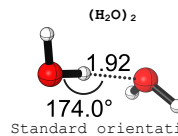

Standard orientation:

| Center Number | Atomic Number | Atomic Type | Coordinates (Angstroms) |           |           |
|---------------|---------------|-------------|-------------------------|-----------|-----------|
|               |               |             | X                       | Y         | Z         |
| 1             | 8             | 0           | -1.505055               | 0.029816  | -0.116075 |
| 2             | 8             | 0           | 1.367203                | -0.020421 | 0.097571  |
| 3             | 1             | 0           | -1.902984               | -0.190687 | 0.730192  |
| 4             | 1             | 0           | -0.546390               | -0.018337 | 0.015399  |
| 5             | 1             | 0           | 1.794786                | -0.689830 | -0.446212 |
| 6             | 1             | 0           | 1.757403                | 0.823696  | -0.151345 |

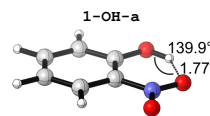

Standard orientation:

| Center Number | Atomic Number | Atomic Type | Coordinates (Angstroms) |           |           |
|---------------|---------------|-------------|-------------------------|-----------|-----------|
|               |               |             | X                       | Y         | Z         |
| 1             | 6             | 0           | 0.424755                | 0.993659  | 0.000010  |
| 2             | 6             | 0           | -0.215713               | -0.262060 | 0.000029  |
| 3             | 6             | 0           | 2.546684                | -0.175280 | -0.000010 |
| 4             | 6             | 0           | 0.515524                | -1.457736 | 0.000048  |
| 5             | 6             | 0           | 1.895158                | -1.418570 | 0.000026  |
| 6             | 1             | 0           | 3.631172                | -0.134763 | -0.000024 |
| 7             | 1             | 0           | -0.026091               | -2.395704 | 0.000061  |
| 8             | 1             | 0           | 2.465246                | -2.339914 | 0.000031  |
| 9             | 6             | 0           | 1.827938                | 1.006116  | -0.000018 |
| 10            | 1             | 0           | 2.320834                | 1.972063  | -0.000027 |
| 11            | 8             | 0           | -0.197109               | 2.177537  | 0.000072  |
| 12            | 1             | 0           | -1.161411               | 2.025322  | 0.000188  |
| 13            | 7             | 0           | -1.660853               | -0.358485 | -0.000005 |
| 14            | 8             | 0           | -2.179827               | -1.457615 | 0.000018  |
| 15            | 8             | 0           | -2.319296               | 0.688280  | -0.000177 |

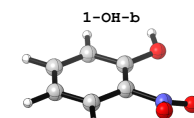

Standard orientation:

| Center Number | Atomic Number | Atomic Type | Coordinates (Angstroms) |           |           |
|---------------|---------------|-------------|-------------------------|-----------|-----------|
|               |               |             | X                       | Y         | Z         |
| 1             | 6             | 0           | 0.444284                | 0.979486  | -0.053209 |
| 2             | 6             | 0           | -0.231561               | -0.248889 | 0.016551  |
| 3             | 6             | 0           | 2.531465                | -0.254081 | 0.032496  |
| 4             | 6             | 0           | 0.457582                | -1.459855 | 0.081016  |
| 5             | 6             | 0           | 1.843050                | -1.468271 | 0.001159  |
| 6             | 1             | 0           | 3.616445                | -0.242650 | 0.040348  |
| 7             | 1             | 0           | -0.115965               | -2.378227 | 0.123317  |
| 8             | 1             | 0           | 2.380553                | -2.406778 | 0.166328  |
| 9             | 6             | 0           | 1.844348                | 0.948797  | -0.050003 |
| 10            | 1             | 0           | 2.387122                | 1.887362  | -0.116022 |
| 11            | 8             | 0           | -0.241351               | 2.133268  | -0.158128 |
| 12            | 1             | 0           | 0.371690                | 2.871768  | -0.272538 |
| 13            | 7             | 0           | -1.691122               | -0.312563 | 0.019486  |
| 14            | 8             | 0           | -2.210140               | -1.334309 | -0.408720 |
| 15            | 8             | 0           | -2.315635               | 0.635209  | 0.461861  |

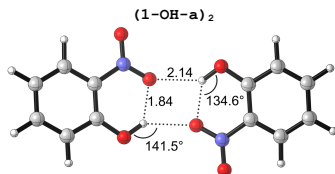

Standard orientation:

| Center Number | Atomic Number | Atomic Type | Coordinates (Angstroms) |           |           |
|---------------|---------------|-------------|-------------------------|-----------|-----------|
|               |               |             | X                       | Y         | Z         |
| 1             | 6             | 0           | -2.958676               | -0.895580 | 0.029750  |
| 2             | 6             | 0           | -3.146661               | 0.501187  | -0.038980 |
| 3             | 6             | 0           | -4.377636               | 1.092842  | 0.279123  |
| 4             | 6             | 0           | -5.441938               | 0.305028  | 0.665203  |
| 5             | 6             | 0           | -5.272825               | -1.087131 | 0.736363  |
| 6             | 6             | 0           | -4.060027               | -1.672872 | 0.426933  |
| 7             | 7             | 0           | -2.071137               | 1.381672  | -0.439304 |
| 8             | 8             | 0           | -1.830315               | -1.556488 | -0.239362 |
| 9             | 8             | 0           | -1.001473               | 0.866595  | -0.783751 |
| 10            | 8             | 0           | -2.249105               | 2.583641  | -0.430024 |
| 11            | 1             | 0           | -1.119820               | -0.949959 | -0.519494 |
| 12            | 1             | 0           | -4.465402               | 2.170229  | 0.209439  |
| 13            | 1             | 0           | -6.395414               | 0.759159  | 0.907586  |
| 14            | 1             | 0           | -6.103640               | -1.717007 | 1.037678  |
| 15            | 1             | 0           | -3.917005               | -2.746514 | 0.480058  |
| 16            | 6             | 0           | 2.958685                | 0.895584  | 0.029643  |
| 17            | 6             | 0           | 3.146649                | -0.501182 | -0.039142 |
| 18            | 6             | 0           | 4.377601                | -1.092873 | 0.278983  |
| 19            | 6             | 0           | 5.441904                | -0.305096 | 0.665137  |
| 20            | 6             | 0           | 5.272814                | 1.087064  | 0.736345  |
| 21            | 6             | 0           | 4.060038                | 1.672839  | 0.426896  |
| 22            | 7             | 0           | 2.071136                | -1.381638 | -0.439554 |
| 23            | 8             | 0           | 1.830352                | 1.556533  | -0.239484 |
| 24            | 8             | 0           | 1.001473                | -0.866542 | -0.783970 |
| 25            | 8             | 0           | 2.249131                | -2.583605 | -0.430376 |
| 26            | 1             | 0           | 1.119830                | 0.950045  | -0.519626 |
| 27            | 1             | 0           | 4.465349                | -2.170259 | 0.209257  |
| 28            | 1             | 0           | 6.395360                | -0.759256 | 0.907540  |
| 29            | 1             | 0           | 6.103630                | 1.716913  | 1.037715  |
| 30            | 1             | 0           | 3.917033                | 2.746481  | 0.480058  |

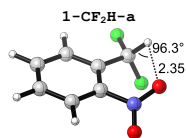

Standard orientation:

| Center Number | Atomic Number | Atomic Type | Coordinates (Angstroms) |           |           |
|---------------|---------------|-------------|-------------------------|-----------|-----------|
|               |               |             | X                       | Y         | Z         |
| 1             | 6             | 0           | -0.285248               | 0.592425  | -0.139935 |
| 2             | 6             | 0           | 0.101660                | 1.930586  | -0.103190 |
| 3             | 6             | 0           | 2.066858                | -0.036820 | 0.063546  |
| 4             | 6             | 0           | 1.445833                | 2.286723  | 0.000775  |
| 5             | 1             | 0           | -0.663752               | 2.696147  | -0.149321 |
| 6             | 6             | 0           | 2.429026                | 1.306534  | 0.087438  |
| 7             | 1             | 0           | 2.802139                | -0.829426 | 0.135480  |
| 8             | 1             | 0           | 1.719746                | 3.336385  | 0.021792  |
| 9             | 1             | 0           | 3.474891                | 1.580345  | 0.173648  |
| 10            | 6             | 0           | -1.760140               | 0.243940  | -0.192113 |
| 11            | 1             | 0           | -2.060116               | -0.321290 | -1.072521 |
| 12            | 9             | 0           | -2.497597               | 1.390349  | -0.152797 |
| 13            | 9             | 0           | -2.087654               | -0.472671 | 0.919061  |
| 14            | 6             | 0           | 0.725948                | -0.371625 | -0.060962 |
| 15            | 7             | 0           | 0.411645                | -1.811020 | -0.140297 |
| 16            | 8             | 0           | 1.207542                | -2.588130 | 0.349926  |
| 17            | 8             | 0           | -0.611390               | -2.131207 | -0.719517 |

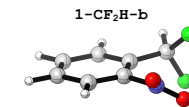

Standard orientation:

| Center Number | Atomic Number | Atomic Type | Coordinates (Angstroms) |           |           |
|---------------|---------------|-------------|-------------------------|-----------|-----------|
|               |               |             | X                       | Y         | Z         |
| 1             | 6             | 0           | 0.206722                | -0.778992 | 0.068458  |
| 2             | 6             | 0           | 1.334029                | -1.597211 | 0.096957  |
| 3             | 6             | 0           | 1.686234                | 1.156391  | -0.098380 |
| 4             | 6             | 0           | 2.618905                | -1.062577 | -0.000283 |
| 5             | 1             | 0           | 1.203618                | -2.669869 | 0.205724  |
| 6             | 6             | 0           | 2.795624                | 0.313807  | -0.094581 |
| 7             | 1             | 0           | 1.792324                | 2.233041  | -0.162923 |
| 8             | 1             | 0           | 3.478413                | -1.723701 | 0.012987  |
| 9             | 1             | 0           | 3.791315                | 0.737825  | -0.161605 |
| 10            | 6             | 0           | -1.137045               | -1.447039 | 0.233163  |
| 11            | 1             | 0           | -1.023723               | -2.462030 | 0.620872  |
| 12            | 9             | 0           | -1.811766               | -1.529766 | -0.947021 |
| 13            | 9             | 0           | -1.924035               | -0.753947 | 1.105571  |
| 14            | 6             | 0           | 0.417443                | 0.599896  | -0.033668 |
| 15            | 7             | 0           | -0.712067               | 1.540753  | -0.102708 |
| 16            | 8             | 0           | -1.694828               | 1.198356  | -0.730741 |
| 17            | 8             | 0           | -0.576014               | 2.620047  | 0.449109  |

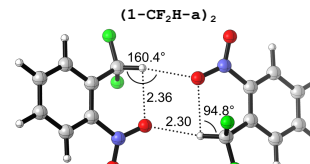

Standard orientation:

| Center Number | Atomic Number | Atomic Type | Coordinates (Angstroms) |           |           |
|---------------|---------------|-------------|-------------------------|-----------|-----------|
|               |               |             | X                       | Y         | Z         |
| 1             | 6             | 0           | -2.969276               | -0.431779 | 0.308858  |
| 2             | 6             | 0           | -4.025723               | -1.286783 | 0.616095  |
| 3             | 6             | 0           | -4.455076               | 0.762388  | -1.221897 |
| 4             | 6             | 0           | -5.271928               | -1.136346 | 0.008719  |
| 5             | 1             | 0           | -3.864930               | -2.069848 | 1.347253  |
| 6             | 6             | 0           | -5.490417               | -0.111662 | -0.906732 |
| 7             | 1             | 0           | -4.586927               | 1.575051  | -1.926247 |
| 8             | 1             | 0           | -6.075316               | -1.820323 | 0.261754  |
| 9             | 1             | 0           | -6.460439               | 0.011201  | -1.375967 |
| 10            | 6             | 0           | -1.642958               | -0.595634 | 1.025841  |
| 11            | 1             | 0           | -0.813920               | -0.887441 | 0.381747  |
| 12            | 9             | 0           | -1.775369               | -1.532125 | 2.005165  |
| 13            | 9             | 0           | -1.327366               | 0.579589  | 1.648472  |
| 14            | 6             | 0           | -3.215418               | 0.581228  | -0.624083 |
| 15            | 7             | 0           | -2.143641               | 1.501793  | -1.044125 |
| 16            | 8             | 0           | -2.470209               | 2.598337  | -1.454368 |
| 17            | 8             | 0           | -0.996217               | 1.092390  | -0.983910 |
| 18            | 1             | 0           | 0.814908                | 0.890365  | 0.377837  |
| 19            | 6             | 0           | 1.643470                | 0.599944  | 1.023146  |
| 20            | 6             | 0           | 2.969835                | 0.432585  | 0.307058  |
| 21            | 6             | 0           | 3.215215                | -0.583448 | -0.622745 |
| 22            | 6             | 0           | 4.027033                | 1.287465  | 0.612039  |
| 23            | 6             | 0           | 4.454810                | -0.767608 | -1.219767 |
| 24            | 6             | 0           | 5.273213                | 1.134027  | 0.005365  |
| 25            | 1             | 0           | 3.866831                | 2.072830  | 1.340855  |
| 26            | 6             | 0           | 5.490898                | 0.106458  | -0.907022 |
| 27            | 1             | 0           | 4.586045                | -1.582559 | -1.921605 |
| 28            | 1             | 0           | 6.077201                | 1.817993  | 0.256512  |
| 29            | 1             | 0           | 6.460883                | -0.018640 | -1.375744 |
| 30            | 7             | 0           | 2.142575                | -1.504261 | -1.039963 |
| 31            | 8             | 0           | 2.468010                | -2.602775 | -1.445780 |
| 32            | 8             | 0           | 0.995645                | -1.093070 | -0.982169 |
| 33            | 9             | 0           | 1.776481                | 1.539433  | 1.999474  |
| 34            | 9             | 0           | 1.326613                | -0.573053 | 1.649420  |

### 5.5.3. The $\Delta\bar{\chi}$ - Electronegativity Equalization Relationship

The Allen scale of electronegativity (units  $\text{eV e}^{-1}$ ) was devised by averaging atomic  $s$ - and  $p$ -level energies obtained from photoelectron spectroscopy.<sup>15</sup> The Allen scale offers a good estimate of how the change in the average electron binding energy,  $\Delta\bar{\chi}$ ,<sup>16</sup> relates to the classical Pauling electronegativity scale (Pauling units = PU, Figure S42).<sup>17</sup> If we choose to let the linear regression in Figure S42 intersect the origin, i.e. that zero PU = zero  $\text{eV e}^{-1}$ , the coefficient of determination,  $r^2$ , becomes 0.995, and the conversion reads as  $1 \text{ PU} = 6.06 \text{ eV e}^{-1} = 585 \text{ kJ/mol} = 140 \text{ kcal/mol}$ . By this relationship, the  $\Delta\bar{\chi}$ -term expresses the binding energy change corresponding to a certain degree of “electronegativity equalization,” over a chemical transformation. For a more detailed account of  $\Delta\bar{\chi}$  and its uses see references<sup>16</sup> and<sup>18</sup>.

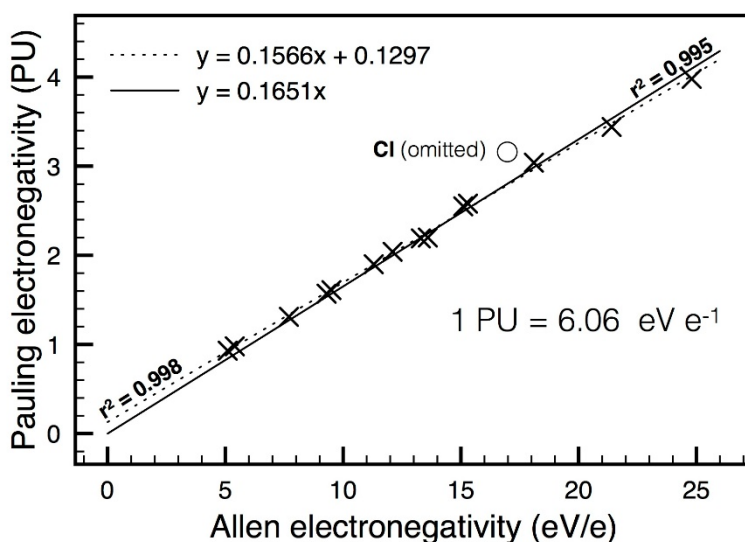

**Figure S42.** Allen electronegativity plotted against Pauling electronegativity for the first two rows of the periodic table; He, Ar and Cl omitted.

**Table S16.** Atomic charge on selected atoms and change upon bond formation.<sup>a</sup>

| Species                                                                    | Atom X in HB donor X-H | H    | HB acceptor |
|----------------------------------------------------------------------------|------------------------|------|-------------|
| H <sub>2</sub> O                                                           | -1.17                  | 0.59 | -1.17       |
| (H <sub>2</sub> O) <sub>2</sub>                                            | -1.22                  | 0.63 | -1.18       |
| 2 H <sub>2</sub> O → (H <sub>2</sub> O) <sub>2</sub>                       | -0.05                  | 0.04 | -0.01       |
| <b>1-OH-b</b>                                                              | -1.15                  | 0.61 | -0.46       |
| <b>1-OH-a</b>                                                              | -1.21                  | 0.67 | -0.53       |
| ( <b>1-OH-a</b> ) <sub>2</sub>                                             | -1.22                  | 0.68 | -0.55       |
| <b>1-OH-b</b> → <b>1-OH-a</b>                                              | -0.06                  | 0.01 | -0.08       |
| 2 <b>1-OH-a</b> → ( <b>1-OH-a</b> ) <sub>2</sub>                           | -0.01                  | 0.07 | -0.01       |
| <b>1-CF<sub>2</sub>H-b</b>                                                 | 1.29                   | 0.06 | -0.45       |
| <b>1-CF<sub>2</sub>H-a</b>                                                 | 1.25                   | 0.11 | -0.48       |
| ( <b>1-CF<sub>2</sub>H-a</b> ) <sub>2</sub>                                | 1.18                   | 0.13 | -0.49       |
| <b>1-CF<sub>2</sub>H-b</b> → <b>1-CF<sub>2</sub>H-a</b>                    | -0.03                  | 0.05 | -0.03       |
| 2 <b>1-CF<sub>2</sub>H-a</b> → ( <b>1-CF<sub>2</sub>H-a</b> ) <sub>2</sub> | -0.08                  | 0.02 | -0.01       |
| DMF                                                                        | -                      | -    | -1.22       |
| <b>2-CF<sub>2</sub>H</b>                                                   | 1.24                   | 0.07 | -           |
| [ <b>2-CF<sub>2</sub>H</b> ⋯DMF]                                           | 1.20                   | 0.11 | -1.24       |
| <b>2-CF<sub>2</sub>H</b> + DMF → [ <b>2-CF<sub>2</sub>H</b> ⋯DMF]          | -0.05                  | 0.05 | -0.02       |
| <b>2-OH</b>                                                                | -1.17                  | 0.60 | -           |
| [ <b>2-OH</b> ⋯DMF]                                                        | -1.23                  | 0.66 | -1.24       |
| <b>2-OH</b> + DMF → [ <b>2-OH</b> ⋯DMF]                                    | -0.06                  | 0.06 | -0.02       |
| PhCH <sub>3</sub> <sup>b</sup>                                             | 0.04                   | 0.01 | -           |

<sup>a</sup> QTAIM-charges derived from topological analyses of M06-2X/aug-cc-pVTZ electron densities.<sup>19</sup> Integrations were performed on 18.5 μÅ<sup>3</sup> resolution grids.<sup>20</sup> <sup>b</sup> C and H charges on the methyl group in toluene given for reference when comparing with NMR-shielding measurements.

## 6. X-ray Crystallography Studies

### 6.1. CSD Structure Search and Data Analysis

All structure parameters were retrieved from the CSD using the fragment defining query tool of ConQuest. X $\cdots$ H distances were set to  $\leq 2.6$  Å and  $\leq 2.7$  Å, corresponding to the sum of the van der Waals radii of O $\cdots$ H and N $\cdots$ H, respectively. The data for O $\cdots$ H distances and C–H $\cdots$ O angles of methyl-containing compounds were obtained using the automatic export function of ConQuest. For difluoromethyl-containing compounds, the CF<sub>2</sub>H $\cdots$ O distances and F<sub>2</sub>C–H $\cdots$ O angles were measured manually using ORTEP (version 2.02) based on the corresponding .cif files. Manual inspection of the data sets allowed for consideration of possible disorder of the CF<sub>2</sub>H groups. In some cases, the disorder had not been modeled sufficiently to allow for high accuracy measurements. Such structures were refined again to obtain reliable CF<sub>2</sub>H $\cdots$ X (X = N, O) distances. Details of the re-refinement as well as the corresponding .res files are provided in Section 6.2.5.



**Table S17.** Summary of short F<sub>2</sub>C–H···O bond distances and the corresponding bond angles found in CSD.

| #  | CSD Refcode | F <sub>2</sub> CH···O Bond distance [Å] | F <sub>2</sub> C–H···O Bond angle [°] | #  | CSD Refcode | CF <sub>2</sub> CH···O Bond distance [Å] | F <sub>2</sub> C–H···O Bond angle [°] |
|----|-------------|-----------------------------------------|---------------------------------------|----|-------------|------------------------------------------|---------------------------------------|
| 1  | PUMYUN      | 2.490                                   | 99.44                                 | 45 | MAPWOQ      | 2.664                                    | 95.85                                 |
| 2  | ADIGEA      | 2.462                                   | 103.67                                | 46 | SASHUR      | 2.203                                    | 106.77                                |
| 3  | APITID      | 2.430                                   | 90.48                                 | 47 | SASHUR      | 2.213                                    | 105.76                                |
| 4  | APITJO      | 2.237                                   | 126.13                                | 48 | TELRIX      | 2.684                                    | 91.74                                 |
| 5  | AZELIB      | 2.626                                   | 98.91                                 | 49 | QUXCUI      | 2.510                                    | 110.55                                |
| 6  | GEJRIK      | 2.524                                   | 98.85                                 | 50 | TUWVEM      | 2.585                                    | 98.36                                 |
| 7  | LUKMOI      | 2.510                                   | 93.54                                 | 51 | TUWVEM      | 2.500                                    | 103.25                                |
| 8  | ZIJFAB      | 2.622                                   | 112.12                                | 52 | TUWVEM      | 2.470                                    | 103.04                                |
| 9  | BEBTUY      | 2.376                                   | 117.16                                | 53 | FIQXEI      | 2.540                                    | 129.10                                |
| 10 | IQOSIR      | 2.556                                   | 120.01                                | 54 | YUHGIT      | 2.579                                    | 103.44                                |
| 11 | SEPWEQ      | 2.457                                   | 98.21                                 | 55 | YAPMUY      | 2.694                                    | 109.98                                |
| 12 | SOSBOS      | 2.529                                   | 99.26                                 | 56 | YAWTIB      | 2.516                                    | 103.69                                |
| 13 | SOSBOS      | 2.544                                   | 99.46                                 | 57 | ZAPPIR      | 2.513                                    | 103.15                                |
| 14 | TUZWUG      | 2.588                                   | 90.04                                 | 58 | WEFHAS      | 2.352                                    | 152.78                                |
| 15 | XOFTIX      | 2.659                                   | 98.19                                 | 59 | NAYPUZ      | 2.606                                    | 97.16                                 |
| 16 | XOFTIX      | 2.529                                   | 96.71                                 | 60 | HIKMIX      | 2.685                                    | 95.02                                 |
| 17 | YESVUO      | 2.692                                   | 103.48                                | 61 | VEXNOC      | 2.361                                    | 122.68                                |
| 18 | AZEPOL      | 2.081                                   | 138.91                                | 62 | MOGLAV      | 2.238                                    | 116.99                                |
| 19 | AZEPOL      | 2.323                                   | 125.24                                | 63 | MOGLOJ      | 2.139                                    | 121.48                                |
| 20 | GEJRIK      | 2.221                                   | 127.30                                | 64 | POYLIZ      | 2.639                                    | 104.18                                |
| 21 | JIXQAJ      | 2.226                                   | 126.47                                | 65 | RIDCOY      | 2.658                                    | 131.72                                |
| 22 | TIJZOC      | 2.310                                   | 118.65                                | 66 | WOHJAG      | 2.167                                    | 132.30                                |
| 23 | HALNIT      | 2.261                                   | 108.53                                | 67 | LUVJOC      | 2.229                                    | 119.44                                |
| 24 | HALNIT      | 2.243                                   | 110.85                                | 68 | LUVJOC      | 2.390                                    | 110.49                                |
| 25 | HALNIT      | 2.414                                   | 159.39                                | 69 | ZECBIU      | 2.677                                    | 91.57                                 |
| 26 | QEZLUE      | 2.392                                   | 111.18                                | 70 | APIVAX      | 2.347                                    | 92.36                                 |
| 27 | XOCVIW      | 2.128                                   | 130.00                                | 71 | AZEPUR      | 2.201                                    | 131.31                                |
| 28 | XOCVIW      | 2.194                                   | 124.18                                | 72 | XIRXOM      | 2.564                                    | 90.61                                 |
| 29 | XOCVIW      | 2.200                                   | 123.05                                | 73 | XIRXUS      | 2.654                                    | 92.34                                 |
| 30 | XOCVIW      | 2.145                                   | 127.67                                | 74 | IHEPES      | 2.500                                    | 96.84                                 |
| 31 | QUWQOQ      | 2.509                                   | 98.46                                 | 75 | JIXQEN      | 2.318                                    | 129.61                                |
| 32 | BAXCIN      | 2.277                                   | 113.15                                |    |             |                                          |                                       |
| 33 | BAXCIN      | 2.344                                   | 109.54                                |    |             |                                          |                                       |
| 34 | DIDZUL      | 2.386                                   | 139.27                                |    |             |                                          |                                       |
| 35 | ELUGUO      | 2.265                                   | 126.02                                |    |             |                                          |                                       |
| 36 | HALNOZ      | 2.292                                   | 106.41                                |    |             |                                          |                                       |
| 37 | SEFFIU      | 2.217                                   | 128.27                                |    |             |                                          |                                       |
| 38 | SEFFIU      | 2.419                                   | 125.43                                |    |             |                                          |                                       |
| 39 | CEFZAP      | 2.527                                   | 96.14                                 |    |             |                                          |                                       |
| 40 | GAPYIG      | 2.403                                   | 95.67                                 |    |             |                                          |                                       |
| 41 | IFOZUZ      | 2.261                                   | 104.69                                |    |             |                                          |                                       |
| 42 | MAPWEG      | 2.481                                   | 100.78                                |    |             |                                          |                                       |
| 43 | MAPWEG      | 2.654                                   | 93.23                                 |    |             |                                          |                                       |
| 44 | MAPWEG      | 2.535                                   | 96.36                                 |    |             |                                          |                                       |

**Table S18.** Selected short H<sub>2</sub>C–H···O bond distances and the corresponding bond angles found in CSD.

| #  | CSD Refcode | H <sub>2</sub> CH···O Bond distance [Å] | H <sub>2</sub> C–H···O Bond angle [°] | #  | CSD Refcode | H <sub>2</sub> CH···O Bond distance [Å] | H <sub>2</sub> C–H···O Bond angle [°] |
|----|-------------|-----------------------------------------|---------------------------------------|----|-------------|-----------------------------------------|---------------------------------------|
| 1  | FUVSEW      | 2.677                                   | 134.691                               | 45 | NEMCAK      | 2.466                                   | 105.57                                |
| 2  | GUNRAK      | 2.627                                   | 142.957                               | 46 | NEQSEI      | 2.391                                   | 114.026                               |
| 3  | RUMFEM      | 2.589                                   | 144.421                               | 47 | NIFMUM      | 2.626                                   | 98.682                                |
| 4  | ALEYAS      | 2.593                                   | 153.641                               | 48 | NIYKEN      | 2.433                                   | 116.224                               |
| 5  | BIFNOU      | 2.703                                   | 132.607                               | 49 | OBOGAO      | 2.431                                   | 130.585                               |
| 6  | CENBIH      | 2.705                                   | 117.813                               | 50 | ODIDEM      | 2.626                                   | 170.894                               |
| 7  | DIKWUQ      | 2.638                                   | 161.969                               | 51 | OGAKOX      | 2.66                                    | 114.117                               |
| 8  | DOPKAU      | 2.546                                   | 124.38                                | 52 | OHESUR      | 2.669                                   | 142.08                                |
| 9  | DOYPEM      | 2.642                                   | 108.989                               | 53 | PIBQAU      | 2.506                                   | 124.347                               |
| 10 | ENOYEM      | 2.511                                   | 154.161                               | 54 | QAZLIM      | 2.396                                   | 156.438                               |
| 11 | EVADOU      | 2.706                                   | 121.723                               | 55 | RASXEQ      | 2.226                                   | 145.709                               |
| 12 | EZOJIN      | 2.394                                   | 106.244                               | 56 | REJDOB      | 2.285                                   | 126.62                                |
| 13 | FEWMEA      | 2.658                                   | 136.262                               | 57 | SABWOI      | 2.636                                   | 115.886                               |
| 14 | FIHQOC      | 2.316                                   | 126.142                               | 58 | SEQWOA01    | 2.648                                   | 114.275                               |
| 15 | FILYOP      | 2.643                                   | 138.349                               | 59 | SOWZEK      | 2.415                                   | 134.142                               |
| 16 | GIVQOS      | 2.661                                   | 115.982                               | 60 | SUJCOR      | 2.712                                   | 137.784                               |
| 17 | HOCWOM      | 2.639                                   | 159.287                               | 61 | TIDKOH      | 2.448                                   | 122.532                               |
| 18 | HOTSOZ      | 2.705                                   | 113.6                                 | 62 | TOKNOY      | 2.299                                   | 143.072                               |
| 19 | ICAGEA      | 2.567                                   | 153.007                               | 63 | TURGUI      | 2.415                                   | 122.859                               |
| 20 | INIBUC      | 2.342                                   | 121.979                               | 64 | UGALEV      | 2.416                                   | 159.616                               |
| 21 | IQETON      | 2.54                                    | 114.67                                | 65 | VEYYEF      | 2.518                                   | 173.889                               |
| 22 | IVUPAR      | 2.45                                    | 113.544                               | 66 | VOZYIU      | 2.669                                   | 98.373                                |
| 23 | JIVJOO      | 2.498                                   | 148.28                                | 67 | WEVFUZ      | 2.56                                    | 149.426                               |
| 24 | JIXKEG      | 2.471                                   | 112.903                               | 68 | XALHEZ      | 2.454                                   | 123.188                               |
| 25 | KANDOU01    | 2.394                                   | 122.658                               | 69 | XURRIL      | 2.486                                   | 120.306                               |
| 26 | KAWLEA      | 2.581                                   | 135.566                               | 70 | YONKIW      | 2.348                                   | 124.862                               |
| 27 | KEDSUI      | 2.627                                   | 118.121                               | 71 | YUSJAX      | 2.664                                   | 111.804                               |
| 28 | KISCUL      | 2.511                                   | 103.163                               | 72 | ZUZRUH      | 2.546                                   | 121.286                               |
| 29 | LACFAW02    | 2.514                                   | 126.216                               | 73 | RUJQUK      | 2.714                                   | 109.769                               |
| 30 | LEJXOP      | 2.301                                   | 124.289                               | 74 | WUYXIZ      | 2.488                                   | 142.828                               |
| 31 | LIFWOM      | 2.669                                   | 117.31                                | 75 | YUTREM      | 2.36                                    | 125.188                               |
| 32 | LILVAF      | 2.49                                    | 121.648                               |    |             |                                         |                                       |
| 33 | LIYDEC      | 2.593                                   | 122.966                               |    |             |                                         |                                       |
| 34 | LOPHUU      | 2.452                                   | 123.233                               |    |             |                                         |                                       |
| 35 | LOTWOG      | 2.652                                   | 128.659                               |    |             |                                         |                                       |
| 36 | LUKKOS      | 2.512                                   | 119.49                                |    |             |                                         |                                       |
| 37 | LUNKEL      | 2.507                                   | 120.015                               |    |             |                                         |                                       |
| 38 | MEJCUA      | 2.508                                   | 128.097                               |    |             |                                         |                                       |
| 39 | MEPYEM      | 2.564                                   | 159.772                               |    |             |                                         |                                       |
| 40 | MIGHEQ      | 2.712                                   | 109.613                               |    |             |                                         |                                       |
| 41 | MOKKOM      | 2.695                                   | 136.898                               |    |             |                                         |                                       |
| 42 | MUDTIP      | 2.586                                   | 143.962                               |    |             |                                         |                                       |
| 43 | NAJCOS      | 2.598                                   | 93.003                                |    |             |                                         |                                       |
| 44 | NARQII      | 2.314                                   | 159.104                               |    |             |                                         |                                       |

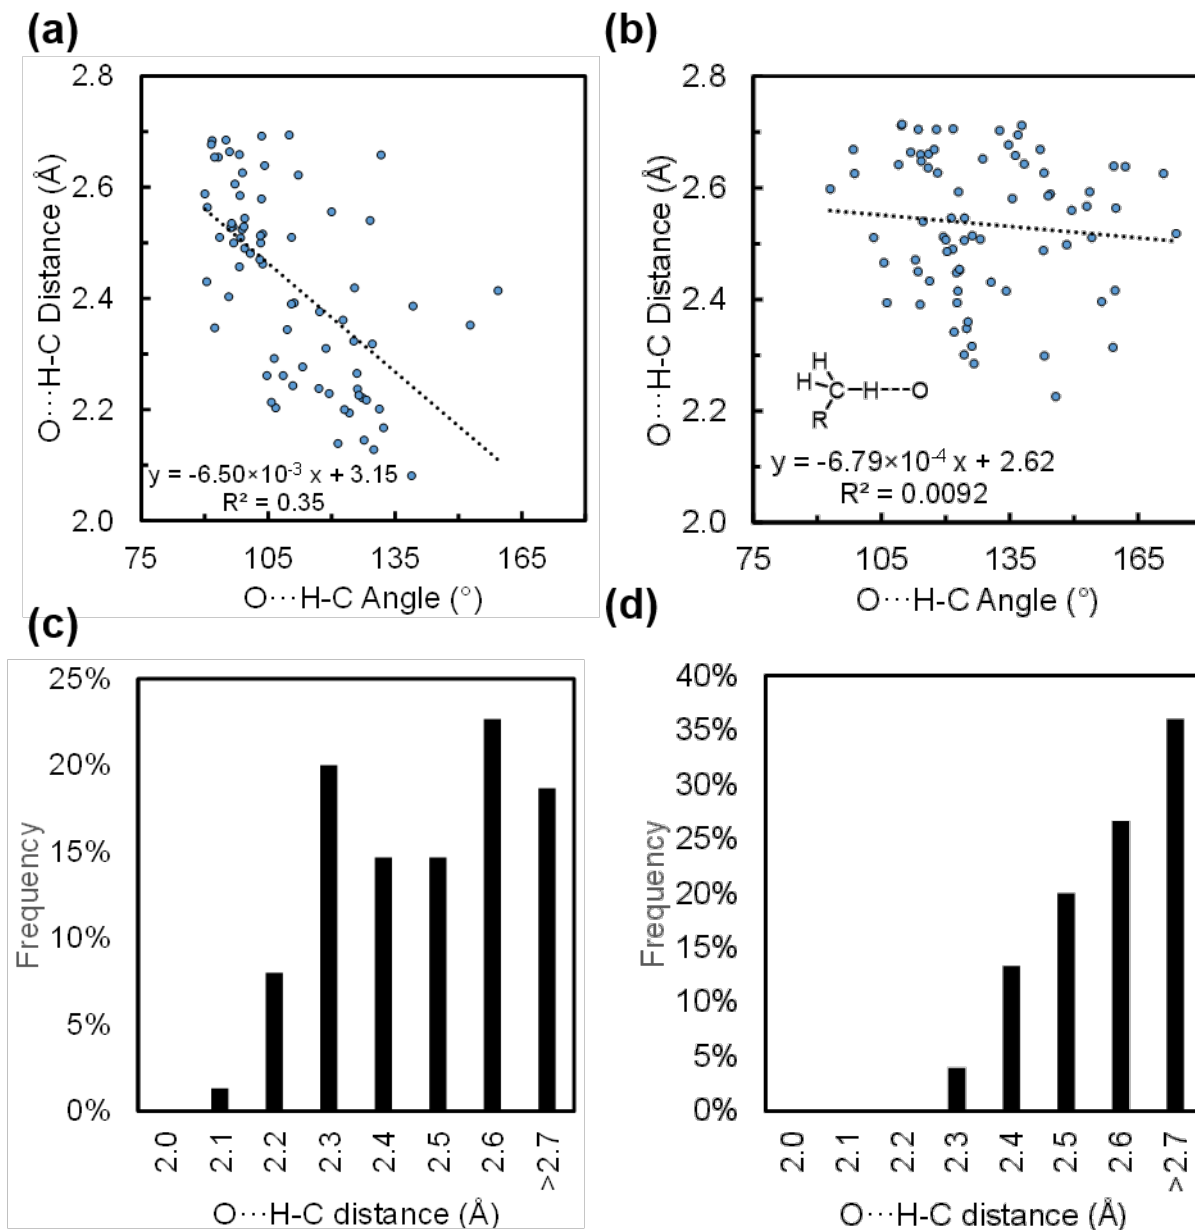

**Figure S43.** A) Correlation between short  $F_2C-H\cdots O$  bond distances and the corresponding  $F_2C-H\cdots O$  bond angles; b) Correlation between short  $H_2C-H\cdots O$  bond distances and the corresponding  $H_2C-H\cdots O$  bond angles; C) Histogram showing the distribution of short  $F_2C-H\cdots O$  distances; D) Histogram showing the distribution of short  $H_2C-H\cdots O$  distances.

A one-tailed Student  $t$ -test was performed on the bond angle/distance correlations to determine the significance of the results. A  $t$  value for the correlation coefficient ( $r$ ) was determined using equation S2 for a population of size  $n$ .

$$t = r \sqrt{\frac{n-2}{1-r^2}} \quad \text{Eq. (S2)}$$

For the  $F_2C-H\cdots O$  correlation,  $t = 6.27$  corresponding to a  $p$ -value of  $1.1 \times 10^{-8}$ . For the  $H_2C-H\cdots O$  correlation,  $t = 0.82$  corresponding to a  $p$ -value of 0.21. These results indicate a significant correlation ( $r > 0$ ) between the

bond distances and angles for F<sub>2</sub>C–H···O interactions, but no significant correlation ( $r = 0$ ) for H<sub>2</sub>C–H···O interactions. These results are consistent with the proposed weak F<sub>2</sub>C–H···O bonding interactions but negligible H<sub>2</sub>C–H···O interactions.

## 6.2. Experimental Details of the Crystal Structure Refinement

Single crystals of **1-CF<sub>2</sub>H**, **1-OH**, and **5-CF<sub>2</sub>H** were mounted on loops with Paratone-N oil and transferred to an N<sub>2</sub> cold stream (100 K) with a KRYO-FLEX low-temperature apparatus. The crystal of **2-CF<sub>2</sub>H** was mounted at low temperature and transferred to the N<sub>2</sub> cold stream with a dry ice device. Data sets were collected at 100 K. Data collection was carried out using a Bruker SMART APEX CCD X-ray diffractometer equipped with a Bruker APEX2 CCD detector with Mo K<sub>α</sub> radiation ( $\lambda = 0.71073$  Å) controlled by the APEX2 software package.<sup>21</sup> Reduction of the data of **1-CF<sub>2</sub>H**, **1-OH**, and **5-CF<sub>2</sub>H** was performed with SAINT.<sup>22</sup> Empirical absorption corrections were calculated with SADABS.<sup>23</sup> Reduction of the data of **2-CF<sub>2</sub>H** was performed with CELL\_NOW and empirical absorption correction was applied with TWINABS.<sup>23</sup> The space groups were determined by XPREP<sup>22</sup> through analysis of metric symmetry and systematic absences. The structures were solved with SHELXT.<sup>24</sup> All structures were refined by full-matrix least-squares based on  $F^2$  using SHELXL (Re. 789).<sup>25</sup> Each structure was checked for higher symmetry using PLATON.<sup>26</sup> All non-hydrogen atoms were located and refined anisotropically. If not otherwise noted, the isotropic displacement parameters of the hydrogen atoms were fixed to 1.2 times the  $U_{eq}$  value of the atoms, to which they are attached. Distance and anisotropic displacement parameter restraints were applied to disordered atoms. Figures were generated using the program ORTEP and Mercury.<sup>27</sup> See Figures S44-47 and Tables S19-38 below for crystallographic data and refinement details. Specific details and discussion about refinement, including disorder, are provided below for selected structures.

### 6.2.1. *o*-Nitro- $\alpha,\alpha$ -difluorotoluene (**1-CF<sub>2</sub>H**)

*o*-Nitro- $\alpha,\alpha$ -difluorotoluene crystallized in the monoclinic space group  $P2_1/c$  with one molecule in the asymmetric unit. As governed by the symmetry operations of the space group, the densest packing of the layers is achieved by a glide plane and a twofold screw-axis rotation. The distance between the two indicated aromatic rings was determined to be 3.472(42) Å (see Figure S44 B).

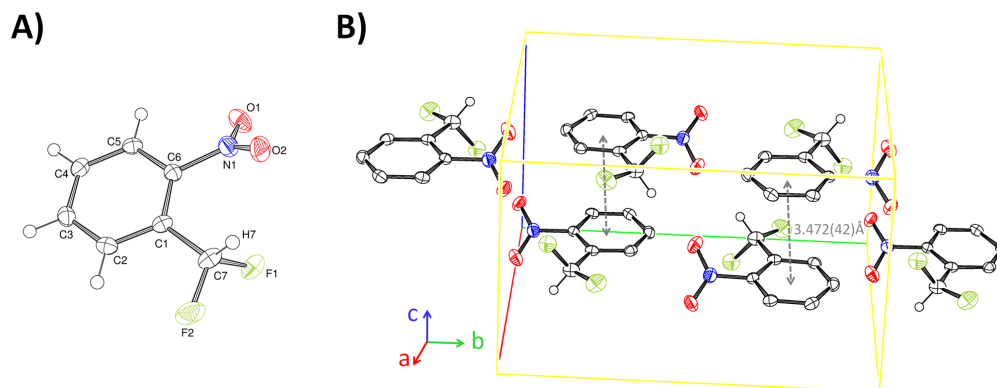

**Figure S44.** ORTEP representation of 1-difluoromethyl-2-nitro-benzene (**A**). (**B**) shows the packing of the unit cell, hydrogen atoms, except H7, were deleted for clarity. Thermal ellipsoids are set at 50% probability.

Coordinates for H7, the hydrogen atom of the CF<sub>2</sub>H group, were taken from the difference Fourier synthesis. H7 was subsequently refined semi-freely with the  $U_{iso}$  value constrained to 1.2 times the  $U_{eq}$  value of the carbon atom to which it is attached. The relatively high residual electron density of 1.21 of H7 was unexpected.

We searched the CSD for other examples of CF<sub>2</sub>H-containing molecules in order to compare the residual electron density of the H-atoms. Because of the limited availability of .cif files containing .res- and .hkl-files necessary for this comparison a thorough analysis was not possible. It is conceivable that the relatively high residual electron density of H7 is associated with the blue-shifted nature of the hydrogen bonding interaction. In order to pursue this hypothesis, we synthesized and crystallized *p*-bromo- $\alpha,\alpha$ -difluorotoluene (**2-CF<sub>2</sub>H**), a CF<sub>2</sub>H containing compound that does not show hydrogen bonding interactions. Thorough analysis of the residual electron density of the CF<sub>2</sub>H hydrogen atom was impeded by a statistical disorder of the CF<sub>2</sub>H moiety and the bromide (see §6.2.3.). To avoid this issue we synthesized and crystallized 1-benzyloxy-4-(difluoromethyl)benzene (**5-CF<sub>2</sub>H**, see §6.2.4.). Indeed, the crystal did not exhibit disorder. In contrast to the residual electron density of the CF<sub>2</sub>H hydrogen atom in **1-CF<sub>2</sub>H**, the residual electron density of this CF<sub>2</sub>H hydrogen atom was similar to those of other hydrogen atoms in the structure. Thus, the relatively high residual electron density of the CF<sub>2</sub>H hydrogen atom in **1-CF<sub>2</sub>H** is unique. At the moment, we do not have an explanation for this phenomenon.

**Table S19.** Crystal data and structure refinement for *o*-nitro- $\alpha,\alpha$ -difluorotoluene (**1-CF<sub>2</sub>H**).

|                                              |                                                              |
|----------------------------------------------|--------------------------------------------------------------|
| CCDC number                                  | 1552715                                                      |
| Empirical formula                            | C <sub>7</sub> H <sub>5</sub> F <sub>2</sub> NO <sub>2</sub> |
| Formula weight                               | 173.12                                                       |
| Temperature                                  | 100(2) K                                                     |
| Wavelength                                   | 0.71073 Å                                                    |
| Crystal system                               | Monoclinic                                                   |
| Space group                                  | <i>P</i> 2 <sub>1</sub> / <i>c</i>                           |
| Unit cell dimensions                         |                                                              |
| a = 8.007(2) Å                               |                                                              |
| b = 12.905(3) Å                              | $\beta$ = 113.188(4)°                                        |
| c = 7.3562(18) Å                             |                                                              |
| Volume                                       | 698.7(3) Å <sup>3</sup>                                      |
| Z                                            | 4                                                            |
| Density (calculated)                         | 1.646 Mg/m <sup>3</sup>                                      |
| Absorption coefficient                       | 0.155 mm <sup>-1</sup>                                       |
| F(000)                                       | 352                                                          |
| Crystal size                                 | 0.250 x 0.200 x 0.070 mm <sup>3</sup>                        |
| Theta range for data collection              | 2.768 to 28.281°                                             |
| Index ranges                                 | -10 ≤ h ≤ 10, -17 ≤ k ≤ 17, -9 ≤ l ≤ 9                       |
| Reflections collected                        | 12289                                                        |
| Independent reflections                      | 1728 [R(int) = 0.0521]                                       |
| Completeness to theta = 25.242°              | 100.0 %                                                      |
| Absorption correction                        | Semi-empirical from equivalents                              |
| Max. and min. transmission                   | 0.7461 and 0.6422                                            |
| Refinement method                            | Full-matrix least-squares on <i>F</i> <sup>2</sup>           |
| Data / restraints / parameters               | 1728 / 0 / 112                                               |
| Goodness-of-fit on <i>F</i> <sup>2</sup>     | 1.089                                                        |
| Final R indices [ <i>I</i> > 2σ( <i>I</i> )] | R1 = 0.0407, wR2 = 0.1197                                    |
| R indices (all data)                         | R1 = 0.0541, wR2 = 0.1279                                    |
| Largest diff. peak and hole                  | 0.657 and -0.288 e.Å <sup>-3</sup>                           |

**Table S20.** Atomic coordinates ( $\times 10^4$ ) and equivalent isotropic displacement parameters ( $\text{\AA}^2 \times 10^3$ ) for *o*-nitro- $\alpha,\alpha$ -difluorotoluene (**1-CF<sub>2</sub>H**).  $U(\text{eq})$  is defined as one third of the trace of the orthogonalized  $U_{ij}$  tensor.

|      | x       | y       | z       | U(eq) |
|------|---------|---------|---------|-------|
| F(1) | 3973(1) | 6045(1) | 1539(2) | 34(1) |
| O(1) | 8735(2) | 4982(1) | 2870(2) | 32(1) |
| N(1) | 7794(2) | 5451(1) | 3571(2) | 26(1) |
| C(1) | 6330(2) | 7170(1) | 3427(2) | 18(1) |
| F(2) | 3253(1) | 7410(1) | 2829(2) | 40(1) |
| O(2) | 6910(2) | 5020(1) | 4381(2) | 33(1) |
| C(2) | 6497(2) | 8241(1) | 3468(2) | 21(1) |
| C(3) | 8120(2) | 8705(1) | 3636(2) | 22(1) |
| C(4) | 9583(2) | 8106(1) | 3750(2) | 22(1) |
| C(5) | 9445(2) | 7037(1) | 3701(2) | 20(1) |
| C(6) | 7839(2) | 6585(1) | 3556(2) | 18(1) |
| C(7) | 4541(2) | 6682(1) | 3168(3) | 26(1) |

**Table S21.** Bond distances [ $\text{\AA}$ ] and angles [ $^\circ$ ] for *o*-nitro- $\alpha,\alpha$ -difluorotoluene (**1-CF<sub>2</sub>H**).

| Bond distance ( $\text{\AA}$ ) |            | Bond angle ( $^\circ$ ) |            | Bond angle ( $^\circ$ ) |            |
|--------------------------------|------------|-------------------------|------------|-------------------------|------------|
| F(1)-C(7)                      | 1.375(2)   | O(2)-N(1)-O(1)          | 123.32(15) | C(4)-C(5)-H(5)          | 120.4      |
| O(1)-N(1)                      | 1.2269(18) | O(2)-N(1)-C(6)          | 118.59(14) | C(5)-C(6)-C(1)          | 122.20(14) |
| N(1)-O(2)                      | 1.2242(18) | O(1)-N(1)-C(6)          | 117.95(13) | C(5)-C(6)-N(1)          | 116.61(13) |
| N(1)-C(6)                      | 1.464(2)   | C(2)-C(1)-C(6)          | 117.61(13) | C(1)-C(6)-N(1)          | 121.18(13) |
| C(1)-C(2)                      | 1.389(2)   | C(2)-C(1)-C(7)          | 119.83(14) | F(2)-C(7)-F(1)          | 106.87(13) |
| C(1)-C(6)                      | 1.396(2)   | C(6)-C(1)-C(7)          | 122.51(14) | F(2)-C(7)-C(1)          | 110.70(14) |
| C(1)-C(7)                      | 1.506(2)   | C(1)-C(2)-C(3)          | 120.62(14) | F(1)-C(7)-C(1)          | 109.35(13) |
| F(2)-C(7)                      | 1.343(2)   | C(1)-C(2)-H(2)          | 119.7      | F(2)-C(7)-H(7)          | 107.5(12)  |
| C(2)-C(3)                      | 1.391(2)   | C(3)-C(2)-H(2)          | 119.7      | F(1)-C(7)-H(7)          | 101.0(13)  |
| C(2)-H(2)                      | 0.95       | C(4)-C(3)-C(2)          | 120.35(14) | C(1)-C(7)-H(7)          | 120.4(12)  |
| C(3)-C(4)                      | 1.378(2)   | C(4)-C(3)-H(3)          | 119.8      |                         |            |
| C(3)-H(3)                      | 0.95       | C(2)-C(3)-H(3)          | 119.8      |                         |            |
| C(4)-C(5)                      | 1.383(2)   | C(3)-C(4)-C(5)          | 120.07(14) |                         |            |
| C(4)-H(4)                      | 0.95       | C(3)-C(4)-H(4)          | 120        |                         |            |
| C(5)-C(6)                      | 1.377(2)   | C(5)-C(4)-H(4)          | 120        |                         |            |
| C(5)-H(5)                      | 0.95       | C(6)-C(5)-C(4)          | 119.15(14) |                         |            |
| C(7)-H(7)                      | 0.96(2)    | C(6)-C(5)-H(5)          | 120.4      |                         |            |

**Table S22.** Anisotropic displacement parameters ( $\text{\AA}^2 \times 10^3$ ) for *o*-nitro- $\alpha,\alpha$ -difluorotoluene (**1-CF<sub>2</sub>H**). The anisotropic displacement factor exponent takes the form:  $-2\pi^2[h^2a^*U^{11} + \dots + 2hk a^* b^* U^{12}]$ .

|      | $U^{11}$ | $U^{22}$ | $U^{33}$ | $U^{23}$ | $U^{13}$ | $U^{12}$ |
|------|----------|----------|----------|----------|----------|----------|
| F(1) | 25(1)    | 41(1)    | 29(1)    | -6(1)    | 5(1)     | -9(1)    |
| O(1) | 46(1)    | 23(1)    | 31(1)    | -2(1)    | 18(1)    | 9(1)     |
| N(1) | 28(1)    | 22(1)    | 25(1)    | 1(1)     | 9(1)     | 0(1)     |
| C(1) | 16(1)    | 25(1)    | 14(1)    | 1(1)     | 6(1)     | 0(1)     |
| F(2) | 20(1)    | 52(1)    | 51(1)    | -6(1)    | 15(1)    | 3(1)     |
| O(2) | 35(1)    | 26(1)    | 36(1)    | 5(1)     | 13(1)    | -8(1)    |
| C(2) | 22(1)    | 24(1)    | 16(1)    | 1(1)     | 8(1)     | 6(1)     |
| C(3) | 28(1)    | 18(1)    | 17(1)    | 1(1)     | 6(1)     | -1(1)    |
| C(4) | 20(1)    | 26(1)    | 18(1)    | 2(1)     | 6(1)     | -5(1)    |
| C(5) | 17(1)    | 25(1)    | 17(1)    | 3(1)     | 7(1)     | 2(1)     |
| C(6) | 21(1)    | 18(1)    | 15(1)    | 1(1)     | 7(1)     | 1(1)     |
| C(7) | 17(1)    | 36(1)    | 24(1)    | -1(1)    | 7(1)     | -2(1)    |

**Table S23.** Hydrogen coordinates ( $\times 10^4$ ) and isotropic displacement parameters ( $\text{\AA}^2 \times 10^3$ ) for *o*-nitro- $\alpha,\alpha$ -difluorotoluene (**1-CF<sub>2</sub>H**).

|      | x        | y        | z        | U(eq) |
|------|----------|----------|----------|-------|
| H(2) | 5494     | 8662     | 3380     | 25    |
| H(3) | 8220     | 9439     | 3672     | 26    |
| H(4) | 10687    | 8427     | 3863     | 26    |
| H(5) | 10445    | 6620     | 3767     | 24    |
| H(7) | 4460(30) | 6221(17) | 4160(30) | 31    |



### 6.2.2. *o*-Nitrophenol (1-OH)

*o*-Nitrophenol (1-OH) crystallized in the monoclinic space group  $P2_1/c$  with one molecule in the asymmetric unit. Packing of the unit cell of *o*-nitrophenol is similar to that of *o*-nitro- $\alpha,\alpha$ -difluorotoluene (1-CF<sub>2</sub>H); however, the distance between the two indicated aromatic rings is 3.329(15) Å, which is shorter than that of *o*-nitro- $\alpha,\alpha$ -difluorotoluene (1-CF<sub>2</sub>H). Coordinates for H1, the hydrogen atom of the hydroxyl group, were taken from the difference Fourier synthesis. H1 was subsequently refined freely to obtain good geometry parameters for the hydrogen bonding.

**Table S24.** Crystal data and structure refinement for *o*-nitrophenol (1-OH).

|                                 |                                               |
|---------------------------------|-----------------------------------------------|
| CCDC number                     | 1552716                                       |
| Empirical formula               | C <sub>6</sub> H <sub>5</sub> NO <sub>3</sub> |
| Formula weight                  | 139.11                                        |
| Temperature                     | 100(2) K                                      |
| Wavelength                      | 0.71073 Å                                     |
| Crystal system                  | Monoclinic                                    |
| Space group                     | $P2_1/c$                                      |
| Unit cell dimensions            |                                               |
| a = 6.3511(6) Å                 |                                               |
| b = 14.3305(14) Å               | $\beta = 103.348(2)^\circ$                    |
| c = 6.6757(6) Å                 |                                               |
| Volume                          | 591.17(10) Å <sup>3</sup>                     |
| Z                               | 4                                             |
| Density (calculated)            | 1.563 Mg/m <sup>3</sup>                       |
| Absorption coefficient          | 0.128 mm <sup>-1</sup>                        |
| F(000)                          | 288                                           |
| Crystal size                    | 0.170 x 0.160 x 0.120 mm <sup>3</sup>         |
| Theta range for data collection | 2.843 to 30.624°                              |
| Index ranges                    | -8<=h<=9, -20<=k<=20, -8<=l<=9                |
| Reflections collected           | 11483                                         |
| Independent reflections         | 1710 [R(int) = 0.0259]                        |
| Completeness to theta = 25.242° | 100.0 %                                       |
| Absorption correction           | Semi-empirical from equivalents               |
| Max. and min. transmission      | 0.7461 and 0.6901                             |
| Refinement method               | Full-matrix least-squares on $F^2$            |
| Data / restraints / parameters  | 1710 / 0 / 95                                 |
| Goodness-of-fit on $F^2$        | 1.078                                         |
| Final R indices [I>2sigma(I)]   | R1 = 0.0363, wR2 = 0.0981                     |
| R indices (all data)            | R1 = 0.0445, wR2 = 0.1045                     |
| Largest diff. peak and hole     | 0.368 and -0.268 e. Å <sup>-3</sup>           |

**Table S25.** Atomic coordinates ( $\times 10^4$ ) and equivalent isotropic displacement parameters ( $\text{\AA}^2 \times 10^3$ ) for *o*-nitrophenol (**1-OH**).  $U(\text{eq})$  is defined as one third of the trace of the orthogonalized  $U^{ij}$  tensor.

|      | x        | y       | z       | U(eq) |
|------|----------|---------|---------|-------|
| O(1) | 3855(1)  | 6748(1) | 5413(1) | 23(1) |
| N(1) | 8293(1)  | 6038(1) | 6695(1) | 18(1) |
| C(1) | 5588(2)  | 7318(1) | 5907(2) | 17(1) |
| O(2) | 6794(1)  | 5453(1) | 6269(1) | 24(1) |
| C(2) | 7751(2)  | 7021(1) | 6515(2) | 15(1) |
| O(3) | 10192(1) | 5808(1) | 7274(1) | 26(1) |
| C(3) | 9459(2)  | 7657(1) | 6992(2) | 17(1) |
| C(4) | 9033(2)  | 8604(1) | 6898(2) | 19(1) |
| C(5) | 6882(2)  | 8909(1) | 6316(2) | 20(1) |
| C(6) | 5192(2)  | 8281(1) | 5818(2) | 20(1) |

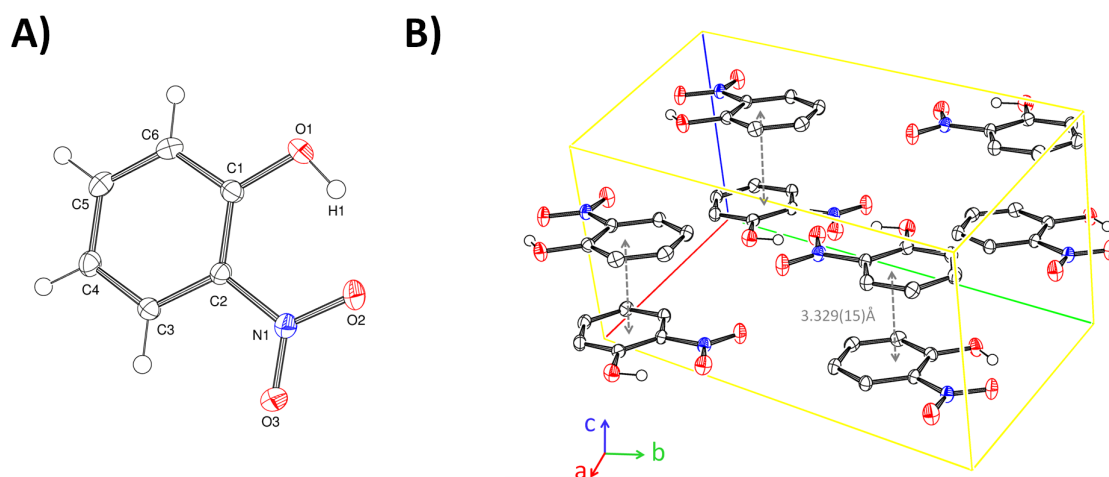

**Figure S45.** ORTEP representation of *o*-nitrophenol (**1-OH**, A). (B) shows the packing of the unit cell, hydrogen atoms, except H1, were deleted for clarity. The distance between the layers was determined to be 3.329(15) Å. Thermal ellipsoids are set at 50% probability.

**Table S26.** Bond distances [ $\text{\AA}$ ] and angles [ $^\circ$ ] for *o*-nitrophenol (**1-OH**).

| Bond distance ( $\text{\AA}$ ) |            | Bond angle ( $^\circ$ ) |           | Bond angle ( $^\circ$ ) |            |
|--------------------------------|------------|-------------------------|-----------|-------------------------|------------|
| O(1)-C(1)                      | 1.3486(12) | C(1)-O(1)-H(1)          | 104.4(13) | C(5)-C(4)-H(4)          | 120.4      |
| O(1)-H(1)                      | 0.91(2)    | O(3)-N(1)-O(2)          | 122.23(9) | C(6)-C(5)-C(4)          | 121.10(9)  |
| N(1)-O(3)                      | 1.2237(11) | O(3)-N(1)-C(2)          | 119.12(8) | C(6)-C(5)-H(5)          | 119.4      |
| N(1)-O(2)                      | 1.2513(11) | O(2)-N(1)-C(2)          | 118.65(8) | C(4)-C(5)-H(5)          | 119.4      |
| N(1)-C(2)                      | 1.4487(12) | O(1)-C(1)-C(6)          | 117.19(9) | C(5)-C(6)-C(1)          | 120.63(10) |
| C(1)-C(6)                      | 1.4011(14) | O(1)-C(1)-C(2)          | 125.15(9) | C(5)-C(6)-H(6)          | 119.7      |
| C(1)-C(2)                      | 1.4053(13) | C(6)-C(1)-C(2)          | 117.66(9) | C(1)-C(6)-H(6)          | 119.7      |
| C(2)-C(3)                      | 1.3960(13) | C(3)-C(2)-C(1)          | 121.64(9) |                         |            |
| C(3)-C(4)                      | 1.3812(14) | C(3)-C(2)-N(1)          | 117.30(9) |                         |            |
| C(3)-H(3)                      | 0.95       | C(1)-C(2)-N(1)          | 121.05(9) |                         |            |
| C(4)-C(5)                      | 1.4017(14) | C(4)-C(3)-C(2)          | 119.79(9) |                         |            |
| C(4)-H(4)                      | 0.95       | C(4)-C(3)-H(3)          | 120.1     |                         |            |
| C(5)-C(6)                      | 1.3815(15) | C(2)-C(3)-H(3)          | 120.1     |                         |            |
| C(5)-H(5)                      | 0.95       | C(3)-C(4)-C(5)          | 119.17(9) |                         |            |
| C(6)-H(6)                      | 0.95       | C(3)-C(4)-H(4)          | 120.4     |                         |            |

**Table S27.** Anisotropic displacement parameters ( $\text{\AA}^2 \times 10^3$ ) for *o*-nitrophenol (**1-OH**). The anisotropic displacement factor exponent takes the form:  $-2p^2[h^2 a^* U^{11} + \dots + 2 h k a^* b^* U^{12}]$ .

|      | $U^{11}$ | $U^{22}$ | $U^{33}$ | $U^{23}$ | $U^{13}$ | $U^{12}$ |
|------|----------|----------|----------|----------|----------|----------|
| O(1) | 14(1)    | 22(1)    | 29(1)    | 0(1)     | 1(1)     | -4(1)    |
| N(1) | 18(1)    | 14(1)    | 20(1)    | 0(1)     | 3(1)     | -1(1)    |
| C(1) | 15(1)    | 18(1)    | 16(1)    | 1(1)     | 3(1)     | -1(1)    |
| O(2) | 23(1)    | 16(1)    | 32(1)    | -1(1)    | 2(1)     | -6(1)    |
| C(2) | 16(1)    | 12(1)    | 16(1)    | 0(1)     | 2(1)     | 0(1)     |
| O(3) | 18(1)    | 17(1)    | 41(1)    | 3(1)     | 3(1)     | 3(1)     |
| C(3) | 15(1)    | 16(1)    | 19(1)    | -1(1)    | 2(1)     | 0(1)     |
| C(4) | 21(1)    | 14(1)    | 20(1)    | -1(1)    | 3(1)     | -2(1)    |
| C(5) | 25(1)    | 15(1)    | 19(1)    | 1(1)     | 4(1)     | 3(1)     |
| C(6) | 18(1)    | 19(1)    | 21(1)    | 2(1)     | 3(1)     | 5(1)     |

**Table S28.** Hydrogen coordinates ( $\times 10^4$ ) and isotropic displacement parameters ( $\text{\AA}^2 \times 10^3$ ) for *o*-nitrophenol (**1-OH**).

|      | x        | y        | z        | U(eq) |
|------|----------|----------|----------|-------|
| H(1) | 4430(30) | 6160(15) | 5560(30) | 55(5) |
| H(3) | 10909    | 7440     | 7381     | 20    |
| H(4) | 10184    | 9042     | 7223     | 23    |
| H(5) | 6580     | 9559     | 6264     | 24    |
| H(6) | 3747     | 8503     | 5411     | 24    |

### 6.2.3. *p*-Bromo- $\alpha,\alpha$ -difluorotoluene (2-CF<sub>2</sub>H)

2-CF<sub>2</sub>H crystallized as a non merohedral twin. Three components were identified with CELL\_NOW and refined using the hkl5 file. The batch scale factor (BASF) was refined and converged to a composition consisting of 59.1% of the first, 26.7% of the second, and 14.2% of the third twin domain.

The structure was solved in the monoclinic space group  $P2_1/c$  with half a molecule in the asymmetric unit. The bromo- and CF<sub>2</sub>H motifs were found to be disordered statistically across two positions, a result which is likely due to the similar space requirements of the CF<sub>2</sub>H and bromo motifs. Because half of the molecule is generated through crystallographic symmetry, the occupancies of the disordered motifs were set to 50% to generate the full disordered molecule.

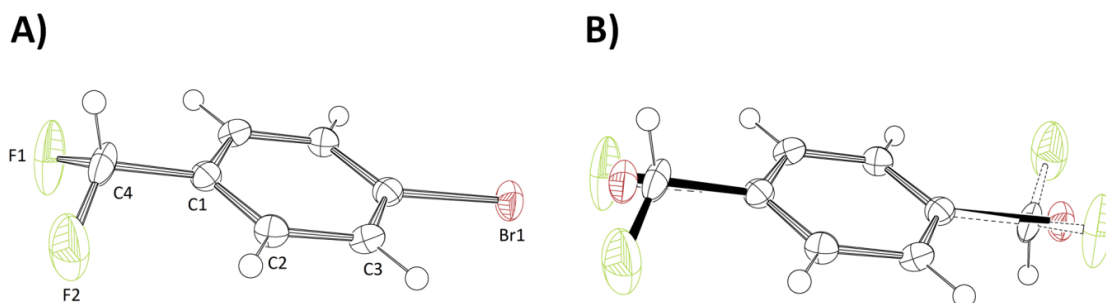

**Figure S46.** ORTEP representation of *p*-bromo- $\alpha,\alpha$ -difluorotoluene (2-CF<sub>2</sub>H) (A). Thermal ellipsoids are set at 50% probability. Disordered motifs are highlighted with bold/dashed bonds (B).

**Table S29.** Crystal data and structure refinement for *p*-bromo- $\alpha,\alpha$ -difluorotoluene (**2-CF<sub>2</sub>H**).

|                                                      |                                                    |
|------------------------------------------------------|----------------------------------------------------|
| CCDC number                                          | 1552717                                            |
| Empirical formula                                    | C <sub>7</sub> H <sub>5</sub> BrF <sub>2</sub>     |
| Formula weight                                       | 207.02                                             |
| Temperature                                          | 100(2) K                                           |
| Wavelength                                           | 0.71073 Å                                          |
| Crystal system                                       | Monoclinic                                         |
| Space group                                          | <i>P</i> 2 <sub>1</sub> / <i>c</i>                 |
| Unit cell dimensions                                 |                                                    |
| a = 7.962(2) Å                                       |                                                    |
| b = 7.097(2) Å                                       | $\beta = 92.557(4)^\circ$                          |
| c = 6.1966(18) Å                                     |                                                    |
| Volume                                               | 349.76(17) Å <sup>3</sup>                          |
| Z                                                    | 2                                                  |
| Density (calculated)                                 | 1.966 Mg/m <sup>3</sup>                            |
| Absorption coefficient                               | 5.825 mm <sup>-1</sup>                             |
| F(000)                                               | 200                                                |
| Crystal size                                         | 0.700 x 0.400 x 0.400 mm <sup>3</sup>              |
| Theta range for data collection                      | 2.561 to 29.477°.                                  |
| Index ranges                                         | -8<=h<=9, -20<=k<=20, -8<=l<=9                     |
| Reflections collected                                | 1066                                               |
| Independent reflections                              | 066 [R(int) = ?]                                   |
| Completeness to theta = 25.242°                      | 99.8 %                                             |
| Absorption correction                                | Semi-empirical from equivalents                    |
| Max. and min. transmission                           | 0.745882 and 0.257008                              |
| Refinement method                                    | Full-matrix least-squares on <i>F</i> <sup>2</sup> |
| Data / restraints / parameters                       | 1066 / 96 / 69                                     |
| Goodness-of-fit on <i>F</i> <sup>2</sup>             | 1.125                                              |
| Final R indices [ <i>I</i> >2 $\sigma$ ( <i>I</i> )] | R1 = 0.0578, wR2 = 0.1367                          |
| R indices (all data)                                 | R1 = 0.0824, wR2 = 0.1549                          |
| Largest diff. peak and hole                          | 0.888 and -0.669 e. Å <sup>-3</sup>                |

**Table S30.** Atomic coordinates ( $\times 10^4$ ) and equivalent isotropic displacement parameters ( $\text{Å}^2 \times 10^3$ ) for *p*-bromo- $\alpha,\alpha$ -difluorotoluene (**2-CF<sub>2</sub>H**). *U*(eq) is defined as one third of the trace of the orthogonalized *U*<sup>ij</sup> tensor.

|       | x        | y        | z        | U(eq) |
|-------|----------|----------|----------|-------|
| Br(1) | 8496(2)  | 5518(2)  | 7992(2)  | 28(1) |
| C(1)  | 6489(5)  | 5240(5)  | 6196(7)  | 20(1) |
| C(3)  | 5027(5)  | 4220(6)  | 2928(7)  | 22(1) |
| C(2)  | 6522(5)  | 4473(6)  | 4145(7)  | 20(1) |
| C(4)  | 8126(15) | 5570(20) | 7395(18) | 28(3) |
| F(2)  | 9251(8)  | 4251(12) | 6904(12) | 58(2) |
| F(1)  | 7914(8)  | 5388(13) | 9508(10) | 59(2) |

**Table S31.** Bond distances [ $\text{\AA}$ ] and angles [ $^\circ$ ] for *p*-bromo- $\alpha,\alpha$ -difluorotoluene (**2-CF<sub>2</sub>H**).

| Bond distance ( $\text{\AA}$ ) |           | Bond angle ( $^\circ$ ) |          | Bond angle ( $^\circ$ ) |           |
|--------------------------------|-----------|-------------------------|----------|-------------------------|-----------|
| Br(1)-C(1)                     | 1.916(4)  | C(2)-C(1)-C(3)#1        | 121.1(4) | C(3)-C(2)-H(2)          | 120.1     |
| C(1)-C(2)                      | 1.384(6)  | C(2)-C(1)-C(4)          | 117.9(5) | F(1)-C(4)-F(2)          | 105.7(11) |
| C(1)-C(3)#1                    | 1.398(5)  | C(3)#1-C(1)-C(4)        | 120.9(6) | F(1)-C(4)-C(1)          | 109.2(9)  |
| C(1)-C(4)                      | 1.490(11) | C(2)-C(1)-Br(1)         | 121.6(3) | F(2)-C(4)-C(1)          | 110.9(9)  |
| C(3)-C(2)                      | 1.392(6)  | C(3)#1-C(1)-Br(1)       | 117.3(3) | F(1)-C(4)-H(4)          | 110.3     |
| C(3)-H(3)                      | 0.9500    | C(2)-C(3)-C(1)#1        | 119.1(4) | F(2)-C(4)-H(4)          | 110.3     |
| C(2)-H(2)                      | 0.9500    | C(2)-C(3)-H(3)          | 120.5    | C(1)-C(4)-H(4)          | 110.3     |
| C(4)-F(1)                      | 1.333(12) | C(1)#1-C(3)-H(3)        | 120.5    |                         |           |
| C(4)-F(2)                      | 1.340(13) | C(1)-C(2)-C(3)          | 119.8(3) |                         |           |
| C(4)-H(4)                      | 1.0000    | C(1)-C(2)-H(2)          | 120.1    |                         |           |

Symmetry transformations used to generate equivalent atoms:

#1 -x+1,-y+1,-z+1

**Table S32.** Anisotropic displacement parameters ( $\text{\AA}^2 \times 10^3$ ) for *p*-bromo- $\alpha,\alpha$ -difluorotoluene (**2-CF<sub>2</sub>H**). The anisotropic displacement factor exponent takes the form:  $-2p^2[h^2a^*U^{11} + \dots + 2hka^*b^*U^{12}]$ .

|       | $U^{11}$ | $U^{22}$ | $U^{33}$ | $U^{23}$ | $U^{13}$ | $U^{12}$ |
|-------|----------|----------|----------|----------|----------|----------|
| Br(1) | 23(1)    | 35(1)    | 26(1)    | 2(1)     | -8(1)    | -4(1)    |
| C(1)  | 18(2)    | 17(2)    | 24(2)    | 1(2)     | 0(1)     | -2(1)    |
| C(3)  | 23(2)    | 18(2)    | 24(2)    | -4(2)    | 2(2)     | -1(1)    |
| C(2)  | 18(2)    | 21(2)    | 22(2)    | 0(2)     | 4(1)     | 1(1)     |
| C(4)  | 31(6)    | 35(5)    | 17(5)    | -2(5)    | -8(4)    | -9(4)    |
| F(2)  | 32(3)    | 96(6)    | 45(4)    | -17(4)   | -8(3)    | 20(3)    |
| F(1)  | 33(3)    | 123(7)   | 22(3)    | -7(4)    | -8(2)    | -4(4)    |

**Table S33.** Hydrogen coordinates ( $\times 10^4$ ) and isotropic displacement parameters ( $\text{\AA}^2 \times 10^3$ ) for *p*-bromo- $\alpha,\alpha$ -difluorotoluene (**2-CF<sub>2</sub>H**).

|      | x    | y    | z    | U(eq) |
|------|------|------|------|-------|
| H(3) | 5036 | 3689 | 1522 | 26    |
| H(2) | 7562 | 4120 | 3570 | 24    |
| H(4) | 8565 | 6854 | 7069 | 34    |

#### 6.2.4. 1-Benzyloxy-4-(difluoromethyl)benzene (**5-CF<sub>2</sub>H**)

**5-CF<sub>2</sub>H** crystallized in the monoclinic space group  $P2_1/c$  with one molecule in the asymmetric unit. The coordinates of the CF<sub>2</sub>H hydrogen were taken from the Fourier synthesis and refined freely. All other hydrogen atoms were attached to idealized positions and their isotropic displacement parameters were fixed to 1.2 times the  $U_{eq}$  value of the atoms to which they are attached.

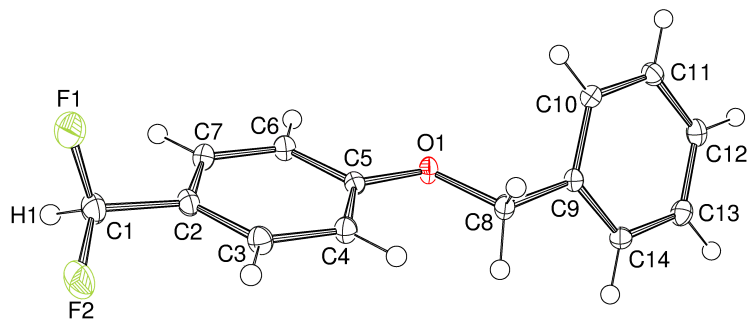

Figure S47. ORTEP representation of 1-benzyloxy-4-(difluoromethyl)benzene (5-CF<sub>2</sub>H). Thermal ellipsoids are set at 50% probability.

**Table S34.** Crystal data and structure refinement for 1-benzyloxy-4-(difluoromethyl)benzene (5-CF<sub>2</sub>H).

|                                          |                                                    |
|------------------------------------------|----------------------------------------------------|
| CCDC number                              | 1552718                                            |
| Empirical formula                        | C <sub>14</sub> H <sub>12</sub> F <sub>2</sub> O   |
| Formula weight                           | 234.24                                             |
| Temperature                              | 100(2) K                                           |
| Wavelength                               | 0.71073 Å                                          |
| Crystal system                           | Monoclinic                                         |
| Space group                              | <i>P</i> 2 <sub>1</sub> / <i>c</i>                 |
| Unit cell dimensions                     |                                                    |
| a = 14.4147(11) Å                        |                                                    |
| b = 10.6790(8) Å                         | β = 103.7140(10)                                   |
| c = 7.5441(6) Å                          |                                                    |
| Volume                                   | 1128.19(15) Å <sup>3</sup>                         |
| Z                                        | 4                                                  |
| Density (calculated)                     | 1.379 Mg/m <sup>3</sup>                            |
| Absorption coefficient                   | 0.108 mm <sup>-1</sup>                             |
| F(000)                                   | 488                                                |
| Crystal size                             | 0.400 x 0.300 x 0.300 mm <sup>3</sup>              |
| Theta range for data collection          | 1.454 to 30.905°                                   |
| Index ranges                             | -20 ≤ h ≤ 20, -15 ≤ k ≤ 14, -10 ≤ l ≤ 10           |
| Reflections collected                    | 24098                                              |
| Independent reflections                  | 3407 [R(int) = 0.0264]                             |
| Completeness to theta = 25.242°          | 100.0 %                                            |
| Absorption correction                    | Semi-empirical from equivalents                    |
| Max. and min. transmission               | 0.7461 and 0.7038                                  |
| Refinement method                        | Full-matrix least-squares on <i>F</i> <sup>2</sup> |
| Data / restraints / parameters           | 3407 / 0 / 158                                     |
| Goodness-of-fit on <i>F</i> <sup>2</sup> | 1.037                                              |
| Final R indices [I > 2σ(I)]              | R1 = 0.0385, wR2 = 0.1015                          |
| R indices (all data)                     | R1 = 0.0433, wR2 = 0.1064                          |
| Largest diff. peak and hole              | 0.451 and -0.292 e. Å <sup>-3</sup>                |

**Table S35.** Atomic coordinates ( $\times 10^4$ ) and equivalent isotropic displacement parameters ( $\text{\AA}^2 \times 10^3$ ) for 1-benzyl-oxy-4-(difluoromethyl)benzene (**5-CF<sub>2</sub>H**).  $U(\text{eq})$  is defined as one third of the trace of the orthogonalized  $U^{ij}$  tensor.

|       | x       | y       | z       | U(eq) |
|-------|---------|---------|---------|-------|
| F(1)  | -562(1) | 3116(1) | 6562(1) | 34(1) |
| O(1)  | 3832(1) | 3617(1) | 7816(1) | 14(1) |
| C(1)  | -47(1)  | 3790(1) | 8039(1) | 20(1) |
| F(2)  | -446(1) | 4954(1) | 7850(1) | 30(1) |
| C(2)  | 984(1)  | 3819(1) | 7992(1) | 15(1) |
| C(3)  | 1372(1) | 4806(1) | 7208(1) | 16(1) |
| C(4)  | 2328(1) | 4782(1) | 7118(1) | 15(1) |
| C(5)  | 2890(1) | 3752(1) | 7819(1) | 12(1) |
| C(6)  | 2501(1) | 2758(1) | 8613(1) | 14(1) |
| C(7)  | 1554(1) | 2796(1) | 8703(1) | 16(1) |
| C(8)  | 4275(1) | 4628(1) | 7054(1) | 14(1) |
| C(9)  | 5279(1) | 4245(1) | 7081(1) | 12(1) |
| C(10) | 5449(1) | 3176(1) | 6136(1) | 14(1) |
| C(11) | 6376(1) | 2831(1) | 6117(1) | 16(1) |
| C(12) | 7147(1) | 3555(1) | 7043(1) | 17(1) |
| C(13) | 6984(1) | 4628(1) | 7965(1) | 17(1) |
| C(14) | 6051(1) | 4972(1) | 7987(1) | 14(1) |



**Table S36.** Bond distances [ $\text{\AA}$ ] and angles [ $^\circ$ ] for 1-benzyloxy-4-(difluoromethyl)benzene (**5-CF<sub>2</sub>H**).

|             | Bond distance ( $\text{\AA}$ ) |                 | Bond angle ( $^\circ$ ) |                   |           |
|-------------|--------------------------------|-----------------|-------------------------|-------------------|-----------|
| F(1)-C(1)   | 1.3845(12)                     | C(5)-O(1)-C(8)  | 117.12(7)               | H(8A)-C(8)-H(8B)  | 108.4     |
| O(1)-C(5)   | 1.3667(10)                     | F(2)-C(1)-F(1)  | 104.92(8)               | C(14)-C(9)-C(10)  | 119.29(8) |
| O(1)-C(8)   | 1.4408(10)                     | F(2)-C(1)-C(2)  | 112.07(8)               | C(14)-C(9)-C(8)   | 120.65(8) |
| C(1)-F(2)   | 1.3632(12)                     | F(1)-C(1)-C(2)  | 109.77(8)               | C(10)-C(9)-C(8)   | 120.02(8) |
| C(1)-C(2)   | 1.4944(12)                     | F(2)-C(1)-H(1)  | 106.9(8)                | C(11)-C(10)-C(9)  | 120.40(8) |
| C(1)-H(1)   | 0.962(13)                      | F(1)-C(1)-H(1)  | 106.9(8)                | C(11)-C(10)-H(10) | 119.8     |
| C(2)-C(3)   | 1.3906(13)                     | C(2)-C(1)-H(1)  | 115.6(8)                | C(9)-C(10)-H(10)  | 119.8     |
| C(2)-C(7)   | 1.3955(12)                     | C(3)-C(2)-C(7)  | 119.80(8)               | C(10)-C(11)-C(12) | 120.09(8) |
| C(3)-C(4)   | 1.3965(12)                     | C(3)-C(2)-C(1)  | 121.90(8)               | C(10)-C(11)-H(11) | 120.0     |
| C(3)-H(3)   | 0.9500                         | C(7)-C(2)-C(1)  | 118.26(8)               | C(12)-C(11)-H(11) | 120.0     |
| C(4)-C(5)   | 1.3937(12)                     | C(2)-C(3)-C(4)  | 120.53(8)               | C(13)-C(12)-C(11) | 119.82(8) |
| C(4)-H(4)   | 0.9500                         | C(2)-C(3)-H(3)  | 119.7                   | C(13)-C(12)-H(12) | 120.1     |
| C(5)-C(6)   | 1.3993(12)                     | C(4)-C(3)-H(3)  | 119.7                   | C(11)-C(12)-H(12) | 120.1     |
| C(6)-C(7)   | 1.3836(12)                     | C(5)-C(4)-C(3)  | 119.20(8)               | C(12)-C(13)-C(14) | 120.01(8) |
| C(6)-H(6)   | 0.9500                         | C(5)-C(4)-H(4)  | 120.4                   | C(12)-C(13)-H(13) | 120.0     |
| C(7)-H(7)   | 0.9500                         | C(3)-C(4)-H(4)  | 120.4                   | C(14)-C(13)-H(13) | 120.0     |
| C(8)-C(9)   | 1.5005(12)                     | O(1)-C(5)-C(4)  | 124.79(8)               | C(9)-C(14)-C(13)  | 120.39(8) |
| C(8)-H(8A)  | 0.9900                         | O(1)-C(5)-C(6)  | 114.84(7)               | C(9)-C(14)-H(14)  | 119.8     |
| C(8)-H(8B)  | 0.9900                         | C(4)-C(5)-C(6)  | 120.36(8)               | C(13)-C(14)-H(14) | 119.8     |
| C(9)-C(14)  | 1.3947(12)                     | C(7)-C(6)-C(5)  | 119.91(8)               |                   |           |
| C(9)-C(10)  | 1.3978(12)                     | C(7)-C(6)-H(6)  | 120.0                   |                   |           |
| C(10)-C(11) | 1.3895(12)                     | C(5)-C(6)-H(6)  | 120.0                   |                   |           |
| C(10)-H(10) | 0.9500                         | C(6)-C(7)-C(2)  | 120.19(8)               |                   |           |
| C(11)-C(12) | 1.3976(13)                     | C(6)-C(7)-H(7)  | 119.9                   |                   |           |
| C(11)-H(11) | 0.9500                         | C(2)-C(7)-H(7)  | 119.9                   |                   |           |
| C(12)-C(13) | 1.3897(13)                     | O(1)-C(8)-C(9)  | 107.90(7)               |                   |           |
| C(12)-H(12) | 0.9500                         | O(1)-C(8)-H(8A) | 110.1                   |                   |           |
| C(13)-C(14) | 1.3971(12)                     | C(9)-C(8)-H(8A) | 110.1                   |                   |           |
| C(13)-H(13) | 0.9500                         | O(1)-C(8)-H(8B) | 110.1                   |                   |           |
| C(14)-H(14) | 0.9500                         | C(9)-C(8)-H(8B) | 110.1                   |                   |           |

**Table S37.** Anisotropic displacement parameters ( $\text{\AA}^2 \times 10^3$ ) for 1-benzyloxy-4-(difluoromethyl)benzene (**5-CF<sub>2</sub>H**). The anisotropic displacement factor exponent takes the form:  $-2p^2[h^2a^*2U^{11} + \dots + 2hk a^* b^* U^{12}]$ .

|       | $U^{11}$ | $U^{22}$ | $U^{33}$ | $U^{23}$ | $U^{13}$ | $U^{12}$ |
|-------|----------|----------|----------|----------|----------|----------|
| F(1)  | 14(1)    | 45(1)    | 41(1)    | -16(1)   | 5(1)     | -5(1)    |
| O(1)  | 11(1)    | 15(1)    | 18(1)    | 4(1)     | 6(1)     | 1(1)     |
| C(1)  | 14(1)    | 24(1)    | 23(1)    | 0(1)     | 6(1)     | 1(1)     |
| F(2)  | 18(1)    | 29(1)    | 43(1)    | 1(1)     | 12(1)    | 8(1)     |
| C(2)  | 12(1)    | 19(1)    | 15(1)    | -1(1)    | 4(1)     | 0(1)     |
| C(3)  | 14(1)    | 17(1)    | 18(1)    | 2(1)     | 4(1)     | 3(1)     |
| C(4)  | 14(1)    | 15(1)    | 16(1)    | 2(1)     | 5(1)     | 1(1)     |
| C(5)  | 11(1)    | 15(1)    | 11(1)    | 0(1)     | 3(1)     | 0(1)     |
| C(6)  | 14(1)    | 15(1)    | 15(1)    | 2(1)     | 4(1)     | 1(1)     |
| C(7)  | 14(1)    | 17(1)    | 16(1)    | 2(1)     | 5(1)     | -2(1)    |
| C(8)  | 12(1)    | 14(1)    | 17(1)    | 2(1)     | 6(1)     | 0(1)     |
| C(9)  | 12(1)    | 13(1)    | 12(1)    | 2(1)     | 4(1)     | 0(1)     |
| C(10) | 14(1)    | 14(1)    | 15(1)    | 0(1)     | 4(1)     | -2(1)    |
| C(11) | 17(1)    | 15(1)    | 17(1)    | 0(1)     | 7(1)     | 2(1)     |
| C(12) | 13(1)    | 20(1)    | 18(1)    | 4(1)     | 6(1)     | 2(1)     |
| C(13) | 13(1)    | 20(1)    | 16(1)    | 1(1)     | 2(1)     | -3(1)    |
| C(14) | 15(1)    | 15(1)    | 14(1)    | -1(1)    | 3(1)     | -1(1)    |

**Table S38.** Hydrogen coordinates ( $\times 10^4$ ) and isotropic displacement parameters ( $\text{\AA}^2 \times 10^3$ ) for 1-benzyloxy-4-(difluoromethyl)benzene (**5-CF<sub>2</sub>H**).

|       | x       | y        | z        | U(eq) |
|-------|---------|----------|----------|-------|
| H(1)  | -184(9) | 3425(12) | 9114(17) | 17(3) |
| H(3)  | 984     | 5504     | 6729     | 20    |
| H(4)  | 2593    | 5459     | 6586     | 18    |
| H(6)  | 2887    | 2058     | 9089     | 17    |
| H(7)  | 1292    | 2124     | 9250     | 19    |
| H(8A) | 4277    | 5399     | 7785     | 17    |
| H(8B) | 3916    | 4799     | 5787     | 17    |
| H(10) | 4926    | 2682     | 5503     | 17    |
| H(11) | 6485    | 2102     | 5474     | 19    |
| H(12) | 7781    | 3314     | 7042     | 20    |
| H(13) | 7506    | 5129     | 8581     | 20    |
| H(14) | 5942    | 5704     | 8622     | 17    |

### 6.2.5. Experimental details of the crystal structure re-refinement of published structures

Two structures were re-refined and a more detailed disorder model was applied to obtain hydrogen bonding parameters with a higher accuracy. All structures were re-refined by full-matrix least-squares based on  $F^2$  using SHELXL (Re. 789).<sup>25</sup> Each structure was checked for higher symmetry using PLATON.<sup>26</sup> All non-hydrogen atoms were located and refined anisotropically. If not otherwise noted, the isotropic displacement parameters of the hydrogen atoms were fixed to 1.2 times the  $U_{eq}$  value of the atoms to which they are attached. Figures were

generated using the program ORTEP. See Figures S51-S52 and Tables S39-S48 below for crystallographic data and refinement details.

### 6.2.5.1. CCDC Entry SUQQEC

SUQQEC crystallized in the orthorhombic space group *Pbcn* with one molecule in the asymmetric unit. Coordinates for H2n, the hydrogen atom of the amino group, were taken from the difference Fourier synthesis. H2n was subsequently refined freely. All other hydrogen atoms including H15, the hydrogen atom of the CF<sub>2</sub>H group, were attached to idealized positions. Their isotropic displacement parameters were fixed to 1.2 times the  $U_{eq}$  value of the atoms to which they are attached. The CF<sub>2</sub>H group was modeled across two positions. The major component of the disorder refined to an occupancy of 63.3%. The CFCIH group was also found to be disordered and was subsequently modeled across two positions. The major part refined to an occupancy of 75.7%. Distance and anisotropic displacement parameter restraints were applied to all disordered atoms.

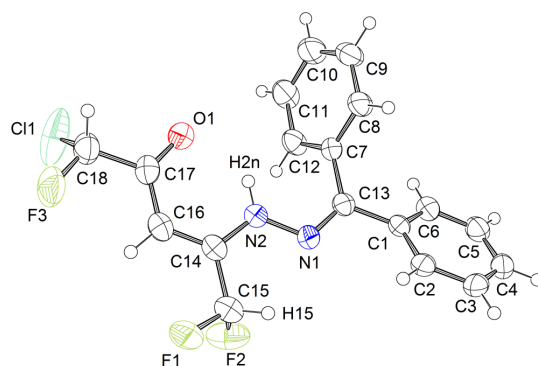

**Figure S48.** ORTEP representation of SUQQEC. Thermal ellipsoids are set at 50% probability.

### res-file for the re-refinement of SUQQEC:

```
TITL import in P c n b transformed to space group : Pbcn
CELL 0.71073 10.0193 20.3405 16.9296 90.000 90.000 90.000
ZERR 8.00 0.0003 0.0006 0.0004 0.000 0.000 0.000
LATT 1
SYMM 1/2 - X, 1/2 - Y, 1/2 + Z
SYMM 1/2 + X, 1/2 - Y, - Z
SYMM - X, Y, 1/2 - Z
SFAC C H N O F CL
UNIT 144 112 16 8 24 8
LIST 4
FMAP 2
PLAN 5
ACTA
BOND $H
OMIT 0 2 0 ! beamstop
OMIT 1 1 0 ! beamstop
```

```

OMIT 0 2 1 ! beamstop
OMIT 1 1 1 ! Outlier
HTAB
HTAB N2 O1
RIGU
SADI C15 F1 C15 F2 C15 F1B C15 F2B C18 F3 C18 F3B
SADI C18 C11 C18 C11B
DFIX 0.88 N2 H2N
SIZE 0.40x0.35x0.30
L.S. 10
TEMP -100.00
WGHT 0.067400 2.395100
FVAR 0.36612 0.63255 0.75704
O1 4 0.392743 0.927444 0.179835 11.00000 0.04609 0.04195 =
0.04347 -0.00327 0.00124 -0.00103
N1 3 0.417444 0.741529 0.118093 11.00000 0.03165 0.03448 =
0.04076 -0.00184 0.00348 0.00126
N2 3 0.385233 0.799168 0.157013 11.00000 0.03527 0.03502 =
0.03889 0.00023 0.00526 -0.00102
H2N 2 0.412795 0.837476 0.140864 11.00000 -1.20000
C1 1 0.522101 0.686363 0.012694 11.00000 0.02326 0.03433 =
0.04221 -0.00056 0.00232 -0.00101
C2 1 0.551190 0.629850 0.056176 11.00000 0.03004 0.03666 =
0.04497 -0.00006 0.00098 -0.00356
AFIX 43
H2 2 0.545867 0.630843 0.112190 11.00000 -1.20000
AFIX 0
C3 1 0.587701 0.572448 0.018192 11.00000 0.03364 0.03324 =
0.06257 0.00017 0.00240 -0.00327
AFIX 43
H3 2 0.608378 0.534342 0.048242 11.00000 -1.20000
AFIX 0
C4 1 0.594268 0.570239 -0.063431 11.00000 0.03868 0.03983 =
0.06262 -0.01230 0.01085 -0.00336
AFIX 43
H4 2 0.619021 0.530686 -0.089429 11.00000 -1.20000
AFIX 0
C5 1 0.564763 0.625625 -0.106741 11.00000 0.04546 0.05010 =
0.04536 -0.00765 0.01109 -0.00516
AFIX 43
H5 2 0.567951 0.623922 -0.162787 11.00000 -1.20000
AFIX 0
C6 1 0.530468 0.683820 -0.069428 11.00000 0.03654 0.04235 =
0.04324 0.00032 0.00393 0.00088
AFIX 43
H6 2 0.512619 0.722064 -0.099858 11.00000 -1.20000
AFIX 0
C7 1 0.515436 0.811779 0.014050 11.00000 0.03144 0.03328 =
0.03635 -0.00061 0.00301 0.00247
C8 1 0.647574 0.827627 -0.001337 11.00000 0.03070 0.04136 =
0.06399 0.00754 0.00623 0.00487

```

|      |    |          |          |           |           |          |           |  |
|------|----|----------|----------|-----------|-----------|----------|-----------|--|
| AFIX | 43 |          |          |           |           |          |           |  |
| H8   | 2  | 0.716538 | 0.798068 | 0.013557  | 11.00000  | -1.20000 |           |  |
| AFIX | 0  |          |          |           |           |          |           |  |
| C9   | 1  | 0.679333 | 0.885977 | -0.038086 | 11.00000  | 0.03988  | 0.04763 = |  |
|      |    | 0.08723  | 0.01454  | 0.01903   | -0.00025  |          |           |  |
| AFIX | 43 |          |          |           |           |          |           |  |
| H9   | 2  | 0.770119 | 0.896522 | -0.048160 | 11.00000  | -1.20000 |           |  |
| AFIX | 0  |          |          |           |           |          |           |  |
| C10  | 1  | 0.580242 | 0.929158 | -0.060335 | 11.00000  | 0.06296  | 0.04615 = |  |
|      |    | 0.07664  | 0.02268  | 0.02039   | 0.00632   |          |           |  |
| AFIX | 43 |          |          |           |           |          |           |  |
| H10  | 2  | 0.602237 | 0.969328 | -0.085832 | 11.00000  | -1.20000 |           |  |
| AFIX | 0  |          |          |           |           |          |           |  |
| C11  | 1  | 0.449233 | 0.913496 | -0.045246 | 11.00000  | 0.05231  | 0.05435 = |  |
|      |    | 0.06156  | 0.02273  | 0.00985   | 0.01725   |          |           |  |
| AFIX | 43 |          |          |           |           |          |           |  |
| H11  | 2  | 0.380711 | 0.943253 | -0.060283 | 11.00000  | -1.20000 |           |  |
| AFIX | 0  |          |          |           |           |          |           |  |
| C12  | 1  | 0.415930 | 0.855444 | -0.008739 | 11.00000  | 0.03328  | 0.05013 = |  |
|      |    | 0.04664  | 0.01081  | 0.00251   | 0.00776   |          |           |  |
| AFIX | 43 |          |          |           |           |          |           |  |
| H12  | 2  | 0.324898 | 0.845151 | 0.000925  | 11.00000  | -1.20000 |           |  |
| AFIX | 0  |          |          |           |           |          |           |  |
| C13  | 1  | 0.481109 | 0.747953 | 0.052265  | 11.00000  | 0.02387  | 0.03555 = |  |
|      |    | 0.03920  | 0.00132  | -0.00229  | 0.00156   |          |           |  |
| C14  | 1  | 0.318747 | 0.797388 | 0.225492  | 11.00000  | 0.03287  | 0.04606 = |  |
|      |    | 0.03829  | 0.00107  | 0.00349   | 0.00032   |          |           |  |
| C15  | 1  | 0.273138 | 0.730169 | 0.252770  | 11.00000  | 0.05751  | 0.05183 = |  |
|      |    | 0.05199  | 0.00372  | 0.01714   | -0.00541  |          |           |  |
| PART | 1  |          |          |           |           |          |           |  |
| AFIX | 13 |          |          |           |           |          |           |  |
| H15A | 2  | 0.344996 | 0.697061 | 0.242858  | 21.00000  | -1.20000 |           |  |
| AFIX | 13 |          |          |           |           |          |           |  |
| PART | 2  |          |          |           |           |          |           |  |
| H15B | 2  | 0.233865 | 0.710010 | 0.204167  | -21.00000 | -1.20000 |           |  |
| AFIX | 0  |          |          |           |           |          |           |  |
| PART | 0  |          |          |           |           |          |           |  |
| C16  | 1  | 0.292075 | 0.852941 | 0.268470  | 11.00000  | 0.04151  | 0.05176 = |  |
|      |    | 0.03489  | -0.00210 | 0.00466   | 0.00191   |          |           |  |
| AFIX | 43 |          |          |           |           |          |           |  |
| H16  | 2  | 0.244245 | 0.849107 | 0.316703  | 11.00000  | -1.20000 |           |  |
| AFIX | 0  |          |          |           |           |          |           |  |
| C17  | 1  | 0.333873 | 0.915775 | 0.242904  | 11.00000  | 0.03665  | 0.04717 = |  |
|      |    | 0.03843  | -0.00731 | -0.00388  | 0.00430   |          |           |  |
| C18  | 1  | 0.307243 | 0.974407 | 0.296609  | 11.00000  | 0.05296  | 0.05527 = |  |
|      |    | 0.04803  | -0.01295 | 0.00401   | 0.00099   |          |           |  |
| PART | 1  |          |          |           |           |          |           |  |
| AFIX | 13 |          |          |           |           |          |           |  |
| H18A | 2  | 0.392520 | 0.999315 | 0.303420  | 31.00000  | -1.20000 |           |  |
| AFIX | 13 |          |          |           |           |          |           |  |
| PART | 2  |          |          |           |           |          |           |  |

H18B 2 0.326885 0.965388 0.353499 -31.00000 -1.20000  
 AFIX 0  
 PART 0  
 PART 1  
 F1 5 0.245446 0.733560 0.333930 21.00000 0.07718 0.06202 =  
 0.04620 0.01243 0.01660 -0.00762  
 F2 5 0.167445 0.712928 0.218181 21.00000 0.08169 0.07993 =  
 0.06589 0.01567 -0.01633 -0.03636  
 CL1 6 0.189103 1.026991 0.255561 31.00000 0.15047 0.09510 =  
 0.08628 -0.03659 -0.03275 0.07557  
 F3 5 0.261369 0.956359 0.370184 31.00000 0.13288 0.06698 =  
 0.05277 -0.01743 0.02881 0.00398  
 PART 2  
 F1B 5 0.370555 0.692195 0.269774 -21.00000 0.08697 0.05532 =  
 0.05771 0.01785 -0.01721 -0.00251  
 F2B 5 0.172034 0.734342 0.301212 -21.00000 0.11218 0.07520 =  
 0.11504 -0.02063 0.08113 -0.02979  
 CL1B 6 0.143821 0.995781 0.279435 -31.00000 0.06371 0.07015 =  
 0.10772 -0.03841 0.01701 0.00413  
 F3B 5 0.377611 1.029539 0.266122 -31.00000 0.12636 0.05415 =  
 0.07787 -0.02142 0.02179 -0.03254  
 PART 0  
 HKLF 4

REM import in P c n b transformed to space group : Pbcn  
 REM R1 = 0.0626 for 2706 Fo > 4sig(Fo) and 0.0975 for all 3959 data  
 REM 267 parameters refined using 227 restraints

END

WGHT 0.0674 2.3951

REM Instructions for potential hydrogen bonds

HTAB N2 O1

EQIV \$1 -x+1, y, -z+1/2

HTAB C18 O1\_\$1

REM Highest difference peak 0.496, deepest hole -0.473, 1-sigma level 0.050

Q1 1 0.1711 0.9598 0.3341 11.00000 0.05 0.50  
 Q2 1 0.2854 1.0417 0.2625 11.00000 0.05 0.33  
 Q3 1 0.1015 0.7473 0.2499 11.00000 0.05 0.30  
 Q4 1 0.3076 0.7050 0.3071 11.00000 0.05 0.21  
 Q5 1 0.4968 0.7845 0.0343 11.00000 0.05 0.20

**Table S39.** Crystal data and structure refinement for SUQQEC.

|                                   |                                                                   |
|-----------------------------------|-------------------------------------------------------------------|
| Empirical formula                 | C <sub>18</sub> H <sub>14</sub> ClF <sub>3</sub> N <sub>2</sub> O |
| Formula weight                    | 366.76                                                            |
| Temperature                       | 173(2) K                                                          |
| Wavelength                        | 0.71073 Å                                                         |
| Crystal system                    | Orthorhombic                                                      |
| Space group                       | <i>Pbcn</i>                                                       |
| Unit cell dimensions              |                                                                   |
| a = 10.0193(3) Å                  |                                                                   |
| b = 20.3405(6) Å                  |                                                                   |
| c = 16.9296(4) Å                  |                                                                   |
| Volume                            | 3450.21(17) Å <sup>3</sup>                                        |
| Z                                 | 8                                                                 |
| Density (calculated)              | 1.412 Mg/m <sup>3</sup>                                           |
| Absorption coefficient            | 0.260 mm <sup>-1</sup>                                            |
| F(000)                            | 1504                                                              |
| Crystal size                      | 0.400 x 0.350 x 0.300 mm <sup>3</sup>                             |
| Theta range for data collection   | 2.406 to 27.509°                                                  |
| Index ranges                      | -10<=h<=13, -19<=k<=26, -21<=l<=21                                |
| Reflections collected             | 23579                                                             |
| Independent reflections           | 3959 [R(int) = 0.0629]                                            |
| Completeness to theta = 25.242°   | 99.80%                                                            |
| Refinement method                 | Full-matrix least-squares on F <sup>2</sup>                       |
| Data / restraints / parameters    | 3959 / 227 / 267                                                  |
| Goodness-of-fit on F <sup>2</sup> | 1.038                                                             |
| Final R indices [I>2sigma(I)]     | R1 = 0.0626, wR2 = 0.1475                                         |
| R indices (all data)              | R1 = 0.0975, wR2 = 0.1656                                         |
| Largest diff. peak and hole       | 0.496 and -0.473 e.Å <sup>-3</sup>                                |

**Table S40.** Atomic coordinates ( $\times 10^4$ ) and equivalent isotropic displacement parameters ( $\text{\AA}^2 \times 10^3$ ) for SUQQEC. U(eq) is defined as one third of the trace of the orthogonalized  $U^{ij}$  tensor.

|        | X       | Y        | Z        | U(eq)  |
|--------|---------|----------|----------|--------|
| O(1)   | 3927(2) | 9274(1)  | 1798(1)  | 44(1)  |
| N(1)   | 4174(2) | 7415(1)  | 1181(1)  | 36(1)  |
| N(2)   | 3852(2) | 7992(1)  | 1570(1)  | 36(1)  |
| C(1)   | 5221(2) | 6864(1)  | 127(1)   | 33(1)  |
| C(2)   | 5512(2) | 6298(1)  | 562(1)   | 37(1)  |
| C(3)   | 5877(2) | 5724(1)  | 182(2)   | 43(1)  |
| C(4)   | 5943(2) | 5702(1)  | -634(2)  | 47(1)  |
| C(5)   | 5648(2) | 6256(1)  | -1067(2) | 47(1)  |
| C(6)   | 5305(2) | 6838(1)  | -694(1)  | 41(1)  |
| C(7)   | 5154(2) | 8118(1)  | 141(1)   | 34(1)  |
| C(8)   | 6476(2) | 8276(1)  | -13(2)   | 45(1)  |
| C(9)   | 6793(3) | 8860(1)  | -381(2)  | 58(1)  |
| C(10)  | 5802(3) | 9292(1)  | -603(2)  | 62(1)  |
| C(11)  | 4492(3) | 9135(1)  | -452(2)  | 56(1)  |
| C(12)  | 4159(2) | 8554(1)  | -87(1)   | 43(1)  |
| C(13)  | 4811(2) | 7480(1)  | 523(1)   | 33(1)  |
| C(14)  | 3187(2) | 7974(1)  | 2255(1)  | 39(1)  |
| C(15)  | 2731(3) | 7302(1)  | 2528(2)  | 54(1)  |
| C(16)  | 2921(2) | 8529(1)  | 2685(1)  | 43(1)  |
| C(17)  | 3339(2) | 9158(1)  | 2429(1)  | 41(1)  |
| C(18)  | 3072(3) | 9744(1)  | 2966(2)  | 52(1)  |
| F(1)   | 2454(4) | 7336(2)  | 3339(2)  | 62(1)  |
| F(2)   | 1674(3) | 7129(2)  | 2182(2)  | 76(1)  |
| Cl(1)  | 1891(3) | 10270(1) | 2556(1)  | 111(1) |
| F(3)   | 2614(3) | 9564(1)  | 3702(1)  | 84(1)  |
| F(1B)  | 3706(5) | 6922(2)  | 2698(3)  | 67(2)  |
| F(2B)  | 1720(9) | 7343(4)  | 3012(5)  | 101(3) |
| Cl(1B) | 1438(4) | 9958(3)  | 2794(4)  | 80(2)  |
| F(3B)  | 3776(9) | 10295(3) | 2661(5)  | 86(3)  |



**Table S41.** Bond distances [ $\text{\AA}$ ] and angles [ $^\circ$ ] for SUQQEC.

|              | Bond distance ( $\text{\AA}$ ) |                   | Bond angle ( $^\circ$ ) |                    | Bond angle ( $^\circ$ ) |
|--------------|--------------------------------|-------------------|-------------------------|--------------------|-------------------------|
| O(1)-C(17)   | 1.243(3)                       | C(13)-N(1)-N(2)   | 116.16(18)              | F(1B)-C(15)-F(2B)  | 119.4(6)                |
| N(1)-C(13)   | 1.291(3)                       | C(14)-N(2)-N(1)   | 120.41(19)              | F(2)-C(15)-F(1)    | 107.6(3)                |
| N(1)-N(2)    | 1.383(3)                       | C(14)-N(2)-H(2N)  | 117.0(17)               | F(2)-C(15)-C(14)   | 111.3(3)                |
| N(2)-C(14)   | 1.338(3)                       | N(1)-N(2)-H(2N)   | 122.3(17)               | F(1B)-C(15)-C(14)  | 112.6(3)                |
| N(2)-H(2N)   | 0.871(16)                      | C(6)-C(1)-C(2)    | 118.9(2)                | F(2B)-C(15)-C(14)  | 111.5(4)                |
| C(1)-C(6)    | 1.394(3)                       | C(6)-C(1)-C(13)   | 120.0(2)                | F(1)-C(15)-C(14)   | 108.3(3)                |
| C(1)-C(2)    | 1.396(3)                       | C(2)-C(1)-C(13)   | 121.1(2)                | F(2)-C(15)-H(15A)  | 109.9                   |
| C(1)-C(13)   | 1.479(3)                       | C(3)-C(2)-C(1)    | 120.4(2)                | F(1)-C(15)-H(15A)  | 109.9                   |
| C(2)-C(3)    | 1.382(3)                       | C(3)-C(2)-H(2)    | 119.8                   | C(14)-C(15)-H(15A) | 109.9                   |
| C(2)-H(2)    | 0.9500                         | C(1)-C(2)-H(2)    | 119.8                   | F(1B)-C(15)-H(15B) | 103.8                   |
| C(3)-C(4)    | 1.384(4)                       | C(2)-C(3)-C(4)    | 120.3(2)                | F(2B)-C(15)-H(15B) | 103.8                   |
| C(3)-H(3)    | 0.9500                         | C(2)-C(3)-H(3)    | 119.9                   | C(14)-C(15)-H(15B) | 103.8                   |
| C(4)-C(5)    | 1.376(4)                       | C(4)-C(3)-H(3)    | 119.9                   | C(14)-C(16)-C(17)  | 121.7(2)                |
| C(4)-H(4)    | 0.9500                         | C(5)-C(4)-C(3)    | 119.7(2)                | C(14)-C(16)-H(16)  | 119.1                   |
| C(5)-C(6)    | 1.385(3)                       | C(5)-C(4)-H(4)    | 120.2                   | C(17)-C(16)-H(16)  | 119.1                   |
| C(5)-H(5)    | 0.9500                         | C(3)-C(4)-H(4)    | 120.2                   | O(1)-C(17)-C(16)   | 125.2(2)                |
| C(6)-H(6)    | 0.9500                         | C(4)-C(5)-C(6)    | 120.7(2)                | O(1)-C(17)-C(18)   | 116.5(2)                |
| C(7)-C(8)    | 1.387(3)                       | C(4)-C(5)-H(5)    | 119.7                   | C(16)-C(17)-C(18)  | 118.3(2)                |
| C(7)-C(12)   | 1.390(3)                       | C(6)-C(5)-H(5)    | 119.7                   | F(3)-C(18)-C(17)   | 112.9(2)                |
| C(7)-C(13)   | 1.491(3)                       | C(5)-C(6)-C(1)    | 120.1(2)                | F(3B)-C(18)-C(17)  | 108.3(3)                |
| C(8)-C(9)    | 1.377(4)                       | C(5)-C(6)-H(6)    | 119.9                   | F(3B)-C(18)-Cl(1B) | 102.2(5)                |
| C(8)-H(8)    | 0.9500                         | C(1)-C(6)-H(6)    | 119.9                   | C(17)-C(18)-Cl(1B) | 105.3(2)                |
| C(9)-C(10)   | 1.378(4)                       | C(8)-C(7)-C(12)   | 118.9(2)                | F(3)-C(18)-Cl(1)   | 107.3(2)                |
| C(9)-H(9)    | 0.9500                         | C(8)-C(7)-C(13)   | 120.27(19)              | C(17)-C(18)-Cl(1)  | 111.22(18)              |
| C(10)-C(11)  | 1.375(4)                       | C(12)-C(7)-C(13)  | 120.8(2)                | F(3)-C(18)-H(18A)  | 108.4                   |
| C(10)-H(10)  | 0.9500                         | C(9)-C(8)-C(7)    | 120.4(2)                | C(17)-C(18)-H(18A) | 108.4                   |
| C(11)-C(12)  | 1.374(4)                       | C(9)-C(8)-H(8)    | 119.8                   | Cl(1)-C(18)-H(18A) | 108.4                   |
| C(11)-H(11)  | 0.9500                         | C(7)-C(8)-H(8)    | 119.8                   |                    |                         |
| C(12)-H(12)  | 0.9500                         | C(8)-C(9)-C(10)   | 120.4(2)                |                    |                         |
| C(14)-C(16)  | 1.370(3)                       | C(8)-C(9)-H(9)    | 119.8                   |                    |                         |
| C(14)-C(15)  | 1.514(4)                       | C(10)-C(9)-H(9)   | 119.8                   |                    |                         |
| C(15)-F(2)   | 1.260(4)                       | C(11)-C(10)-C(9)  | 119.3(2)                |                    |                         |
| C(15)-F(1B)  | 1.278(5)                       | C(11)-C(10)-H(10) | 120.3                   |                    |                         |
| C(15)-F(2B)  | 1.306(6)                       | C(9)-C(10)-H(10)  | 120.3                   |                    |                         |
| C(15)-F(1)   | 1.403(4)                       | C(12)-C(11)-C(10) | 121.0(2)                |                    |                         |
| C(15)-H(15A) | 1.0000                         | C(12)-C(11)-H(11) | 119.5                   |                    |                         |
| C(15)-H(15B) | 1.0000                         | C(10)-C(11)-H(11) | 119.5                   |                    |                         |
| C(16)-C(17)  | 1.413(4)                       | C(11)-C(12)-C(7)  | 120.0(2)                |                    |                         |
| C(16)-H(16)  | 0.9500                         | C(11)-C(12)-H(12) | 120.0                   |                    |                         |
| C(17)-C(18)  | 1.523(3)                       | C(7)-C(12)-H(12)  | 120.0                   |                    |                         |
| C(18)-F(3)   | 1.378(3)                       | N(1)-C(13)-C(1)   | 116.27(19)              |                    |                         |
| C(18)-F(3B)  | 1.422(7)                       | N(1)-C(13)-C(7)   | 125.23(19)              |                    |                         |
| C(18)-Cl(1B) | 1.719(6)                       | C(1)-C(13)-C(7)   | 118.49(18)              |                    |                         |
| C(18)-Cl(1)  | 1.740(3)                       | N(2)-C(14)-C(16)  | 122.3(2)                |                    |                         |
| C(18)-H(18A) | 1.0000                         | N(2)-C(14)-C(15)  | 116.1(2)                |                    |                         |
| C(18)-H(18B) | 1.0000                         | C(16)-C(14)-C(15) | 121.6(2)                |                    |                         |

**Table S42.** Anisotropic displacement parameters ( $\text{\AA}^2 \times 10^3$ ) for SUQQEC. The anisotropic displacement factor exponent takes the form:  $-2\pi^2 [h^2 a^{*2} U^{11} + \dots + 2 h k a^* b^* U^{12}]$ .

|        | $U^{11}$ | $U^{22}$ | $U^{33}$ | $U^{23}$ | $U^{13}$ | $U^{12}$ |
|--------|----------|----------|----------|----------|----------|----------|
| O(1)   | 46(1)    | 42(1)    | 44(1)    | -3(1)    | 1(1)     | -1(1)    |
| N(1)   | 32(1)    | 34(1)    | 41(1)    | -2(1)    | 4(1)     | 1(1)     |
| N(2)   | 35(1)    | 35(1)    | 39(1)    | 0(1)     | 5(1)     | -1(1)    |
| C(1)   | 23(1)    | 34(1)    | 42(1)    | -1(1)    | 2(1)     | -1(1)    |
| C(2)   | 30(1)    | 37(1)    | 45(1)    | 0(1)     | 1(1)     | -4(1)    |
| C(3)   | 34(1)    | 33(1)    | 63(2)    | 0(1)     | 2(1)     | -3(1)    |
| C(4)   | 39(1)    | 40(1)    | 63(2)    | -12(1)   | 11(1)    | -3(1)    |
| C(5)   | 45(1)    | 50(1)    | 45(1)    | -8(1)    | 11(1)    | -5(1)    |
| C(6)   | 36(1)    | 42(1)    | 43(1)    | 0(1)     | 4(1)     | 1(1)     |
| C(7)   | 31(1)    | 33(1)    | 36(1)    | -1(1)    | 3(1)     | 2(1)     |
| C(8)   | 31(1)    | 41(1)    | 64(2)    | 7(1)     | 6(1)     | 5(1)     |
| C(9)   | 40(1)    | 48(2)    | 87(2)    | 14(1)    | 19(1)    | 0(1)     |
| C(10)  | 63(2)    | 46(2)    | 77(2)    | 23(1)    | 20(2)    | 6(1)     |
| C(11)  | 52(2)    | 54(2)    | 62(2)    | 23(1)    | 10(1)    | 17(1)    |
| C(12)  | 33(1)    | 50(1)    | 47(1)    | 11(1)    | 2(1)     | 8(1)     |
| C(13)  | 24(1)    | 36(1)    | 39(1)    | 1(1)     | -2(1)    | 2(1)     |
| C(14)  | 33(1)    | 46(1)    | 38(1)    | 1(1)     | 4(1)     | 0(1)     |
| C(15)  | 58(2)    | 52(2)    | 52(1)    | 4(1)     | 17(1)    | -5(1)    |
| C(16)  | 42(1)    | 52(1)    | 35(1)    | -2(1)    | 5(1)     | 2(1)     |
| C(17)  | 37(1)    | 47(1)    | 38(1)    | -7(1)    | -4(1)    | 4(1)     |
| C(18)  | 53(2)    | 55(2)    | 48(1)    | -13(1)   | 4(1)     | 1(1)     |
| F(1)   | 77(2)    | 62(2)    | 46(2)    | 12(1)    | 17(1)    | -8(2)    |
| F(2)   | 82(2)    | 80(2)    | 66(2)    | 16(2)    | -16(2)   | -36(2)   |
| Cl(1)  | 150(2)   | 95(1)    | 86(1)    | -37(1)   | -33(1)   | 76(1)    |
| F(3)   | 133(2)   | 67(2)    | 53(1)    | -17(1)   | 29(1)    | 4(2)     |
| F(1B)  | 87(3)    | 55(3)    | 58(3)    | 18(2)    | -17(2)   | -3(2)    |
| F(2B)  | 112(5)   | 75(4)    | 115(7)   | -21(4)   | 81(5)    | -30(4)   |
| Cl(1B) | 64(2)    | 70(3)    | 108(4)   | -38(3)   | 17(2)    | 4(2)     |
| F(3B)  | 126(7)   | 54(4)    | 78(5)    | -21(3)   | 22(4)    | -33(4)   |

**Table S43.** Hydrogen coordinates ( $\times 10^4$ ) and isotropic displacement parameters ( $\text{\AA}^2 \times 10^3$ ) for SUQQEC.

|        | X        | Y       | Z        | U(eq) |
|--------|----------|---------|----------|-------|
| H(2N)  | 4130(20) | 8375(9) | 1409(14) | 44    |
| H(2)   | 5459     | 6308    | 1122     | 45    |
| H(3)   | 6084     | 5343    | 482      | 52    |
| H(4)   | 6190     | 5307    | -894     | 56    |
| H(5)   | 5680     | 6239    | -1628    | 56    |
| H(6)   | 5126     | 7221    | -999     | 49    |
| H(8)   | 7165     | 7981    | 136      | 54    |
| H(9)   | 7701     | 8965    | -482     | 70    |
| H(10)  | 6022     | 9693    | -858     | 74    |
| H(11)  | 3807     | 9433    | -603     | 67    |
| H(12)  | 3249     | 8452    | 9        | 52    |
| H(15A) | 3450     | 6971    | 2429     | 65    |
| H(15B) | 2339     | 7100    | 2042     | 65    |
| H(16)  | 2442     | 8491    | 3167     | 51    |
| H(18A) | 3925     | 9993    | 3034     | 63    |
| H(18B) | 3269     | 9654    | 3535     | 63    |

### 6.2.5.2. CCDC Entry SUQQIG

SUQQIG crystallized in the orthorhombic space group *Pbcn* with two molecules in the asymmetric unit. Coordinates for H2n, the hydrogen atom of the amino group, were taken from the difference Fourier synthesis and H2n was subsequently refined freely. All other hydrogen atoms including H19, the hydrogen atom of the CF<sub>2</sub>H group, were attached to idealized positions. Their isotropic displacement parameters were fixed to 1.2 times the  $U_{eq}$  value of the atoms, to which they are attached. The CF<sub>2</sub>H group was modeled across two positions. The major component of the disorder refined to an occupancy of 64.2%. The terminal CFHCF<sub>3</sub> moiety was also modeled across two positions. The major part refined to an occupancy of 56.9%. Distance and anisotropic displacement parameter restraints were applied to all disordered atoms.

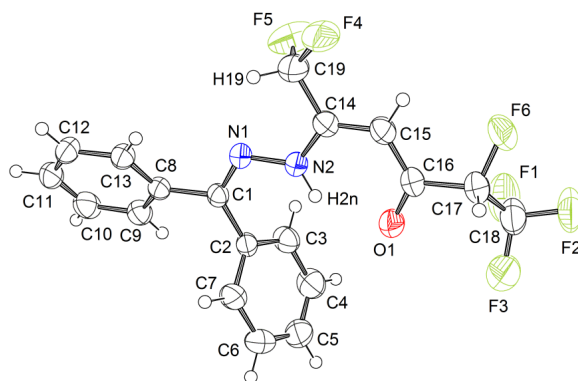**Figure S49.** ORTEP representation of SUQQIG. Thermal ellipsoids are set at 50% probability.

## res-file for the re-refinement of SUQQIG:

```
TITL suqqig_a.res in Pbcn
CELL 0.71073 9.9803 20.8362 17.5990 90.000 90.000 90.000
ZERR 8.000 0.0020 0.0042 0.0035 0.000 0.000 0.000
LATT 1
SYMM 1/2-X, 1/2-Y, 1/2+Z
SYMM -X, Y, 1/2-Z
SYMM 1/2+X, 1/2-Y, -Z
SFAC C H N O F
UNIT 152 112 16 8 48
L.S. 10
BOND $H
LIST 4
ACTA
FMAP 2
PLAN 5
HTAB
HTAB N2 O1
EQIV $1 -x, +y, 1/2-z
FREE F1A F1A_$1
SIMU
RIGU
SADI C18 F1 C18 F2 C18 F3 C18a F1a C18a F2a C18a F3a
SADI 0.04 F1 F2 F2 F3 F3 F1 F1A F2A F2A F3A F3A F1A
SADI C17 F6 C17 F6A
SADI C19 F4 C19 F5 C19 F4a C19 F5a
DFIX 0.89 N2 H2n
WGHT 0.065400 1.037700
FVAR 0.34263 0.56912 0.64207
O1 4 0.390092 0.570803 0.319142 11.00000 0.05849 0.04002 =
0.04639 -0.00422 -0.01117 -0.00030
N1 3 0.408340 0.752995 0.379722 11.00000 0.03981 0.03194 =
0.04179 -0.00251 -0.00485 -0.00252
N2 3 0.379466 0.696597 0.342258 11.00000 0.04252 0.03119 =
0.04162 -0.00131 -0.00799 -0.00070
H2N 2 0.406336 0.657770 0.357945 11.00000 -1.20000
C1 1 0.470258 0.747103 0.443765 11.00000 0.02757 0.03242 =
0.03785 -0.00163 0.00243 -0.00323
C2 1 0.504576 0.684885 0.479944 11.00000 0.03527 0.03278 =
0.03565 -0.00184 -0.00353 -0.00418
C3 1 0.405134 0.644424 0.506912 11.00000 0.03971 0.05120 =
0.05194 0.00988 -0.00128 -0.00811
AFIX 43
H3 2 0.315640 0.656192 0.502156 11.00000 -1.20000
AFIX 0
C4 1 0.437922 0.586928 0.540693 11.00000 0.06296 0.05479 =
0.06528 0.02293 -0.00885 -0.01625
AFIX 43
H4 2 0.370376 0.560224 0.558739 11.00000 -1.20000
AFIX 0
```

|      |    |          |          |          |          |          |           |
|------|----|----------|----------|----------|----------|----------|-----------|
| C5   | 1  | 0.568436 | 0.568826 | 0.547906 | 11.00000 | 0.08009  | 0.04389 = |
|      |    | 0.07320  | 0.01553  | -0.02692 | -0.00407 |          |           |
| AFIX | 43 |          |          |          |          |          |           |
| H5   | 2  | 0.589859 | 0.529772 | 0.570421 | 11.00000 | -1.20000 |           |
| AFIX | 0  |          |          |          |          |          |           |
| C6   | 1  | 0.668090 | 0.608387 | 0.521857 | 11.00000 | 0.05360  | 0.05393 = |
|      |    | 0.10254  | 0.00974  | -0.02580 | 0.00710  |          |           |
| AFIX | 43 |          |          |          |          |          |           |
| H6   | 2  | 0.757258 | 0.596167 | 0.526977 | 11.00000 | -1.20000 |           |
| AFIX | 0  |          |          |          |          |          |           |
| C7   | 1  | 0.636725 | 0.666442 | 0.487963 | 11.00000 | 0.03570  | 0.04717 = |
|      |    | 0.07939  | 0.00721  | -0.00686 | -0.00397 |          |           |
| AFIX | 43 |          |          |          |          |          |           |
| H7   | 2  | 0.704862 | 0.693098 | 0.470544 | 11.00000 | -1.20000 |           |
| AFIX | 0  |          |          |          |          |          |           |
| C8   | 1  | 0.509007 | 0.807482 | 0.482429 | 11.00000 | 0.02769  | 0.03413 = |
|      |    | 0.04461  | -0.00290 | -0.00055 | 0.00000  |          |           |
| C9   | 1  | 0.524276 | 0.808785 | 0.560916 | 11.00000 | 0.04290  | 0.04489 = |
|      |    | 0.04378  | -0.00388 | -0.00364 | 0.00099  |          |           |
| AFIX | 43 |          |          |          |          |          |           |
| H9   | 2  | 0.512005 | 0.771518 | 0.589153 | 11.00000 | -1.20000 |           |
| AFIX | 0  |          |          |          |          |          |           |
| C10  | 1  | 0.557922 | 0.865860 | 0.597204 | 11.00000 | 0.05183  | 0.05876 = |
|      |    | 0.05286  | -0.01864 | -0.01123 | 0.00777  |          |           |
| AFIX | 43 |          |          |          |          |          |           |
| H10  | 2  | 0.565760 | 0.866858 | 0.649848 | 11.00000 | -1.20000 |           |
| AFIX | 0  |          |          |          |          |          |           |
| C11  | 1  | 0.579576 | 0.920581 | 0.555914 | 11.00000 | 0.04717  | 0.04008 = |
|      |    | 0.07732  | -0.02285 | -0.01368 | 0.00659  |          |           |
| AFIX | 43 |          |          |          |          |          |           |
| H11  | 2  | 0.603085 | 0.958419 | 0.580570 | 11.00000 | -1.20000 |           |
| AFIX | 0  |          |          |          |          |          |           |
| C12  | 1  | 0.566643 | 0.919797 | 0.477817 | 11.00000 | 0.04319  | 0.03154 = |
|      |    | 0.07485  | -0.00337 | -0.00224 | 0.00151  |          |           |
| AFIX | 43 |          |          |          |          |          |           |
| H12  | 2  | 0.582117 | 0.956953 | 0.449883 | 11.00000 | -1.20000 |           |
| AFIX | 0  |          |          |          |          |          |           |
| C13  | 1  | 0.530507 | 0.863461 | 0.441066 | 11.00000 | 0.03690  | 0.03538 = |
|      |    | 0.04973  | -0.00325 | 0.00004  | -0.00005 |          |           |
| AFIX | 43 |          |          |          |          |          |           |
| H13  | 2  | 0.520611 | 0.863122 | 0.388523 | 11.00000 | -1.20000 |           |
| AFIX | 0  |          |          |          |          |          |           |
| C14  | 1  | 0.314075 | 0.697692 | 0.275970 | 11.00000 | 0.04108  | 0.04162 = |
|      |    | 0.04100  | 0.00053  | -0.00559 | -0.00137 |          |           |
| C15  | 1  | 0.287567 | 0.643355 | 0.234454 | 11.00000 | 0.05024  | 0.04489 = |
|      |    | 0.03678  | -0.00182 | -0.00984 | -0.00215 |          |           |
| AFIX | 43 |          |          |          |          |          |           |
| H15  | 2  | 0.240916 | 0.647050 | 0.188919 | 11.00000 | -1.20000 |           |
| AFIX | 0  |          |          |          |          |          |           |
| C16  | 1  | 0.329199 | 0.582102 | 0.259027 | 11.00000 | 0.04345  | 0.04327 = |
|      |    | 0.03873  | -0.00623 | -0.00271 | -0.00589 |          |           |

|        |    |          |          |          |           |          |           |
|--------|----|----------|----------|----------|-----------|----------|-----------|
| C17    | 1  | 0.301842 | 0.524518 | 0.207237 | 11.00000  | 0.05797  | 0.04937 = |
|        |    | 0.04781  | -0.01189 | -0.00965 | -0.00378  |          |           |
| PART 1 |    |          |          |          |           |          |           |
| AFIX   | 13 |          |          |          |           |          |           |
| H17A   | 2  | 0.383590 | 0.516804 | 0.177771 | 21.00000  | -1.20000 |           |
| AFIX   | 13 |          |          |          |           |          |           |
| PART 2 |    |          |          |          |           |          |           |
| H17B   | 2  | 0.383785 | 0.499393 | 0.199719 | -21.00000 | -1.20000 |           |
| AFIX   | 0  |          |          |          |           |          |           |
| PART 1 |    |          |          |          |           |          |           |
| F4     | 5  | 0.247202 | 0.760957 | 0.171770 | 31.00000  | 0.11399  | 0.06027 = |
|        |    | 0.05510  | 0.01519  | -0.02918 | 0.01113   |          |           |
| F5     | 5  | 0.161868 | 0.780402 | 0.281162 | 31.00000  | 0.10511  | 0.08874 = |
|        |    | 0.10732  | 0.02087  | 0.01296  | 0.04554   |          |           |
| F6     | 5  | 0.199551 | 0.538049 | 0.155319 | 21.00000  | 0.12727  | 0.06392 = |
|        |    | 0.09265  | -0.00206 | -0.07221 | -0.01017  |          |           |
| PART 2 |    |          |          |          |           |          |           |
| F4A    | 5  | 0.168393 | 0.757443 | 0.199154 | -31.00000 | 0.16074  | 0.07297 = |
|        |    | 0.15814  | -0.02466 | -0.12571 | 0.03824   |          |           |
| F5A    | 5  | 0.373623 | 0.795473 | 0.227597 | -31.00000 | 0.12071  | 0.05973 = |
|        |    | 0.08446  | 0.02803  | 0.02694  | 0.00035   |          |           |
| F6A    | 5  | 0.249594 | 0.541148 | 0.141050 | -21.00000 | 0.15632  | 0.06536 = |
|        |    | 0.04278  | -0.01534 | -0.02659 | -0.01543  |          |           |
| PART 1 |    |          |          |          |           |          |           |
| F1     | 5  | 0.173582 | 0.472345 | 0.298606 | 21.00000  | 0.10519  | 0.08914 = |
|        |    | 0.08504  | -0.01597 | 0.02517  | -0.04073  |          |           |
| F2     | 5  | 0.219630 | 0.421476 | 0.195334 | 21.00000  | 0.12150  | 0.05463 = |
|        |    | 0.07756  | -0.01266 | -0.02219 | -0.03142  |          |           |
| F3     | 5  | 0.375922 | 0.438886 | 0.275344 | 21.00000  | 0.13883  | 0.06495 = |
|        |    | 0.11690  | -0.01302 | -0.05730 | 0.01545   |          |           |
| C18    | 1  | 0.267256 | 0.464996 | 0.243817 | 21.00000  | 0.08373  | 0.05200 = |
|        |    | 0.05600  | -0.00671 | -0.01368 | -0.01437  |          |           |
| PART 2 |    |          |          |          |           |          |           |
| F1A    | 5  | 0.082296 | 0.515013 | 0.257657 | -21.00000 | 0.07225  | 0.13053 = |
|        |    | 0.17281  | -0.06084 | 0.01638  | -0.03347  |          |           |
| F2A    | 5  | 0.156182 | 0.434603 | 0.199164 | -21.00000 | 0.12721  | 0.08197 = |
|        |    | 0.08414  | -0.03655 | -0.01025 | -0.04183  |          |           |
| F3A    | 5  | 0.235603 | 0.457301 | 0.307337 | -21.00000 | 0.17357  | 0.09719 = |
|        |    | 0.07670  | 0.01549  | -0.02798 | -0.06511  |          |           |
| C18A   | 1  | 0.191766 | 0.482818 | 0.242861 | -21.00000 | 0.08470  | 0.06450 = |
|        |    | 0.05476  | -0.02469 | -0.00030 | -0.02190  |          |           |
| PART 0 |    |          |          |          |           |          |           |
| C19    | 1  | 0.270142 | 0.763114 | 0.247965 | 11.00000  | 0.07242  | 0.04876 = |
|        |    | 0.05479  | 0.00332  | -0.01907 | 0.00594   |          |           |
| PART 1 |    |          |          |          |           |          |           |
| AFIX   | 13 |          |          |          |           |          |           |
| H19A   | 2  | 0.340719 | 0.794553 | 0.258613 | 31.00000  | -1.20000 |           |
| AFIX   | 13 |          |          |          |           |          |           |
| PART 2 |    |          |          |          |           |          |           |
| H19B   | 2  | 0.233668 | 0.785362 | 0.292453 | -31.00000 | -1.20000 |           |
| PART 0 |    |          |          |          |           |          |           |

```

AFIX 0
HKLF 4

REM suqqig_a.res in Pbcn
REM R1 = 0.0580 for 2606 Fo > 4sig(Fo) and 0.1140 for all 4419 data
REM 321 parameters refined using 608 restraints

END

WGHT 0.0654 1.0377

REM Instructions for potential hydrogen bonds
HTAB N2 O1
EQIV $2 -x+1, y, -z+1/2
HTAB C17 O1_$2

REM Highest difference peak 0.316, deepest hole -0.170, 1-sigma level 0.039
Q1 1 0.4001 0.4751 0.2302 11.00000 0.05 0.32
Q2 1 0.0916 0.7429 0.2541 11.00000 0.05 0.25
Q3 1 0.5008 0.7768 0.4630 11.00000 0.05 0.24
Q4 1 0.3127 0.5515 0.2359 11.00000 0.05 0.21
Q5 1 0.4859 0.7190 0.4618 11.00000 0.05 0.21

```

**Table S44.** Crystal data and structure refinement for SUQQIG.

|                                   |                                                                 |
|-----------------------------------|-----------------------------------------------------------------|
| Empirical formula                 | C <sub>19</sub> H <sub>14</sub> F <sub>6</sub> N <sub>2</sub> O |
| Formula weight                    | 400.32                                                          |
| Temperature                       | 293(2) K                                                        |
| Wavelength                        | 0.71073 Å                                                       |
| Crystal system                    | Orthorhombic                                                    |
| Space group                       | <i>Pbcn</i>                                                     |
| Unit cell dimensions              |                                                                 |
| a = 9.980(2) Å                    |                                                                 |
| b = 20.836(4) Å                   |                                                                 |
| c = 17.599(4) Å                   |                                                                 |
| Volume                            | 3659.7(13) Å <sup>3</sup>                                       |
| Z                                 | 8                                                               |
| Density (calculated)              | 1.453 Mg/m <sup>3</sup>                                         |
| Absorption coefficient            | 0.133 mm <sup>-1</sup>                                          |
| F(000)                            | 1632                                                            |
| Crystal size                      | 0.450 x 0.150 x 0.100 mm <sup>3</sup>                           |
| Theta range for data collection   | 2.263 to 28.022°                                                |
| Index ranges                      | -13<=h<=12, -27<=k<=10, -9<=l<=23                               |
| Reflections collected             | 18813                                                           |
| Independent reflections           | 4417 [R(int) = 0.0682]                                          |
| Completeness to theta = 25.242°   | 99.90%                                                          |
| Refinement method                 | Full-matrix least-squares on F <sup>2</sup>                     |
| Data / restraints / parameters    | 4417 / 608 / 321                                                |
| Goodness-of-fit on F <sup>2</sup> | 1.013                                                           |
| Final R indices [I>2sigma(I)]     | R1 = 0.0575, wR2 = 0.1294                                       |
| R indices (all data)              | R1 = 0.1137, wR2 = 0.1528                                       |
| Largest diff. peak and hole       | 0.319 and -0.167 e.Å <sup>-3</sup>                              |



**Table S45.** Atomic coordinates ( $\times 10^4$ ) and equivalent isotropic displacement parameters ( $\text{\AA}^2 \times 10^3$ ) for SUQQIG. U(eq) is defined as one third of the trace of the orthogonalized  $U^{ij}$  tensor.

|        | X        | Y       | X       | U(eq)  |
|--------|----------|---------|---------|--------|
| O(1)   | 3901(2)  | 5708(1) | 3191(1) | 48(1)  |
| N(1)   | 4083(2)  | 7530(1) | 3797(1) | 38(1)  |
| N(2)   | 3795(2)  | 6966(1) | 3423(1) | 38(1)  |
| C(1)   | 4703(2)  | 7471(1) | 4438(1) | 33(1)  |
| C(2)   | 5046(2)  | 6849(1) | 4799(1) | 35(1)  |
| C(3)   | 4051(2)  | 6444(1) | 5069(1) | 48(1)  |
| C(4)   | 4379(3)  | 5869(1) | 5407(1) | 61(1)  |
| C(5)   | 5684(3)  | 5688(1) | 5479(2) | 66(1)  |
| C(6)   | 6681(3)  | 6083(1) | 5219(2) | 70(1)  |
| C(7)   | 6367(2)  | 6664(1) | 4880(1) | 54(1)  |
| C(8)   | 5090(2)  | 8075(1) | 4824(1) | 36(1)  |
| C(9)   | 5243(2)  | 8088(1) | 5609(1) | 44(1)  |
| C(10)  | 5579(2)  | 8659(1) | 5972(1) | 54(1)  |
| C(11)  | 5796(2)  | 9206(1) | 5559(2) | 55(1)  |
| C(12)  | 5666(2)  | 9198(1) | 4778(1) | 50(1)  |
| C(13)  | 5305(2)  | 8635(1) | 4411(1) | 41(1)  |
| C(14)  | 3141(2)  | 6977(1) | 2760(1) | 41(1)  |
| C(15)  | 2876(2)  | 6433(1) | 2344(1) | 44(1)  |
| C(16)  | 3292(2)  | 5821(1) | 2590(1) | 42(1)  |
| C(17)  | 3018(3)  | 5245(1) | 2072(1) | 52(1)  |
| F(4)   | 2472(4)  | 7609(2) | 1718(2) | 76(1)  |
| F(5)   | 1619(3)  | 7804(2) | 2812(2) | 100(1) |
| F(6)   | 1996(9)  | 5380(5) | 1553(4) | 95(3)  |
| F(4A)  | 1685(9)  | 7575(4) | 1991(6) | 131(4) |
| F(5A)  | 3736(6)  | 7955(2) | 2276(3) | 88(2)  |
| F(6A)  | 2495(12) | 5412(7) | 1411(5) | 88(3)  |
| F(1)   | 1736(7)  | 4724(4) | 2986(4) | 93(2)  |
| F(2)   | 2196(6)  | 4215(3) | 1954(4) | 84(2)  |
| F(3)   | 3759(5)  | 4389(2) | 2753(2) | 107(2) |
| C(18)  | 2673(7)  | 4650(3) | 2438(3) | 64(1)  |
| F(1A)  | 823(5)   | 5150(3) | 2577(4) | 125(2) |
| F(2A)  | 1562(9)  | 4347(5) | 1991(6) | 98(3)  |
| F(3A)  | 2355(11) | 4573(6) | 3073(5) | 116(4) |
| C(18A) | 1918(10) | 4828(4) | 2429(4) | 68(2)  |
| C(19)  | 2701(3)  | 7631(1) | 2480(1) | 59(1)  |

**Table S46.** Bond distances [ $\text{\AA}$ ] and angles [ $^\circ$ ] for SUQQIG.

|              | Bond distance ( $\text{\AA}$ ) |                   | Bond angle ( $^\circ$ ) |                     | Bond angle ( $^\circ$ ) |
|--------------|--------------------------------|-------------------|-------------------------|---------------------|-------------------------|
| O(1)-C(16)   | 1.242(2)                       | C(1)-N(1)-N(2)    | 115.87(17)              | F(6)-C(17)-C(18)    | 106.9(5)                |
| N(1)-C(1)    | 1.291(2)                       | C(14)-N(2)-N(1)   | 120.31(17)              | F(6A)-C(17)-C(16)   | 112.9(6)                |
| N(1)-N(2)    | 1.378(2)                       | C(14)-N(2)-H(2N)  | 115.3(14)               | F(6)-C(17)-C(16)    | 111.2(5)                |
| N(2)-C(14)   | 1.337(2)                       | N(1)-N(2)-H(2N)   | 124.3(14)               | C(18)-C(17)-C(16)   | 116.8(3)                |
| N(2)-H(2N)   | 0.901(16)                      | N(1)-C(1)-C(8)    | 116.41(17)              | F(6A)-C(17)-C(18A)  | 103.0(6)                |
| C(1)-C(8)    | 1.482(3)                       | N(1)-C(1)-C(2)    | 124.60(17)              | C(16)-C(17)-C(18A)  | 109.1(3)                |
| C(1)-C(2)    | 1.485(3)                       | C(8)-C(1)-C(2)    | 118.99(16)              | F(6)-C(17)-H(17A)   | 107.1                   |
| C(2)-C(7)    | 1.381(3)                       | C(7)-C(2)-C(3)    | 118.6(2)                | C(18)-C(17)-H(17A)  | 107.1                   |
| C(2)-C(3)    | 1.386(3)                       | C(7)-C(2)-C(1)    | 120.49(18)              | C(16)-C(17)-H(17A)  | 107.1                   |
| C(3)-C(4)    | 1.377(3)                       | C(3)-C(2)-C(1)    | 120.87(19)              | F(6A)-C(17)-H(17B)  | 110.5                   |
| C(3)-H(3)    | 0.93                           | C(4)-C(3)-C(2)    | 120.5(2)                | C(16)-C(17)-H(17B)  | 110.5                   |
| C(4)-C(5)    | 1.362(4)                       | C(4)-C(3)-H(3)    | 119.8                   | C(18A)-C(17)-H(17B) | 110.5                   |
| C(4)-H(4)    | 0.93                           | C(2)-C(3)-H(3)    | 119.8                   | F(2)-C(18)-F(3)     | 106.2(5)                |
| C(5)-C(6)    | 1.370(4)                       | C(5)-C(4)-C(3)    | 120.6(2)                | F(2)-C(18)-F(1)     | 106.6(6)                |
| C(5)-H(5)    | 0.93                           | C(5)-C(4)-H(4)    | 119.7                   | F(3)-C(18)-F(1)     | 108.2(6)                |
| C(6)-C(7)    | 1.385(4)                       | C(3)-C(4)-H(4)    | 119.7                   | F(2)-C(18)-C(17)    | 112.7(5)                |
| C(6)-H(6)    | 0.93                           | C(4)-C(5)-C(6)    | 119.8(2)                | F(3)-C(18)-C(17)    | 110.0(5)                |
| C(7)-H(7)    | 0.93                           | C(4)-C(5)-H(5)    | 120.1                   | F(1)-C(18)-C(17)    | 112.8(6)                |
| C(8)-C(9)    | 1.390(3)                       | C(6)-C(5)-H(5)    | 120.1                   | F(1A)-C(18A)-F(2A)  | 106.3(7)                |
| C(8)-C(13)   | 1.392(3)                       | C(5)-C(6)-C(7)    | 120.4(2)                | F(1A)-C(18A)-F(3A)  | 108.0(9)                |
| C(9)-C(10)   | 1.391(3)                       | C(5)-C(6)-H(6)    | 119.8                   | F(2A)-C(18A)-F(3A)  | 106.5(9)                |
| C(9)-H(9)    | 0.93                           | C(7)-C(6)-H(6)    | 119.8                   | F(1A)-C(18A)-C(17)  | 112.9(6)                |
| C(10)-C(11)  | 1.369(4)                       | C(2)-C(7)-C(6)    | 120.2(2)                | F(2A)-C(18A)-C(17)  | 112.7(7)                |
| C(10)-H(10)  | 0.93                           | C(2)-C(7)-H(7)    | 119.9                   | F(3A)-C(18A)-C(17)  | 109.9(8)                |
| C(11)-C(12)  | 1.380(3)                       | C(6)-C(7)-H(7)    | 119.9                   | F(5A)-C(19)-F(4A)   | 118.5(6)                |
| C(11)-H(11)  | 0.93                           | C(9)-C(8)-C(13)   | 119.11(19)              | F(5)-C(19)-F(4)     | 108.5(3)                |
| C(12)-C(13)  | 1.388(3)                       | C(9)-C(8)-C(1)    | 120.10(18)              | F(5)-C(19)-C(14)    | 110.5(3)                |
| C(12)-H(12)  | 0.93                           | C(13)-C(8)-C(1)   | 120.80(17)              | F(5A)-C(19)-C(14)   | 109.3(3)                |
| C(13)-H(13)  | 0.93                           | C(8)-C(9)-C(10)   | 120.0(2)                | F(4A)-C(19)-C(14)   | 110.5(4)                |
| C(14)-C(15)  | 1.373(3)                       | C(8)-C(9)-H(9)    | 120                     | F(4)-C(19)-C(14)    | 109.8(3)                |
| C(14)-C(19)  | 1.515(3)                       | C(10)-C(9)-H(9)   | 120                     | F(5)-C(19)-H(19A)   | 109.4                   |
| C(15)-C(16)  | 1.410(3)                       | C(11)-C(10)-C(9)  | 120.4(2)                | F(4)-C(19)-H(19A)   | 109.4                   |
| C(15)-H(15)  | 0.93                           | C(11)-C(10)-H(10) | 119.8                   | C(14)-C(19)-H(19A)  | 109.4                   |
| C(16)-C(17)  | 1.531(3)                       | C(9)-C(10)-H(10)  | 119.8                   | F(5A)-C(19)-H(19B)  | 105.9                   |
| C(17)-F(6A)  | 1.322(9)                       | C(10)-C(11)-C(12) | 120.3(2)                | F(4A)-C(19)-H(19B)  | 105.9                   |
| C(17)-F(6)   | 1.399(7)                       | C(10)-C(11)-H(11) | 119.9                   | C(14)-C(19)-H(19B)  | 105.9                   |
| C(17)-C(18)  | 1.439(6)                       | C(12)-C(11)-H(11) | 119.9                   |                     |                         |
| C(17)-C(18A) | 1.534(9)                       | C(11)-C(12)-C(13) | 119.9(2)                |                     |                         |
| C(17)-H(17A) | 0.9800                         | C(11)-C(12)-H(12) | 120.1                   |                     |                         |
| C(17)-H(17B) | 0.9800                         | C(13)-C(12)-H(12) | 120.1                   |                     |                         |
| F(4)-C(19)   | 1.361(4)                       | C(12)-C(13)-C(8)  | 120.3(2)                |                     |                         |
| F(5)-C(19)   | 1.280(4)                       | C(12)-C(13)-H(13) | 119.8                   |                     |                         |
| F(4A)-C(19)  | 1.335(6)                       | C(8)-C(13)-H(13)  | 119.8                   |                     |                         |
| F(5A)-C(19)  | 1.285(5)                       | N(2)-C(14)-C(15)  | 122.96(19)              |                     |                         |
| F(1)-C(18)   | 1.352(8)                       | N(2)-C(14)-C(19)  | 116.14(18)              |                     |                         |

|              |           |                   |            |
|--------------|-----------|-------------------|------------|
| F(2)-C(18)   | 1.333(6)  | C(15)-C(14)-C(19) | 120.90(18) |
| F(3)-C(18)   | 1.334(7)  | C(14)-C(15)-C(16) | 121.76(18) |
| F(1A)-C(18A) | 1.308(9)  | C(14)-C(15)-H(15) | 119.1      |
| F(2A)-C(18A) | 1.314(8)  | C(16)-C(15)-H(15) | 119.1      |
| F(3A)-C(18A) | 1.327(10) | O(1)-C(16)-C(15)  | 125.20(19) |
| C(19)-H(19A) | 0.9800    | O(1)-C(16)-C(17)  | 116.49(19) |
| C(19)-H(19B) | 0.9800    | C(15)-C(16)-C(17) | 118.29(18) |

**Table S47.** Anisotropic displacement parameters ( $\text{\AA}^2 \times 10^3$ ) for SUQQIG. The anisotropic displacement factor exponent takes the form:  $-2\pi^2 [h^2 a^{*2} U^{11} + \dots + 2 h k a^* b^* U^{12}]$ .

|        | $U^{11}$ | $U^{22}$ | $U^{33}$ | $U^{23}$ | $U^{13}$ | $U^{12}$ |
|--------|----------|----------|----------|----------|----------|----------|
| O(1)   | 58(1)    | 40(1)    | 46(1)    | -4(1)    | -11(1)   | 0(1)     |
| N(1)   | 40(1)    | 32(1)    | 42(1)    | -2(1)    | -5(1)    | -2(1)    |
| N(2)   | 42(1)    | 31(1)    | 42(1)    | -1(1)    | -8(1)    | -1(1)    |
| C(1)   | 28(1)    | 32(1)    | 38(1)    | -2(1)    | 2(1)     | -3(1)    |
| C(2)   | 35(1)    | 33(1)    | 36(1)    | -2(1)    | -4(1)    | -4(1)    |
| C(3)   | 40(1)    | 51(1)    | 52(1)    | 10(1)    | -1(1)    | -8(1)    |
| C(4)   | 63(2)    | 55(2)    | 65(2)    | 23(1)    | -9(1)    | -16(1)   |
| C(5)   | 80(2)    | 44(1)    | 73(2)    | 16(1)    | -27(1)   | -4(1)    |
| C(6)   | 54(2)    | 54(2)    | 102(2)   | 10(2)    | -26(2)   | 7(1)     |
| C(7)   | 36(1)    | 47(1)    | 79(2)    | 7(1)     | -7(1)    | -4(1)    |
| C(8)   | 28(1)    | 34(1)    | 45(1)    | -3(1)    | -1(1)    | 0(1)     |
| C(9)   | 43(1)    | 45(1)    | 44(1)    | -4(1)    | -4(1)    | 1(1)     |
| C(10)  | 52(1)    | 59(2)    | 53(1)    | -19(1)   | -11(1)   | 8(1)     |
| C(11)  | 47(1)    | 40(1)    | 77(2)    | -23(1)   | -14(1)   | 7(1)     |
| C(12)  | 43(1)    | 32(1)    | 75(2)    | -3(1)    | -2(1)    | 2(1)     |
| C(13)  | 37(1)    | 35(1)    | 50(1)    | -3(1)    | 0(1)     | 0(1)     |
| C(14)  | 41(1)    | 42(1)    | 41(1)    | 1(1)     | -6(1)    | -1(1)    |
| C(15)  | 50(1)    | 45(1)    | 37(1)    | -2(1)    | -10(1)   | -2(1)    |
| C(16)  | 44(1)    | 43(1)    | 39(1)    | -6(1)    | -3(1)    | -6(1)    |
| C(17)  | 58(2)    | 49(1)    | 48(1)    | -12(1)   | -10(1)   | -4(1)    |
| F(4)   | 114(3)   | 60(2)    | 55(1)    | 15(1)    | -29(2)   | 11(2)    |
| F(5)   | 105(2)   | 89(2)    | 107(2)   | 21(2)    | 13(2)    | 45(2)    |
| F(6)   | 128(5)   | 64(3)    | 93(5)    | -2(3)    | -73(5)   | -10(4)   |
| F(4A)  | 161(7)   | 73(4)    | 159(8)   | -25(5)   | -126(6)  | 39(5)    |
| F(5A)  | 121(4)   | 60(3)    | 85(3)    | 28(2)    | 27(3)    | 0(3)     |
| F(6A)  | 157(9)   | 65(4)    | 43(2)    | -15(2)   | -27(4)   | -16(5)   |
| F(1)   | 105(4)   | 89(4)    | 85(4)    | -16(3)   | 25(3)    | -41(3)   |
| F(2)   | 122(5)   | 54(2)    | 77(2)    | -13(2)   | -22(3)   | -31(3)   |
| F(3)   | 139(4)   | 64(2)    | 117(3)   | -13(2)   | -57(3)   | 16(2)    |
| C(18)  | 83(4)    | 52(3)    | 56(3)    | -7(2)    | -14(3)   | -14(3)   |
| F(1A)  | 73(3)    | 130(5)   | 173(5)   | -61(4)   | 17(3)    | -34(3)   |
| F(2A)  | 128(6)   | 82(5)    | 84(3)    | -37(3)   | -11(4)   | -42(4)   |
| F(3A)  | 174(10)  | 97(6)    | 77(4)    | 16(3)    | -28(5)   | -65(6)   |
| C(18A) | 85(5)    | 64(4)    | 55(3)    | -25(3)   | 0(3)     | -22(3)   |
| C(19)  | 72(2)    | 49(2)    | 55(1)    | 3(1)     | -19(1)   | 6(1)     |

**Table S48.** Hydrogen coordinates ( $\times 10^4$ ) and isotropic displacement parameters ( $\text{\AA}^2 \times 10^3$ ) for SUQQIG.

|        | X        | Y       | Z        | U(eq) |
|--------|----------|---------|----------|-------|
| H(2N)  | 4060(20) | 6574(8) | 3579(12) | 46    |
| H(3)   | 3156     | 6561    | 5021     | 57    |
| H(4)   | 3704     | 5602    | 5587     | 73    |
| H(5)   | 5898     | 5297    | 5704     | 79    |
| H(6)   | 7572     | 5961    | 5269     | 84    |
| H(7)   | 7049     | 6931    | 4706     | 65    |
| H(9)   | 5120     | 7715    | 5892     | 53    |
| H(10)  | 5658     | 8669    | 6498     | 65    |
| H(11)  | 6031     | 9584    | 5806     | 66    |
| H(12)  | 5821     | 9570    | 4499     | 60    |
| H(13)  | 5206     | 8632    | 3885     | 49    |
| H(15)  | 2409     | 6470    | 1889     | 53    |
| H(17A) | 3836     | 5168    | 1778     | 62    |
| H(17B) | 3838     | 4994    | 1997     | 62    |
| H(19A) | 3407     | 7946    | 2586     | 70    |
| H(19B) | 2336     | 7854    | 2925     | 70    |

## 7. NMR Spectra

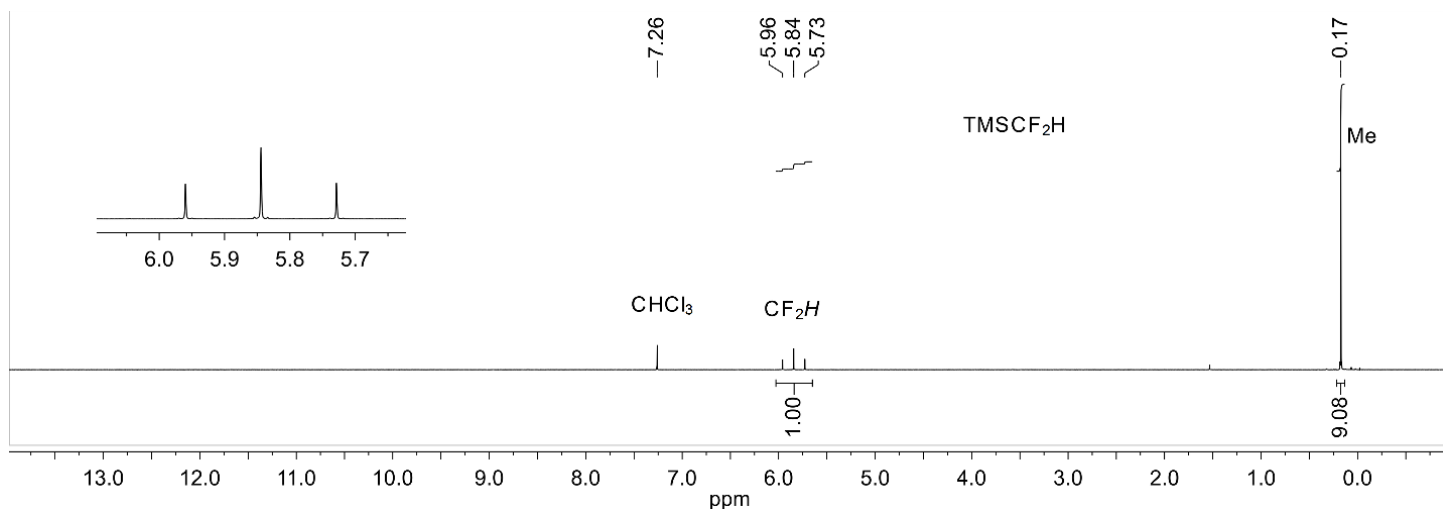

Figure S50.  $^1\text{H}$  NMR spectrum of  $\text{TMSCF}_2\text{H}$ .

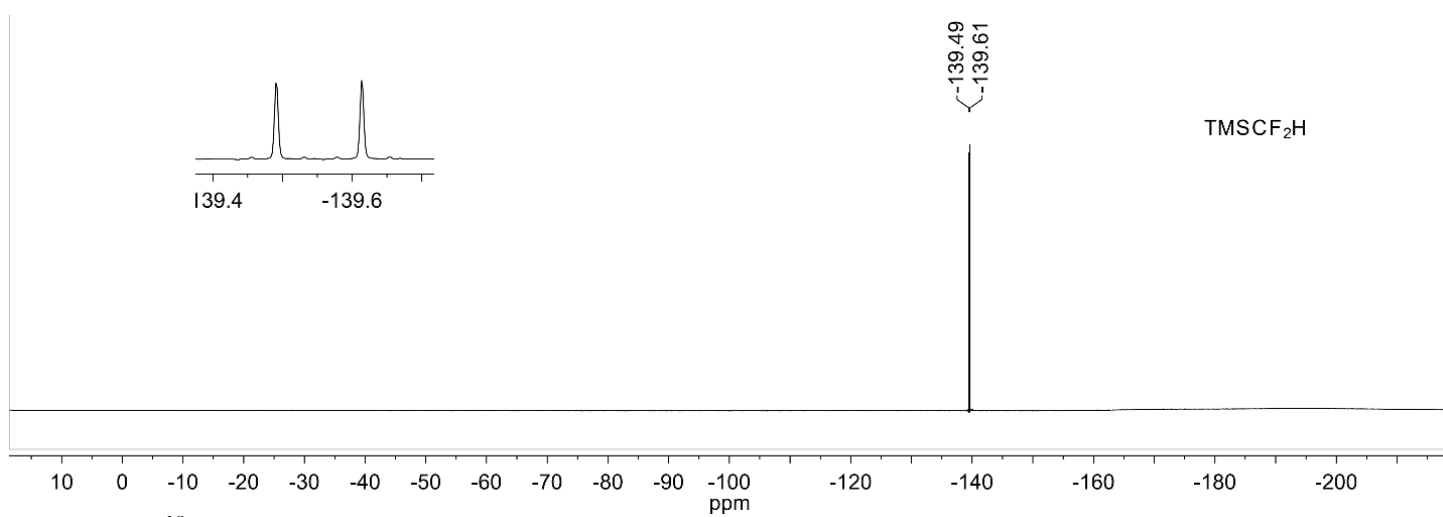

Figure S51.  $^{19}\text{F}$  NMR spectrum of  $\text{TMSCF}_2\text{H}$ .

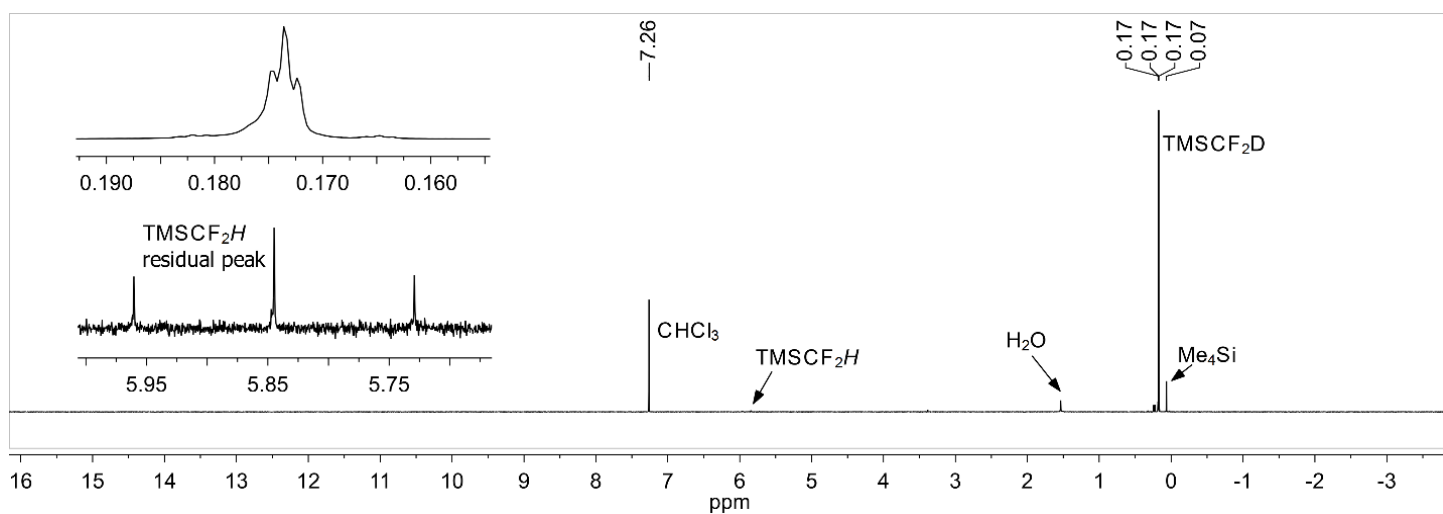

Figure S52.  $^1\text{H}$  NMR spectrum of  $\text{TMSCF}_2\text{D}$ .

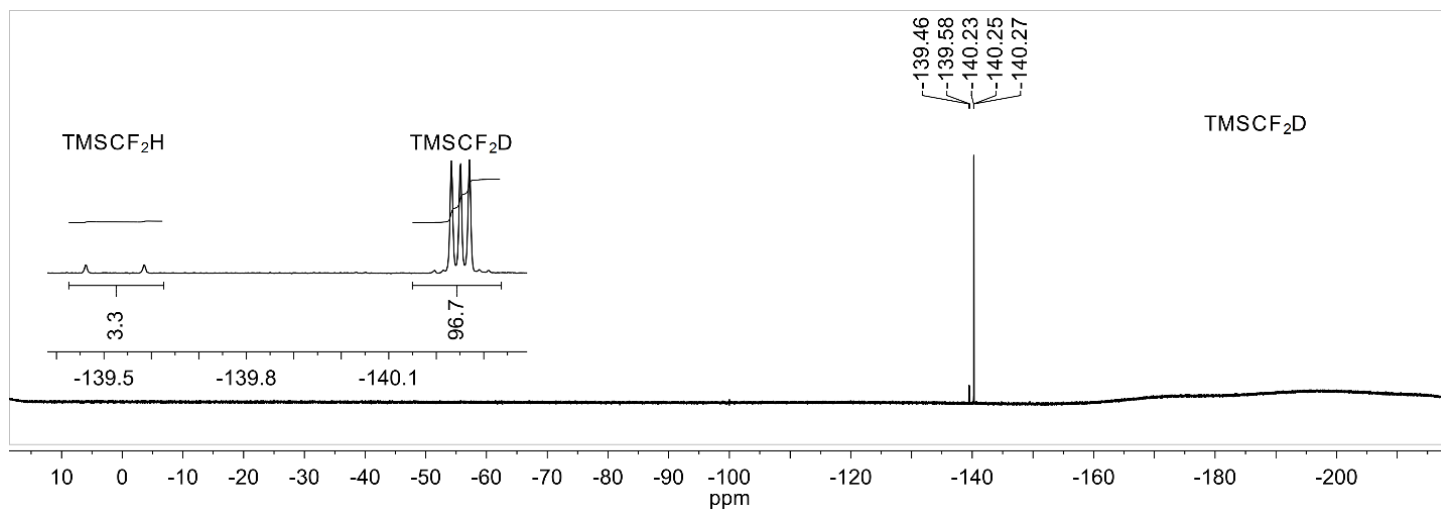

Figure S53.  $^{19}\text{F}$  NMR spectrum of TMSCF<sub>2</sub>D.

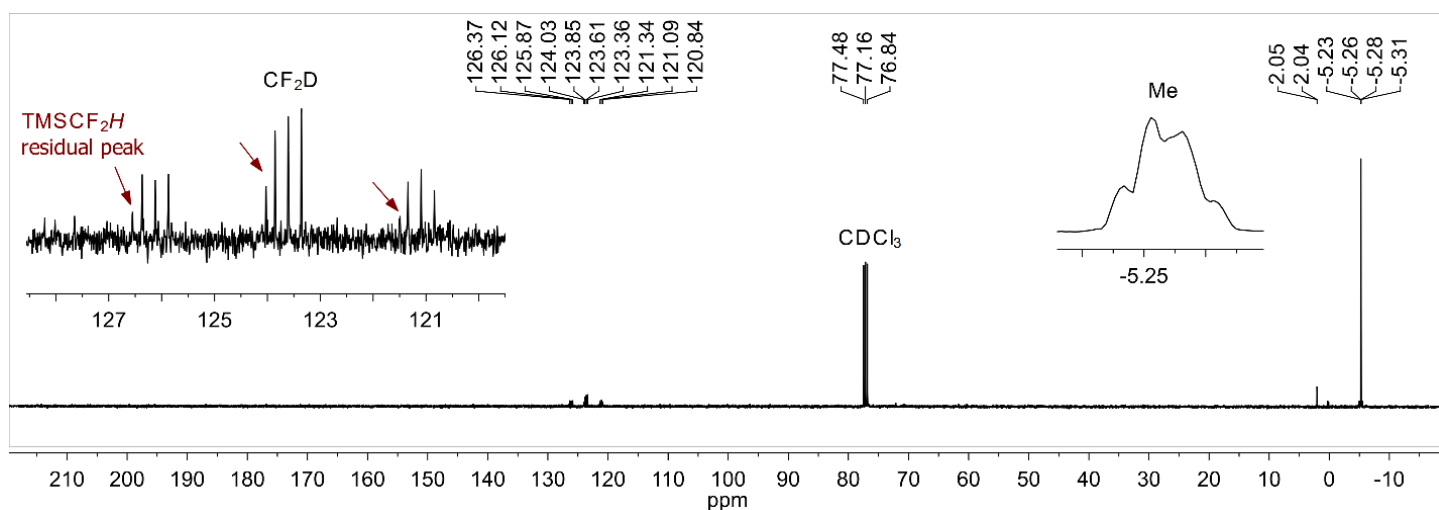

Figure S54.  $^{13}\text{C}\{^1\text{H}\}$  NMR spectrum of TMSCF<sub>2</sub>D.

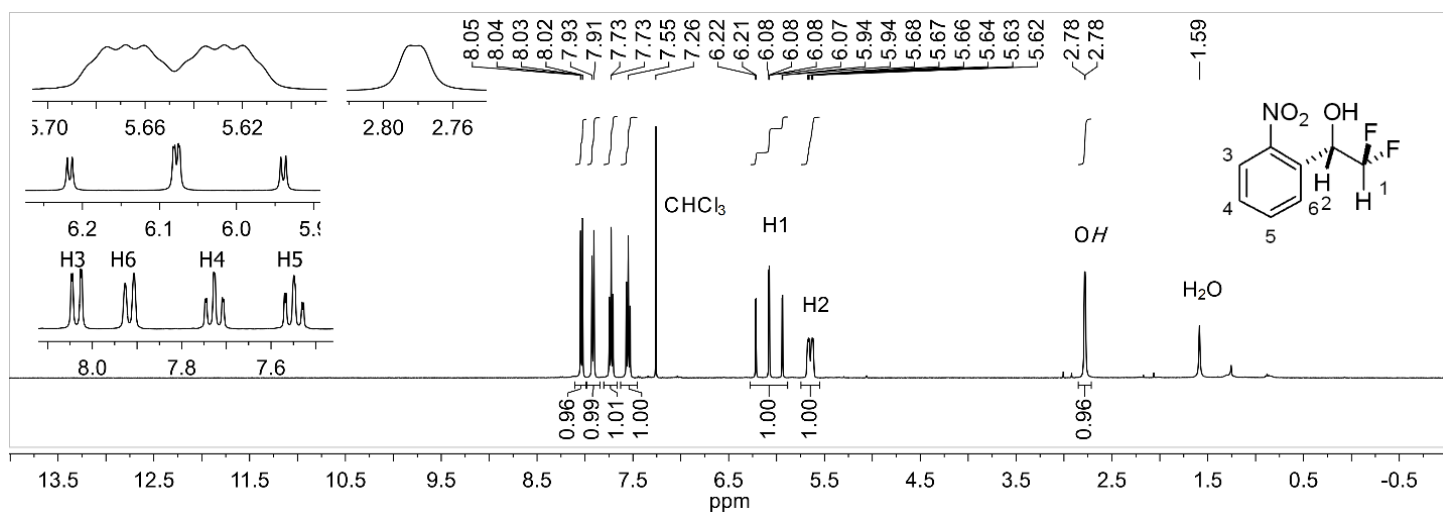

Figure S55.  $^1\text{H}$  NMR spectrum of 2,2-difluoro-1-(2-nitrophenyl)ethan-1-ol (**3-NO<sub>2</sub>**).

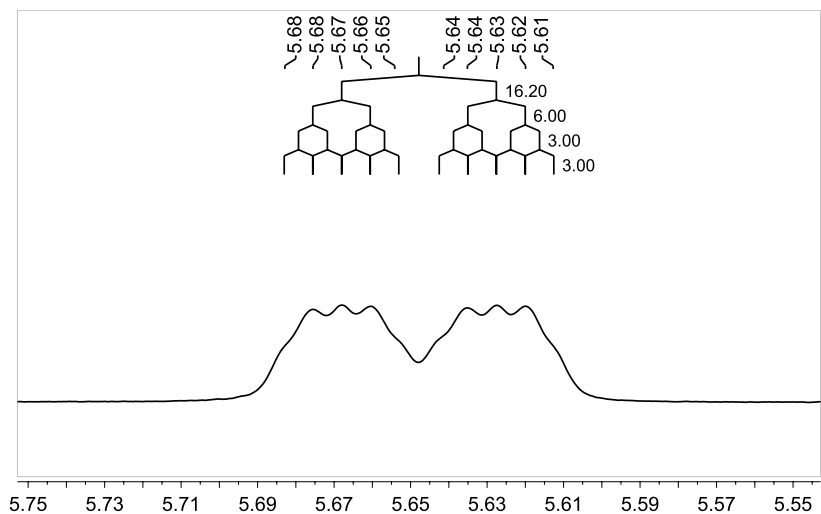

**Figure S56.** Splitting diagram for H2 of 2,2-difluoro-1-(2-nitrophenyl)ethan-1-ol (**3-NO<sub>2</sub>**).

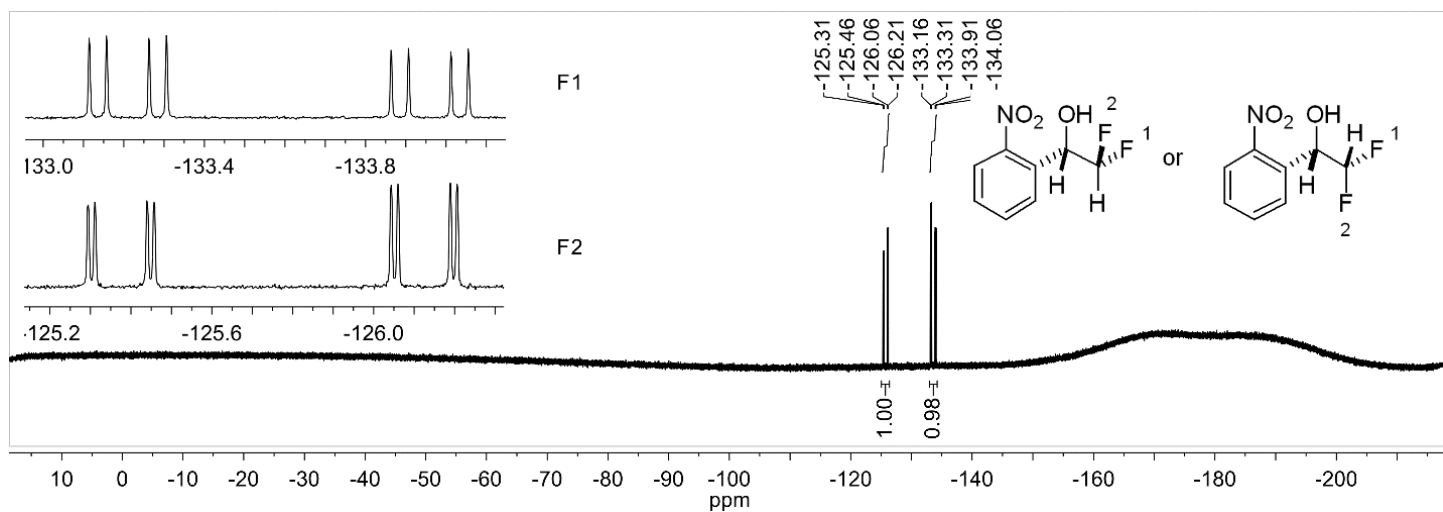

**Figure S57.** <sup>19</sup>F NMR spectrum of 2,2-difluoro-1-(2-nitrophenyl)ethan-1-ol (**3-NO<sub>2</sub>**).

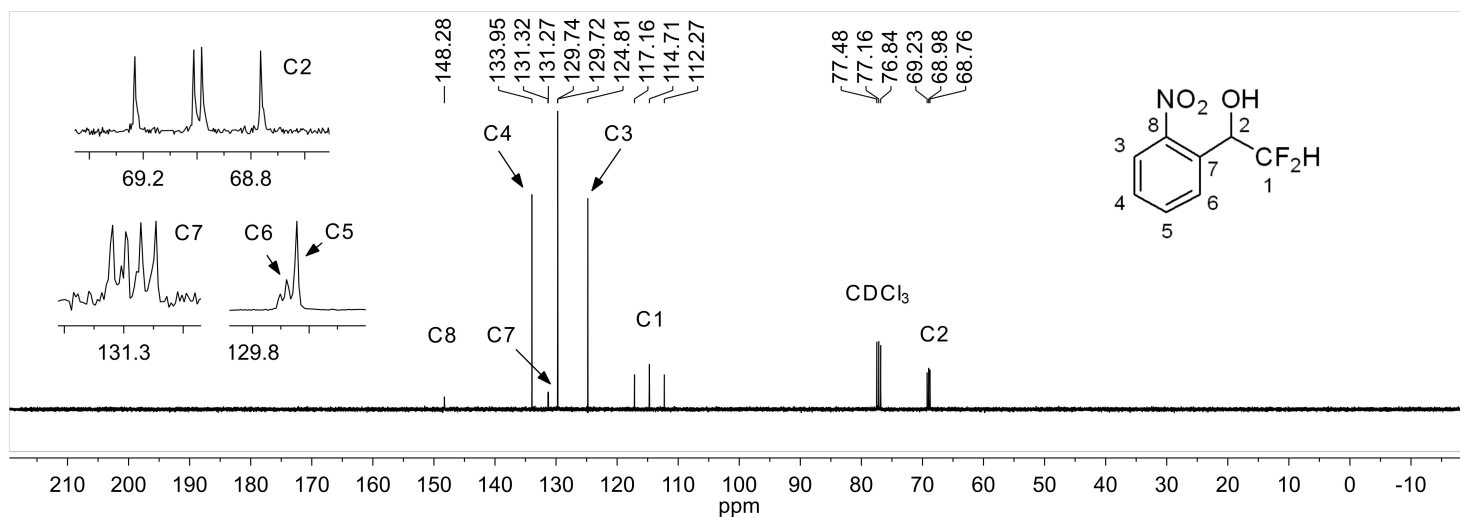

**Figure S58.** <sup>13</sup>C{<sup>1</sup>H} NMR spectrum of 2,2-difluoro-1-(2-nitrophenyl)ethan-1-ol (**3-NO<sub>2</sub>**).

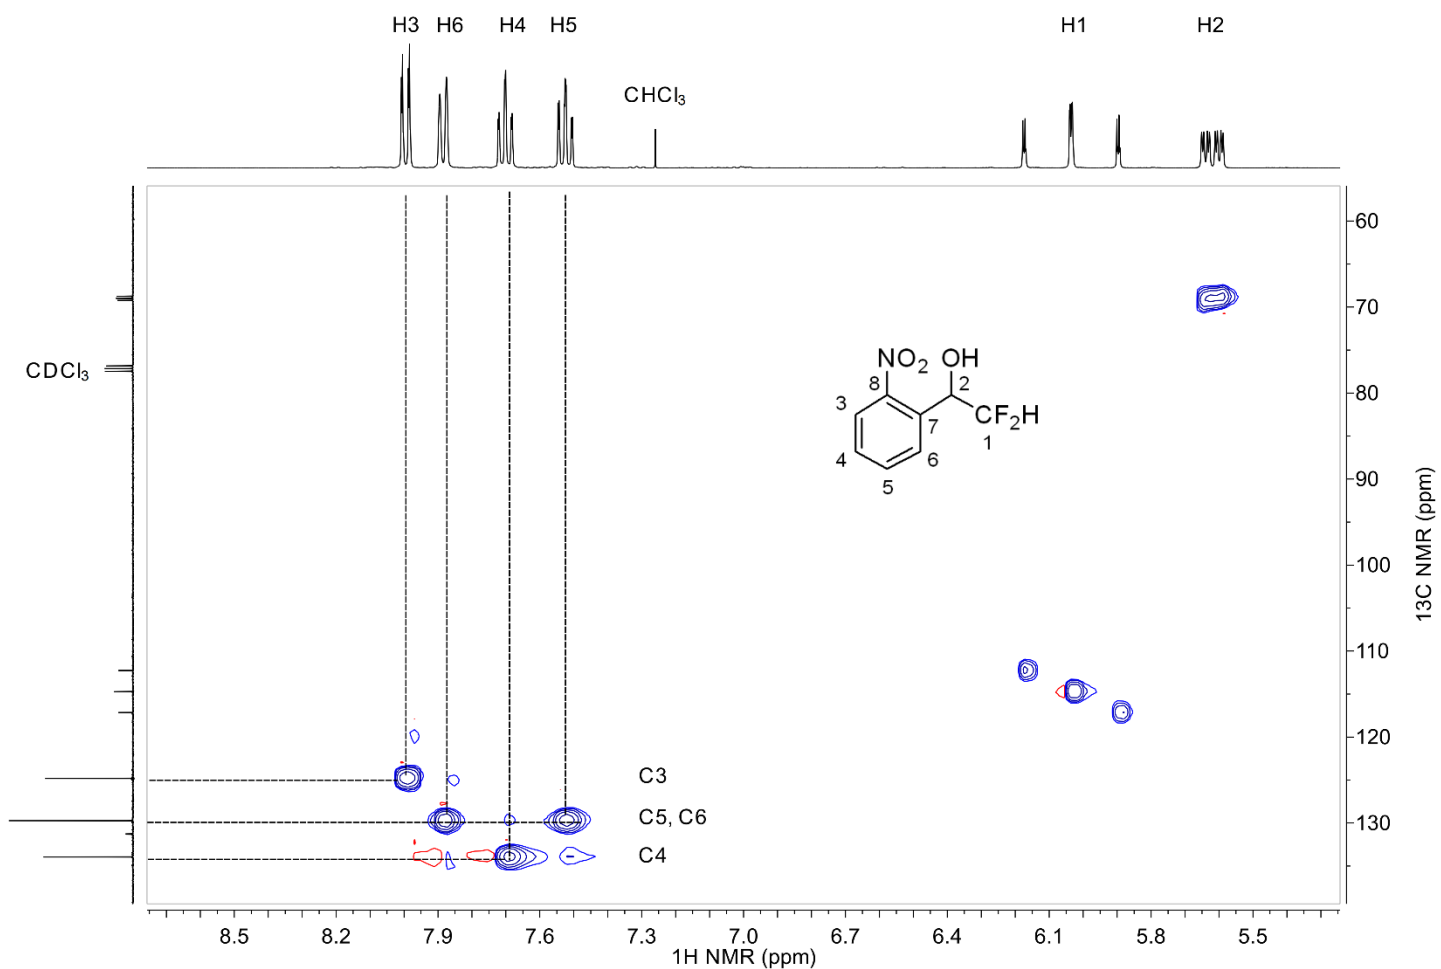

**Figure S59.**  $^1\text{H}$ - $^{13}\text{C}$  HSQC spectrum of 2,2-difluoro-1-(2-nitrophenyl)ethan-1-ol (**3-NO<sub>2</sub>**).

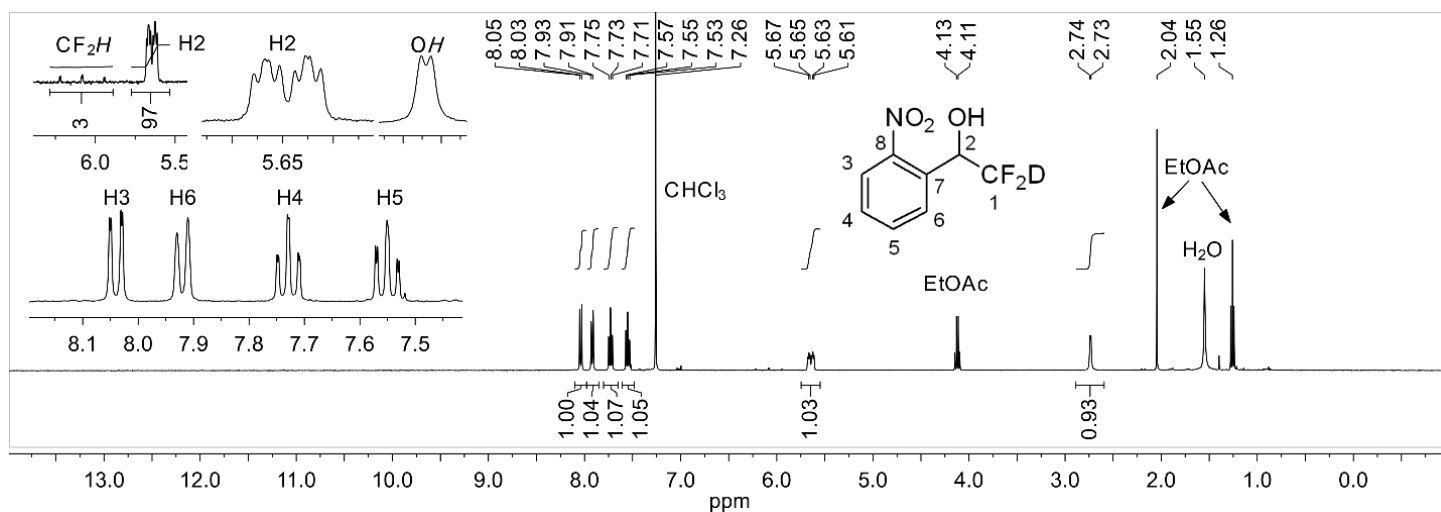

**Figure S60.**  $^1\text{H}$  NMR spectrum of 2,2-difluoro-2-deutero-1-(2-nitrophenyl)ethan-1-ol (**3-NO<sub>2</sub>-D**).



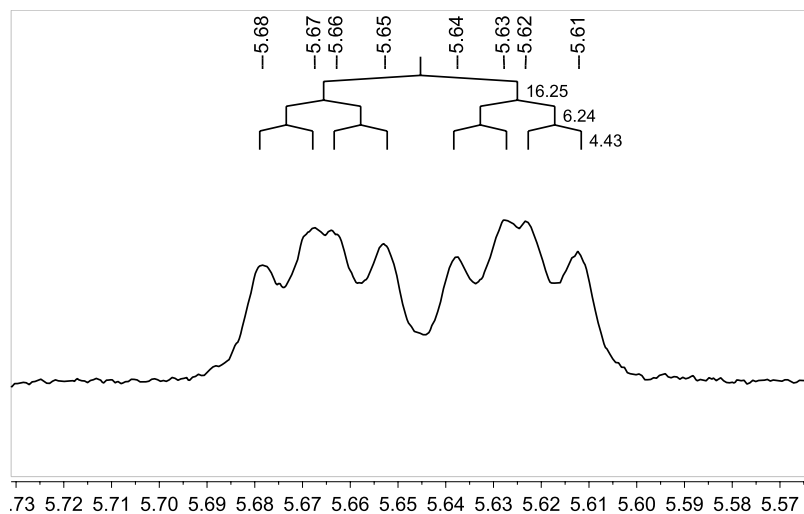

**Figure S61.** Splitting diagram for H2 of 2,2-difluoro-2-deutero-1-(2-nitrophenyl)ethan-1-ol (**3-NO<sub>2</sub>-D**).

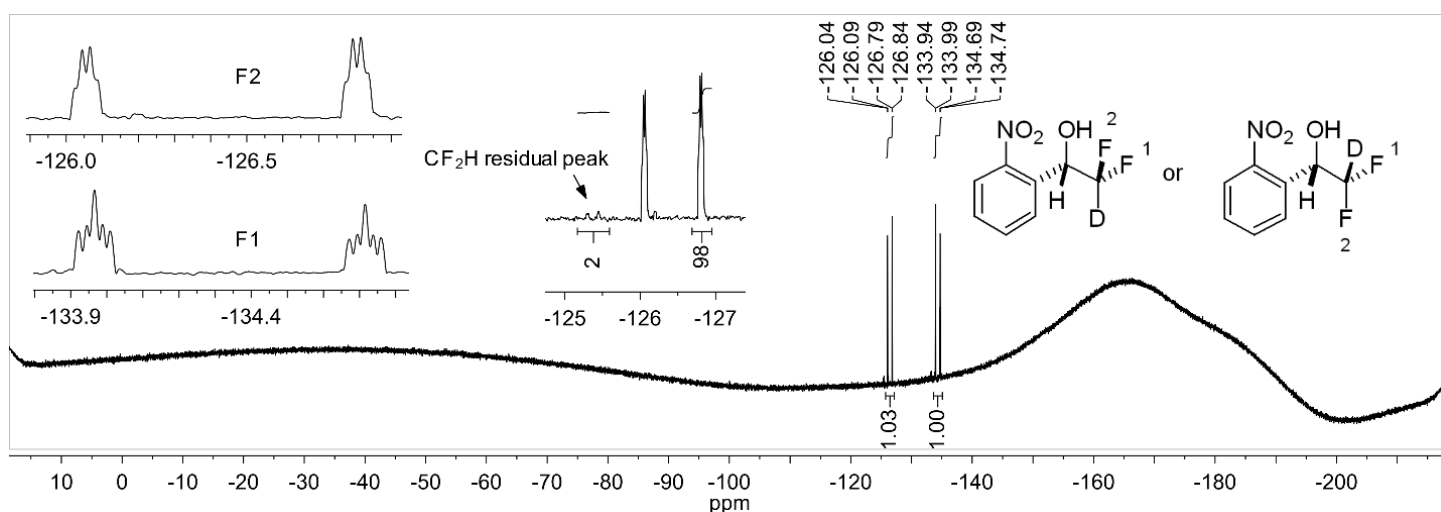

**Figure S62.** <sup>19</sup>F NMR spectrum of 2,2-difluoro-2-deutero-1-(2-nitrophenyl)ethan-1-ol (**3-NO<sub>2</sub>-D**).

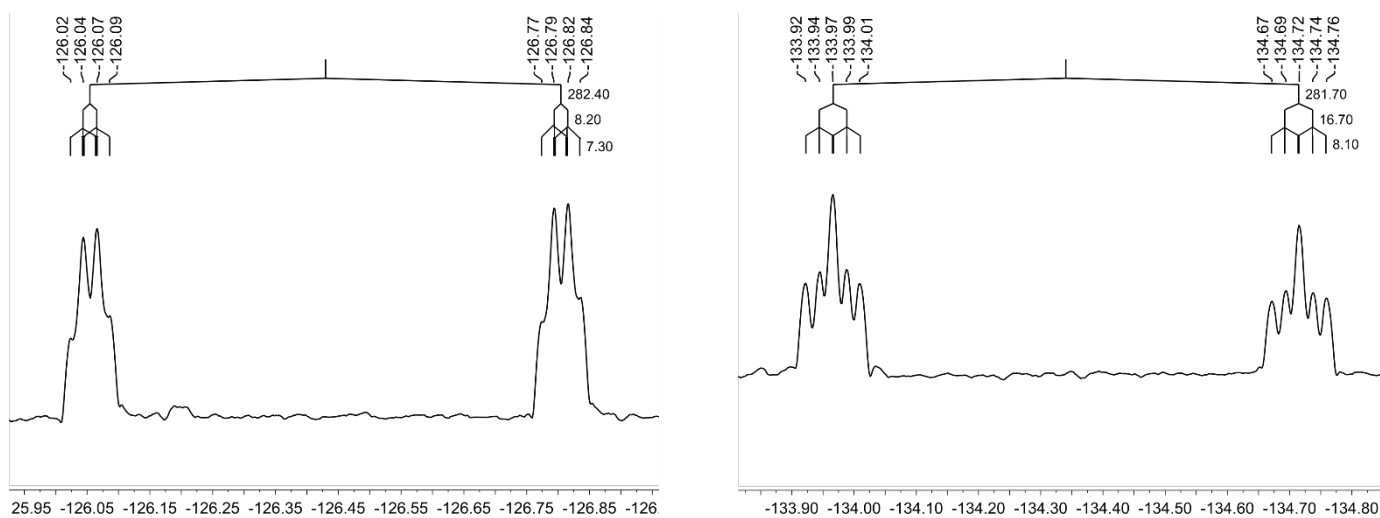

**Figure S63.** Splitting diagrams for F2 (left) and F1 (right) of 2,2-difluoro-2-deutero-1-(2-nitrophenyl)ethan-1-ol (**3-NO<sub>2</sub>-D**).

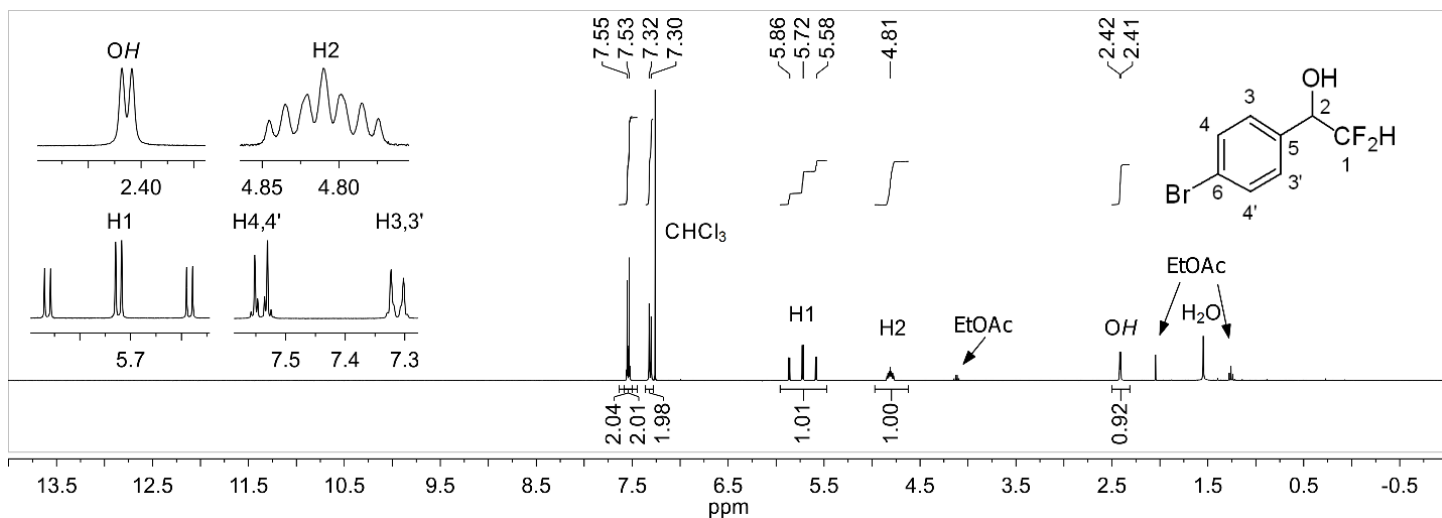

**Figure S64.**  $^1\text{H}$  NMR spectrum of 1-(4-bromophenyl)-2,2-difluoroethan-1-ol (**3-Br**).

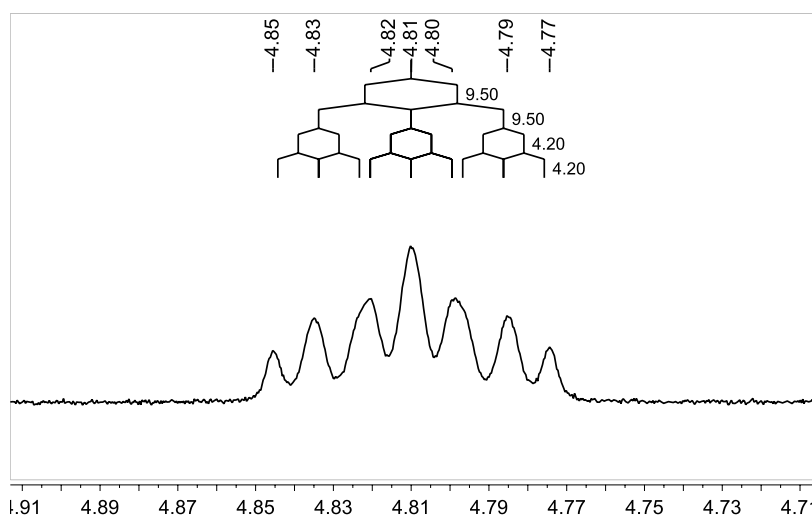

**Figure S65.** Splitting diagram for H2 of 1-(4-bromophenyl)-2,2-difluoroethan-1-ol (**3-Br**).

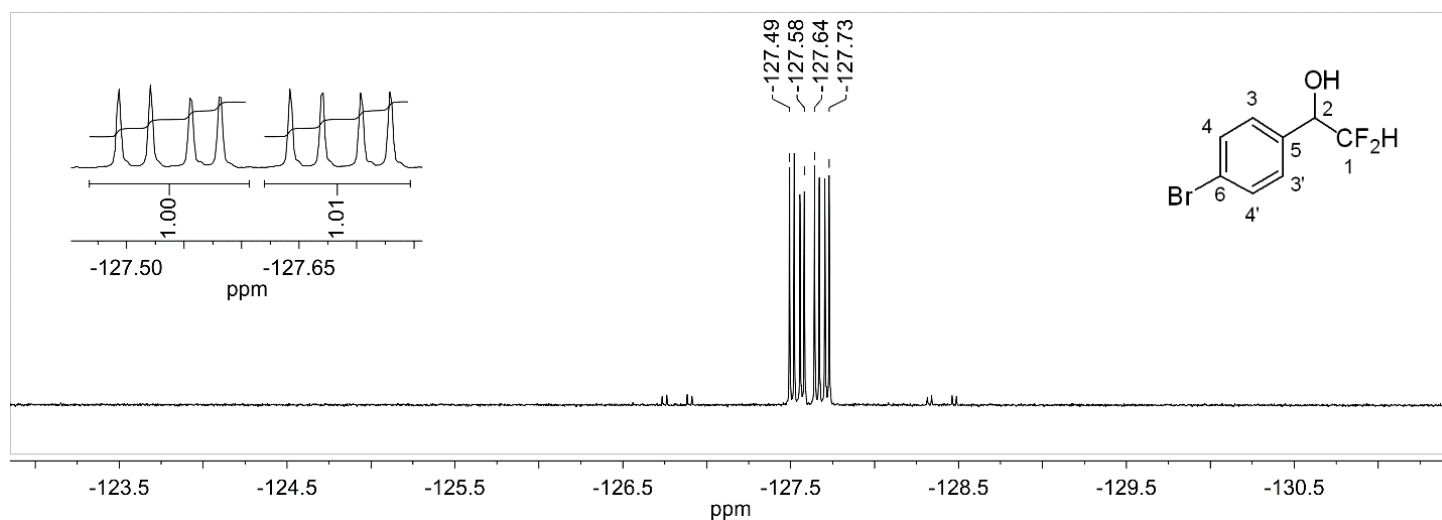

**Figure S66.**  $^{19}\text{F}$  NMR spectrum of 1-(4-bromophenyl)-2,2-difluoroethan-1-ol (**3-Br**).

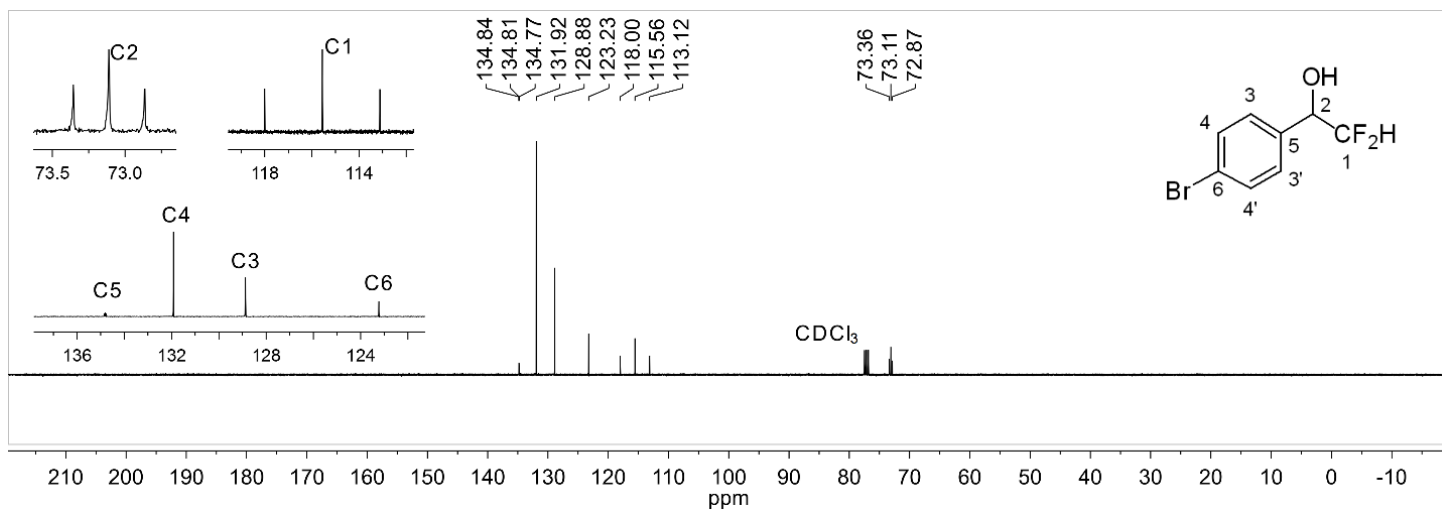

**Figure S67.**  $^{13}\text{C}\{^1\text{H}\}$  NMR spectrum of 1-(4-bromophenyl)-2,2-difluoroethan-1-ol (**3-Br**).

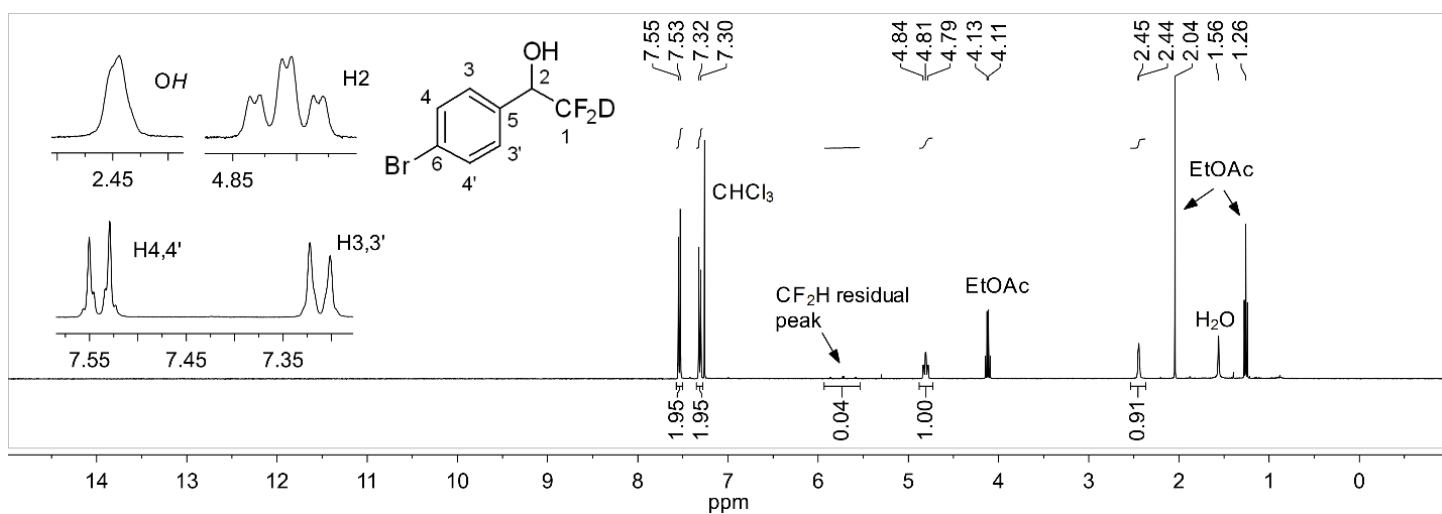

**Figure S68.**  $^1\text{H}$  NMR spectrum of 1-(4-bromophenyl)-2,2-difluoroethan-2-deutero-1-ol (**3-Br-D**).

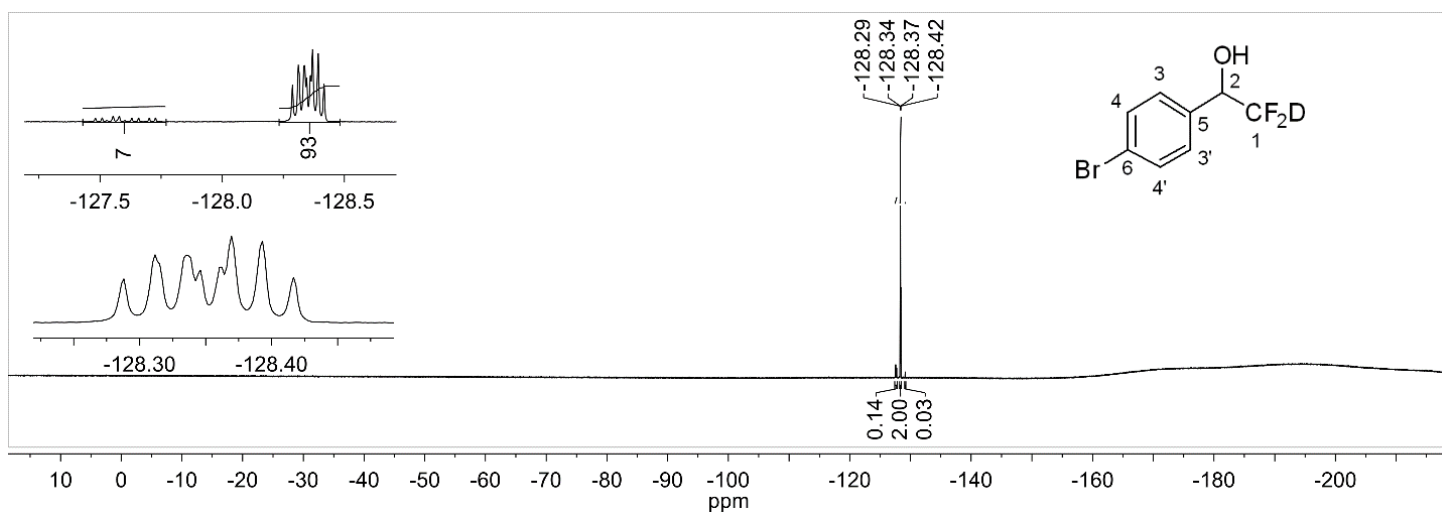

**Figure S69.**  $^{19}\text{F}$  NMR spectrum of 1-(4-bromophenyl)-2,2-difluoroethan-2-deutero-1-ol (**3-Br-D**).

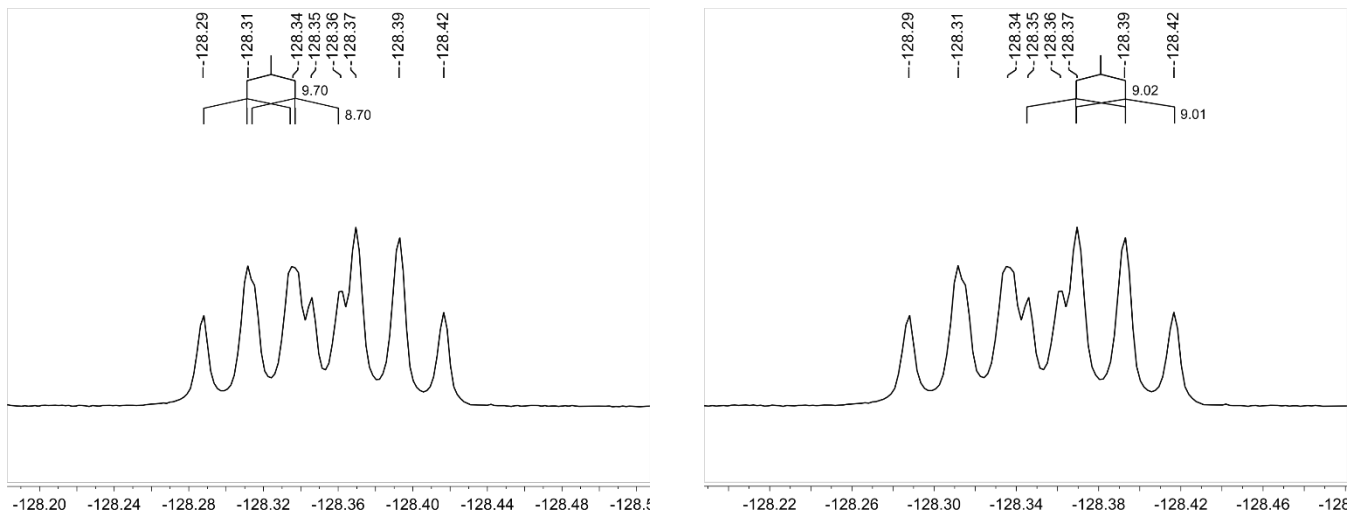

**Figure S70.** Splitting diagrams for Fa (left) and Fb (right) of 2,2-difluoro-2-deutero-1-(2-nitrophenyl)ethan-1-ol (**3-Br-D**).

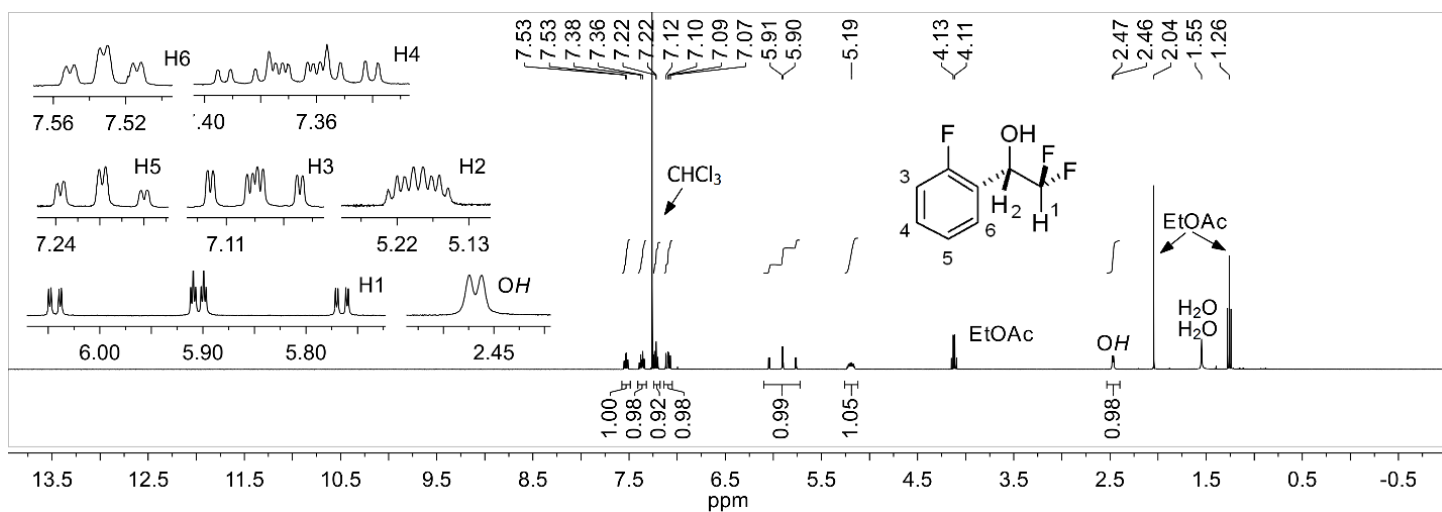

**Figure S71.**  $^1\text{H}$  NMR spectrum of 2,2-difluoro-1-(2-fluorophenyl)ethan-1-ol (**3-F**).

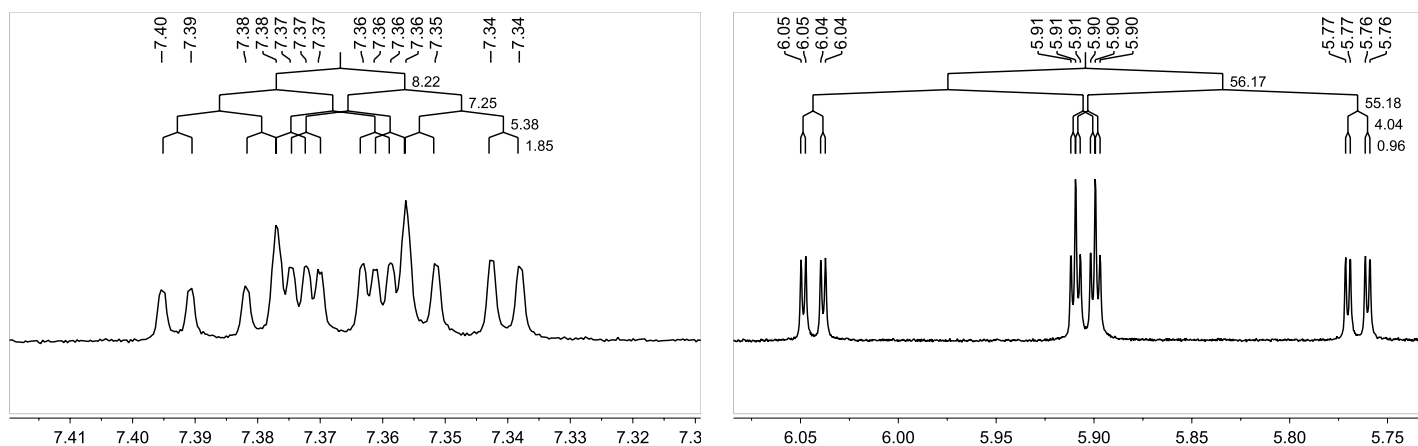

**Figure S72.** Splitting diagrams for H4 (left) and H1 (right) of 2,2-difluoro-1-(2-fluorophenyl)ethan-1-ol (**3-F**).

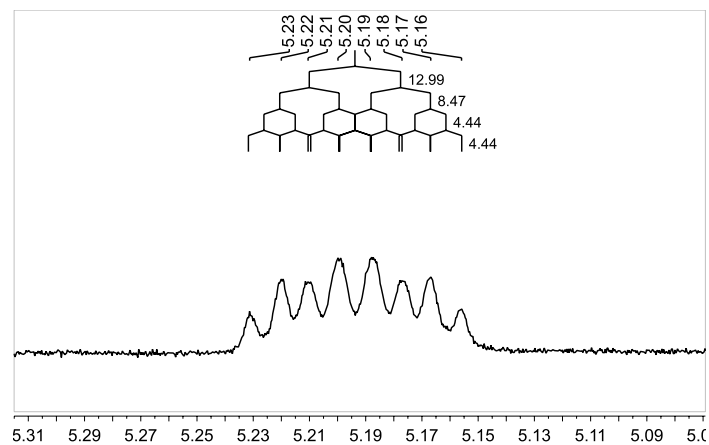

**Figure S73.** Splitting diagram for H2 of 2,2-difluoro-1-(2-fluorophenyl)ethan-1-ol (**3-F**).

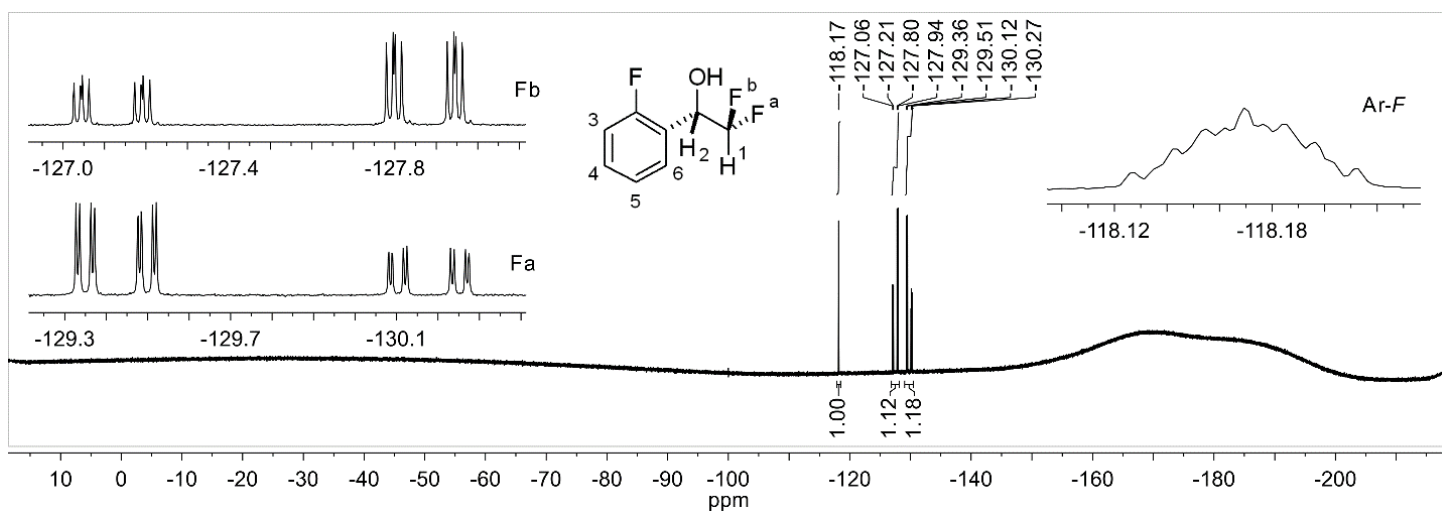

**Figure S74.**  $^{19}\text{F}$  NMR spectrum of 2,2-difluoro-1-(2-fluorophenyl)ethan-1-ol (**3-F**).

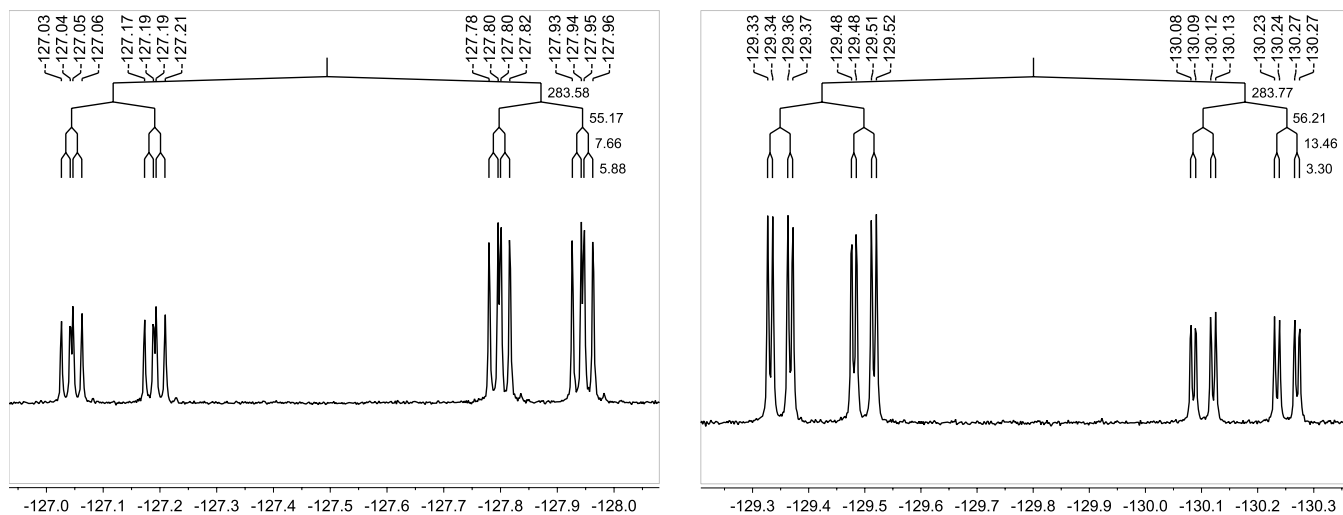

**Figure S75.** Splitting diagrams for Fb (left) and Fa (right) of 2,2-difluoro-1-(2-fluorophenyl)ethan-1-ol (**3-F**).

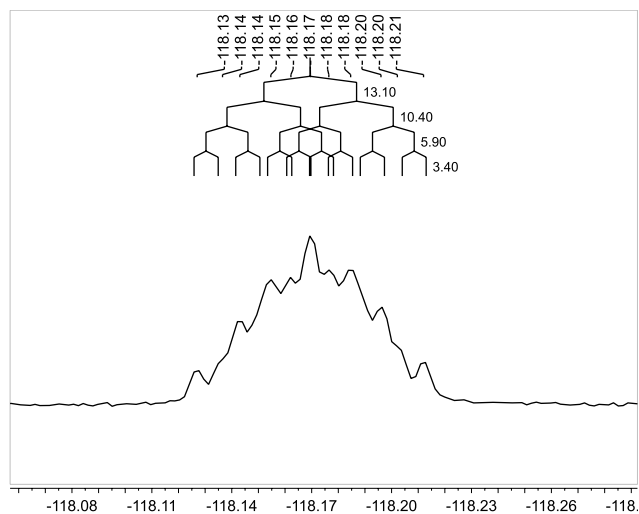

**Figure S76.** Splitting diagram for  $F_{Ar}$  of 2,2-difluoro-1-(2-fluorophenyl)ethan-1-ol (**3-F**).

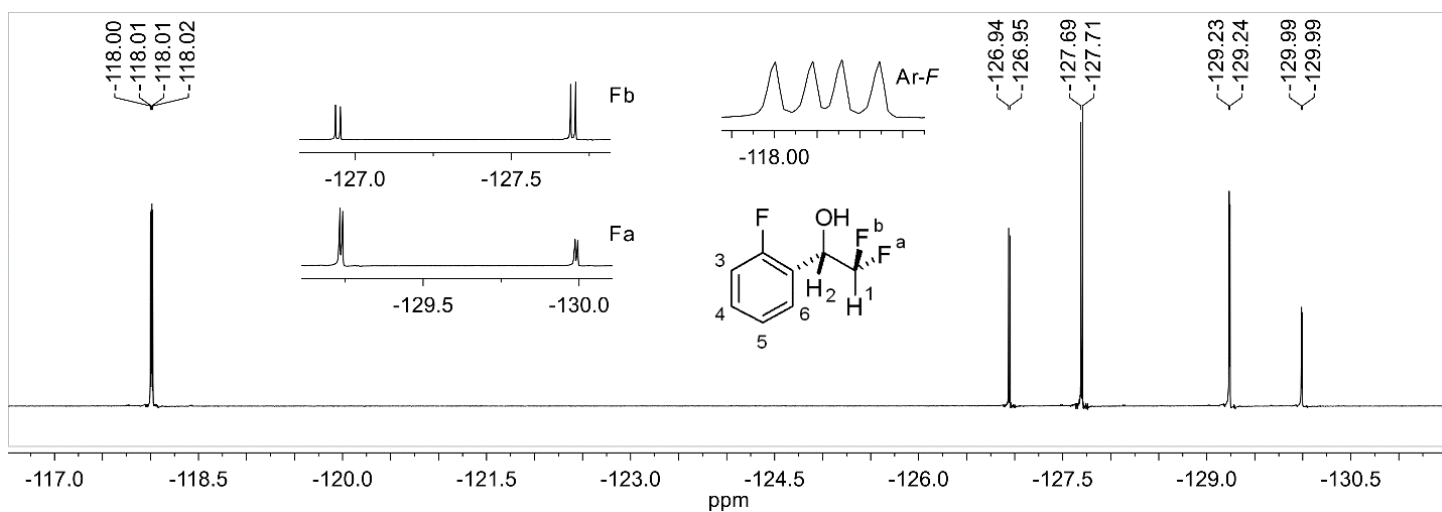

**Figure S77.**  $^{19}F\{^1H\}$  NMR spectrum of 2,2-difluoro-1-(2-fluorophenyl)ethan-1-ol (**3-F**).

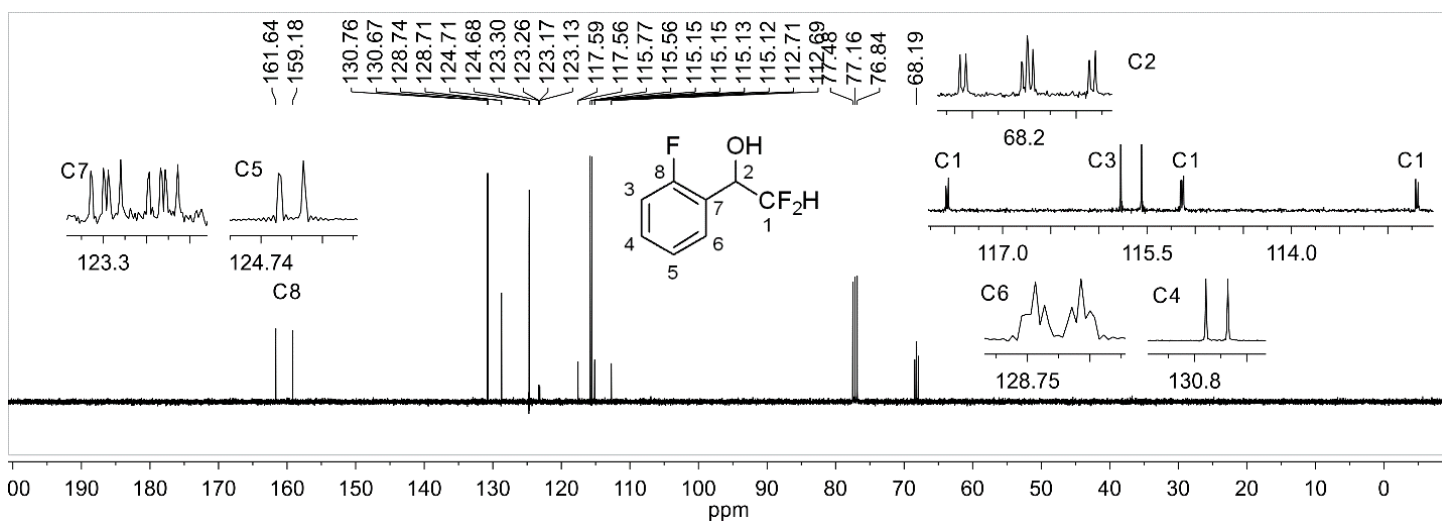

**Figure S78.**  $^{13}C\{^1H\}$  NMR spectrum of 2,2-difluoro-1-(2-fluorophenyl)ethan-1-ol (**3-F**).

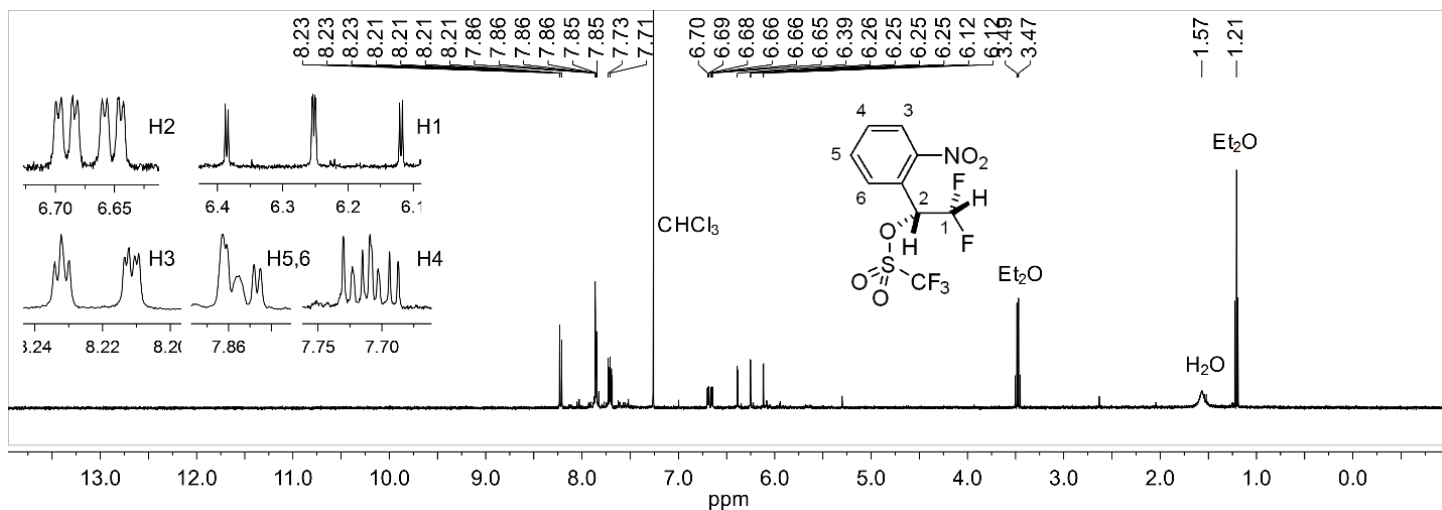

Figure S79.  $^1\text{H}$  NMR spectrum of 2,2-difluoro-1-(2-nitrophenyl)ethyl triflate (**4-NO<sub>2</sub>**).

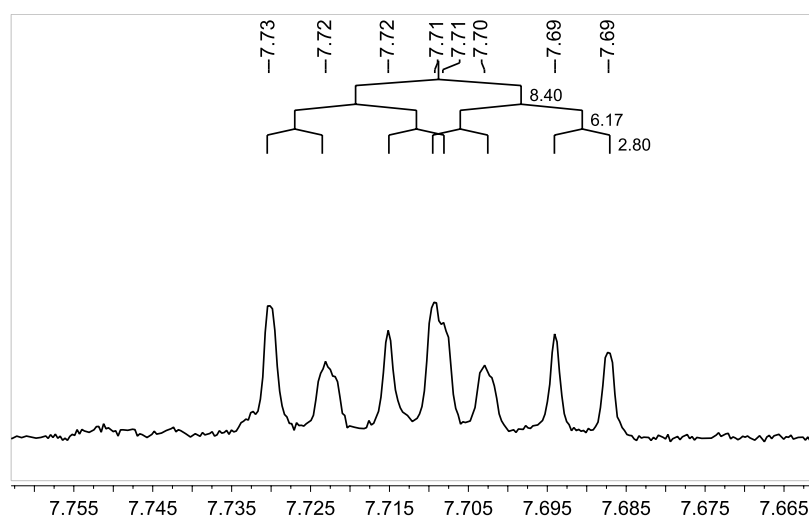

Figure S80. Splitting diagram for H4 of 2,2-difluoro-1-(2-fluorophenyl)ethan-1-ol (**4-NO<sub>2</sub>**).

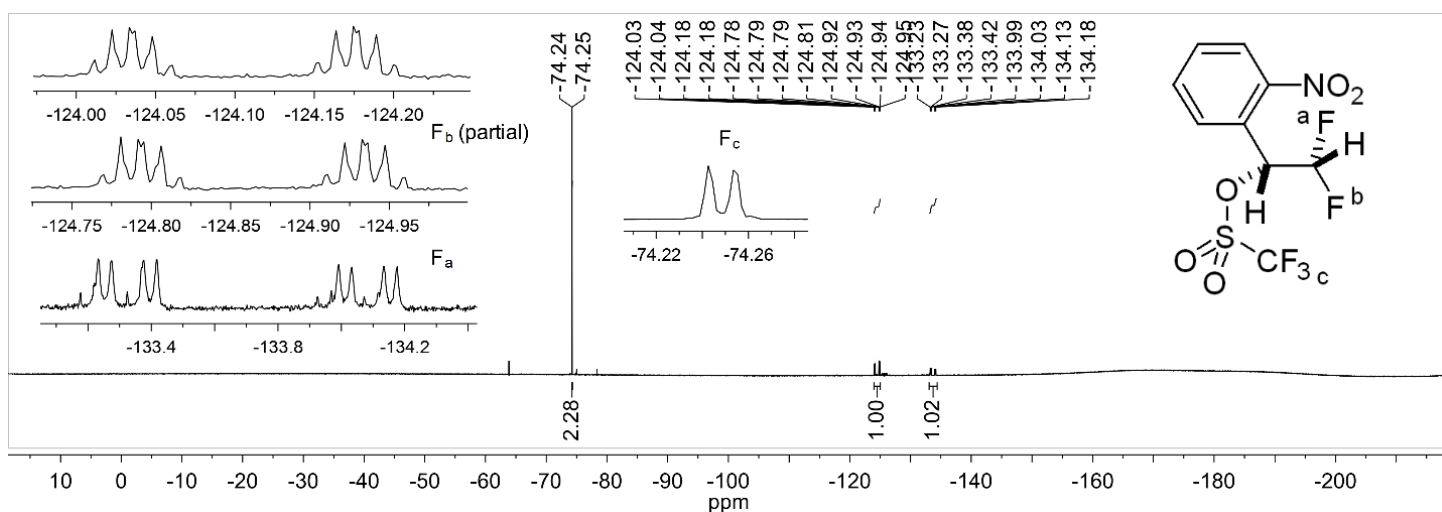

Figure S81.  $^{19}\text{F}$  NMR spectrum of 2,2-difluoro-1-(2-nitrophenyl)ethyl triflate (**4-NO<sub>2</sub>**).

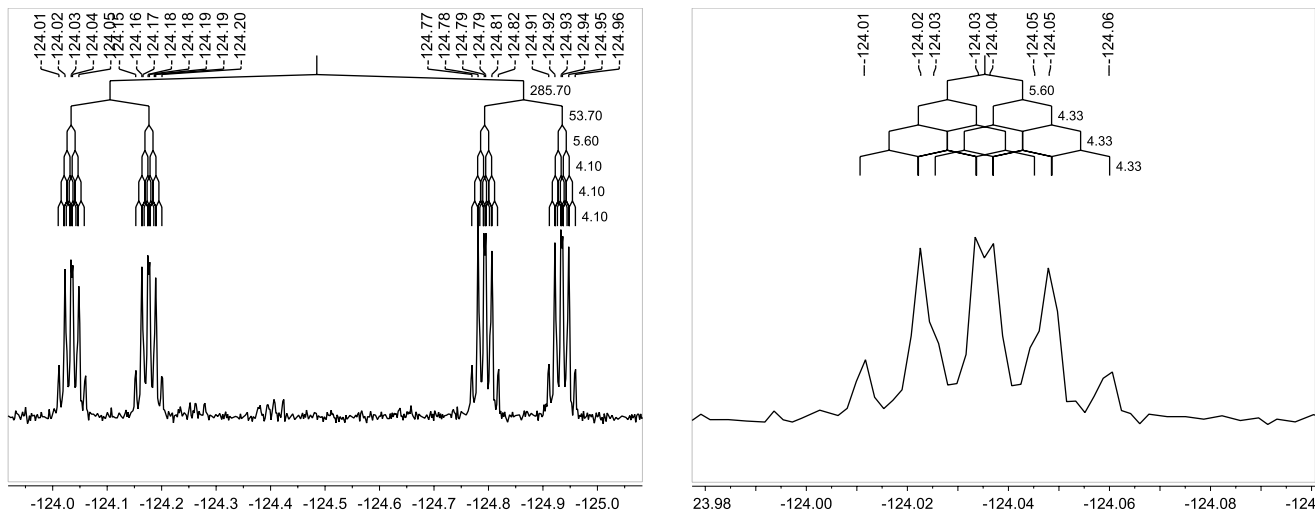

**Figure S82.** Splitting diagrams for Fb of 2,2-difluoro-1-(2-nitrophenyl)ethyl triflate (**4-NO<sub>2</sub>**). Left: full signal; right: expansion of the part of the signal.

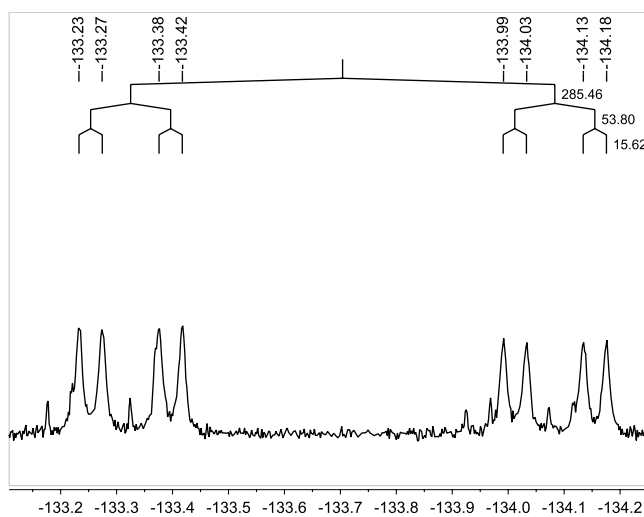

**Figure S83.** Splitting diagram for Fa of 2,2-difluoro-1-(2-nitrophenyl)ethyl triflate (**4-NO<sub>2</sub>**).

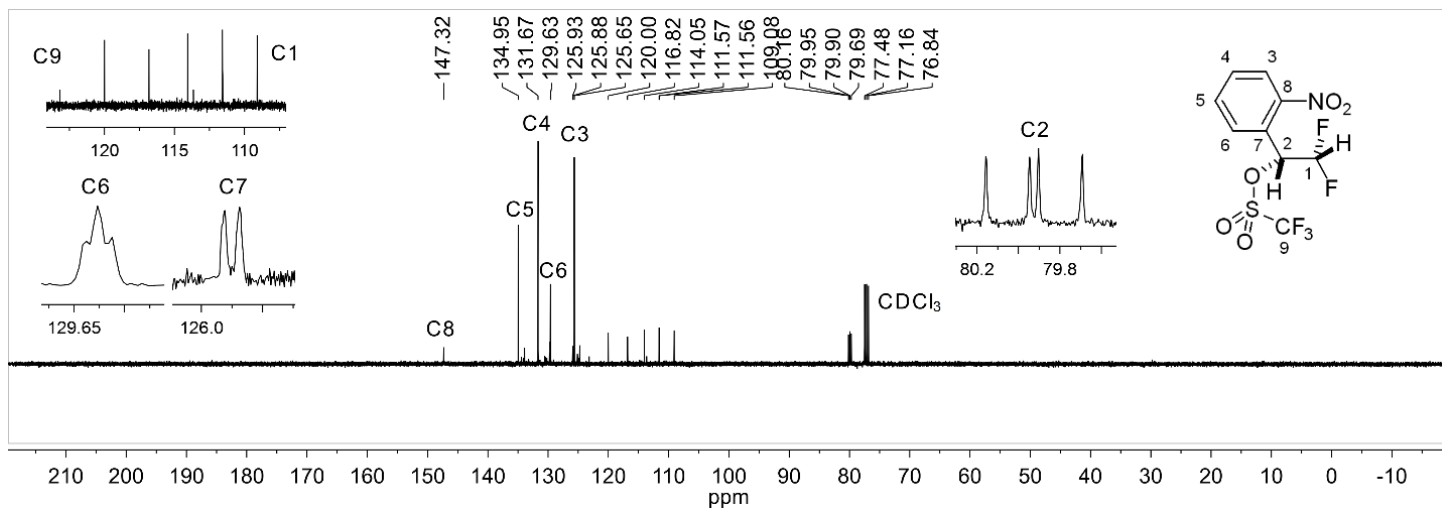

**Figure S84.**  $^{13}\text{C}\{^1\text{H}\}$  NMR spectrum of 2,2-difluoro-1-(2-nitrophenyl)ethyl triflate (**4-NO<sub>2</sub>**).



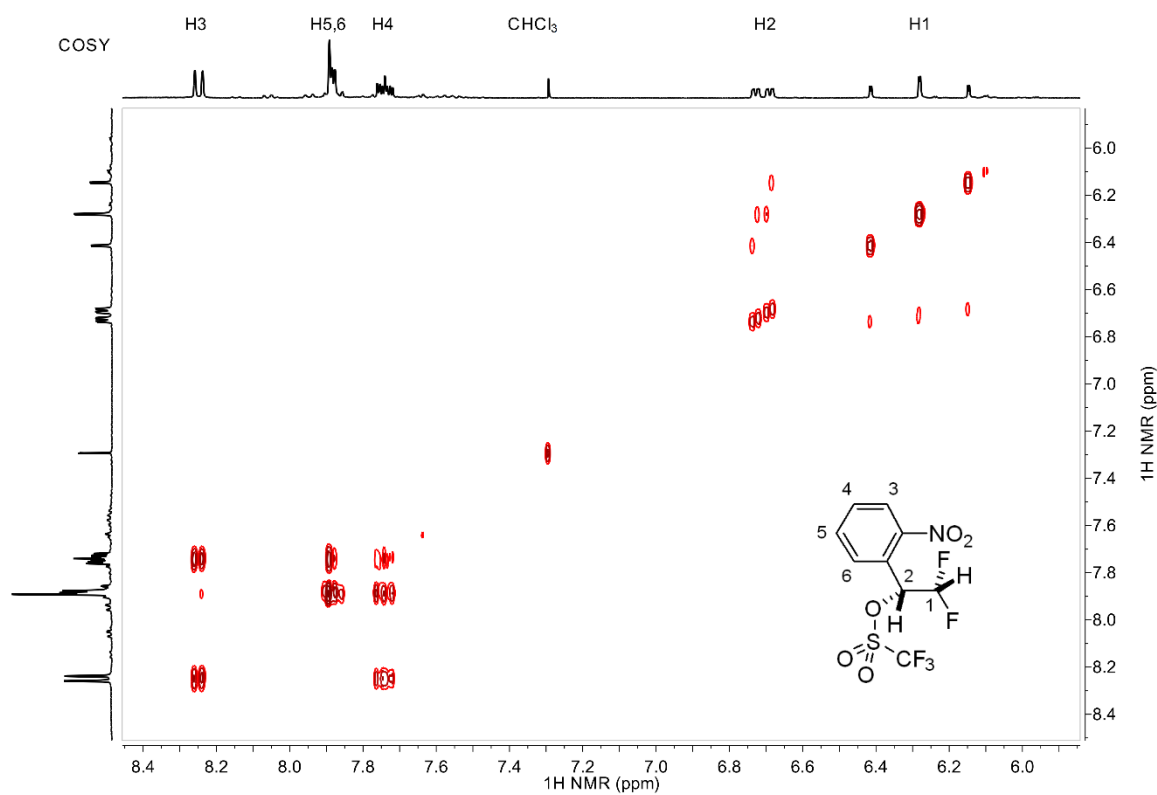

**Figure S85.**  $^1\text{H}$ - $^1\text{H}$  COSY spectrum of 2,2-difluoro-1-(2-nitrophenyl)ethyl triflate (**4-NO<sub>2</sub>**).

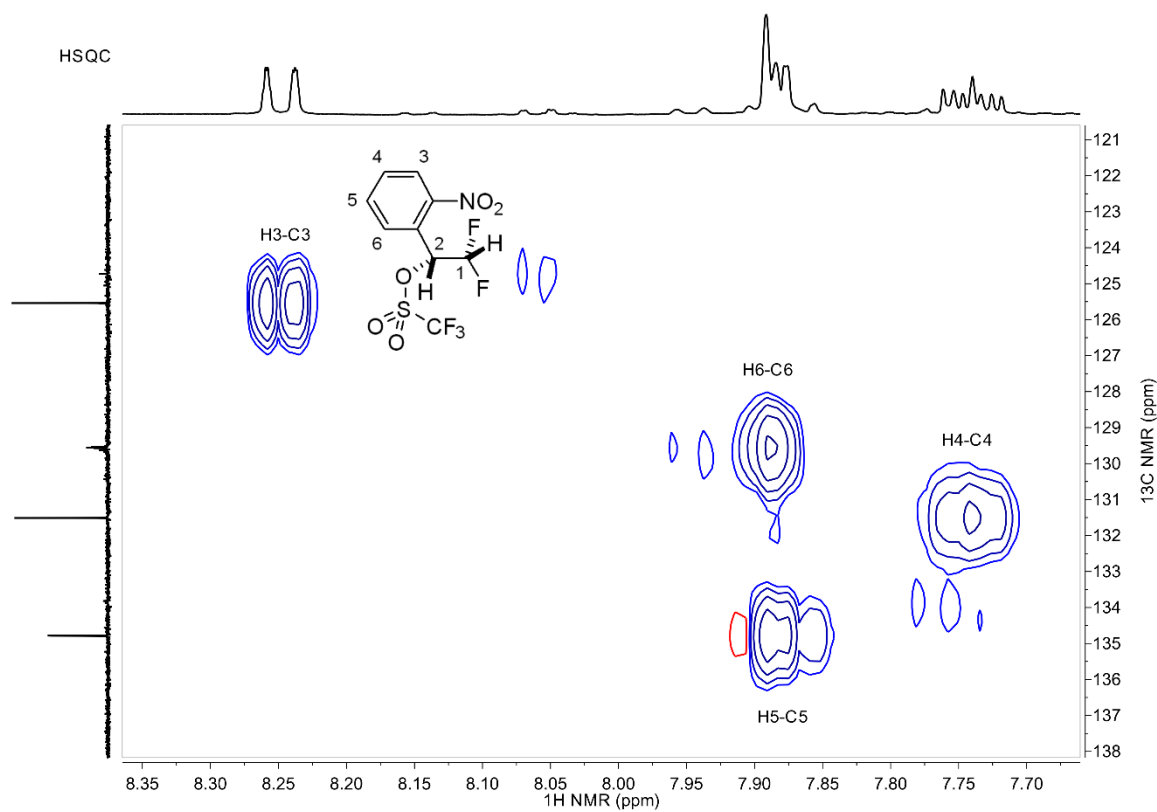

**Figure S86.**  $^1\text{H}$ - $^{13}\text{C}$  HSQC spectrum of 2,2-difluoro-1-(2-nitrophenyl)ethyl triflate (**4-NO<sub>2</sub>**).

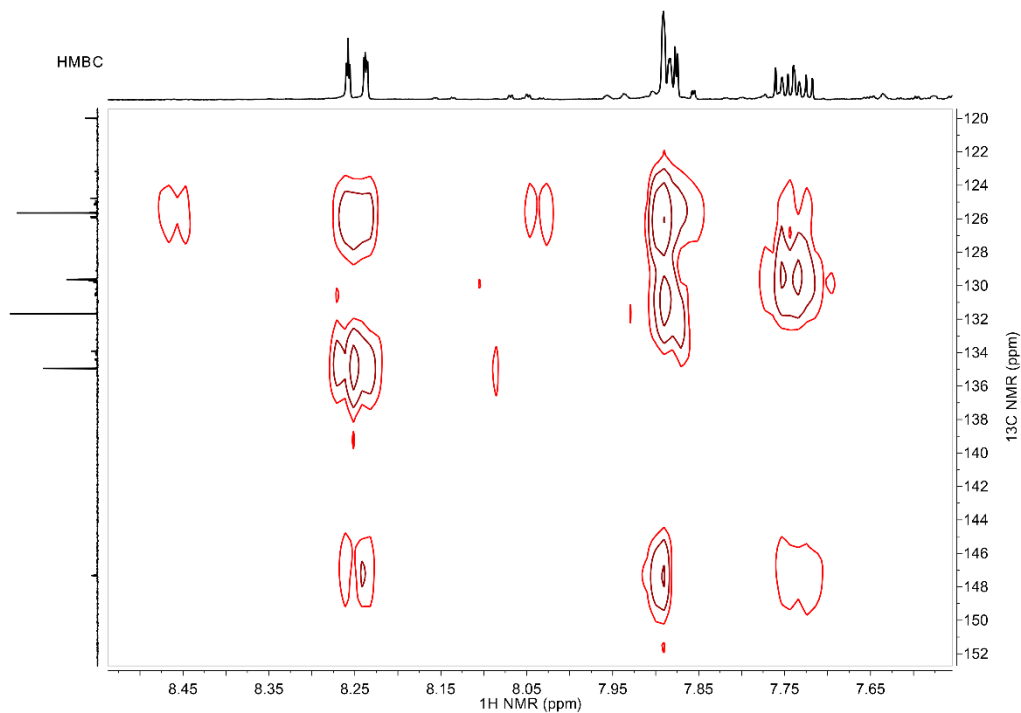

Figure S87.  $^1\text{H}$ - $^{13}\text{C}$  HMBC spectrum of 2,2-difluoro-1-(2-nitrophenyl)ethyl triflate (**4-NO<sub>2</sub>**).

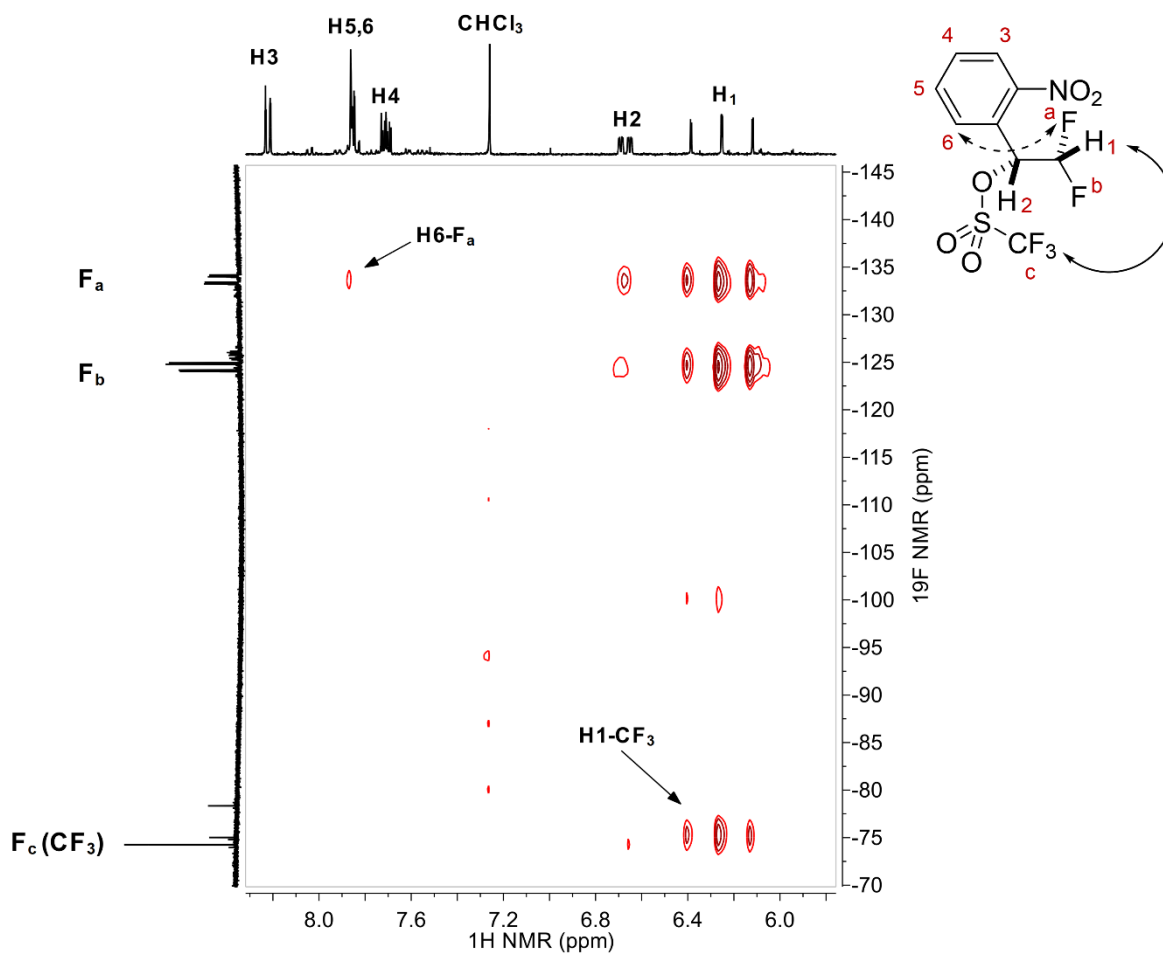

Figure S88.  $^1\text{H}$ - $^{19}\text{F}$  HOESY spectrum of 2,2-difluoro-1-(2-nitrophenyl)ethyl triflate (**4-NO<sub>2</sub>**).

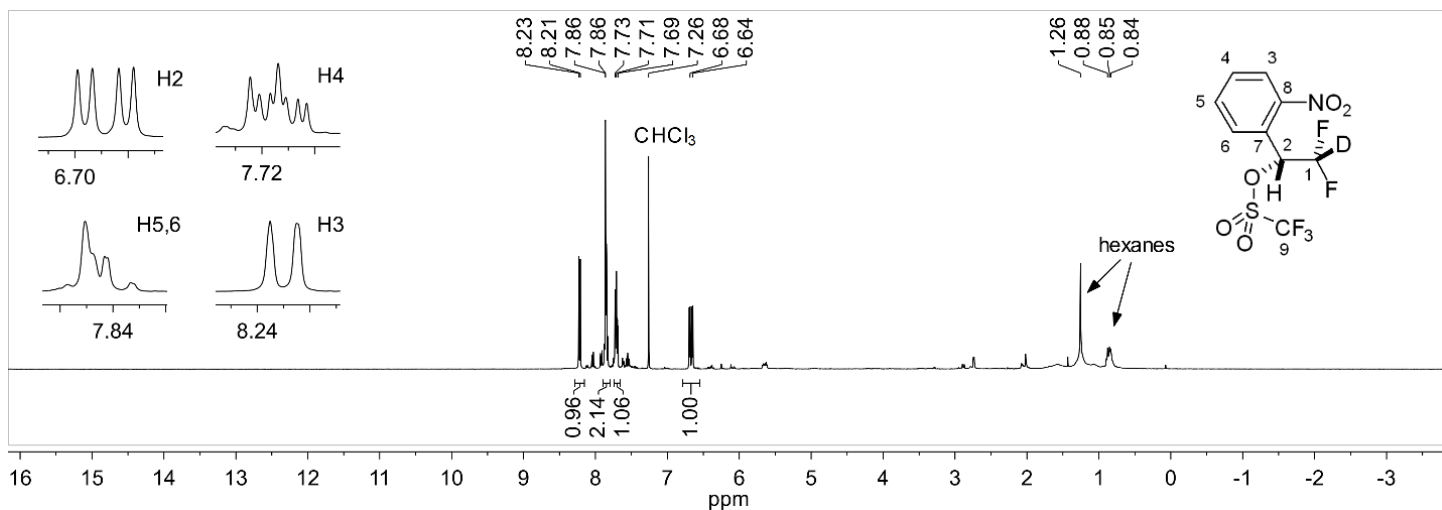

**Figure S89.**  $^1\text{H}$  NMR spectrum of 2,2-difluoro-2-deutero-1-(2-nitrophenyl)ethyl triflate (**4-NO<sub>2</sub>-D**).

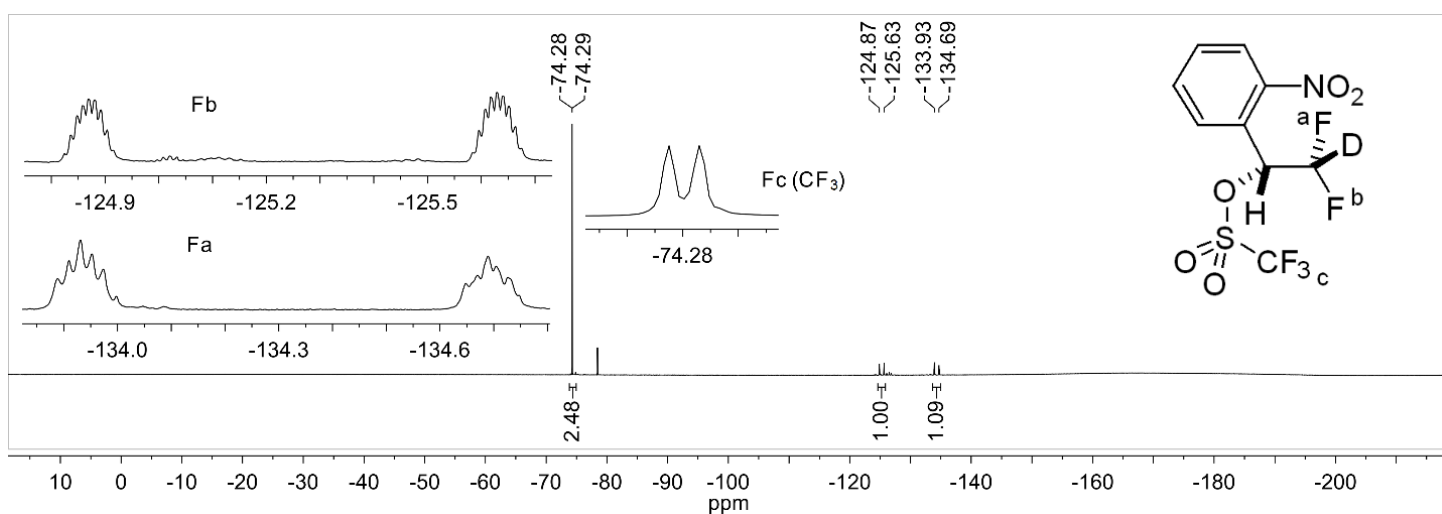

**Figure S90.**  $^{19}\text{F}$  NMR spectrum of 2,2-difluoro-2-deutero-1-(2-nitrophenyl)ethyl triflate (**4-NO<sub>2</sub>-D**).

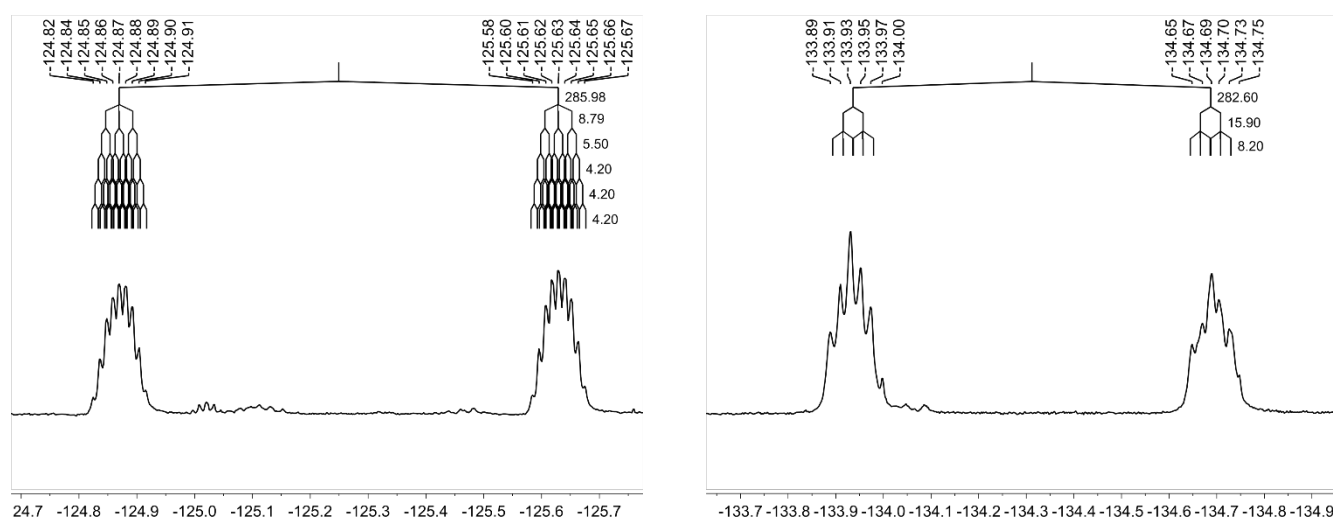

**Figure S91.** Splitting diagrams for Fb (left) and Fa (right) of 2,2-difluoro-2-deutero-1-(2-nitrophenyl)ethyl triflate (**4-NO<sub>2</sub>-D**).

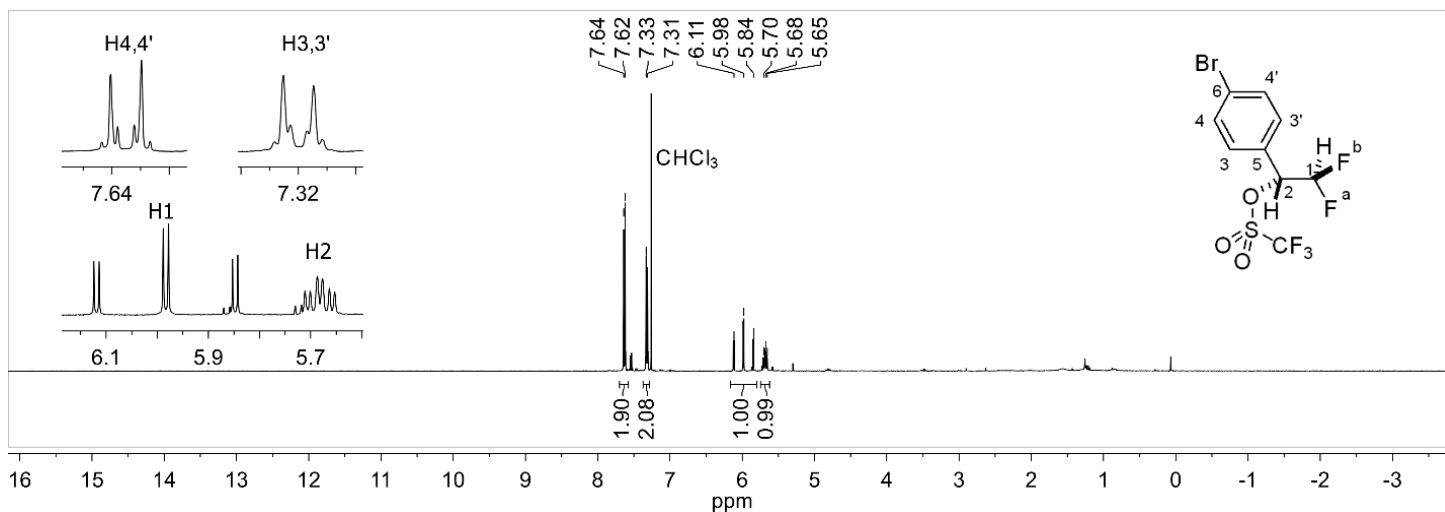

Figure S92.  $^1\text{H}$  NMR spectrum of 1-(4-bromophenyl)-2,2-difluoroethyl triflate (**4-Br**).

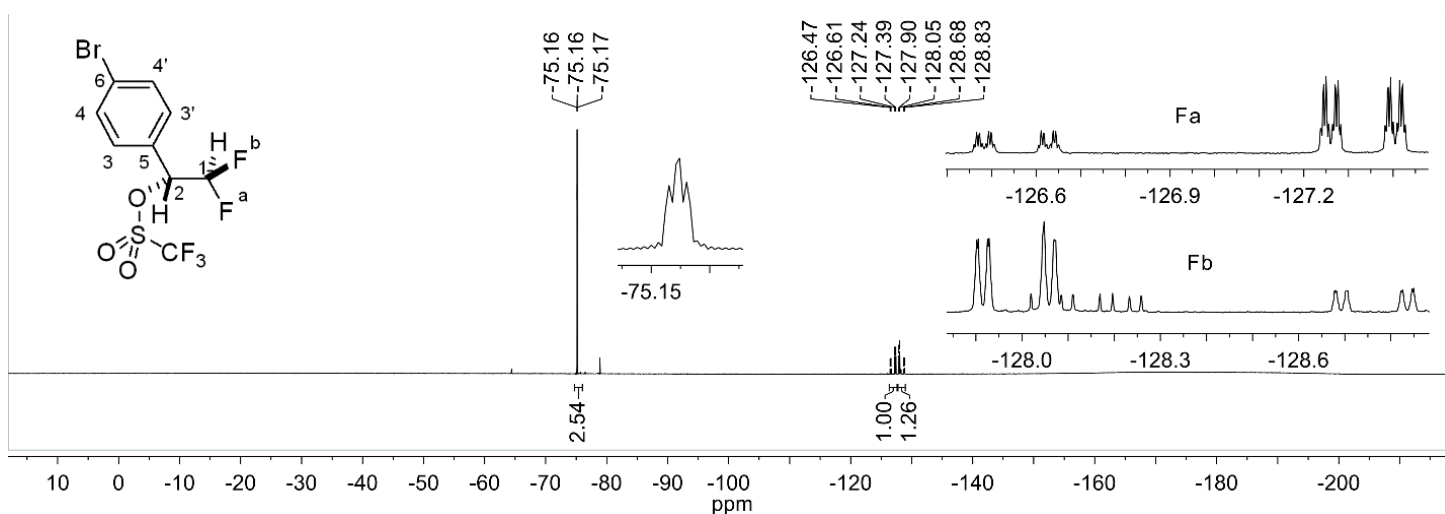

Figure S93.  $^{19}\text{F}$  NMR spectrum of 1-(4-bromophenyl)-2,2-difluoroethyl triflate (**4-Br**).

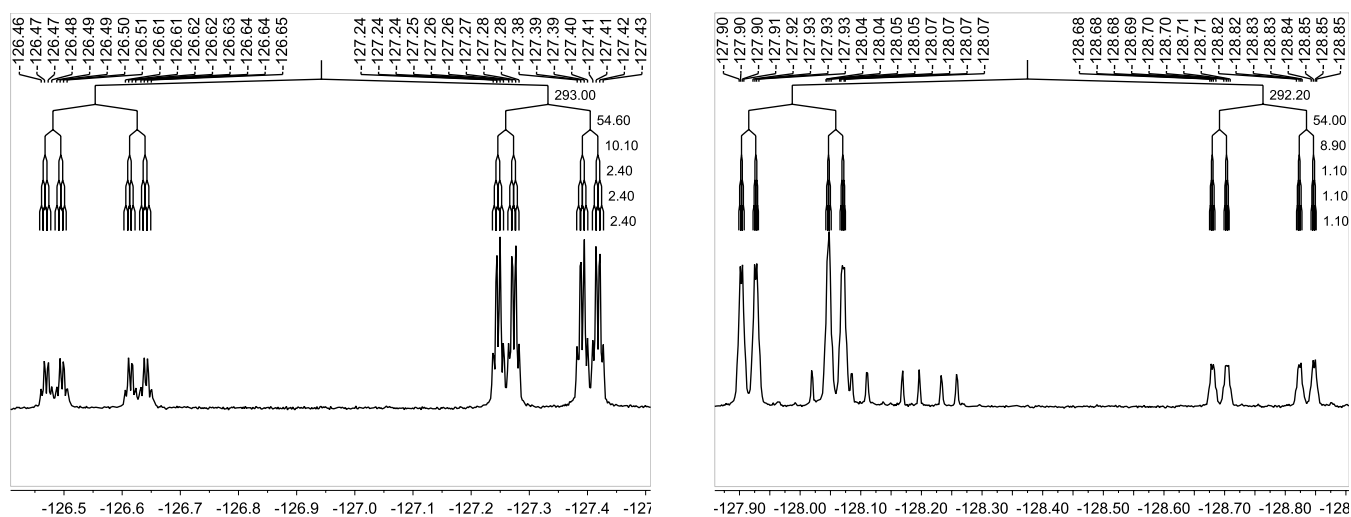

Figure S94. Splitting diagrams for Fa (left) and Fb (right) of 1-(4-bromophenyl)-2,2-difluoroethyl triflate (**4-Br**).

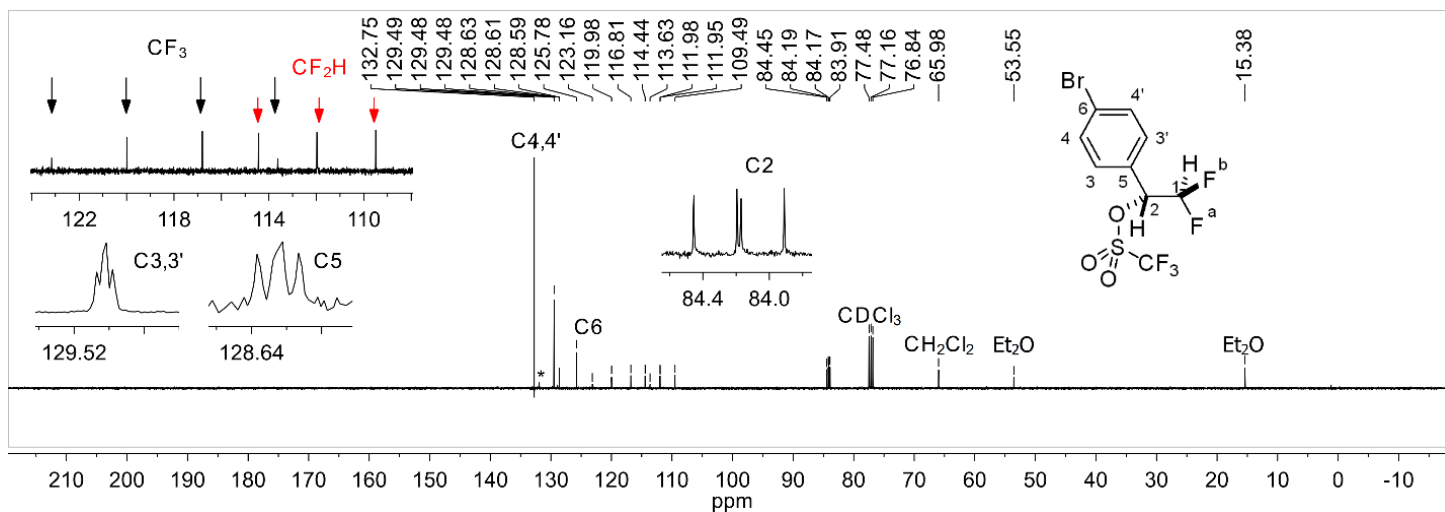

**Figure S95.**  $^{13}\text{C}\{^1\text{H}\}$  NMR spectrum of 1-(4-bromophenyl)-2,2-difluoroethyl triflate (**4-Br**).

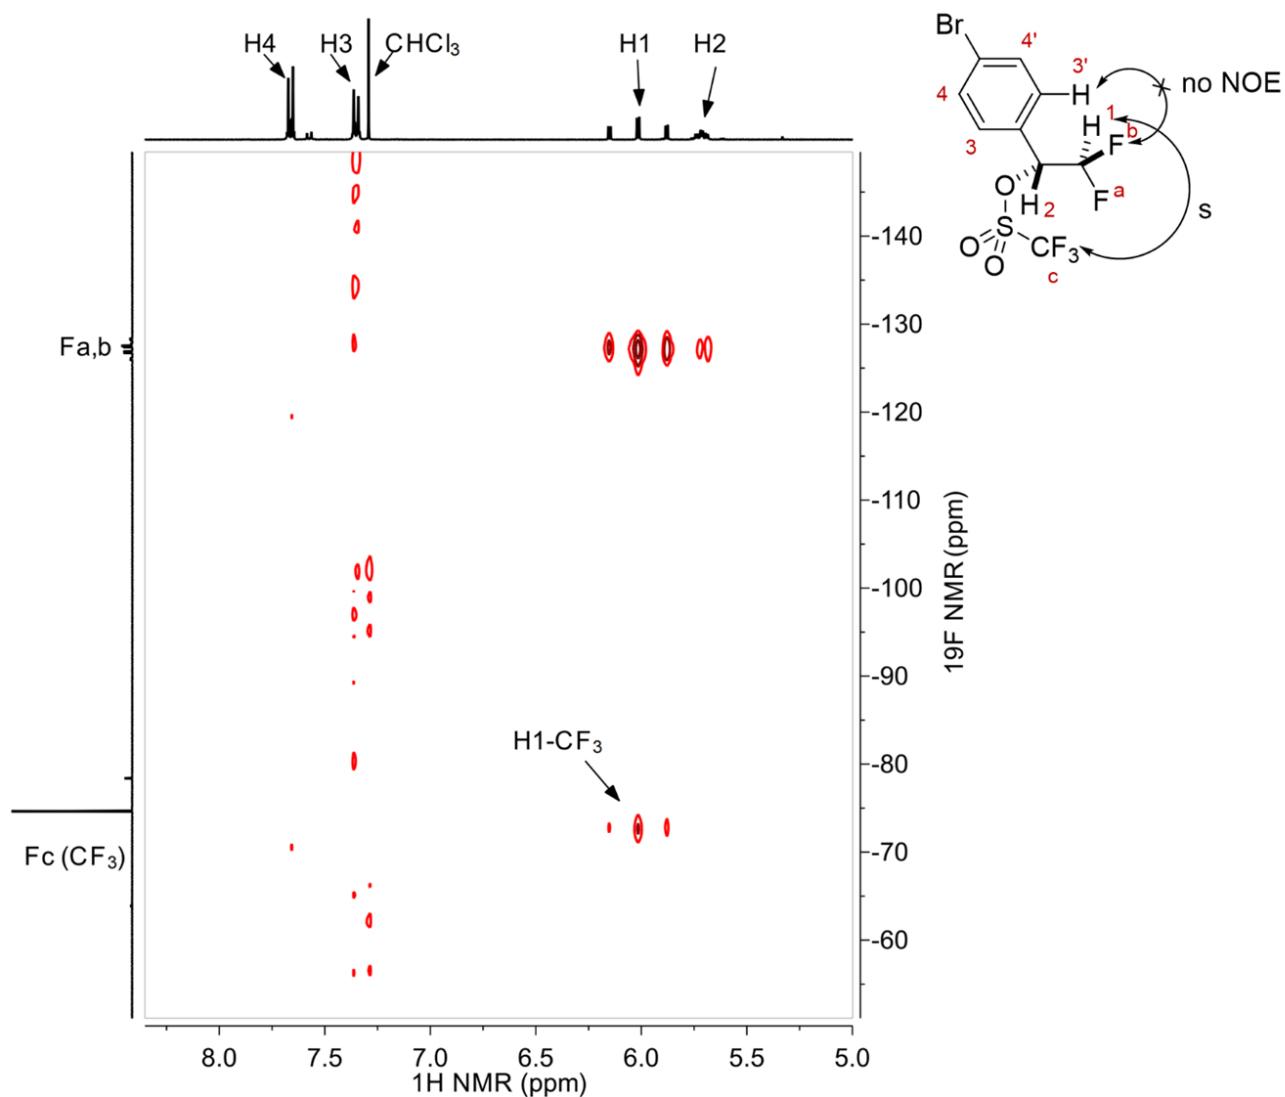

**Figure S96.**  $^1\text{H}$ - $^{19}\text{F}$  HOESY spectrum of 1-(4-bromophenyl)-2,2-difluoroethyl triflate (**4-Br**).

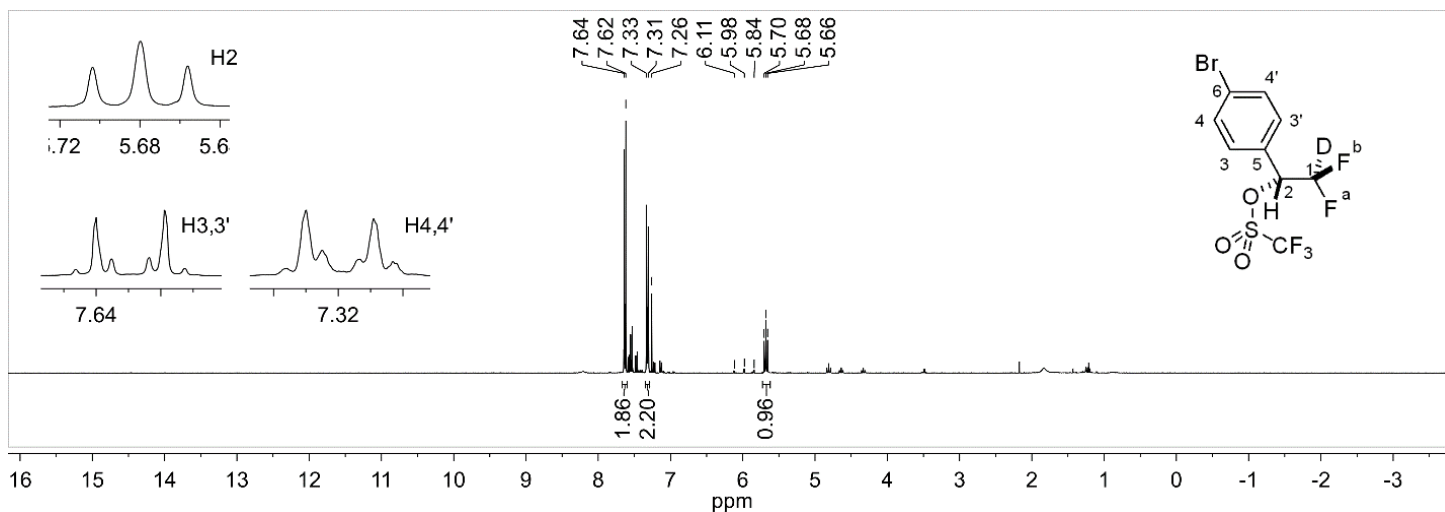

**Figure S97.**  $^1\text{H}$  NMR spectrum of 1-(4-bromophenyl)-2,2-difluoroethyl-2-deutero triflate (**4-Br-D**).

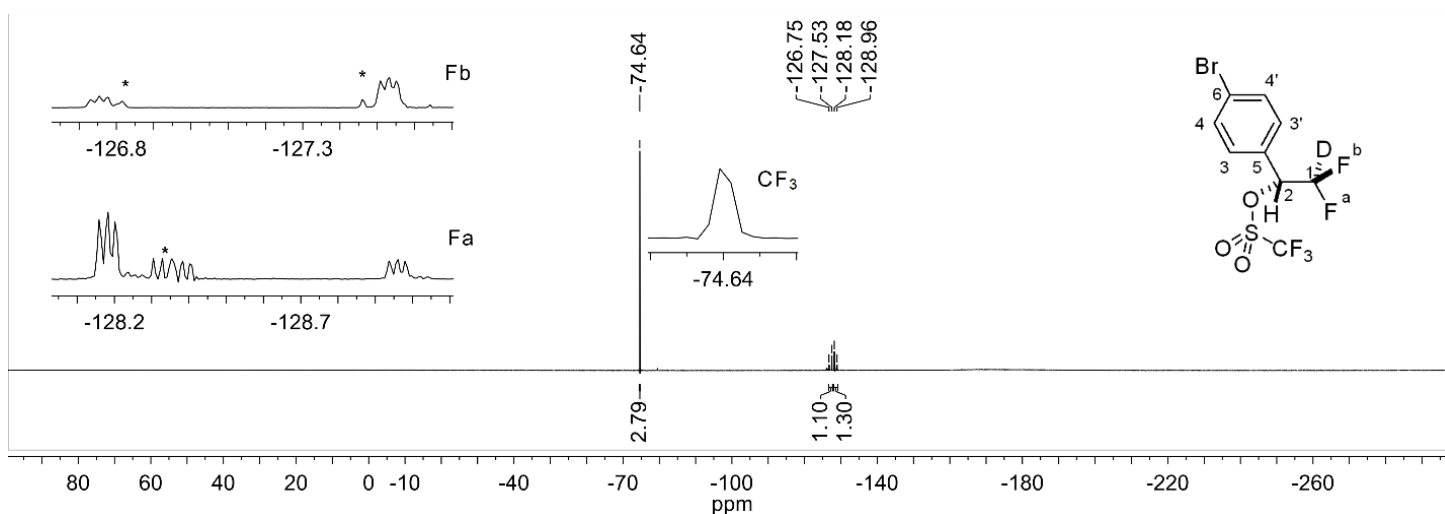

**Figure S98.**  $^{19}\text{F}$  NMR spectrum of 1-(4-bromophenyl)-2,2-difluoroethyl-2-deutero triflate (**4-Br-D**).

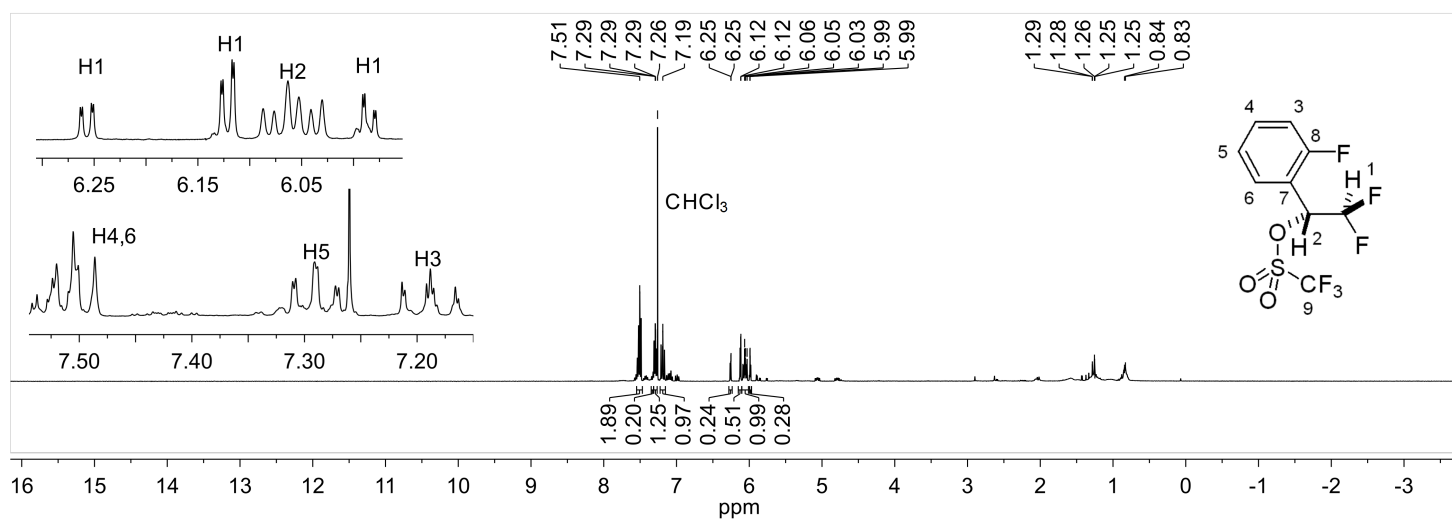

**Figure S99.**  $^1\text{H}$  NMR spectrum of 2,2-difluoro-1-(2-fluorophenyl)ethyl triflate (**4-F**).

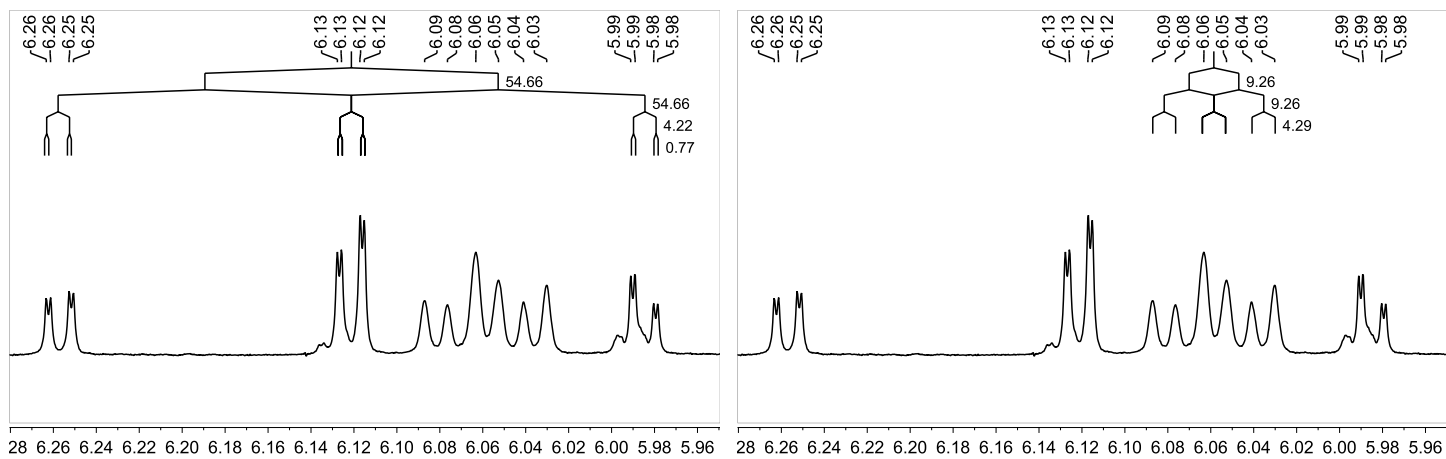

**Figure S100.** Splitting diagrams for H1 (left) and H2 (right) of 2,2-difluoro-1-(2-fluorophenyl)ethyl triflate (**4-F**).

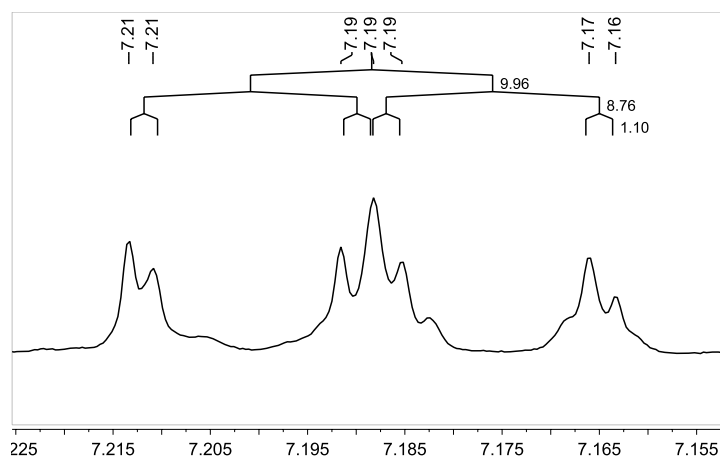

**Figure S101.** Splitting diagram for H3 of 2,2-difluoro-1-(2-fluorophenyl)ethyl triflate (**4-F**).

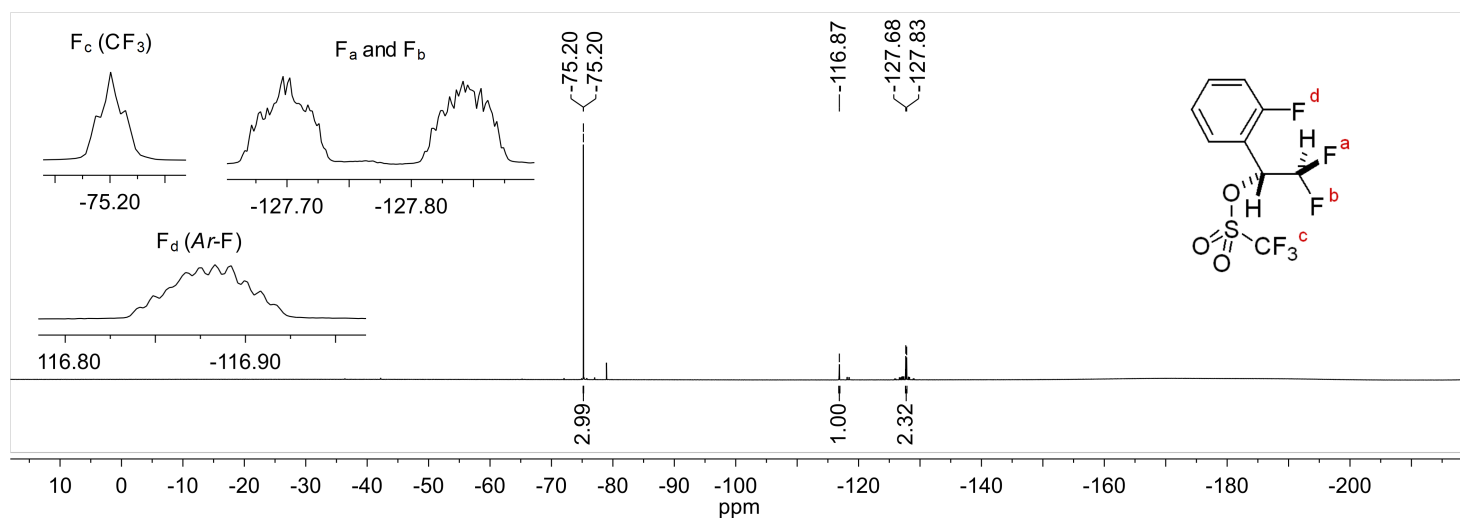

**Figure S102.**  $^{19}\text{F}$  NMR spectrum of 2,2-difluoro-1-(2-fluorophenyl)ethyl triflate (**4-F**).

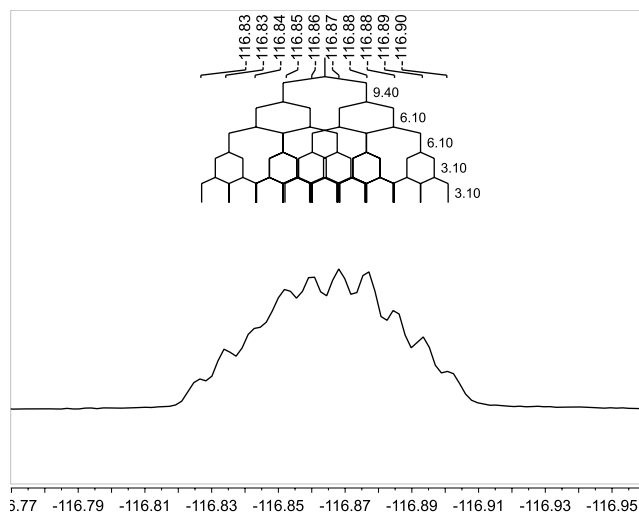

**Figure S103.** Splitting diagram for Fd of 2,2-difluoro-1-(2-fluorophenyl)ethyl triflate (**4-F**) in  $^{19}\text{F}$  NMR spectrum.

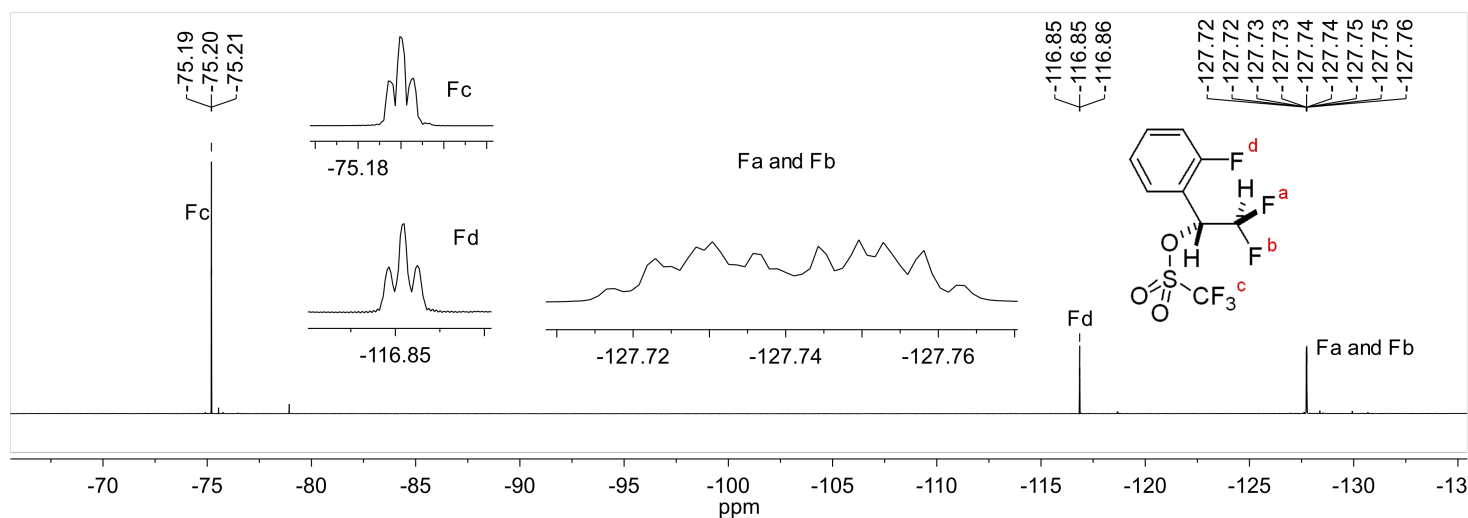

**Figure S104.**  $^{19}\text{F}\{^1\text{H}\}$  NMR spectrum of 2,2-difluoro-1-(2-fluorophenyl)ethyl triflate (**4-F**).

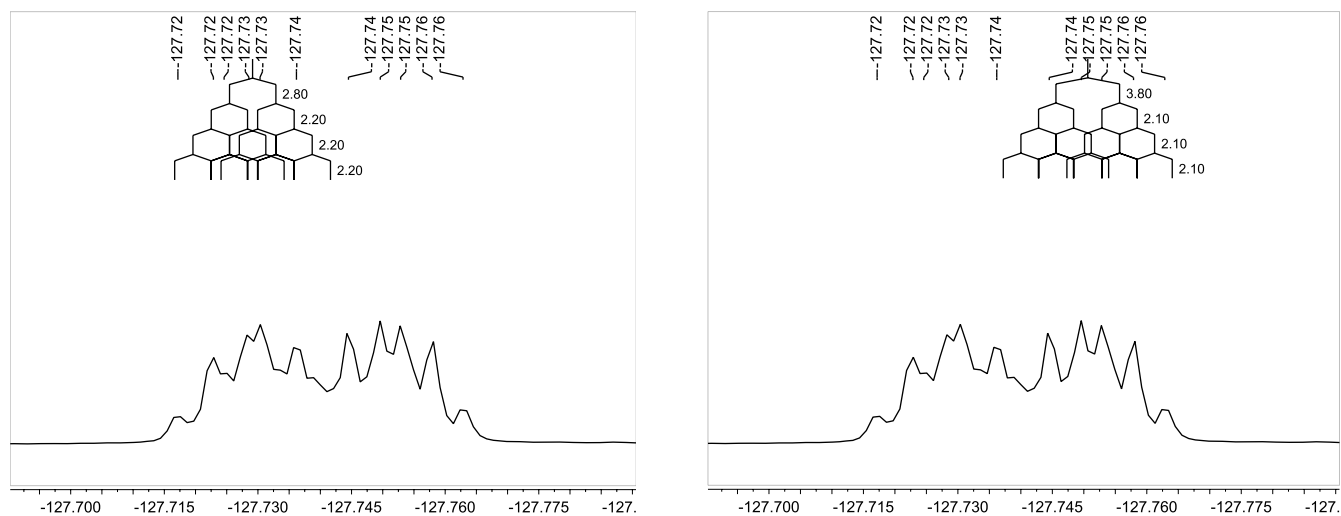

**Figure S105.** Splitting diagrams for Fa (left) and Fb (right) of 2,2-difluoro-1-(2-fluorophenyl)ethyl triflate (**4-F**) in  $^{19}\text{F}\{^1\text{H}\}$  NMR spectrum.



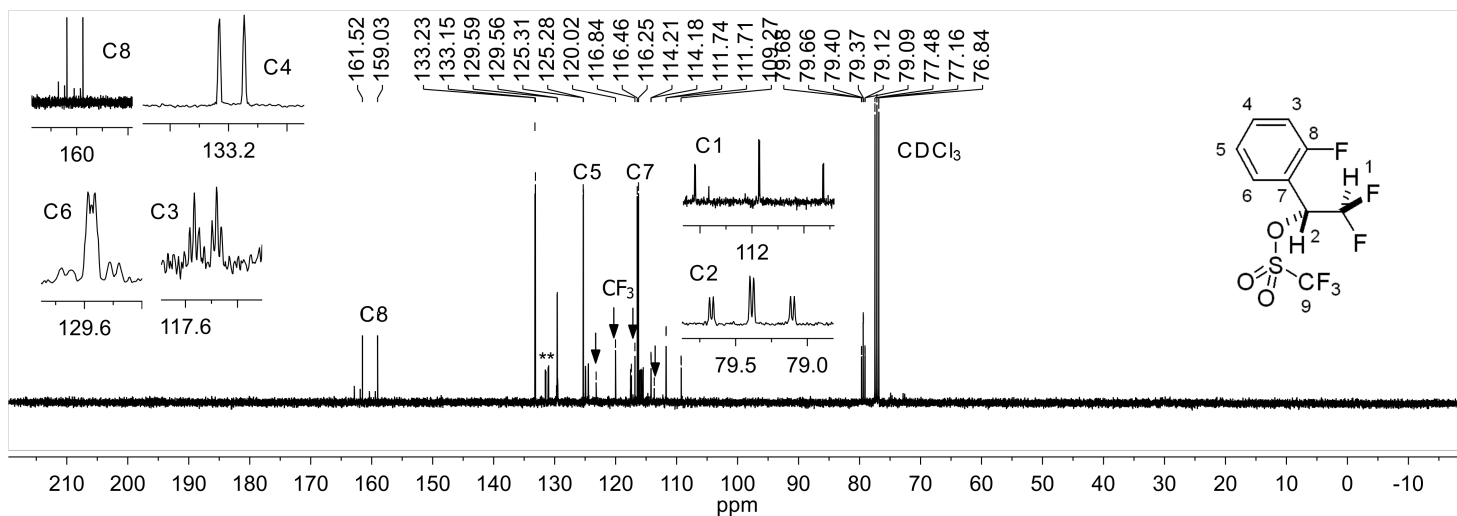

**Figure S106.**  $^{13}\text{C}\{^1\text{H}\}$  NMR spectrum of 2,2-difluoro-1-(2-fluorophenyl)ethyl triflate (**4-F**).

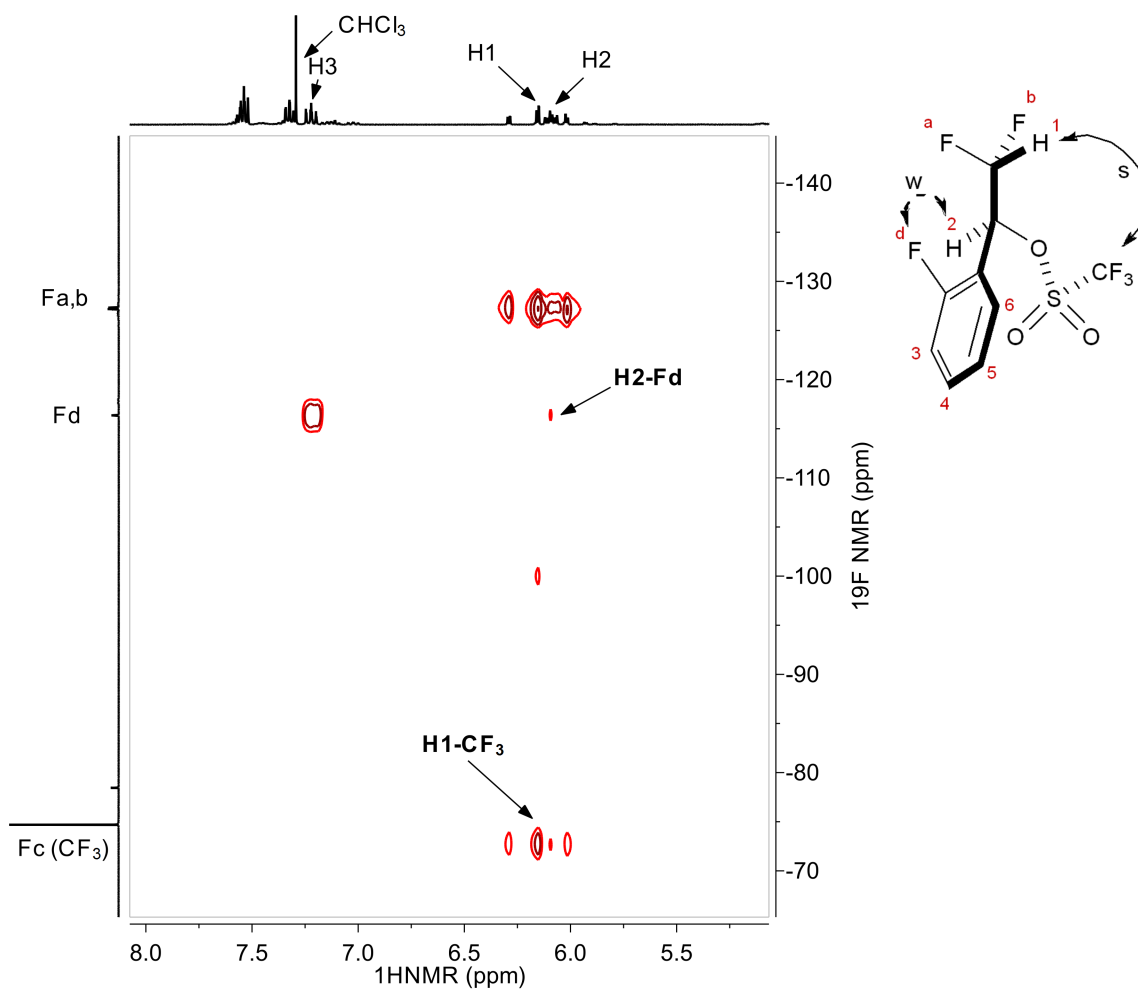

**Figure S107.**  $^1\text{H}\text{-}^{19}\text{F}$  NMR spectrum of 2,2-difluoro-1-(2-fluorophenyl)ethyl triflate (**4-F**).

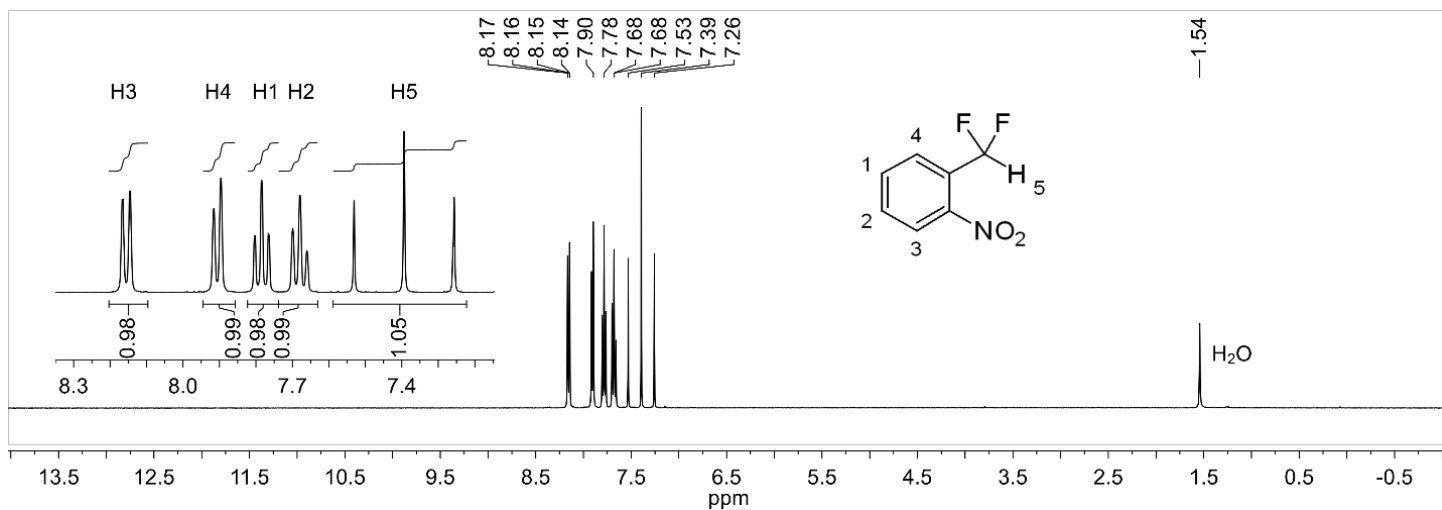

**Figure S108.**  $^1\text{H}$  NMR spectrum of *o*-nitro- $\alpha,\alpha$ -difluorotoluene (**1-CF<sub>2</sub>H**).

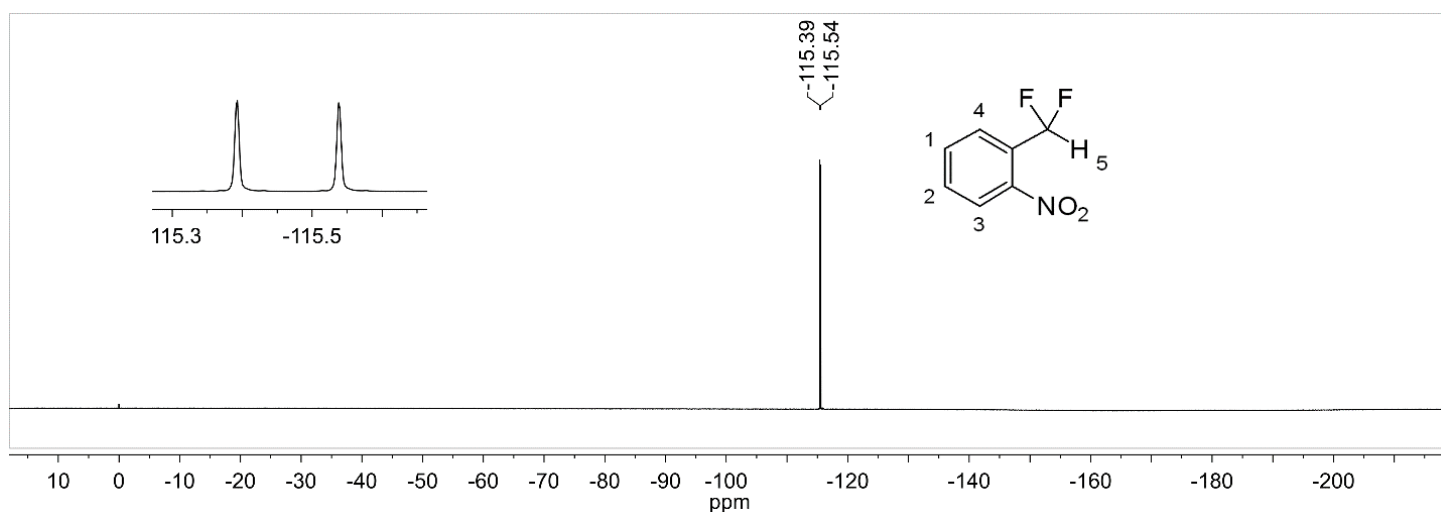

**Figure S109.**  $^{19}\text{F}$  NMR spectrum of *o*-nitro- $\alpha,\alpha$ -difluorotoluene (**1-CF<sub>2</sub>H**).

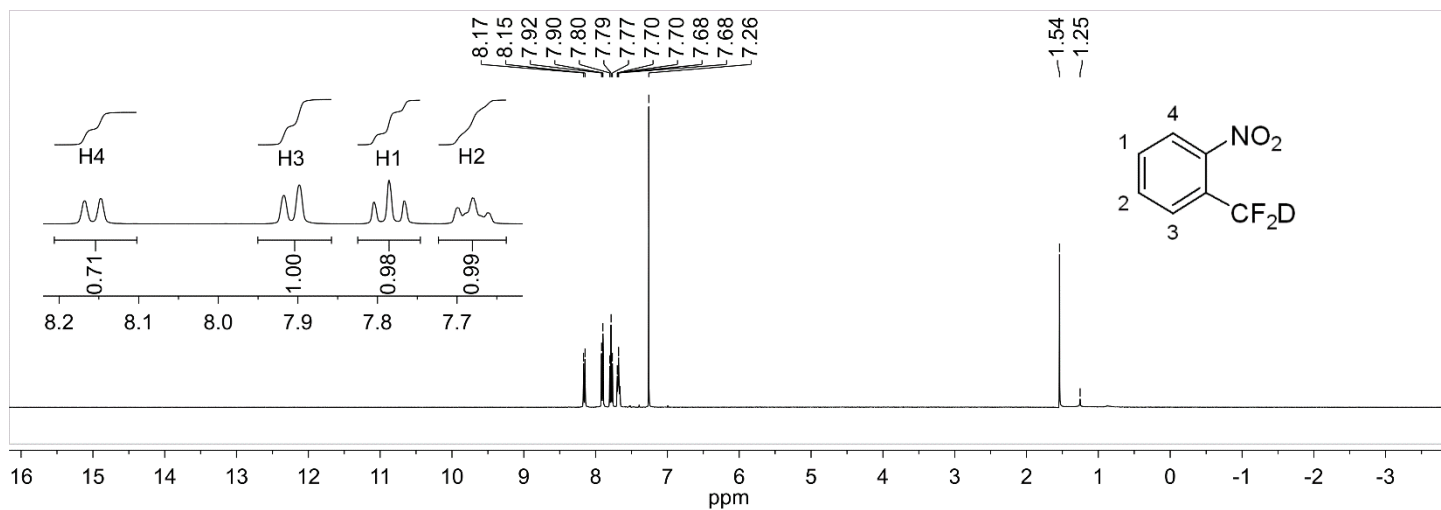

**Figure S110.**  $^1\text{H}$  NMR spectrum of *o*-nitro- $\alpha$ -deutero- $\alpha,\alpha$ -difluorotoluene (**1-CF<sub>2</sub>D**).

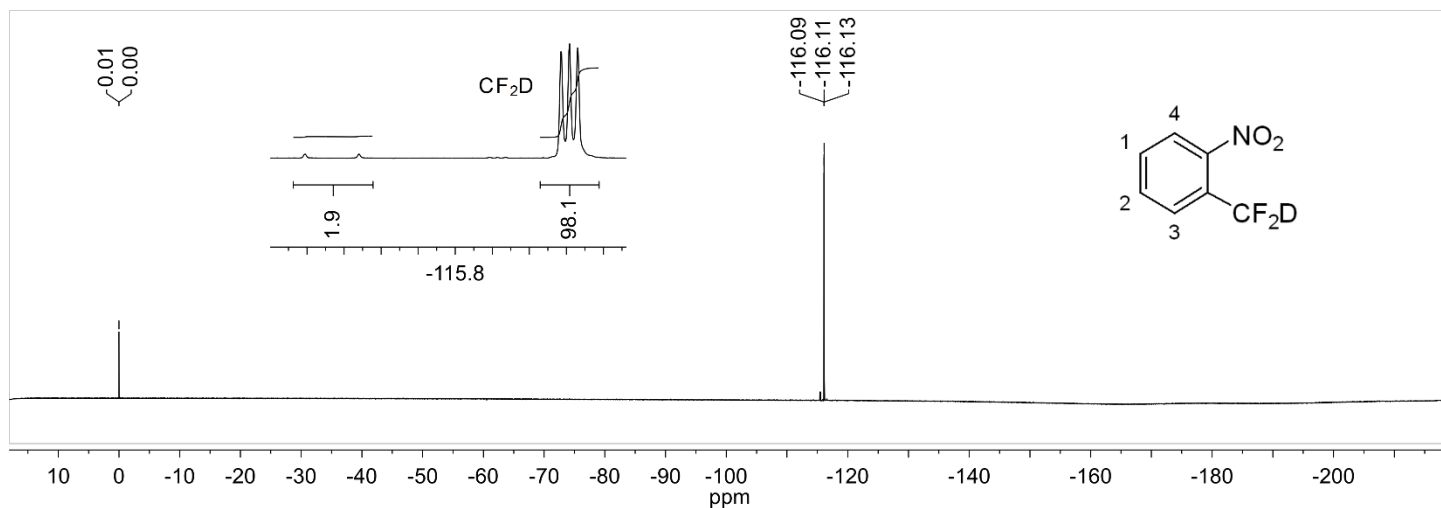

**Figure S111.**  $^{19}\text{F}$  NMR spectrum of *o*-nitro- $\alpha$ -deutero- $\alpha,\alpha$ -difluorotoluene (**1-CF<sub>2</sub>D**).

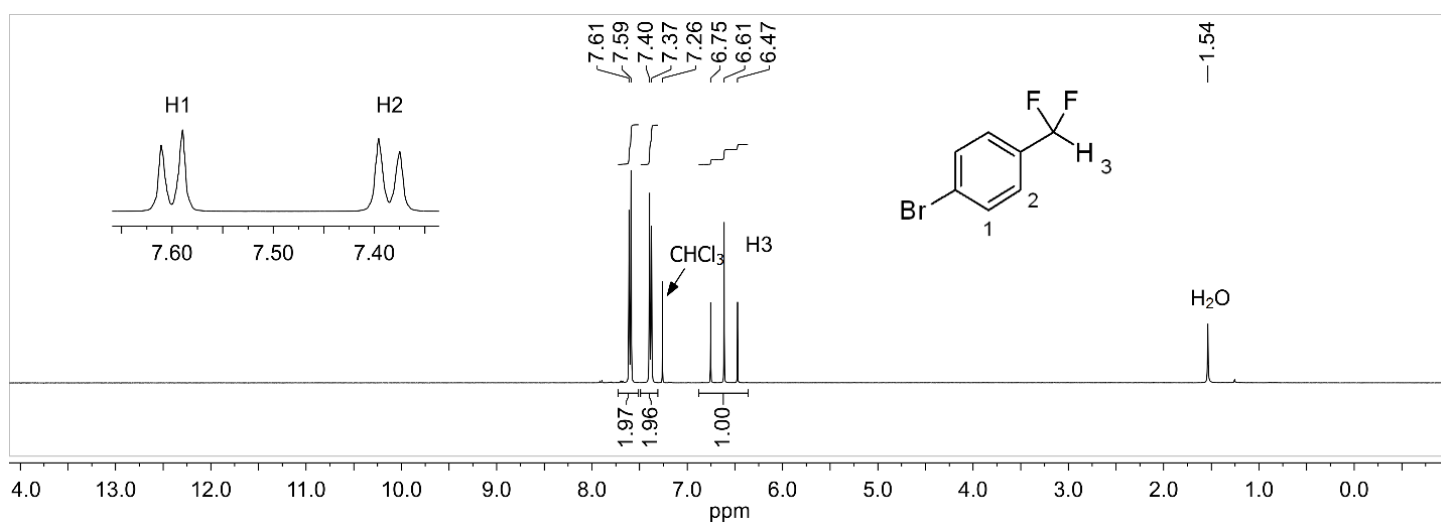

**Figure S112.**  $^1\text{H}$  NMR spectrum of *p*-bromo- $\alpha,\alpha$ -difluorotoluene (**2-CF<sub>2</sub>H**).

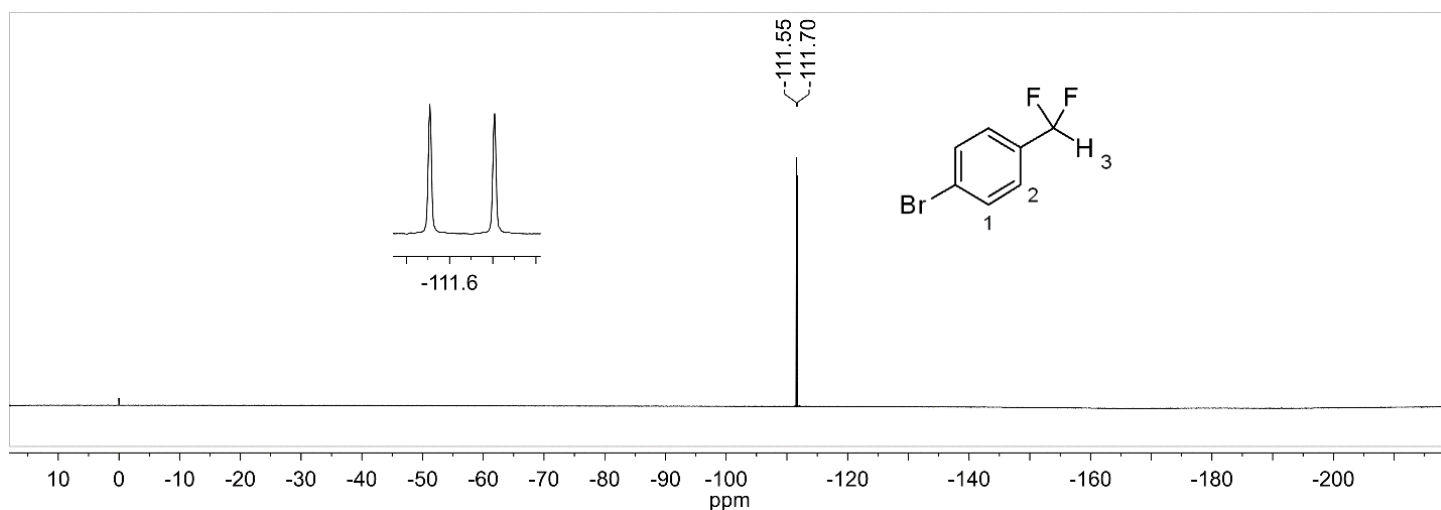

**Figure S113.**  $^{19}\text{F}$  NMR spectrum of *p*-bromo- $\alpha,\alpha$ -difluorotoluene (**2-CF<sub>2</sub>H**).

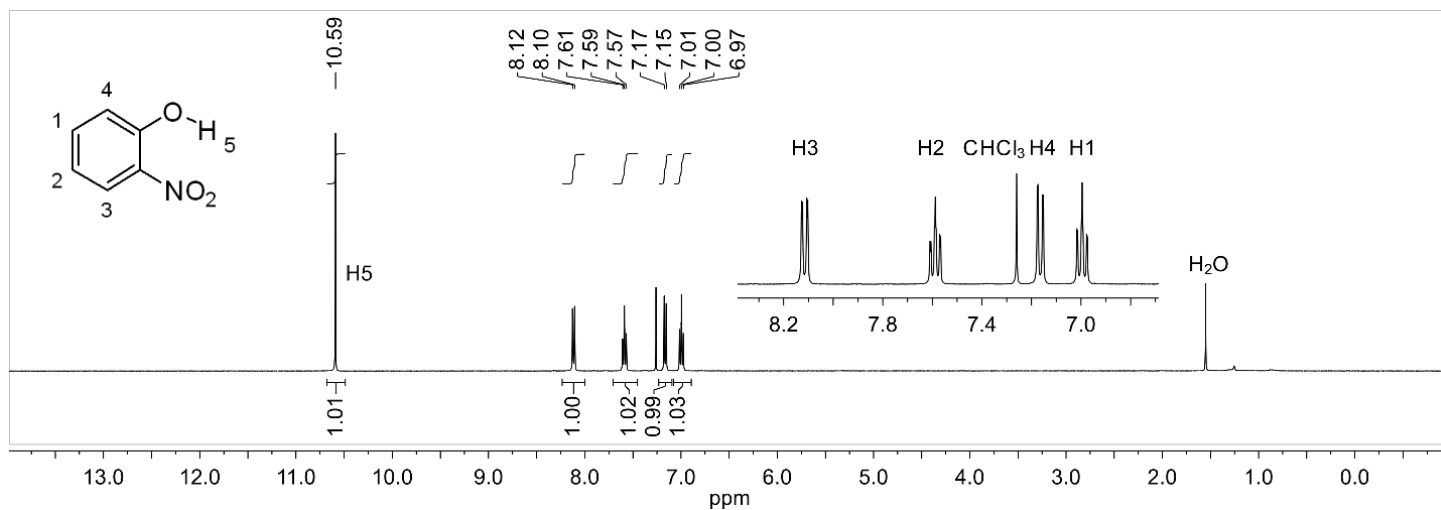

Figure S114.  $^1\text{H}$  NMR spectrum of *o*-nitrophenol (**1-OH**).

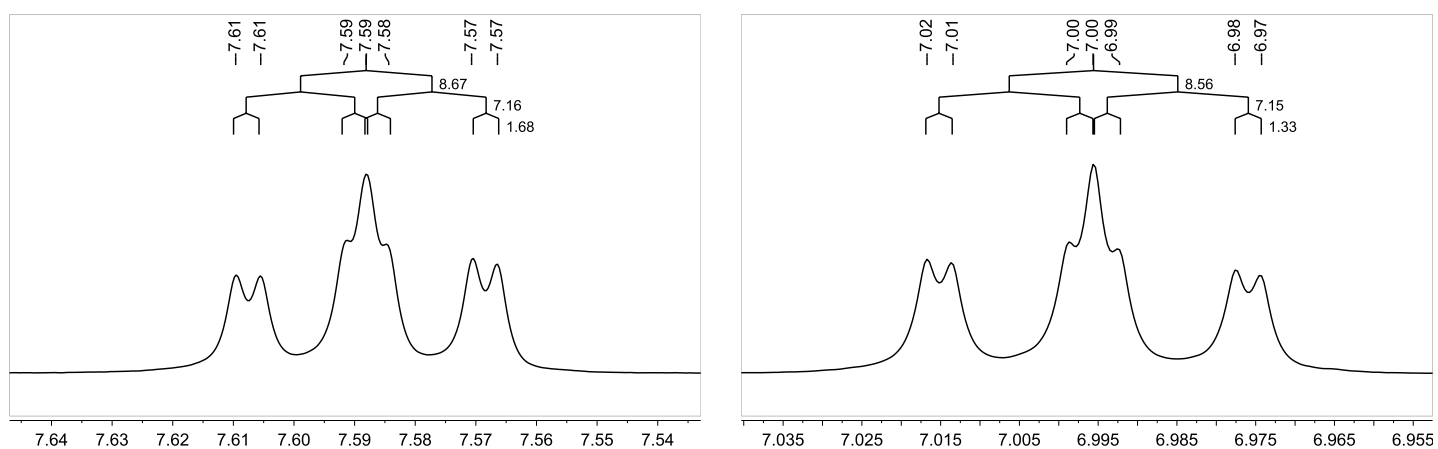

Figure S115. Splitting diagrams for H2 (left) and H1 (right) of *o*-nitrophenol (**1-OH**).

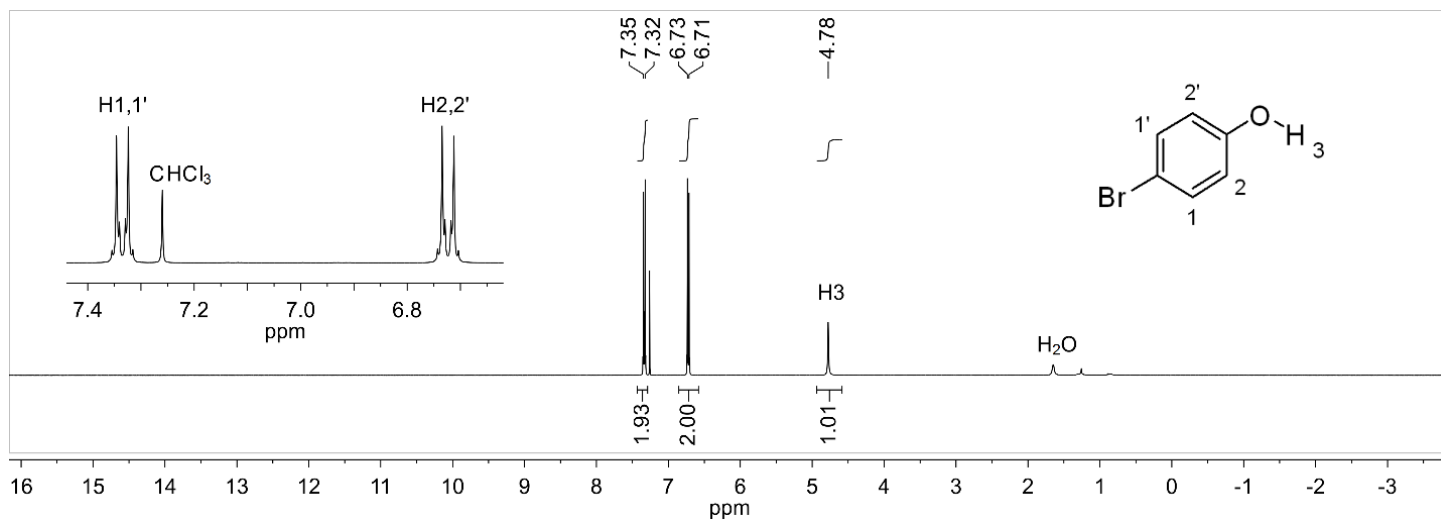

Figure S116.  $^1\text{H}$  NMR spectrum of *p*-bromophenol (**2-OH**).

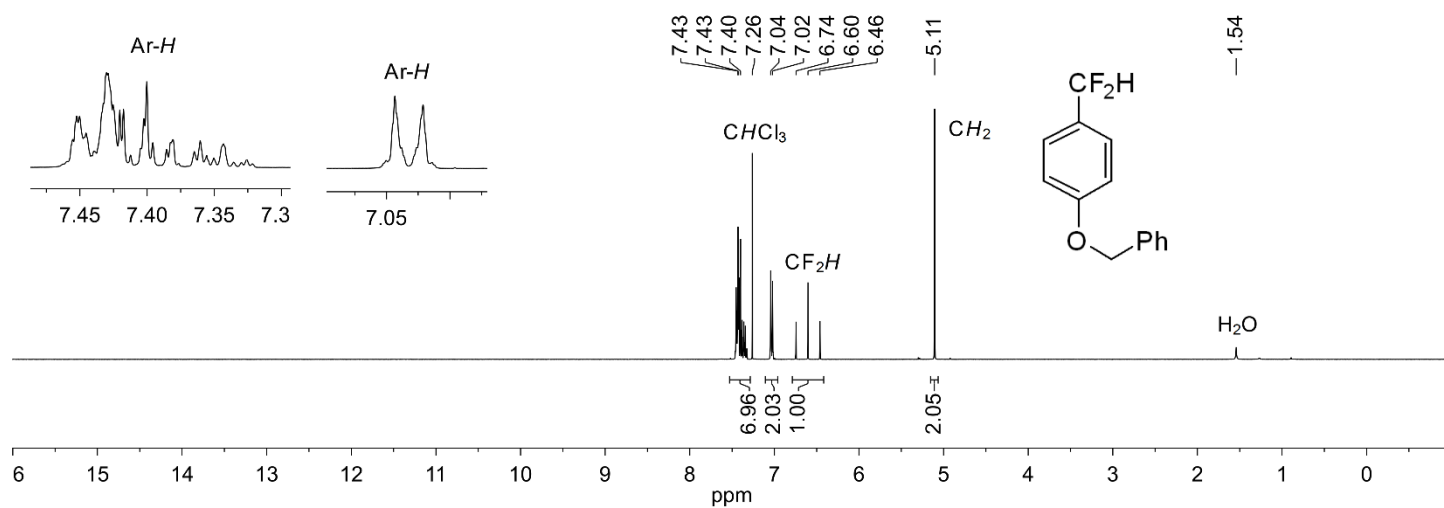

**Figure S117.**  $^1\text{H}$  NMR spectrum of 1-benzyloxy-4-(difluoromethyl)benzene (**5-CF<sub>2</sub>H**).

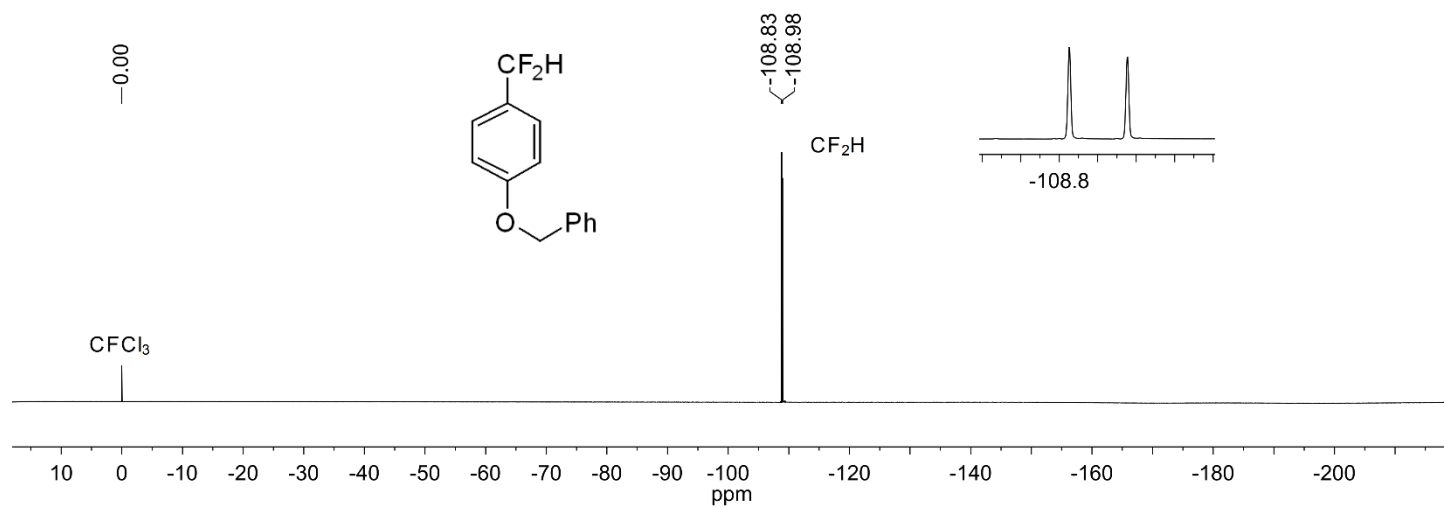

**Figure S118.**  $^{19}\text{F}$  NMR spectrum of 1-benzyloxy-4-(difluoromethyl)benzene (**5-CF<sub>2</sub>H**).

## 8. *o*-Substituent Effects on the $^1\text{H}$ NMR Chemical Shift of the $\text{CF}_2\text{H}$ Group

An analysis of  $^1\text{H}$  NMR data of  $\alpha$ -difluoromethylbenzyl alcohols ( $\text{ArCH}(\text{OH})\text{CF}_2\text{H}$ ) suggests that the deshielding of  $\text{CF}_2\text{H}$  proton is associated with hydrogen bonding acceptors in the *ortho*-position on the phenyl ring. In the absence of hydrogen bonding acceptors in the *ortho*-position, the  $\text{CF}_2\text{H}$  proton peaks appear below 5.80 ppm in  $\text{CDCl}_3$  (Figure S119, compounds a-c). The  $\text{CF}_2\text{H}$  protons are slightly deshielded when a weak hydrogen bonding acceptor is present in the *ortho*-position (Figure S119, compounds d-f). Strong hydrogen bonding acceptors lead to significant deshielding of the  $\text{CF}_2\text{H}$  proton, indicating the presence of hydrogen bonding interactions (Figure S119, compounds g-h).

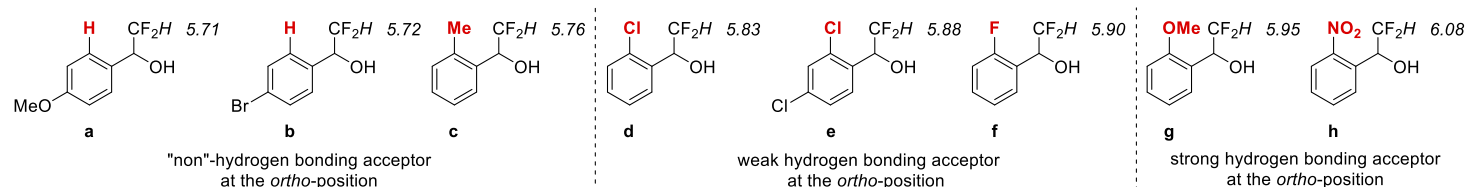

**Figure S119.**  $\text{CF}_2\text{H}$  proton chemical shifts of various  $\alpha$ -difluoromethylbenzyl alcohols ( $\text{ArCH}(\text{OH})\text{CF}_2\text{H}$ ) in  $\text{CDCl}_3$ . Data for compounds a, d, e, and g are from reference <sup>2</sup>. Data for compound c are from reference <sup>28</sup>. Data for the remaining compounds are from this work.

## References

1. Tyutyunov, A. A.; Boyko, V. E.; Igoumnov, S. M. The Unusual Reaction of (Trifluoromethyl)Trimethylsilane with Sodium Borohydride *Fluorine Notes* [Online], 2011. [http://notes.fluorine1.ru/public/2011/1\\_2011/letters/letter2.html](http://notes.fluorine1.ru/public/2011/1_2011/letters/letter2.html) (accessed Mar 3, 2017).
2. Zhao, Y.; Huang, W.; Zheng, J.; Hu, J., *Org. Lett.* **2011**, *13*, 5342-5345.
3. Feng, Z.; Min, Q.-Q.; Zhang, X., *Org. Lett.* **2016**, *18*, 44-47.
4. Reichardt, C.; Welton, T., *Solvents and Solvent Effects in Organic Chemistry*. 4th ed.; Wiley-VCH Verlag GmbH & Co. KGaA: Weinheim, Germany, 2011.
5. Frisch, M. J.; Trucks, G. W.; Schlegel, H. B.; Scuseria, G. E.; Robb, M. A.; Cheeseman, J. R.; Scalmani, G.; Barone, V.; Mennucci, B.; Petersson, G. A.; Nakatsuji, H.; Caricato, M.; Li, X.; Hratchian, H. P.; Izmaylov, A. F.; Bloino, J.; Zheng, G.; Sonnenberg, J. L.; Hada, M.; Ehara, M.; Toyota, K.; Fukuda, R.; Hasegawa, J.; Ishida, M.; Nakajima, T.; Honda, Y.; Kitao, O.; Nakai, H.; Vreven, T.; Montgomery Jr., J. A.; Peralta, J. E.; Ogliaro, F.; Bearpark, M. J.; Heyd, J.; Brothers, E. N.; Kudin, K. N.; Staroverov, V. N.; Kobayashi, R.; Normand, J.; Raghavachari, K.; Rendell, A. P.; Burant, J. C.; Iyengar, S. S.; Tomasi, J.; Cossi, M.; Rega, N.; Millam, N. J.; Klene, M.; Knox, J. E.; Cross, J. B.; Bakken, V.; Adamo, C.; Jaramillo, J.; Gomperts, R.; Stratmann, R. E.; Yazyev, O.; Austin, A. J.; Cammi, R.; Pomelli, C.; Ochterski, J. W.; Martin, R. L.; Morokuma, K.; Zakrzewski, V. G.; Voth, G. A.; Salvador, P.; Dannenberg, J. J.; Dapprich, S.; Daniels, A. D.; Farkas, Ö.; Foresman, J. B.; Ortiz, J. V.; Cioslowski, J.; Fox, D. J. *Gaussian 09*, Gaussian, Inc.: Wallingford, CT, USA, 2009.
6. Zhao, Y.; Truhlar, D. G., *Theor. Chem. Acc.* **2008**, *120*, 215-241.
7. Lodewyk, M. W.; Siebert, M. R.; Tantillo, D. J., *Chem. Rev.* **2012**, *112*, 1839-1862.
8. Gottlieb, H. E.; Kotlyar, V.; Nudelman, A., *J. Org. Chem.* **1997**, *62*, 7512-7515.
9. Bailey, W. F.; Cioffi, E. A.; Wiberg, K. B., *J. Org. Chem.* **1981**, *46*, 4219-4225.
10. Knauber, T.; Arikan, F.; Rösenthaler, G. V.; Gooßen, L. J., *Chem. Eur. J.* **2011**, *17*, 2689-2697.
11. Yang, H.; Li, Y.; Jiang, M.; Wang, J.; Fu, H., *Chem. Eur. J.* **2011**, *17*, 5652-5660.
12. Ramaiah, P.; Krishnamurti, R.; Prakash, G. K. S., *Org. Synth.* **1995**, *72*, 5.
13. Kreamsner, J. M.; Rack, M.; Pilger, C.; Oliver Kappe, C., *Tetrahedron Lett.* **2009**, *50*, 3665-3668.
14. Surya Prakash, G. K.; Reddy, V. P.; Li, X.-Y.; Olah, G. A., *Synlett* **1990**, *1990*, 594-596.
15. Allen, L. C., *J. Am. Chem. Soc.* **1989**, *111*, 9003-9014.
16. Rahm, M.; Hoffmann, R., *J. Am. Chem. Soc.* **2015**, *137*, 10282-10291.
17. Pauling, L., *The Nature of the Chemical Bond and the Structure of Molecules and Crystals : An Introduction to Modern Structural Chemistry*. 3rd ed.; Cornell University Press: Ithaca, N.Y., 1960.
18. Rahm, M.; Hoffmann, R., *J. Am. Chem. Soc.* **2016**, *138*, 3731-3744.
19. Bader, R. F. W., *Atoms in molecules : a quantum theory*. Clarendon Press: Oxford; New York, 1990.
20. Kohout, M. *DGrid*, 4.6; Radebeul, 2011.
21. *APEX2 v.4.0*, Bruker AXS, Inc.: Madison, WI, 2008.
22. *SAINT: SAX Area-Detector Integration Program*, University of Göttingen: Göttingen, Germany, 2008.
23. Sheldrick, G. M. *SADABS: Area-Detector Absorption Correction*, University of Göttingen: Göttingen, Germany, 2008.
24. Sheldrick, G. M., *Acta. Crystallogr. A* **2015**, *71*, 3-8.
25. Sheldrick, G. M., *Acta. Crystallogr. C* **2015**, *71*, 3-8.
26. Spek, A. L. *PLATON: A Multipurpose Crystallographic Tool*, University of Utrecht: Utrecht, The Netherlands, 2008.
27. Macrae, C. F.; Edgington, P. R.; McCabe, P.; Pidcock, E.; Shields, G. P.; Taylor, R.; Towler, M.; van de Streek, J., *J. Appl. Crystallogr.* **2006**, *39*, 453-457.
28. Kaneko, S.; Yamazaki, T.; Kitazume, T., *J. Org. Chem.* **1993**, *58*, 2302-2312.
